# Supplementary material for: Allele-specific transcription factor binding across human brain regions offers mechanistic insight into eQTLs
Source: HighWire-hosted journal article supplement (doi:10.1101/gr.278601.123), 2024-08-01
Supplement: Supplemental_Table_1.xlsx [file Supplemental_Table_1.xlsx]

## Sheet: summary_5397-JL-0001
Supplemental Table 1: QC metrics for 10x WGS
donor_id	subject_ID	DNA_extraction	longranger_version	instrument_ids	gems_detected	mean_dna_per_gem	bc_on_whitelist	bc_mean_qscore	n50_linked_reads_per_molecule	corrected_loaded_mass_ng	snps_phased	genes_phased_lt_100kb	longest_phase_block	n50_phase_block	molecule_length_mean	molecule_length_stddev	number_reads	median_insert_size	mean_depth	zero_coverage	mapped_reads	pcr_duplication	r1_q20_bases_fract	r1_q30_bases_fract	r2_q20_bases_fract	r2_q30_bases_fract	si_q20_bases_fract	si_q30_bases_fract	bc_q20_bases_fract	bc_q30_bases_fract	large_sv_calls	short_deletion_calls	run_ID
Donor1	UCI-1224	Qiagen_HMW	2.2.2	E00431	1667282	553390	0.924073	38.0245	9	1.30178	0.989047	0.926879	3122655	561251	19674.9	23708.3	814678586	343	34.8536	0.0102999	0.961879	0.0509009	0.95134	0.899816	0.898881	0.814924	0.959863	0.932717	0.987277	0.967262	414	4345	5397_0001
Donor2	UCI-1230	Qiagen_HMW	2.2.2	E00431	1639200	534708	0.924058	38.178	12	1.25783	0.981094	0.936578	4376434	703379	25188.8	25822.6	811577022	292	34.4366	0.00268971	0.958618	0.0464517	0.957295	0.911629	0.906925	0.826071	0.963144	0.938729	0.989267	0.972314	282	3971	5397_0002
