# Supplementary material for: Allele-specific transcription factor binding across human brain regions offers mechanistic insight into eQTLs
Source: HighWire-hosted journal article supplement (doi:10.1101/gr.278601.123), 2024-08-01
Supplement: Supplemental_Table_2.xlsx [file Supplemental_Table_2.xlsx]

## Sheet: ST2_GraphGenome
Supplemental Table 2.For 20 ChIP-seq datasets, the percentage of reads which were mapped to the reference genome when using a linear genome (Linear) or a personalized graph genome (Graph) for donor 1 (left) and donor 2 (right).
TF	Brain Region	Linear	Graph	Donor
Control	NA	99.48	99.95	Donor1
BCL11A	DLPFC	86.88	91.61	Donor1
CREB	CB	98.54	99.37	Donor1
CTCF	OL	94.99	96.97	Donor1
CTCF	SG	96.24	97.7	Donor1
MEF2A	DLPFC	97.21	98.47	Donor1
RAD21	ANCG	96.64	98.04	Donor1
RAD21	HC	95.8	97.46	Donor1
SP1	AMY	94.35	96.49	Donor1
TBR1	DLPFC	96.41	97.93	Donor1
Control	NA	99.47	99.95	Donor2
BCL11A	DLPFC	90.69	93.23	Donor2
CREB1	CB	98.65	98.24	Donor2
CTCF	OL	94.72	96.15	Donor2
CTCF	SG	96.3	96.86	Donor2
MEF2A	DLPFC	96.83	97.22	Donor2
RAD21	ANCG	97.62	97.6	Donor2
RAD21	HC	96.77	96.97	Donor2
SP1	AMY	93.37	95.15	Donor2
TBR1	DLPFC	96.65	96.91	Donor2
