# Supplementary material for: Allele-specific transcription factor binding across human brain regions offers mechanistic insight into eQTLs
Source: HighWire-hosted journal article supplement (doi:10.1101/gr.278601.123), 2024-08-01
Supplement: Supplemental_Table_3.xlsx [file Supplemental_Table_3.xlsx]

## Sheet: Sheet1
Supplemental Table 3: Reproducibility of ASB within each donor and between donors at different p-value thresholds
P-value threshold	Test	Reproducibility
0.05	donor1	0.795841
0.01	donor1	0.857693
0.001	donor1	0.945881
0.0001	donor1	0.980799
1e-05	donor1	0.990134
BH 0.05	donor1	0.974971
0.05	donor2	0.801205
0.01	donor2	0.864934
0.001	donor2	0.937644
0.0001	donor2	0.982003
1e-05	donor2	0.989583
BH 0.05	donor2	0.980105
0.05	between-donor	0.706604
0.01	between-donor	0.817816
0.001	between-donor	0.923365
0.0001	between-donor	0.989529
1e-05	between-donor	0.98939
BH 0.05	between-donor	0.995788
