# Supplementary material for: Allele-specific transcription factor binding across human brain regions offers mechanistic insight into eQTLs
Source: HighWire-hosted journal article supplement (doi:10.1101/gr.278601.123), 2024-08-01
Supplement: Supplemental_Table_5.xlsx [file Supplemental_Table_5.xlsx]

## Sheet: Table5_motifbreakR
Supplemental Table 5: Significant predicted alterations to motifs by ASB variants using motifbreakR
seqnames	pos	SNP_id	REF	ALT	varType	geneSymbol	dataSource	providerName	providerId	seqMatch	pctRef	pctAlt	scoreRef	scoreAlt	effect	altPos	alleleDiff	alleleEffectSize
chr1	75786061	chr1:75786061:T:C	T	C	SNV	OLIG2	jaspar2022	MA0678.1	MA0678.1	ggacaagcaTatggtcgca	0.990426	0.839315	11.3286	9.61117	strong	1	-1.71744	-0.15016
chr22	27409502	chr22:27409502:T:C	T	C	SNV	CTCF	jaspar2022	MA1930.1	MA1930.1	tctgcaagcccgcaagaagcgaccacaagggagCagaggctgactgatccatcaccatcattttcaag	0.575239	0.616323	9.68158	10.3175	weak	1	0.635884	0.0391172
chrX	153521203	chrX:153521203:A:G	A	G	SNV	NFIC	jaspar2022	MA1527.1	MA1527.1	ggctcctcccttccccAccctggctaagctggc	0.485627	0.420911	8.41462	7.30879	strong	1	-1.10583	-0.0642777
chr17	76570053	chr17:76570053:T:C	T	C	SNV	SOX8	jaspar2022	MA0868.2	MA0868.2	aagggcccaTtgtttccgc	0.989058	0.804394	8.92676	7.28945	strong	1	-1.6373	-0.181443
chr7	1170052	chr7:1170052:T:A	T	A	SNV	ZBTB7B	jaspar2022	MA0694.1	MA0694.1	accctggcagcAccccctggcgg	0.677529	0.783605	8.46715	9.76695	strong	1	1.2998	0.104666
chr17	15699586	chr17:15699586:T:G	T	G	SNV	CTCF	jaspar2022	MA0139.1	MA0139.1	gacggagctcttcgatcgGccgattctcccagccgca	0.49098	0.566498	6.88871	7.90772	strong	1	1.01901	0.0740709
chr6	47414277	chr6:47414277:C:G	C	G	SNV	CTCF	jaspar2022	MA0139.1	MA0139.1	cctatataccacagttttCagtcaagtattcttacct	0.547971	0.48452	7.65773	6.80155	strong	1	-0.856183	-0.0622352
chr10	22615974	chr10:22615974:G:A	G	A	SNV	SP1	jaspar2022	MA0079.5	MA0079.5	tttatgccGtgccagtc	0.604064	0.541312	8.01903	7.19034	strong	1	-0.828693	-0.0625538
chr11	128893278	chr11:128893278:C:T	C	T	SNV	NEUROD1	jaspar2022	MA1109.1	MA1109.1	cctggggcacagCgtatgtgcttct	0.634595	0.591699	7.07712	6.60858	weak	1	-0.46854	-0.0423314
chr18	3910668	chr18:3910668:T:C	T	C	SNV	NEUROD1	jaspar2022	MA1109.1	MA1109.1	atcattgccatcTgctagtgcctgc	0.98362	0.819353	10.8895	9.0952	strong	1	-1.79426	-0.162107
chr9	18346980	chr9:18346980:T:A	T	A	SNV	SOX8	jaspar2022	MA0868.2	MA0868.2	attccgagaAtaataaagc	0.711129	0.817735	6.46253	7.40774	strong	1	0.945207	0.104746
chr11	56950711	chr11:56950711:G:T	G	T	SNV	CTCF	jaspar2022	MA0139.1	MA0139.1	gcaaaaaatctccagtagGgggggttgagtacacaag	0.889673	0.846846	12.2685	11.6906	weak	1	-0.577891	-0.0420064
chr9	124217296	chr9:124217296:G:C	G	C	SNV	NR2F2	jaspar2022	MA1111.1	MA1111.1	cacacacagaCagagagagag	0.410606	0.52812	4.33644	5.5381	strong	1	1.20166	0.115952
chr10	133396851	chr10:133396851:A:G	A	G	SNV	CTCF	jaspar2022	MA1930.1	MA1930.1	ccttctgttatgcccagacagggccaccagaggGctccttggtctagcggtaacgccagtgtctggga	0.828422	0.880887	13.6002	14.4123	strong	1	0.812034	0.0499533
chr4	44678340	chr4:44678340:C:G	C	G	SNV	CREM	jaspar2022	MA0609.2	MA0609.2	tgcgttttagggagtCaatcgaaagcctcca	0.585788	0.540607	5.96626	5.53295	weak	1	-0.43331	-0.0435978
chr9	95743825	chr9:95743825:C:G	C	G	SNV	NFIC	jaspar2022	MA0161.2	MA0161.2	tttccatttgGccctatgcca	0.601131	0.758733	5.931	7.4379	strong	1	1.50689	0.154637
chr2	199955782	chr2:199955782:T:G	T	G	SNV	NR2F1	jaspar2022	MA0017.2	MA0017.2	ggcaggcaccggGgtgaagggtcat	0.60761	0.773369	7.39137	9.36114	strong	1	1.96977	0.163408
chr10	61452339	chr10:61452339:T:C	T	C	SNV	NFIC	jaspar2022	MA0161.2	MA0161.2	ggcgctgtgcCagagaacgcg	0.580553	0.725303	5.73425	7.11825	strong	1	1.384	0.142026
chr19	34233214	chr19:34233214:A:C	A	C	SNV	NFIC	jaspar2022	MA1527.1	MA1527.1	ccgagagcagacagcaAggaacggcagggccca	0.608025	0.501628	10.5061	8.68803	strong	1	-1.81804	-0.105676
chr17	45585313	chr17:45585313:A:C	A	C	SNV	CTCF	jaspar2022	MA0139.1	MA0139.1	ccggggctgggcgcagcgAggcgcggctggactccgg	0.609768	0.571387	8.49159	7.9737	weak	1	-0.517899	-0.0376457
chr15	67840056	chr15:67840056:C:T	C	T	SNV	ZNF24	jaspar2022	MA1124.1	MA1124.1	acggtgtttcgtTctttccacaaga	0.613198	0.722982	9.74894	11.4326	strong	1	1.6837	0.107371
chr1	20480580	chr1:20480580:G:T	G	T	SNV	NEUROD1	jaspar2022	MA1109.1	MA1109.1	agagccgacaggTcctcaaaccaac	0.569595	0.638801	6.36713	7.12306	strong	1	0.755934	0.0682967
chr6	29705829	chr6:29705829:C:T	C	T	SNV	CTCF	jaspar2022	MA0139.1	MA0139.1	catatccccagcagatggCagagaagacatttcaatt	0.92284	0.864793	12.716	11.9328	strong	1	-0.783266	-0.056935
chr3	148018877	chr3:148018877:A:G	A	G	SNV	NR2F1	jaspar2022	MA1537.1	MA1537.1	tggatcatgcctgtGatcccagcactttg	0.587994	0.659574	10.954	12.2803	strong	1	1.32633	0.0713535
chr9	63817506	chr9:63817506:C:T	C	T	SNV	ZEB1	jaspar2022	MA0103.3	MA0103.3	gtagacagccCacctccctgt	0.840685	0.691807	8.7925	7.25017	strong	1	-1.54233	-0.147691
chr5	88883253	chr5:88883253:A:G	A	G	SNV	MEF2A	jaspar2022	MA0052.4	MA0052.4	ggggagcgcgcgcgAgggggggggcgcgg	0.24444	0.106823	2.79208	1.39138	strong	1	-1.4007	-0.133625
chr5	163379819	chr5:163379819:G:T	G	T	SNV	SOX8	jaspar2022	MA0868.2	MA0868.2	acaatgaatGtactgagtt	0.730744	0.590994	6.63645	5.39737	strong	1	-1.23908	-0.137313
chr14	71468882	chr14:71468882:C:T	C	T	SNV	NR3C1	jaspar2022	MA0113.3	MA0113.3	acgagcttgttatgttCtttgttctcttgtagg	0.642199	0.528264	11.0885	9.14284	strong	1	-1.94566	-0.113129
chr3	159971612	chr3:159971612:T:C	T	C	SNV	NFIC	jaspar2022	MA0161.2	MA0161.2	taaggtgcaaTtggttgtggg	0.622852	0.560946	6.13868	5.54678	weak	1	-0.591906	-0.0607411
chr5	180313827	chr5:180313827:T:C	T	C	SNV	REST	jaspar2022	MA0138.2	MA0138.2	cttggtgctggccacgccgaTctccggccctgcgttgatgt	0.600601	0.539987	12.3981	11.1906	strong	1	-1.20748	-0.0593225
chr19	47256616	chr19:47256616:T:G	T	G	SNV	CREB1	jaspar2022	MA0018.4	MA0018.4	ggacaggtgaccTgggggagggggc	0.667459	0.533535	6.96233	5.61584	strong	1	-1.34649	-0.130654
chr2	119476327	chr2:119476327:G:C	G	C	SNV	CTCF	jaspar2022	MA0139.1	MA0139.1	cacccacccccaggctggCtatgaacaacgtggcccc	0.672945	0.702838	9.34407	9.74744	weak	1	0.40337	0.0293206
chrX	85003837	chrX:85003837:C:G	C	G	SNV	NFIC	jaspar2022	MA1527.1	MA1527.1	acggggtggggctgtcCtaagggaagcctagtc	0.636937	0.593237	11.0001	10.2534	strong	1	-0.746721	-0.0434042
chr19	16472126	chr19:16472126:C:A	C	A	SNV	ZBTB7B	jaspar2022	MA0694.1	MA0694.1	ggcggggccgcCcacacgcagcc	0.752148	0.592724	9.3815	7.42798	strong	1	-1.95351	-0.157306
chr16	3432002	chr16:3432002:G:T	G	T	SNV	NR2F2	jaspar2022	MA1111.1	MA1111.1	tgtagcgcaaGtcatctcgtt	0.758	0.634508	7.88876	6.62598	strong	1	-1.26278	-0.121851
chr16	28846324	chr16:28846324:A:G	A	G	SNV	SP4	jaspar2022	MA0685.2	MA0685.2	acagaagaGgaagggcg	0.567675	0.662404	7.41785	8.65275	strong	1	1.2349	0.0946016
chr3	197547814	chr3:197547814:C:T	C	T	SNV	MEF2A	jaspar2022	MA0052.4	MA0052.4	gaactccttgcccaTgtgagggcgttcct	0.457856	0.50827	4.96427	5.47739	weak	1	0.513125	0.0489514
chr1	84770154	chr1:84770154:C:T	C	T	SNV	NFIC	jaspar2022	MA1527.1	MA1527.1	tactcttggccctttgCcaatctgcaagatgga	0.996637	0.883646	17.1464	15.2157	strong	1	-1.93071	-0.112226
chr19	58055386	chr19:58055386:C:G	C	G	SNV	RELB	jaspar2022	MA1117.1	MA1117.1	cccctaaccgGgcctccggac	0.468551	0.581964	4.32964	5.31938	strong	1	0.989743	0.110369
chr7	56064217	chr7:56064217:C:G	C	G	SNV	NFIC	jaspar2022	MA1527.1	MA1527.1	cgggtggtggcgcagcGtgcgcatgtgcatagg	0.528869	0.586424	9.1535	10.137	strong	1	0.983456	0.0571648
chrX	55160988	chrX:55160988:G:A	G	A	SNV	NR2F1	jaspar2022	MA1537.1	MA1537.1	cctgcaggtcatgaGagccgagcgccacc	0.578859	0.487913	10.7847	9.09954	strong	1	-1.68516	-0.0906578
chrX	15335567	chrX:15335567:T:C	T	C	SNV	MEF2A	jaspar2022	MA0052.4	MA0052.4	tccctccctgctgtTccgcagcaccaatc	0.479302	0.412694	5.18256	4.5046	weak	1	-0.677958	-0.0646762
chr20	47205863	chr20:47205863:A:G	A	G	SNV	CTCF	jaspar2022	MA0139.1	MA0139.1	tgcctatggccaccagatGgcgagcttgctggactgc	0.815966	0.945906	11.2739	13.0273	strong	1	1.75334	0.127449
chr22	45532780	chr22:45532780:T:C	T	C	SNV	NR2F1	jaspar2022	MA1538.1	MA1538.1	gagctcttctctgcCtcgccccttccagg	0.440549	0.517969	7.2769	8.52755	strong	1	1.25066	0.0766598
chr22	43237506	chr22:43237506:G:A	G	A	SNV	RELB	jaspar2022	MA1117.1	MA1117.1	gtcatgtggcGaggactcaga	0.732866	0.589236	6.6363	5.38285	strong	1	-1.25345	-0.139776
chr17	17844699	chr17:17844699:A:G	A	G	SNV	OLIG2	jaspar2022	MA0678.1	MA0678.1	catggtgccAggggcccaa	0.473742	0.337089	5.45629	3.90317	strong	1	-1.55312	-0.135792
chr11	74674101	chr11:74674101:C:T	C	T	SNV	SP1	jaspar2022	MA0079.5	MA0079.5	actcaacaCctgtgaaa	0.62041	0.472847	8.2349	6.28621	strong	1	-1.94869	-0.147097
chr10	126128595	chr10:126128595:T:A	T	A	SNV	NR2F1	jaspar2022	MA1538.1	MA1538.1	gtgtgtggtgcgcgAgtgggaatgtgtgc	0.431083	0.513348	7.12399	8.45292	strong	1	1.32893	0.0814577
chr12	131454915	chr12:131454915:A:G	A	G	SNV	CTCF	jaspar2022	MA1930.1	MA1930.1	cacctgccccccttgtggccatgcagggcatacGcagcccggccatgcagcagctcccagccactcct	0.790281	0.842414	13.0099	13.8168	strong	1	0.806892	0.049637
chr9	40992221	chr9:40992221:A:G	A	G	SNV	MEIS2	jaspar2022	MA1640.1	MA1640.1	cctctgcagccgccAtagctccccagcag	0.656983	0.541901	6.93303	5.76376	strong	1	-1.16926	-0.112233
chr1	121750217	chr1:121750217:G:A	G	A	SNV	ZNF24	jaspar2022	MA1124.1	MA1124.1	ttgaggtcaacgAtagaataggaaa	0.512305	0.622088	8.20159	9.88529	strong	1	1.6837	0.107371
chr10	100351144	chr10:100351144:G:C	G	C	SNV	CLOCK	jaspar2022	MA0819.2	MA0819.2	cattgttaaCagtttctat	0.505075	0.562522	4.95148	5.50798	weak	1	0.556504	0.0571014
chr1	89085986	chr1:89085986:G:C	G	C	SNV	CTCF	jaspar2022	MA1930.1	MA1930.1	atatggaggaaaagcatggtgtcaccactagagGgaggtgctgtcatatcacatatggaaagcaactt	0.780829	0.676067	12.8636	11.2421	strong	1	-1.62147	-0.0997467
chr7	59590	chr7:59590:G:C	G	C	SNV	NFIC	jaspar2022	MA0161.2	MA0161.2	gccttcctggCacttctccac	0.710976	0.856022	6.98126	8.36811	strong	1	1.38685	0.142318
chr1	121750208	chr1:121750208:A:T	A	T	SNV	SOX8	jaspar2022	MA0868.2	MA0868.2	gccgctttgTggtcaacgg	0.62971	0.819734	5.74064	7.42547	strong	1	1.68483	0.18671
chr6	168895209	chr6:168895209:G:A	G	A	SNV	CTCF	jaspar2022	MA1929.1	MA1929.1	tcctggcacagtgtccaggcttggccacgagggGgcacttgaaacctgcctttcggtgcctggtcgt	0.716697	0.612584	9.98245	8.65111	strong	1	-1.33134	-0.0978552
chrX	119853214	chrX:119853214:T:C	T	C	SNV	SOX8	jaspar2022	MA0868.2	MA0868.2	cattagcaaTtccgccatc	0.75716	0.63931	6.87066	5.82576	strong	1	-1.0449	-0.115794
chr22	19632325	chr22:19632325:G:A	G	A	SNV	CTCF	jaspar2022	MA0139.1	MA0139.1	tcctttgtccgccttgcaGggtgtgggatgggggtgt	0.632014	0.585496	8.79178	8.16408	weak	1	-0.627699	-0.0456269
chr9	109235090	chr9:109235090:T:G	T	G	SNV	NFIC	jaspar2022	MA1527.1	MA1527.1	catctcaccaattcttGactctatgccaattct	0.764847	0.881632	13.1857	15.1813	strong	1	1.99554	0.115994
chr16	12228951	chr16:12228951:C:T	C	T	SNV	SOX8	jaspar2022	MA0868.2	MA0868.2	tgactcctgTtgctctccc	0.489161	0.676465	4.49448	6.15519	strong	1	1.66071	0.184037
chr19	53520703	chr19:53520703:A:G	A	G	SNV	CREB1	jaspar2022	MA0018.4	MA0018.4	gggcatggctccAttagggccgtgt	0.706549	0.561396	7.35535	5.89596	strong	1	-1.45939	-0.14161
chr2	48727766	chr2:48727766:T:C	T	C	SNV	CTCF	jaspar2022	MA1930.1	MA1930.1	ttggtgagtagtctcacttccctggctacactgCcatctcatggtggacatttatattttatctcttc	0.625658	0.678123	10.4619	11.274	strong	1	0.812034	0.0499533
chr20	7031431	chr20:7031431:C:A	C	A	SNV	CTCF	jaspar2022	MA1930.1	MA1930.1	ctttgcttgaaagtcttagttcctgtgtctgccAacaggggtcactcctcctgaaggcaaagccaaaa	0.633015	0.669077	10.5758	11.134	weak	1	0.558151	0.0343354
chr19	588305	chr19:588305:A:C	A	C	SNV	CLOCK	jaspar2022	MA0819.2	MA0819.2	ctgccaggcAtgggcggtt	0.689771	0.525451	6.74066	5.14886	strong	1	-1.5918	-0.16333
chr3	188578740	chr3:188578740:C:G	C	G	SNV	NR3C1	jaspar2022	MA0113.3	MA0113.3	atccgtccgaccctctGtccccgtggtgcactg	0.608614	0.725138	10.515	12.5049	strong	1	1.98987	0.115699
chr7	92624785	chr7:92624785:T:C	T	C	SNV	NFIC	jaspar2022	MA1527.1	MA1527.1	gcatgaatgttgtatcTggcctagtgccaagtg	0.973484	0.858341	16.7508	14.7833	strong	1	-1.96749	-0.114363
chr10	13352725	chr10:13352725:G:A	G	A	SNV	CTCF	jaspar2022	MA1929.1	MA1929.1	gtcagtgtctcagagacaggactgccctctgccGgtcccaggctggtccctgcctgtaccctgactt	0.641793	0.602405	9.02461	8.52094	weak	1	-0.50367	-0.0370205
chr18	61582022	chr18:61582022:C:T	C	T	SNV	NFIC	jaspar2022	MA0161.2	MA0161.2	gtctctctttTggccaccaga	0.61736	0.758515	6.08617	7.43581	strong	1	1.34964	0.138499
chr2	109379771	chr2:109379771:C:T	C	T	SNV	MEF2A	jaspar2022	MA0052.4	MA0052.4	tttgtaaagccctcTtgcaggtgaagccc	0.398299	0.520474	4.35809	5.60161	strong	1	1.24353	0.118631
chr7	36484046	chr7:36484046:C:A	C	A	SNV	CTCF	jaspar2022	MA0139.1	MA0139.1	ggtcagtgttcactagccCttttgtttcctttctgtg	0.585457	0.536911	8.16355	7.50849	weak	1	-0.65506	-0.0476158
chr18	9334517	chr18:9334517:G:T	G	T	SNV	SP4	jaspar2022	MA0685.2	MA0685.2	ggcgggcgGgagcctgc	0.814595	0.712806	10.6367	9.3098	strong	1	-1.32693	-0.101651
chr8	48192284	chr8:48192284:T:C	T	C	SNV	ATF7	jaspar2022	MA0834.1	MA0834.1	ggctggagcatgaCggtctcactgcca	0.610421	0.681006	9.92436	11.0654	strong	1	1.14105	0.0703393
chr19	53554523	chr19:53554523:C:G	C	G	SNV	NR2F1	jaspar2022	MA1538.1	MA1538.1	gcctccatgggtggGgggaccgactgtgt	0.539099	0.6261	8.8689	10.2743	strong	1	1.40543	0.0861466
chr5	128736851	chr5:128736851:A:G	A	G	SNV	NEUROD1	jaspar2022	MA1109.1	MA1109.1	gtcattccaacaGagccaggctcag	0.532023	0.696098	5.95674	7.7489	strong	1	1.79216	0.161917
chr18	9334517	chr18:9334517:G:T	G	T	SNV	SP1	jaspar2022	MA0079.5	MA0079.5	ggcgggcgGgagcctgc	0.809717	0.702638	10.7348	9.32078	strong	1	-1.41406	-0.10674
chr16	2842769	chr16:2842769:G:A	G	A	SNV	NFIC	jaspar2022	MA1527.1	MA1527.1	caagagagtttccggcAgacttcctgtgcgatc	0.623161	0.647665	10.7647	11.1834	weak	1	0.418704	0.0243378
chr16	9160304	chr16:9160304:G:A	G	A	SNV	CTCF	jaspar2022	MA0139.1	MA0139.1	ccaattcagccagcagggGgcagcaggggatcgccgt	0.96334	0.8334	13.2625	11.5092	strong	1	-1.75334	-0.127449
chr13	110915159	chr13:110915159:G:A	G	A	SNV	NR2F1	jaspar2022	MA1537.1	MA1537.1	gggcaggggtcgggAcctggagccgcgga	0.534388	0.610845	9.96068	11.3774	strong	1	1.41669	0.0762149
chr11	18412293	chr11:18412293:C:T	C	T	SNV	CTCF	jaspar2022	MA1930.1	MA1930.1	ggggggcggagcttgcgtgctgacgcataagagCcgagcgggggaacgtgcgtgtctcgagtcgcacg	0.672816	0.626046	11.1918	10.4679	strong	1	-0.723884	-0.0445307
chr19	42831780	chr19:42831780:T:C	T	C	SNV	SOX8	jaspar2022	MA0868.2	MA0868.2	tagtgcactTgtttatgtc	0.848783	0.638433	7.68302	5.81798	strong	1	-1.86504	-0.206681
chr16	2005819	chr16:2005819:G:A	G	A	SNV	MAZ	jaspar2022	MA1522.1	MA1522.1	tgccgcctggAggcacccatg	0.565715	0.705479	7.60753	9.46645	strong	1	1.85892	0.138894
chr17	794936	chr17:794936:A:G	A	G	SNV	NFIC	jaspar2022	MA0161.2	MA0161.2	gccgagagacAaacattgtca	0.604968	0.463813	5.96769	4.61805	strong	1	-1.34964	-0.138499
chr4	1222503	chr4:1222503:G:T	G	T	SNV	NR2F1	jaspar2022	MA0017.2	MA0017.2	ggccagtgcaggTcagaacgcccat	0.730305	0.89858	8.84939	10.8491	strong	1	1.99967	0.165889
chr17	68457800	chr17:68457800:C:A	C	A	SNV	ZNF24	jaspar2022	MA1124.1	MA1124.1	ctggcttcgtaaAgcggctctccat	0.376646	0.463688	6.12105	7.45597	strong	1	1.33492	0.0851289
chr4	37802312	chr4:37802312:C:A	C	A	SNV	CTCF	jaspar2022	MA1930.1	MA1930.1	agcatttttccactgcaccacactgcctcccagCtacctggtgataaaaagcaaggcatgccaaccaa	0.714616	0.66433	11.8388	11.0605	strong	1	-0.778301	-0.0478782
chr4	7068348	chr4:7068348:G:T	G	T	SNV	SP4	jaspar2022	MA0685.2	MA0685.2	cagcgccgGggtggggc	0.937757	0.78827	12.2423	10.2936	strong	1	-1.94873	-0.149286
chr5	109409991	chr5:109409991:G:T	G	T	SNV	SP1	jaspar2022	MA0079.5	MA0079.5	cggaagcaGaggcggtg	0.818986	0.702887	10.8572	9.32406	strong	1	-1.53318	-0.115732
chr1	225481080	chr1:225481080:C:T	C	T	SNV	CTCF	jaspar2022	MA1930.1	MA1930.1	ccctgctggctccctctgttcctgagtgcagttTccatggggccctgtgtggggcactgtcctcctcc	0.643444	0.67606	10.7372	11.2421	weak	1	0.504825	0.031055
chr3	186930256	chr3:186930256:G:A	G	A	SNV	CTCF	jaspar2022	MA0139.1	MA0139.1	ccctcgcggccaagcgggGaagaggcatttaggggtc	0.698225	0.637634	9.68519	8.8676	strong	1	-0.81759	-0.05943
chr7	75572587	chr7:75572587:C:A	C	A	SNV	SP1	jaspar2022	MA0079.5	MA0079.5	tgccactgCcatcatgc	0.589373	0.501592	7.82502	6.6658	strong	1	-1.15921	-0.0875032
chr2	84971016	chr2:84971016:C:T	C	T	SNV	MEF2A	jaspar2022	MA0052.4	MA0052.4	agaggcggggctggTgtgcgggcggcgga	0.331266	0.451672	3.67581	4.90133	strong	1	1.22552	0.116913
chr12	59596986	chr12:59596986:T:C	T	C	SNV	MEF2A	jaspar2022	MA0052.4	MA0052.4	gccactgcaccacaTtgggggcgccaggc	0.487677	0.412294	5.2678	4.50053	strong	1	-0.767268	-0.0731963
chr12	24565391	chr12:24565391:A:G	A	G	SNV	NFIC	jaspar2022	MA0161.2	MA0161.2	ctggcacctgGccagtaggtt	0.701553	0.745053	6.89118	7.3071	weak	1	0.415919	0.0426814
chr16	3364937	chr16:3364937:C:T	C	T	SNV	PKNOX1	jaspar2022	MA0782.2	MA0782.2	tgacgcaaggcgggTttcattaatgaaat	0.586008	0.674131	6.46374	7.38884	strong	1	0.925097	0.0855799
chr2	116511637	chr2:116511637:C:T	C	T	SNV	NFIC	jaspar2022	MA0161.2	MA0161.2	ttatttttatTggctggatgc	0.620789	0.761944	6.11896	7.4686	strong	1	1.34964	0.138499
chr2	10013066	chr2:10013066:T:G	T	G	SNV	NR2F1	jaspar2022	MA0017.2	MA0017.2	ggtgggcaggggGgcatatgggcgg	0.595223	0.763497	7.24417	9.24383	strong	1	1.99967	0.165889
chr16	3365063	chr16:3365063:C:T	C	T	SNV	EGR1	jaspar2022	MA0162.4	MA0162.4	cgcatgcctctggCcctcttgaggtcc	0.668407	0.50743	6.96114	5.3588	strong	1	-1.60234	-0.156147
chr9	40992220	chr9:40992220:C:T	C	T	SNV	SRF	jaspar2022	MA0083.3	MA0083.3	gccctctgcagccgcCatagctccccagcag	0.562808	0.541541	10.8548	10.452	weak	1	-0.402843	-0.0210514
chr10	65907452	chr10:65907452:C:T	C	T	SNV	NFIC	jaspar2022	MA1527.1	MA1527.1	accagcaagctcctgcCgattcttcggatgtcc	0.503265	0.401769	8.71599	6.9817	strong	1	-1.73429	-0.100808
chr1	1746440	chr1:1746440:A:G	A	G	SNV	SP1	jaspar2022	MA0079.5	MA0079.5	ggggggggGaccgtggc	0.868978	0.937248	11.5174	12.419	strong	1	0.901556	0.0680539
chr1	6245243	chr1:6245243:C:A	C	A	SNV	SP1	jaspar2022	MA0079.5	MA0079.5	gagagcgcCgccggcag	0.697884	0.611507	9.258	8.11732	strong	1	-1.14067	-0.0861036
chr16	31033362	chr16:31033362:A:G	A	G	SNV	NR2F2	jaspar2022	MA1111.1	MA1111.1	cgtacaaatgAcgtattccta	0.769274	0.605411	8.00404	6.32845	strong	1	-1.67559	-0.161684
chr7	82173599	chr7:82173599:G:A	G	A	SNV	CTCF	jaspar2022	MA0139.1	MA0139.1	tagagtcaacagtcactgGgtggtgctacaaaccagc	0.740505	0.608115	10.2557	8.46928	strong	1	-1.78641	-0.129853
chr1	143195063	chr1:143195063:C:A	C	A	SNV	ZNF384	jaspar2022	MA1125.1	MA1125.1	aagagaatcatAgaatggactcg	0.48885	0.641846	6.1485	8.02333	strong	1	1.87483	0.151048
chr2	90291373	chr2:90291373:G:C	G	C	SNV	KLF16	jaspar2022	MA0741.1	MA0741.1	agccagccacCcagtcagccc	0.641936	0.677451	7.36456	7.76536	weak	1	0.400792	0.0351407
chr22	49918577	chr22:49918577:T:C	T	C	SNV	CREB1	jaspar2022	MA0018.4	MA0018.4	cggattgggccaCatcaggccgggg	0.585815	0.718587	6.14148	7.47638	strong	1	1.3349	0.12953
chr3	47522280	chr3:47522280:G:A	G	A	SNV	CTCF	jaspar2022	MA1930.1	MA1930.1	agccttgggttatctccagcacacccaccagagGgcagcagacactggctaaagctcttagtcataag	0.770368	0.667651	12.7017	11.1119	strong	1	-1.5898	-0.0977989
chr21	39386047	chr21:39386047:T:G	T	G	SNV	ZNF24	jaspar2022	MA1124.1	MA1124.1	aggcccttcctcTcaatccgagctt	0.601853	0.491341	9.57495	7.88007	strong	1	-1.69488	-0.108084
chrX	55160988	chrX:55160988:G:A	G	A	SNV	NR2F1	jaspar2022	MA0017.2	MA0017.2	tgcaggtcatgaGagccgagcgcca	0.947742	0.903829	11.4333	10.9114	weak	1	-0.521834	-0.0432903
chr5	122943523	chr5:122943523:G:C	G	C	SNV	MITF	jaspar2022	MA0620.3	MA0620.3	ctgctgttccatctcacGtgaggctcggggccctc	0.945224	0.874825	10.7037	9.92245	strong	1	-0.781296	-0.06907
chr2	203581026	chr2:203581026:C:T	C	T	SNV	SOX8	jaspar2022	MA0868.2	MA0868.2	ctggaagcaTgtgcagctg	0.483798	0.605095	4.44693	5.52239	strong	1	1.07546	0.119181
chr10	1702683	chr10:1702683:G:A	G	A	SNV	SRF	jaspar2022	MA0083.3	MA0083.3	cccccattccccaggAtacatgctcctgccg	0.490352	0.537585	9.48238	10.3771	strong	1	0.89468	0.0467533
chr1	235329231	chr1:235329231:T:G	T	G	SNV	ZKSCAN1	jaspar2022	MA1585.1	MA1585.1	tgaaaagtcGtttgcatgg	0.524376	0.664892	6.68882	8.44321	strong	1	1.75439	0.138938
chr12	4701943	chr12:4701943:T:C	T	C	SNV	CLOCK	jaspar2022	MA0819.2	MA0819.2	ccagagagaCagaagtatg	0.530368	0.586376	5.19649	5.73905	weak	1	0.542558	0.0556704
chr10	110497804	chr10:110497804:C:T	C	T	SNV	SRF	jaspar2022	MA0083.3	MA0083.3	tgcagggcgtggccaTggcccgaggggcggg	0.429657	0.510809	8.33268	9.86988	strong	1	1.5372	0.0803297
chr18	25727797	chr18:25727797:T:G	T	G	SNV	NFIC	jaspar2022	MA1527.1	MA1527.1	tgacttctggccaactGccaagaaagcatctct	0.86628	0.971982	14.9189	16.7251	strong	1	1.80617	0.104986
chr15	33226761	chr15:33226761:T:C	T	C	SNV	NFIC	jaspar2022	MA0161.2	MA0161.2	tggcctcaggCcaatttttca	0.603721	0.759841	5.95576	7.44849	strong	1	1.49273	0.153183
chr1	46340757	chr1:46340757:A:T	A	T	SNV	SOX8	jaspar2022	MA0868.2	MA0868.2	gtggcgctcAccacctccc	0.56288	0.461976	5.1481	4.25345	strong	1	-0.894647	-0.0991433
chr5	127834144	chr5:127834144:A:G	A	G	SNV	CTCF	jaspar2022	MA1930.1	MA1930.1	gcccaaataacagaagttaatcaccagagatgtGcctagacccttatcagcccagagatggcactaga	0.716756	0.820612	11.8719	13.4794	strong	1	1.60745	0.0988842
chr13	20489385	chr13:20489385:A:G	A	G	SNV	CTCF	jaspar2022	MA1930.1	MA1930.1	ccagtgtccttcactcacctgaatgtgcatggcGccctctactgcttcttggatattgggacaaccac	0.745845	0.773448	12.3222	12.7494	weak	1	0.427214	0.0262806
chr13	31192585	chr13:31192585:G:A	G	A	SNV	OLIG2	jaspar2022	MA0678.1	MA0678.1	tggagggtcAcccgcactg	0.383218	0.443491	4.42744	5.11247	weak	1	0.685025	0.0598933
chr19	48993574	chr19:48993574:A:G	A	G	SNV	NR2F1	jaspar2022	MA1537.1	MA1537.1	tggggaggaggaggAgggtgggataaaga	0.567831	0.519049	10.5803	9.67646	strong	1	-0.903886	-0.048627
chr2	231017382	chr2:231017382:A:G	A	G	SNV	SOX8	jaspar2022	MA0868.2	MA0868.2	cacgggtacAatgggactt	0.94069	0.725399	8.49791	6.58905	strong	1	-1.90886	-0.211536
chr2	225002649	chr2:225002649:A:G	A	G	SNV	MEF2A	jaspar2022	MA0052.4	MA0052.4	tgccacgaggagctAgttgcatgggcagg	0.674697	0.533491	7.17133	5.7341	strong	1	-1.43723	-0.13711
chr6	3485197	chr6:3485197:C:T	C	T	SNV	NR3C1	jaspar2022	MA0113.3	MA0113.3	ctgttctaaaacaatgTcacccaaagaggatgc	0.525872	0.62104	9.102	10.7272	strong	1	1.62518	0.0944948
chr1	121750216	chr1:121750216:G:A	G	A	SNV	ZNF24	jaspar2022	MA1124.1	MA1124.1	tttgaggtcaacGgtagaataggaa	0.512305	0.441212	8.20159	7.11127	strong	1	-1.09031	-0.0695303
chr13	111241066	chr13:111241066:C:T	C	T	SNV	NEUROD1	jaspar2022	MA1109.1	MA1109.1	tgtgctctgaggTgggcagcatagg	0.577561	0.69919	6.45414	7.78268	strong	1	1.32854	0.12003
chr17	7280727	chr17:7280727:G:A	G	A	SNV	CTCF	jaspar2022	MA1929.1	MA1929.1	tgcaatccactgcggctcctcgctcgccctccaGgtggcagcacaaccctgcgcttccgaagcccgt	0.907706	0.792799	12.4249	10.9556	strong	1	-1.46935	-0.108
chr21	10691782	chr21:10691782:T:C	T	C	SNV	MEF2A	jaspar2022	MA0052.4	MA0052.4	actccagtccaatcTattccattcgaatc	0.630288	0.539413	6.71932	5.79438	strong	1	-0.924944	-0.0882384
chr16	813838	chr16:813838:G:A	G	A	SNV	BHLHE40	jaspar2022	MA0464.2	MA0464.2	gtcaccaccAggtggagcc	0.648435	0.783312	7.6572	9.2312	strong	1	1.574	0.133844
chr1	39899157	chr1:39899157:C:A	C	A	SNV	OLIG2	jaspar2022	MA0678.1	MA0678.1	ccctagcccAtattgggtg	0.649612	0.784627	7.45512	8.98962	strong	1	1.5345	0.134165
chr19	21359410	chr19:21359410:C:G	C	G	SNV	CTCF	jaspar2022	MA0139.1	MA0139.1	atctctgcacccgcagcgGcgcttctctaccggattg	0.571632	0.670328	7.977	9.30877	strong	1	1.33177	0.0968051
chrX	15335567	chrX:15335567:T:C	T	C	SNV	GATA4	jaspar2022	MA0482.2	MA0482.2	ctccctgctgtTccgcagcacca	0.592078	0.54896	5.95835	5.54037	weak	1	-0.417982	-0.0421662
chr17	22139547	chr17:22139547:A:G	A	G	SNV	CREB1	jaspar2022	MA0018.4	MA0018.4	cttcagttctttAtgtagagtagag	0.593817	0.528854	6.22193	5.56878	weak	1	-0.653148	-0.063377
chr4	92581104	chr4:92581104:A:G	A	G	SNV	SOX8	jaspar2022	MA0868.2	MA0868.2	gattcagtaAgaagagatg	0.692331	0.544056	6.29587	4.9812	strong	1	-1.31467	-0.145689
chr20	48574695	chr20:48574695:G:A	G	A	SNV	CTCF	jaspar2022	MA0139.1	MA0139.1	aggtgcctgccatctgctGgggtggctgagctgggat	0.909551	0.770947	12.5367	10.6665	strong	1	-1.87027	-0.135949
chr7	128347725	chr7:128347725:G:C	G	C	SNV	SOX8	jaspar2022	MA0868.2	MA0868.2	aatctaactGtgtctctat	0.714723	0.635916	6.4944	5.79566	weak	1	-0.698738	-0.077433
chr7	142459652	chr7:142459652:C:T	C	T	SNV	CTCF	jaspar2022	MA0139.1	MA0139.1	aacttcacttattggccaCaagatggcactgtggtcc	0.951836	0.920998	13.1073	12.6912	weak	1	-0.416114	-0.030247
chr14	51029082	chr14:51029082:T:C	T	C	SNV	SRF	jaspar2022	MA0083.3	MA0083.3	gcccaagctgctgagTgtgcccaggcagaag	0.429439	0.400837	8.32855	7.78678	weak	1	-0.541771	-0.0283113
chr6	71560451	chr6:71560451:T:C	T	C	SNV	NFIB	jaspar2022	MA1643.1	MA1643.1	agtttcaatttggcagtgtgCcagagcagcttgcatcacag	0.829017	0.943944	13.9017	15.7778	strong	1	1.87613	0.112391
chrX	135052279	chrX:135052279:A:G	A	G	SNV	ATF7	jaspar2022	MA0834.1	MA0834.1	aagacttgtggtcActagtgcgctggt	0.665852	0.544948	10.8204	8.86595	strong	1	-1.95448	-0.120483
chr19	43774629	chr19:43774629:G:A	G	A	SNV	CTCF	jaspar2022	MA1929.1	MA1929.1	cagcccgttgtcggtcatgaacagctgccggtaGggggccaagaagggaggggtcaggagcaggtca	0.674687	0.594748	9.44524	8.42303	strong	1	-1.02221	-0.0751339
chr1	109241026	chr1:109241026:T:C	T	C	SNV	SP1	jaspar2022	MA0079.5	MA0079.5	gagccctcCccggcggg	0.730424	0.875661	9.6877	11.6057	strong	1	1.91798	0.144779
chr14	55425299	chr14:55425299:C:T	C	T	SNV	CTCF	jaspar2022	MA1930.1	MA1930.1	actaaccacttcccaacactggggagaccatgaCactagggggagccctgaaaaaccctccagggcta	0.751239	0.638054	12.4056	10.6538	strong	1	-1.75184	-0.107767
chrX	119791742	chrX:119791742:C:T	C	T	SNV	CTCF	jaspar2022	MA1930.1	MA1930.1	ttctagtgccttctctgtctagcggtgcgctccTgtggcgccgtgggaaagcgcgctggtttctgcca	0.587012	0.627898	9.8638	10.4966	weak	1	0.632817	0.0389285
chr2	128293335	chr2:128293335:A:G	A	G	SNV	NFIC	jaspar2022	MA1527.1	MA1527.1	cagagcaaggcctgggAatggctaaggctttga	0.52553	0.496466	9.09644	8.59983	weak	1	-0.496617	-0.0288666
chr4	186150103	chr4:186150103:G:A	G	A	SNV	CTCF	jaspar2022	MA0139.1	MA0139.1	ccgccagtattcccagtcGgatatttcaccttcaccc	0.53126	0.486861	7.43225	6.83314	weak	1	-0.599102	-0.0435482
chr11	2591467	chr11:2591467:A:T	A	T	SNV	ZNF24	jaspar2022	MA1124.1	MA1124.1	gcgattgtgccaTccaatgcccagt	0.540293	0.566881	8.63083	9.03859	weak	1	0.407763	0.0260034
chr3	197627986	chr3:197627986:C:A	C	A	SNV	SP1	jaspar2022	MA0079.5	MA0079.5	ctaaggggCggggacgc	1	0.960114	13.2477	12.7209	weak	1	-0.526731	-0.0397602
chr16	75403089	chr16:75403089:A:G	A	G	SNV	CTCF	jaspar2022	MA0139.1	MA0139.1	acaaattgagaaaacagcAgacgccctgaatacccat	0.716385	0.622794	9.93024	8.66736	strong	1	-1.26287	-0.0917971
chr7	141012195	chr7:141012195:G:A	G	A	SNV	CTCF	jaspar2022	MA1930.1	MA1930.1	agattgtgtgtcaaaaaaaaaaaaaaaaaaaaaGcagaggctgatctcaaaccactgtcaacctcaaa	0.506277	0.466172	8.61422	7.99348	weak	1	-0.620734	-0.0381852
chr17	80147371	chr17:80147371:G:T	G	T	SNV	NEUROD1	jaspar2022	MA1109.1	MA1109.1	agggatggagggGgtggtacttcta	0.570064	0.532154	6.37226	5.95817	weak	1	-0.414088	-0.0374118
chr7	44196095	chr7:44196095:A:T	A	T	SNV	NEUROD1	jaspar2022	MA1109.1	MA1109.1	cgatgcagcagaTggcaggtcttgc	0.847637	0.983499	9.40414	10.8881	strong	1	1.484	0.134076
chr19	10654238	chr19:10654238:G:A	G	A	SNV	SP1	jaspar2022	MA0079.5	MA0079.5	ttgggcctGcgtcgagg	0.672334	0.565256	8.92059	7.50653	strong	1	-1.41406	-0.10674
chr3	36170960	chr3:36170960:T:C	T	C	SNV	NFIC	jaspar2022	MA1527.1	MA1527.1	cagtgagccaagatggCgccaccgcactccagc	0.589488	0.704472	10.1893	12.1541	strong	1	1.96477	0.114205
chr9	86044223	chr9:86044223:C:G	C	G	SNV	CTCF	jaspar2022	MA1930.1	MA1930.1	acattgccaaaggcctactggggacaagactgcGcccacgtgagaaccactggcatagctgaataaga	0.621926	0.65384	10.4042	10.8981	weak	1	0.493939	0.0303853
chr15	40807151	chr15:40807151:C:T	C	T	SNV	SP4	jaspar2022	MA0685.2	MA0685.2	acagccacCcggcgcga	0.709034	0.640721	9.26062	8.37009	strong	1	-0.890535	-0.0682209
chr17	7932247	chr17:7932247:A:G	A	G	SNV	TBR1	jaspar2022	MA0802.1	MA0802.1	cgtagggggAggcgtgaga	0.809578	0.717444	9.09284	8.07691	strong	1	-1.01592	-0.0907678
chr10	69836634	chr10:69836634:C:T	C	T	SNV	NEUROD1	jaspar2022	MA1109.1	MA1109.1	aggtacaccaggTagggcactgttg	0.623379	0.712343	6.95461	7.92635	strong	1	0.971741	0.0877943
chrX	990005	chrX:990005:G:C	G	C	SNV	MAZ	jaspar2022	MA1522.1	MA1522.1	gactagacacCttcaagatgg	0.569103	0.69887	7.65259	9.37854	strong	1	1.72595	0.128959
chr15	24773224	chr15:24773224:C:G	C	G	SNV	TBR1	jaspar2022	MA0802.1	MA0802.1	ggccggcagGagccgatcc	0.401472	0.556767	4.59278	6.30517	strong	1	1.71239	0.152994
chr14	38578060	chr14:38578060:T:C	T	C	SNV	NFIC	jaspar2022	MA0161.2	MA0161.2	tggcctctagCcaggaagtgg	0.703443	0.747138	6.90924	7.32703	weak	1	0.417788	0.0428732
chr4	119454675	chr4:119454675:C:T	C	T	SNV	CREB1	jaspar2022	MA0018.4	MA0018.4	gcgaaggcgcgcTattgtgacgtca	0.4928	0.612779	5.20628	6.41257	strong	1	1.20629	0.11705
chrX	119871742	chrX:119871742:C:G	C	G	SNV	ZNF143	jaspar2022	MA0088.2	MA0088.2	gaggactgcgagagcCcgagcgcccgtctct	0.473584	0.450844	9.26558	8.82342	weak	1	-0.442163	-0.0226731
chr22	45998407	chr22:45998407:C:T	C	T	SNV	RELB	jaspar2022	MA1117.1	MA1117.1	ccgccttggaTgccatctgtc	0.478439	0.54333	4.41593	4.98223	weak	1	0.566297	0.0631496
chrX	41923740	chrX:41923740:G:C	G	C	SNV	NR2F2	jaspar2022	MA1111.1	MA1111.1	cactccaaccGgtcgggaggc	0.613742	0.506124	6.41364	5.31318	strong	1	-1.10046	-0.106187
chrX	131763828	chrX:131763828:G:A	G	A	SNV	SP1	jaspar2022	MA0079.5	MA0079.5	attgacatGgcttaggc	0.454071	0.416615	6.03825	5.54361	weak	1	-0.494637	-0.0373376
chr3	64341493	chr3:64341493:C:T	C	T	SNV	TBR1	jaspar2022	MA0802.1	MA0802.1	gaccacccaTagactgctg	0.554859	0.606227	6.28413	6.85055	weak	1	0.566421	0.0506069
chr2	41213821	chr2:41213821:T:G	T	G	SNV	NFIB	jaspar2022	MA1643.1	MA1643.1	gagtttaaatataagggattGgcattctgccaataaataag	0.803822	0.92134	13.4904	15.4088	strong	1	1.91843	0.114925
chr1	1306149	chr1:1306149:A:G	A	G	SNV	NR2F1	jaspar2022	MA1538.1	MA1538.1	ttcccagggcagtcActctacggcaccta	0.701972	0.621237	11.5	10.1958	strong	1	-1.3042	-0.0799419
chr16	87543949	chr16:87543949:C:T	C	T	SNV	CTCF	jaspar2022	MA1930.1	MA1930.1	gatctgaggcctcctgacggcctctggagccccCttctgccgcttcccacgtagggctgccgcgtgtg	0.822448	0.749105	13.5078	12.3726	strong	1	-1.13516	-0.0698308
chr7	66413607	chr7:66413607:G:A	G	A	SNV	CTCF	jaspar2022	MA0139.1	MA0139.1	ggcggggctgcgggggagGggggcctgggtcttccag	0.617953	0.578344	8.60203	8.06757	weak	1	-0.53446	-0.0388494
chr6	33082894	chr6:33082894:A:C	A	C	SNV	CTCF	jaspar2022	MA1930.1	MA1930.1	aggccattgggtatcaggccttaactccagcgcCccctggaggtcactgatgtggctccaggctgacc	0.630208	0.676757	10.5324	11.2528	strong	1	0.720464	0.0443203
chr10	133497518	chr10:133497518:G:C	G	C	SNV	CTCF	jaspar2022	MA1929.1	MA1929.1	ttttccttgacactaacgctactgctagaccacCgtctgcttggcaatgggcatcttcccagatgct	0.551775	0.619744	7.87351	8.74267	strong	1	0.869155	0.0638843
chr9	130893782	chr9:130893782:G:A	G	A	SNV	CTCF	jaspar2022	MA1930.1	MA1930.1	ggcgtctgtgggctctcttctgtccagtagaggGaagcaggcgcccagcggcaggaagaggaagtaga	0.644994	0.592529	10.7612	9.94919	strong	1	-0.812034	-0.0499533
chr16	11844045	chr16:11844045:C:G	C	G	SNV	NFIC	jaspar2022	MA1527.1	MA1527.1	tgagccagaaggaaggCtcactgtcggcacagt	0.620223	0.523461	10.7145	9.0611	strong	1	-1.65339	-0.0961059
chr1	1659220	chr1:1659220:A:G	A	G	SNV	SP1	jaspar2022	MA0079.5	MA0079.5	gactccggGggagcgac	0.712819	0.794639	9.45522	10.5357	strong	1	1.08049	0.0815611
chr3	118706049	chr3:118706049:A:C	A	C	SNV	CTCF	jaspar2022	MA1930.1	MA1930.1	cactgaaagtaatagatccctccaggctgccccCtaatggactatgacttctgtgaggaaaggggcat	0.576423	0.650803	9.6999	10.8511	strong	1	1.15123	0.0708194
chr1	165630909	chr1:165630909:G:A	G	A	SNV	BHLHE41	jaspar2022	MA0636.1	MA0636.1	gctacggtgActctgctgg	0.511195	0.570896	7.38233	8.24201	strong	1	0.85968	0.0596127
chr9	75083350	chr9:75083350:A:C	A	C	SNV	CTCF	jaspar2022	MA1930.1	MA1930.1	ccactgagtgccaaccactggggtgtgctcaggActgtcaaacagttcaacgtcaggtgacctgccgg	0.723843	0.686368	11.9816	11.4016	weak	1	-0.58002	-0.0356807
chr17	64919470	chr17:64919470:C:A	C	A	SNV	NR3C1	jaspar2022	MA0113.3	MA0113.3	cttgtttcttccgttaAcggagcgcggtcacgt	0.442973	0.471653	7.68634	8.17611	weak	1	0.489771	0.0284773
chr8	98368175	chr8:98368175:A:G	A	G	SNV	NR2F2	jaspar2022	MA1111.1	MA1111.1	aaaagaggtgAaaactacgtc	0.802391	0.648013	8.34269	6.76407	strong	1	-1.57861	-0.152327
chr2	128899623	chr2:128899623:C:T	C	T	SNV	NFIC	jaspar2022	MA1527.1	MA1527.1	tgggtctggcacagtgCccactgttctcaaagt	0.883534	0.767788	15.2138	13.236	strong	1	-1.97779	-0.114962
chr6	73548637	chr6:73548637:A:T	A	T	SNV	CTCF	jaspar2022	MA0139.1	MA0139.1	ttttgaagttacgcacccTactggtcacatgtgaggc	0.721789	0.826219	10.0032	11.4123	strong	1	1.40912	0.102428
chr12	29309518	chr12:29309518:G:C	G	C	SNV	CTCF	jaspar2022	MA1929.1	MA1929.1	catcaaggacttttctttagttaccacaagatgGgggtatttcctcctttttgcagtttataatctc	0.762494	0.706278	10.5681	9.84921	strong	1	-0.718856	-0.052837
chr4	148239705	chr4:148239705:C:G	C	G	SNV	NFIC	jaspar2022	MA1527.1	MA1527.1	agaagcggtatgaggtCcacagtttatgaaaac	0.515244	0.398459	8.92068	6.92514	strong	1	-1.99554	-0.115994
chrX	135052279	chrX:135052279:A:G	A	G	SNV	NR2F2	jaspar2022	MA1111.1	MA1111.1	acttgtggtcActagtgcgct	0.769978	0.6156	8.01124	6.43263	strong	1	-1.57861	-0.152327
chr12	112963786	chr12:112963786:G:A	G	A	SNV	CTCF	jaspar2022	MA1930.1	MA1930.1	gctgagcacccagctttgctgagcctcttctctGccctctgctgctgtccttgttccacttctcctcc	0.79587	0.768268	13.0964	12.6692	weak	1	-0.427214	-0.0262806
chr9	63817332	chr9:63817332:T:C	T	C	SNV	NR2F1	jaspar2022	MA0017.2	MA0017.2	aggcggaggagtTgagccacagaaa	0.697816	0.577643	8.46332	7.03527	strong	1	-1.42806	-0.118469
chrX	47650835	chrX:47650835:A:G	A	G	SNV	MAZ	jaspar2022	MA1522.1	MA1522.1	agcaactgaaGaggctcgggg	0.57974	0.696647	7.79406	9.34897	strong	1	1.55491	0.116179
chr14	88224905	chr14:88224905:C:T	C	T	SNV	NFIC	jaspar2022	MA1527.1	MA1527.1	tgtgagccaccatgccTggcagaaagccaactt	0.879932	0.996717	15.1522	17.1478	strong	1	1.99554	0.115994
chr12	53054536	chr12:53054536:C:T	C	T	SNV	CTCF	jaspar2022	MA0139.1	MA0139.1	caccagcggaggcgaggcCgccagggggcgggaccag	0.916548	0.777943	12.6311	10.7609	strong	1	-1.87027	-0.135949
chr13	97433070	chr13:97433070:A:G	A	G	SNV	SOX8	jaspar2022	MA0868.2	MA0868.2	tgcgcgaagAgccccgcct	0.496319	0.440116	4.55795	4.05963	weak	1	-0.49832	-0.0552231
chr1	203031686	chr1:203031686:C:G	C	G	SNV	CTCF	jaspar2022	MA0139.1	MA0139.1	tttttaccaccagaggacGctgtttaatatttgtccc	0.869283	0.901677	11.9934	12.4305	weak	1	0.437104	0.0317727
chr7	2707008	chr7:2707008:G:C	G	C	SNV	OLIG2	jaspar2022	MA0678.1	MA0678.1	ctgtggtggCtcatgcctg	0.498359	0.626191	5.73607	7.18893	strong	1	1.45286	0.127027
chr19	17794810	chr19:17794810:A:G	A	G	SNV	NFIC	jaspar2022	MA1527.1	MA1527.1	gaccgggctctgtgccAggaacccgcaaggcgc	0.858571	0.741786	14.7872	12.7917	strong	1	-1.99554	-0.115994
chr9	40992221	chr9:40992221:A:G	A	G	SNV	REST	jaspar2022	MA0138.2	MA0138.2	ttcggccctctgcagccgccAtagctccccagcagaaaccc	0.602737	0.54744	12.4407	11.3391	strong	1	-1.10157	-0.0541194
chrX	135052279	chrX:135052279:A:G	A	G	SNV	CTCF	jaspar2022	MA1930.1	MA1930.1	ttgcgcgagctccgcccacaaagacttgtggtcGctagtgcgctggtgcgtcacagggcgcggaaggg	0.561486	0.622489	9.46872	10.4129	strong	1	0.944183	0.0580827
chr11	62123899	chr11:62123899:T:C	T	C	SNV	EGR1	jaspar2022	MA0162.4	MA0162.4	gattgctagtggaCatggccaatagga	0.53745	0.581951	5.65762	6.10057	weak	1	0.442955	0.0431655
chr12	124914604	chr12:124914604:G:A	G	A	SNV	CREB1	jaspar2022	MA0018.4	MA0018.4	gacgatcacagcAatccacaaacaa	0.587745	0.740383	6.16088	7.69552	strong	1	1.53464	0.148911
chr6	141907831	chr6:141907831:G:C	G	C	SNV	NFIC	jaspar2022	MA1527.1	MA1527.1	aaagtcttggctgattGccaacctattttttat	0.997358	0.880573	17.1587	15.1632	strong	1	-1.99554	-0.115994
chr16	3992448	chr16:3992448:C:T	C	T	SNV	NEUROD1	jaspar2022	MA1109.1	MA1109.1	caccccgacctcTgctgcggggcgc	0.645146	0.758209	7.19237	8.42733	strong	1	1.23497	0.111576
chr2	231514523	chr2:231514523:G:T	G	T	SNV	SP1	jaspar2022	MA0079.5	MA0079.5	gtggagggGgggccgca	0.820256	0.730782	10.874	9.69244	strong	1	-1.18157	-0.089191
chr19	51334078	chr19:51334078:A:G	A	G	SNV	NR2F1	jaspar2022	MA0017.2	MA0017.2	aggtaggagggcAggatggatgacc	0.752506	0.592023	9.11322	7.20614	strong	1	-1.90708	-0.158208
chr4	8547243	chr4:8547243:G:A	G	A	SNV	CTCF	jaspar2022	MA0139.1	MA0139.1	gtaaaatgggtgaatggcGccctctttggccattttg	0.784528	0.726481	10.8497	10.0665	strong	1	-0.783266	-0.056935
chr5	80013845	chr5:80013845:T:A	T	A	SNV	NFIC	jaspar2022	MA0161.2	MA0161.2	gcatagggccAaaaacgtagt	0.61791	0.758808	6.09143	7.43861	strong	1	1.34717	0.138246
chr9	134165034	chr9:134165034:T:G	T	G	SNV	MEIS2	jaspar2022	MA0774.1	MA0774.1	gaccctgTggtgcgc	0.63163	0.483242	6.46814	4.97618	strong	1	-1.49196	-0.146675
chr5	154197539	chr5:154197539:A:G	A	G	SNV	CTCF	jaspar2022	MA1930.1	MA1930.1	ctttgaatggttcctgtttgctgccctctgctgGgtgtagataggagagaaaagaaaaaagcaggcct	0.6699	0.71667	11.1467	11.8706	strong	1	0.723884	0.0445307
chr7	151276155	chr7:151276155:T:G	T	G	SNV	MAZ	jaspar2022	MA1522.1	MA1522.1	gggggggaggGgccctgcaag	0.86898	0.999741	11.6411	13.3803	strong	1	1.73918	0.129948
chr17	8994382	chr17:8994382:C:A	C	A	SNV	CTCF	jaspar2022	MA1929.1	MA1929.1	taccattgaaaaaagagtttgctactcacagttCcggagtggaagggacatgccatgccacacaggg	0.582172	0.544263	8.26222	7.77745	weak	1	-0.484761	-0.0356307
chr9	26145362	chr9:26145362:A:G	A	G	SNV	NFIC	jaspar2022	MA1527.1	MA1527.1	gatttattagtagctgGacacatgccaagacat	0.76496	0.880706	13.1877	15.1655	strong	1	1.97779	0.114962
chr3	4339751	chr3:4339751:T:G	T	G	SNV	NFIC	jaspar2022	MA0161.2	MA0161.2	cccacattttGgcacccatcc	0.703329	0.869401	6.90815	8.49603	strong	1	1.58788	0.162947
chr13	111291585	chr13:111291585:G:A	G	A	SNV	NFIC	jaspar2022	MA1527.1	MA1527.1	tcaggtttatggtcttGgcaaagagccagctga	0.973264	0.857518	16.747	14.7692	strong	1	-1.97779	-0.114962
chr11	57667783	chr11:57667783:T:G	T	G	SNV	REST	jaspar2022	MA0138.2	MA0138.2	cgtcttctcgcgtgcgtacgGcgttgtgttgctgcagccaa	0.548514	0.596408	11.3605	12.3146	strong	1	0.95409	0.0468736
chrX	39687503	chrX:39687503:T:C	T	C	SNV	SP1	jaspar2022	MA0079.5	MA0079.5	ctcaggctCgctctctc	0.503351	0.538893	6.68904	7.15839	weak	1	0.469351	0.0354289
chr12	120370003	chr12:120370003:G:A	G	A	SNV	NR2F1	jaspar2022	MA1538.1	MA1538.1	gttctcagtttgccAccacccccacctcc	0.479689	0.538783	7.90917	8.8638	strong	1	0.954627	0.0585145
chr9	63817564	chr9:63817564:T:G	T	G	SNV	NFIC	jaspar2022	MA1527.1	MA1527.1	tcaggaatgctttcttGtcattgttgacagccc	0.558884	0.624172	9.66638	10.782	strong	1	1.11558	0.0648449
chr12	107874912	chr12:107874912:T:C	T	C	SNV	NFIC	jaspar2022	MA1527.1	MA1527.1	ccacccagtccagtccTggcttggtgccagggg	0.973489	0.858346	16.7509	14.7834	strong	1	-1.96749	-0.114363
chr14	54699397	chr14:54699397:A:G	A	G	SNV	MEF2A	jaspar2022	MA0052.4	MA0052.4	gacttgctgaggtcAtctgtgccctcctg	0.500133	0.433923	5.39457	4.72067	weak	1	-0.673905	-0.0642896
chrX	101098121	chrX:101098121:T:C	T	C	SNV	NR2F1	jaspar2022	MA1538.1	MA1538.1	ttcagctgagtgcgCtgctccgcccagcc	0.540298	0.585179	8.88827	9.61328	strong	1	0.72501	0.04444
chrX	135052279	chrX:135052279:A:G	A	G	SNV	PKNOX1	jaspar2022	MA0782.2	MA0782.2	aaagacttgtggtcActagtgcgctggtg	0.700405	0.572309	7.66466	6.31993	strong	1	-1.34472	-0.124399
chr9	131622206	chr9:131622206:C:T	C	T	SNV	NR2F1	jaspar2022	MA1538.1	MA1538.1	tccagaccggcagaTgcgcaacaccaatg	0.455293	0.483792	7.51509	7.97545	weak	1	0.460364	0.0282183
chr3	49007334	chr3:49007334:C:T	C	T	SNV	SP1	jaspar2022	MA0079.5	MA0079.5	gctgagggCgctgttga	0.747331	0.684579	9.91098	9.08229	strong	1	-0.828693	-0.0625538
chr2	90392334	chr2:90392334:T:C	T	C	SNV	MEIS2	jaspar2022	MA0774.1	MA0774.1	tcatcatTgaatgga	0.623119	0.46874	6.38256	4.83036	strong	1	-1.5522	-0.152597
chr4	28536260	chr4:28536260:T:C	T	C	SNV	NFIC	jaspar2022	MA1527.1	MA1527.1	tattattttcagattcTgtctgattcaaagatc	0.510119	0.435999	8.83311	7.5666	strong	1	-1.26651	-0.0736174
chr19	36973405	chr19:36973405:G:A	G	A	SNV	ZNF24	jaspar2022	MA1124.1	MA1124.1	gcttcaccgctaAgggaggtcaggg	0.425293	0.454989	6.86712	7.32255	weak	1	0.455432	0.0290433
chr3	184456145	chr3:184456145:T:G	T	G	SNV	NFIC	jaspar2022	MA0161.2	MA0161.2	ctggtgactgGgtttcagtca	0.461657	0.608479	4.59743	6.00125	strong	1	1.40382	0.144059
chr16	86187610	chr16:86187610:A:G	A	G	SNV	NR2F1	jaspar2022	MA0017.2	MA0017.2	cggcctctgcatAcatccaagggat	0.477636	0.441922	5.84684	5.42244	weak	1	-0.4244	-0.0352075
chr9	40992220	chr9:40992220:C:T	C	T	SNV	ZNF143	jaspar2022	MA0088.2	MA0088.2	gccctctgcagccgcCatagctccccagcag	0.513867	0.487277	10.0489	9.53184	weak	1	-0.517034	-0.0265124
chr18	12271829	chr18:12271829:G:C	G	C	SNV	CTCF	jaspar2022	MA1930.1	MA1930.1	gaccagaacgctggagcaggaagccgccagcagGtgtctcgctccccggtcccagcgccctcaggaag	0.778005	0.746809	12.8199	12.3371	weak	1	-0.482827	-0.0297018
chr8	20436846	chr8:20436846:T:G	T	G	SNV	CTCF	jaspar2022	MA1929.1	MA1929.1	tggctcagcagagcgtgtgagatgtgatcacaaGcttgaaataacacagacagtctctgctctctgc	0.457978	0.513842	6.67409	7.38845	strong	1	0.714363	0.0525068
chr19	53537607	chr19:53537607:G:C	G	C	SNV	MAZ	jaspar2022	MA1522.1	MA1522.1	gcctgggaccCtcccggacta	0.723261	0.853027	9.70295	11.4289	strong	1	1.72595	0.128959
chr3	53863902	chr3:53863902:A:C	A	C	SNV	NFIC	jaspar2022	MA1527.1	MA1527.1	gatcttggctcactgcCacctctgcctcctgag	0.864228	0.97981	14.8839	16.8589	strong	1	1.97499	0.114799
chr21	39385961	chr21:39385961:G:A	G	A	SNV	FOXK2	jaspar2022	MA1103.2	MA1103.2	cgagctgcacAcactgcgcag	0.553105	0.714784	5.03894	6.45104	strong	1	1.4121	0.157916
chr11	63430685	chr11:63430685:A:G	A	G	SNV	NR2F1	jaspar2022	MA1538.1	MA1538.1	agccaagggaagccGtgacagacagcacc	0.554736	0.616137	9.1215	10.1134	strong	1	0.991878	0.0607979
chr20	16574975	chr20:16574975:G:C	G	C	SNV	NFIC	jaspar2022	MA0161.2	MA0161.2	ttgagaagccGccagggagcc	0.745386	0.600525	7.31028	5.92521	strong	1	-1.38506	-0.142135
chr16	31033576	chr16:31033576:G:A	G	A	SNV	SRF	jaspar2022	MA0083.3	MA0083.3	gaggctgcgggagctAgagcggggaagaaaa	0.478452	0.513318	9.25697	9.91741	weak	1	0.66044	0.0345126
chr7	128461555	chr7:128461555:G:A	G	A	SNV	CTCF	jaspar2022	MA0139.1	MA0139.1	tgtggcctgaactctagtGccacctagtggaccctaa	0.959335	0.901288	13.2085	12.4252	strong	1	-0.783266	-0.056935
chr8	119076828	chr8:119076828:C:T	C	T	SNV	NFIC	jaspar2022	MA1527.1	MA1527.1	atactgggtgaccaaaTgacaggacaaccaaaa	0.70069	0.734167	12.0895	12.6615	weak	1	0.572036	0.0332504
chr2	61764342	chr2:61764342:G:C	G	C	SNV	SP4	jaspar2022	MA0685.2	MA0685.2	cgatgggcGggacgggg	0.850513	0.814595	11.105	10.6367	weak	1	-0.468235	-0.0358699
chr7	36484046	chr7:36484046:C:A	C	A	SNV	SP1	jaspar2022	MA0079.5	MA0079.5	cactagccCttttgttt	0.608671	0.492572	8.07986	6.54668	strong	1	-1.53318	-0.115732
chr16	12893554	chr16:12893554:G:C	G	C	SNV	NFIC	jaspar2022	MA0161.2	MA0161.2	ggcacaaagcCaacatctaat	0.595245	0.760593	5.87472	7.45567	strong	1	1.58095	0.162237
chr9	63817564	chr9:63817564:T:G	T	G	SNV	CLOCK	jaspar2022	MA0819.2	MA0819.2	tgctttcttGtcattgttg	0.414348	0.51672	4.07259	5.06428	strong	1	0.991695	0.101755
chr4	138919306	chr4:138919306:C:T	C	T	SNV	CTCF	jaspar2022	MA0139.1	MA0139.1	caggtgtgacacgagtgcCctctgccgtccagaatgg	0.821789	0.69185	11.3525	9.59916	strong	1	-1.75334	-0.127449
chr1	5231723	chr1:5231723:A:G	A	G	SNV	BHLHE41	jaspar2022	MA0636.1	MA0636.1	gctggtcttGgaaatcttc	0.338786	0.434721	4.89966	6.28111	strong	1	1.38145	0.0957938
chr4	1051037	chr4:1051037:C:G	C	G	SNV	MAZ	jaspar2022	MA1522.1	MA1522.1	ctagcgccctCcagtgttgcc	0.833655	0.689116	11.1712	9.24881	strong	1	-1.92243	-0.14364
chr4	119862029	chr4:119862029:G:A	G	A	SNV	SOX8	jaspar2022	MA0868.2	MA0868.2	ctggaaaaaAtccagatta	0.677329	0.786534	6.16285	7.1311	strong	1	0.968247	0.1073
chr2	231017403	chr2:231017403:G:A	G	A	SNV	NFIC	jaspar2022	MA1527.1	MA1527.1	gactttgtctacatccAgagagagtgcccacaa	0.53602	0.629151	9.27569	10.867	strong	1	1.59135	0.0924997
chr6	66631146	chr6:66631146:C:T	C	T	SNV	NR2F1	jaspar2022	MA1537.1	MA1537.1	gacgggcttaaaaaTggcacaccaggaga	0.455595	0.525963	8.5007	9.80458	strong	1	1.30388	0.0701458
chr1	16644816	chr1:16644816:G:A	G	A	SNV	CTCF	jaspar2022	MA1929.1	MA1929.1	tccgctaggggaccccctccgtggcttcccaccAggttgttccaggcctcagcttcgccgaaaggcc	0.573198	0.614339	8.14746	8.67355	weak	1	0.526087	0.0386682
chr2	197453301	chr2:197453301:A:C	A	C	SNV	NR2F1	jaspar2022	MA0017.2	MA0017.2	cgagcgcacgggCaaagcgattggt	0.600799	0.696848	7.31044	8.45182	strong	1	1.14138	0.0946868
chrX	151397088	chrX:151397088:G:T	G	T	SNV	RELB	jaspar2022	MA1117.1	MA1117.1	cccccgcgccGgcaacagccc	0.591986	0.446371	5.40685	4.13607	strong	1	-1.27077	-0.141708
chr1	3170620	chr1:3170620:C:T	C	T	SNV	SOX8	jaspar2022	MA0868.2	MA0868.2	ccgcagctcTccaccccca	0.397161	0.448217	3.67877	4.13146	weak	1	0.452684	0.0501657
chr17	38456632	chr17:38456632:T:G	T	G	SNV	CTCF	jaspar2022	MA0139.1	MA0139.1	ttaagagtcctctaggggGcctcttggcttttcaaag	0.793635	0.862636	10.9726	11.9037	strong	1	0.931078	0.0676793
chr22	31879956	chr22:31879956:C:T	C	T	SNV	TBR1	jaspar2022	MA0802.1	MA0802.1	accaacagaTggtatttag	0.504996	0.642439	5.7343	7.24985	strong	1	1.51555	0.135407
chr10	35917002	chr10:35917002:T:G	T	G	SNV	CTCF	jaspar2022	MA1929.1	MA1929.1	gcattggctagatgaagggaggctccctccagtGgtacttgtttatgctgagattgaagatcattga	0.625079	0.679727	8.81089	9.50969	weak	1	0.698799	0.0513628
chr11	109038644	chr11:109038644:C:G	C	G	SNV	TBR1	jaspar2022	MA0802.1	MA0802.1	acgtgtctgGtgtgatgct	0.682104	0.845982	7.68722	9.49425	strong	1	1.80703	0.161449
chr9	127971427	chr9:127971427:C:T	C	T	SNV	SP1	jaspar2022	MA0079.5	MA0079.5	cattgatgCccccagct	0.644549	0.587569	8.55366	7.8012	strong	1	-0.752467	-0.0568
chrX	103686819	chrX:103686819:A:G	A	G	SNV	ATF7	jaspar2022	MA0834.1	MA0834.1	gttccataatcaaGtgattggacaacc	0.592137	0.711877	9.62879	11.5645	strong	1	1.93567	0.119323
chr18	12540055	chr18:12540055:A:C	A	C	SNV	CTCF	jaspar2022	MA1930.1	MA1930.1	agagtggtcagtaggtggcaccagagcagagagCtcaatgaagattggagtgagccatgcacagacct	0.509022	0.536386	8.6567	9.08023	weak	1	0.423538	0.0260545
chr1	227447897	chr1:227447897:G:A	G	A	SNV	CTCF	jaspar2022	MA1929.1	MA1929.1	tggacggctggttttcctgctctgccacctcccGggggatgtgagacctgcaggccttctcccgggt	0.908881	0.797986	12.44	11.0219	strong	1	-1.41807	-0.10423
chr17	81356193	chr17:81356193:C:T	C	T	SNV	NR2F1	jaspar2022	MA0017.2	MA0017.2	tggtggtgcatgCctgtaatcctag	0.609758	0.573879	7.41689	6.99054	weak	1	-0.426353	-0.0353695
chr22	24837695	chr22:24837695:T:C	T	C	SNV	CTCF	jaspar2022	MA1929.1	MA1929.1	ggtaacgggcgtcttcccagatgctggcatcacCgctagaccaaggagccctctggtggccctgtcc	0.625713	0.668933	8.81899	9.37166	weak	1	0.552667	0.0406219
chr3	197627986	chr3:197627986:C:A	C	A	SNV	CREB1	jaspar2022	MA0018.4	MA0018.4	gggtctaaggggAggggacgccgcg	0.542853	0.588876	5.70952	6.17225	weak	1	0.462728	0.0449
chrX	131752600	chrX:131752600:G:T	G	T	SNV	SP1	jaspar2022	MA0079.5	MA0079.5	aaaagggcGccaagata	0.679972	0.532409	9.02146	7.07277	strong	1	-1.94869	-0.147097
chr20	38790643	chr20:38790643:T:C	T	C	SNV	CTCF	jaspar2022	MA1929.1	MA1929.1	tcccgaactttgagagagacctgatactgccacCtggtggccaatagaaactatgcaagacccgctg	0.798586	0.913492	11.0296	12.4989	strong	1	1.46935	0.108
chr6	166782700	chr6:166782700:G:A	G	A	SNV	NEUROD1	jaspar2022	MA1109.1	MA1109.1	ctgggagggagcAgatggccaggag	0.819406	0.983673	9.09578	10.89	strong	1	1.79426	0.162107
chr22	11066933	chr22:11066933:A:G	A	G	SNV	NR2F1	jaspar2022	MA1538.1	MA1538.1	cgtgcactgccagcGgcgggtggtggggg	0.458777	0.545167	7.57136	8.96692	strong	1	1.39556	0.085542
chr14	77217780	chr14:77217780:C:G	C	G	SNV	TCF12	jaspar2022	MA1648.1	MA1648.1	ctgggcaggtGctggtctccc	0.829751	0.999545	7.13451	8.55695	strong	1	1.42244	0.166158
chr1	39609695	chr1:39609695:A:G	A	G	SNV	CTCF	jaspar2022	MA1930.1	MA1930.1	gtgaggtggggagccgatggtgagcctggagccGctgggagggcgccggcctttgcactggttgggag	0.62337	0.661536	10.4265	11.0173	weak	1	0.59072	0.0363389
chrX	131741908	chrX:131741908:C:A	C	A	SNV	MEF2A	jaspar2022	MA0052.4	MA0052.4	cttcaggtatgggaAgaagcactgttcca	0.49209	0.564206	5.31271	6.04672	strong	1	0.734013	0.0700239
chr3	49615164	chr3:49615164:C:G	C	G	SNV	ZNF24	jaspar2022	MA1124.1	MA1124.1	caaacaggctggGctggaacaaatt	0.515697	0.555979	8.2536	8.8714	weak	1	0.617799	0.0393976
chr3	75785697	chr3:75785697:G:C	G	C	SNV	CTCF	jaspar2022	MA0139.1	MA0139.1	tgaggctctgcggtccccCgttaggaacccaagccgg	0.601904	0.678252	8.38548	9.41569	strong	1	1.0302	0.0748847
chr11	104662108	chr11:104662108:G:A	G	A	SNV	RELB	jaspar2022	MA1117.1	MA1117.1	tgcttctgaaGgagcctgcca	0.564846	0.451315	5.17	4.17922	strong	1	-0.990775	-0.110484
chr5	10134053	chr5:10134053:C:T	C	T	SNV	CTCF	jaspar2022	MA1930.1	MA1930.1	atctgggccattctaatagctatgtagtgacatCtcatggtcatttggttttaacacttttttgttag	0.740148	0.625196	12.234	10.4548	strong	1	-1.77917	-0.109448
chr11	126890823	chr11:126890823:A:G	A	G	SNV	ZNF24	jaspar2022	MA1124.1	MA1124.1	cagcatcctcccAaccactgtcctc	0.503748	0.44346	8.07036	7.14574	strong	1	-0.924618	-0.0589637
chr7	66413607	chr7:66413607:G:A	G	A	SNV	OLIG2	jaspar2022	MA0678.1	MA0678.1	gcgggggagAggggcctgg	0.384874	0.489984	4.44626	5.64088	strong	1	1.19462	0.104448
chr9	40992221	chr9:40992221:A:G	A	G	SNV	SOX8	jaspar2022	MA0868.2	MA0868.2	gcagccgccAtagctcccc	0.582386	0.464537	5.32105	4.27615	strong	1	-1.0449	-0.115794
chr19	2962311	chr19:2962311:A:G	A	G	SNV	CTCF	jaspar2022	MA0139.1	MA0139.1	gcccctccctgccttgagGgtctcaatgggatgaacc	0.584088	0.662993	8.14507	9.20978	strong	1	1.06471	0.0773926
chr3	116517497	chr3:116517497:C:A	C	A	SNV	CTCF	jaspar2022	MA1929.1	MA1929.1	aatgtaagagcaatactgtattctgaaagactgCcaccttgaggtcacttattgttaaacagaaaga	0.826978	0.77357	11.3926	10.7097	weak	1	-0.682949	-0.0501978
chr17	5132669	chr17:5132669:C:G	C	G	SNV	CTCF	jaspar2022	MA0139.1	MA0139.1	gcgcgcttgtgtcaggacGccacctagaggctgggac	0.836707	0.900159	11.5538	12.41	strong	1	0.856183	0.0622352
chr3	98657592	chr3:98657592:A:G	A	G	SNV	CTCF	jaspar2022	MA1930.1	MA1930.1	tggggccgacgcctgggtggctgccgccgccgcAcctgctgcgagatagtgatcttcgtcgcggaagg	0.76695	0.717033	12.6488	11.8762	strong	1	-0.772596	-0.0475273
chr9	125241700	chr9:125241700:G:A	G	A	SNV	PKNOX1	jaspar2022	MA0782.2	MA0782.2	gggggtcggagtagGtccagcaggagtga	0.592839	0.532561	6.53545	5.90266	weak	1	-0.632791	-0.058539
chr15	60299878	chr15:60299878:C:T	C	T	SNV	CTCF	jaspar2022	MA1929.1	MA1929.1	tggcaccttgccatcccctcctcctctgggcgaCgcctgcctgtaggaacaggaaaagcatctgatg	0.74255	0.656054	10.313	9.20698	strong	1	-1.10605	-0.0812966
chr19	51986911	chr19:51986911:G:C	G	C	SNV	BHLHE41	jaspar2022	MA0636.1	MA0636.1	caaggacaaGcgcatttac	0.594169	0.45662	8.57715	6.59645	strong	1	-1.9807	-0.137348
chr1	245990639	chr1:245990639:T:C	T	C	SNV	CTCF	jaspar2022	MA0139.1	MA0139.1	cattgacaggaatcatctCggtctgaaggaagggatc	0.605201	0.646869	8.42997	8.99221	weak	1	0.562242	0.0408689
chrX	131747410	chrX:131747410:A:G	A	G	SNV	CTCF	jaspar2022	MA0139.1	MA0139.1	tatagacaaatcacaaccAaacgtggatgccttctat	0.663714	0.605006	9.21951	8.42733	strong	1	-0.792178	-0.0575828
chr3	197458507	chr3:197458507:C:T	C	T	SNV	CTCF	jaspar2022	MA1930.1	MA1930.1	actctctgccgggtgactgcgccagcgcccagaCcacctgctggagaaagaaagcatggcacgttgaa	0.623623	0.589942	10.4304	9.90914	weak	1	-0.5213	-0.0320685
chr6	166782700	chr6:166782700:G:A	G	A	SNV	MAZ	jaspar2022	MA1522.1	MA1522.1	gggagggagcGgatggccagg	0.863492	0.73229	11.5681	9.82305	strong	1	-1.74503	-0.130385
chrX	119791742	chrX:119791742:C:T	C	T	SNV	NEUROD1	jaspar2022	MA1109.1	MA1109.1	gcggtgcgctccTgtggcgccgtgg	0.562481	0.660327	6.28943	7.35819	strong	1	1.06876	0.09656
chr2	130288531	chr2:130288531:C:G	C	G	SNV	CTCF	jaspar2022	MA1930.1	MA1930.1	agctcccgggaaagtacttaaaaaggccactagGaagcgcgcgatgaacggcgcaaacacctacggga	0.671679	0.702874	11.1742	11.6571	weak	1	0.482827	0.0297018
chr20	57381966	chr20:57381966:G:A	G	A	SNV	SP1	jaspar2022	MA0079.5	MA0079.5	cagatggcGcgaatggc	0.639195	0.491632	8.48296	6.53427	strong	1	-1.94869	-0.147097
chr1	58700166	chr1:58700166:T:G	T	G	SNV	REST	jaspar2022	MA0138.2	MA0138.2	gcgtcgtccggcccctcccgGgccgggaggcggggtttcca	0.503159	0.570338	10.457	11.7953	strong	1	1.33826	0.0657478
chr21	39385961	chr21:39385961:G:A	G	A	SNV	NR3C1	jaspar2022	MA0113.3	MA0113.3	tccctgcgagctgcacAcactgcgcaggcgccc	0.690714	0.785058	11.917	13.5281	strong	1	1.61111	0.0936765
chr2	231017578	chr2:231017578:A:G	A	G	SNV	ZNF24	jaspar2022	MA1124.1	MA1124.1	cacctgtgagtcAgatttggattag	0.548113	0.451405	8.75077	7.2676	strong	1	-1.48316	-0.0945827
chrX	41923740	chrX:41923740:G:C	G	C	SNV	SP1	jaspar2022	MA0079.5	MA0079.5	ctccaaccCgtcgggag	0.662154	0.767974	8.78615	10.1836	strong	1	1.39744	0.105485
chr8	21325332	chr8:21325332:A:G	A	G	SNV	NFIC	jaspar2022	MA0161.2	MA0161.2	agacaacttgGcacactgcca	0.843586	0.999707	8.2492	9.74193	strong	1	1.49273	0.153183
chr4	78939358	chr4:78939358:C:T	C	T	SNV	MEF2A	jaspar2022	MA0052.4	MA0052.4	ccgcgctgccgctgTtgcccagggcccgg	0.335546	0.472493	3.71937	5.11325	strong	1	1.39388	0.132975
chr3	10473569	chr3:10473569:G:T	G	T	SNV	NFIC	jaspar2022	MA0161.2	MA0161.2	gaggcaagttGgcagtgagcc	0.86968	0.703608	8.4987	6.91082	strong	1	-1.58788	-0.162947
chr5	154197539	chr5:154197539:A:G	A	G	SNV	CTCF	jaspar2022	MA0139.1	MA0139.1	gtttgctgccctctgctgGgtgtagataggagagaaa	0.855505	0.93441	11.8075	12.8722	strong	1	1.06471	0.0773926
chr19	39199303	chr19:39199303:G:A	G	A	SNV	SP1	jaspar2022	MA0079.5	MA0079.5	ccgtgatcGcgcagggc	0.58286	0.458522	7.73901	6.09703	strong	1	-1.64199	-0.123945
chr12	108562657	chr12:108562657:C:T	C	T	SNV	ATF7	jaspar2022	MA0834.1	MA0834.1	cgtctgaggcgggCggcatcggctctg	0.595128	0.551059	9.67714	8.96474	strong	1	-0.712394	-0.043915
chrX	119853214	chrX:119853214:T:C	T	C	SNV	MEF2A	jaspar2022	MA0052.4	MA0052.4	cgcgtcattagcaaTtccgccatcttgaa	0.544636	0.499402	5.84754	5.38713	weak	1	-0.460411	-0.0439226
chr11	2700338	chr11:2700338:T:C	T	C	SNV	NR2F2	jaspar2022	MA1111.1	MA1111.1	cggggtgagcTggagacacgg	0.748965	0.604473	7.79638	6.31885	strong	1	-1.47752	-0.142572
chr18	42052327	chr18:42052327:G:A	G	A	SNV	CTCF	jaspar2022	MA0139.1	MA0139.1	gttaacagttttccactaGagggtgctccagatttgc	0.905098	0.765635	12.4766	10.5948	strong	1	-1.88185	-0.13679
chr10	17206525	chr10:17206525:T:A	T	A	SNV	MEF2A	jaspar2022	MA0052.4	MA0052.4	ctatgaactatcacTtggcatgattcaga	0.594617	0.537927	6.35625	5.77925	weak	1	-0.577	-0.055045
chr2	85676347	chr2:85676347:C:G	C	G	SNV	NFIB	jaspar2022	MA1643.1	MA1643.1	gcaatgtgccaggcactaatCtaggcactggagatacagca	0.664491	0.549459	11.2158	9.33799	strong	1	-1.87785	-0.112494
chr2	63841654	chr2:63841654:G:T	G	T	SNV	CTCF	jaspar2022	MA1930.1	MA1930.1	atggctggtgaaaatggttgcactgcccccgctTgccggcctcgcccgcctccccgacccctgcttgg	0.649181	0.685243	10.826	11.3842	weak	1	0.558151	0.0343354
chr17	40987206	chr17:40987206:C:T	C	T	SNV	NFIC	jaspar2022	MA0161.2	MA0161.2	agaaatttggCtcagggccag	0.760764	0.621744	7.45731	6.12809	strong	1	-1.32922	-0.136404
chr12	113757309	chr12:113757309:C:T	C	T	SNV	MEF2A	jaspar2022	MA0052.4	MA0052.4	ctccaggcctccacTtgctgggcggcatc	0.384037	0.480141	4.21292	5.19109	strong	1	0.978168	0.0933159
chr16	74616968	chr16:74616968:T:C	T	C	SNV	NFIC	jaspar2022	MA0161.2	MA0161.2	acttcctttaTggcaatttgc	0.723898	0.603188	7.10482	5.95067	strong	1	-1.15415	-0.118438
chr5	180116811	chr5:180116811:A:C	A	C	SNV	NFIC	jaspar2022	MA0161.2	MA0161.2	tgccctgcgaAcaccacacac	0.704095	0.561262	6.91548	5.5498	strong	1	-1.36568	-0.140146
chr1	7667794	chr1:7667794:T:C	T	C	SNV	ZNF143	jaspar2022	MA0088.2	MA0088.2	ggccagccttgctttCccagaagccctcaat	0.613635	0.708951	11.9889	13.8423	strong	1	1.8534	0.095038
chr10	124206780	chr10:124206780:G:A	G	A	SNV	EGR1	jaspar2022	MA0162.4	MA0162.4	gctgagctaacgcGtgggcttgaggcc	0.855224	0.688802	8.8207	7.16416	strong	1	-1.65655	-0.161429
chr17	15699586	chr17:15699586:T:G	T	G	SNV	CTCF	jaspar2022	MA1929.1	MA1929.1	tactctcgcgagacggacggagctcttcgatcgGccgattctcccagccgcaccacgggtgctccca	0.557618	0.605177	7.94824	8.55639	weak	1	0.608156	0.0447004
chr22	46762547	chr22:46762547:T:C	T	C	SNV	SP4	jaspar2022	MA0685.2	MA0685.2	gcgcggcgCcgcccttt	0.817807	0.928892	10.6786	12.1267	strong	1	1.44813	0.110936
chr12	23663204	chr12:23663204:T:C	T	C	SNV	NFIC	jaspar2022	MA1527.1	MA1527.1	tagttctagagtttggCgtgatgccagtttcaa	0.900093	0.996854	15.4967	17.1501	strong	1	1.65339	0.0961059
chr1	20480580	chr1:20480580:G:T	G	T	SNV	CTCF	jaspar2022	MA1929.1	MA1929.1	aacccttacacaatgactatcagagccgacaggGcctcaaaccaacaaaccaacaaaggacctttaa	0.610722	0.541492	8.6273	7.74203	strong	1	-0.885269	-0.0650686
chr2	196850089	chr2:196850089:G:T	G	T	SNV	CTCF	jaspar2022	MA1930.1	MA1930.1	tatttcctcatctttttcctgctgagccacaggGtggcagtggttgtagtgttcctgcacccaaggct	0.650798	0.619805	10.851	10.3714	weak	1	-0.47969	-0.0295087
chr12	113102017	chr12:113102017:A:G	A	G	SNV	SP1	jaspar2022	MA0079.5	MA0079.5	gctgagggGacacagct	0.596717	0.664987	7.92201	8.82356	strong	1	0.901556	0.0680539
chr17	64919496	chr17:64919496:A:T	A	T	SNV	SOX8	jaspar2022	MA0868.2	MA0868.2	gagctgagcAgcctacgag	0.460132	0.412704	4.2371	3.81659	weak	1	-0.420508	-0.0466
chr19	40570843	chr19:40570843:C:G	C	G	SNV	CTCF	jaspar2022	MA1930.1	MA1930.1	gtgtggctcaacttcaggccctccagcaggtggCggtagtaggtggggccagagctggggggtggtgg	0.82983	0.797916	13.622	13.1281	weak	1	-0.493939	-0.0303853
chr7	351877	chr7:351877:C:T	C	T	SNV	CTCF	jaspar2022	MA1929.1	MA1929.1	cagccttcagaagcacgtgaaagcaatgcccccTgctgctcacacccattacgggctccctcttcct	0.668815	0.714344	9.37016	9.95235	weak	1	0.582197	0.0427924
chr19	48993574	chr19:48993574:A:G	A	G	SNV	SOX8	jaspar2022	MA0868.2	MA0868.2	aggaggaggAgggtgggat	0.502558	0.440234	4.61326	4.06067	weak	1	-0.552586	-0.0612367
chr9	63817506	chr9:63817506:C:T	C	T	SNV	ZNF24	jaspar2022	MA1124.1	MA1124.1	cagtagacagccTacctccctgtac	0.40798	0.462747	6.60161	7.44155	strong	1	0.839935	0.0535634
chr1	116152159	chr1:116152159:G:T	G	T	SNV	SP1	jaspar2022	MA0079.5	MA0079.5	gggaggccGccttgcgc	0.65994	0.575488	8.75691	7.64165	strong	1	-1.11526	-0.0841852
chr21	39385961	chr21:39385961:G:A	G	A	SNV	SOX8	jaspar2022	MA0868.2	MA0868.2	gagctgcacAcactgcgca	0.544009	0.742576	4.98078	6.74136	strong	1	1.76057	0.195104
chr13	31192535	chr13:31192535:T:C	T	C	SNV	ZNF24	jaspar2022	MA1124.1	MA1124.1	cttgagttgagaCgtggccagacta	0.411744	0.447653	6.65933	7.21005	weak	1	0.550719	0.0351198
chr19	34233214	chr19:34233214:A:C	A	C	SNV	TBR1	jaspar2022	MA0802.1	MA0802.1	cagacagcaCggaacggca	0.414284	0.523571	4.73406	5.93913	strong	1	1.20506	0.107667
chr5	160353538	chr5:160353538:T:C	T	C	SNV	ZEB1	jaspar2022	MA0103.3	MA0103.3	gccctgcaaaTggaggcacct	0.661696	0.510328	6.93824	5.37012	strong	1	-1.56812	-0.150161
chr20	19628817	chr20:19628817:C:A	C	A	SNV	CTCF	jaspar2022	MA1930.1	MA1930.1	aaattatacctgtaggcccagagatgatgcaacAgctgggaagatttgagaggcctgcagaatctcta	0.689081	0.751031	11.4436	12.4024	strong	1	0.958837	0.0589841
chr7	142459694	chr7:142459694:C:G	C	G	SNV	CTCF	jaspar2022	MA1929.1	MA1929.1	actgtggtccactgggaactaaagtactctgggCagtctgggagagcagcctaggagggaaagggtt	0.709279	0.647077	9.88759	9.09218	strong	1	-0.795404	-0.0584634
chr16	66977888	chr16:66977888:A:G	A	G	SNV	NFIC	jaspar2022	MA0161.2	MA0161.2	accccgccacGggatgaggtc	0.615945	0.746015	6.07264	7.31629	strong	1	1.24365	0.127623
chr6	31198066	chr6:31198066:C:T	C	T	SNV	NR2F1	jaspar2022	MA0017.2	MA0017.2	aacgcttgcggtCgccgagcgcagc	0.701156	0.556394	8.50301	6.78275	strong	1	-1.72025	-0.142709
chr7	53466597	chr7:53466597:A:G	A	G	SNV	NFIC	jaspar2022	MA0161.2	MA0161.2	tgtctgtttaGccatgatgct	0.605817	0.744837	5.97581	7.30503	strong	1	1.32922	0.136404
chr1	207866710	chr1:207866710:A:T	A	T	SNV	MEF2A	jaspar2022	MA0052.4	MA0052.4	tccaactcctacgcTactgccaactgccg	0.423322	0.552278	4.61277	5.92532	strong	1	1.31254	0.125215
chr2	197453301	chr2:197453301:A:C	A	C	SNV	MITF	jaspar2022	MA0620.3	MA0620.3	ttgcgcgagcgcacgggAaaagcgattggtcggtc	0.714781	0.635948	8.14626	7.27135	strong	1	-0.874908	-0.0773457
chr19	51334078	chr19:51334078:A:G	A	G	SNV	NR2F1	jaspar2022	MA1537.1	MA1537.1	ggaggtaggagggcAggatggatgaccta	0.7037	0.659868	13.0979	12.2857	strong	1	-0.812173	-0.0436931
chr5	37817060	chr5:37817060:C:T	C	T	SNV	SP1	jaspar2022	MA0079.5	MA0079.5	gtgaggtcCagcctcag	0.636604	0.547996	8.44874	7.2786	strong	1	-1.17014	-0.0883279
chr2	71373891	chr2:71373891:C:T	C	T	SNV	NFIC	jaspar2022	MA1527.1	MA1527.1	tgcggtggcacaatttTggctcattgccacctc	0.864414	0.979557	14.8871	16.8546	strong	1	1.96749	0.114363
chr11	66420082	chr11:66420082:G:C	G	C	SNV	MAZ	jaspar2022	MA1522.1	MA1522.1	cccgcccccgCcccgcgggga	0.724766	0.857687	9.72296	11.4909	strong	1	1.7679	0.132094
chr12	131454912	chr12:131454912:T:G	T	G	SNV	CTCF	jaspar2022	MA0139.1	MA0139.1	ttgtggccatgcagggcaGacacagcccggccatgca	0.533217	0.565349	7.45865	7.89222	weak	1	0.433565	0.0315155
chr16	9970923	chr16:9970923:G:A	G	A	SNV	SOX8	jaspar2022	MA0868.2	MA0868.2	gagagatgaAaggcttatt	0.457116	0.530792	4.21036	4.8636	weak	1	0.653237	0.0723907
chr11	36747215	chr11:36747215:T:C	T	C	SNV	CTCF	jaspar2022	MA0139.1	MA0139.1	gctgggtgctggggaatgCtctgggctgccatctgga	0.542896	0.586968	7.58924	8.18394	weak	1	0.594695	0.0432279
chr17	2399093	chr17:2399093:T:C	T	C	SNV	SOX8	jaspar2022	MA0868.2	MA0868.2	actcatcatTgaagcaaca	0.723475	0.653781	6.572	5.95407	weak	1	-0.617933	-0.0684784
chr4	7067650	chr4:7067650:G:C	G	C	SNV	CTCF	jaspar2022	MA1930.1	MA1930.1	ctctgcgcccgtgagcgccgagaccgtgaatgcCcgcgaggcgtcgccgcaggccctggaccacacgc	0.692703	0.739816	11.4996	12.2288	strong	1	0.729204	0.0448579
chr9	96341176	chr9:96341176:A:G	A	G	SNV	NR2F1	jaspar2022	MA0017.2	MA0017.2	gtaatgccagctGctcaggaggccg	0.596557	0.714958	7.26002	8.66703	strong	1	1.407	0.116722
chr21	32949943	chr21:32949943:G:C	G	C	SNV	NR2F2	jaspar2022	MA1111.1	MA1111.1	agcttgtcacCtgggactggt	0.636683	0.79211	6.64822	8.23756	strong	1	1.58934	0.153362
chr8	108443443	chr8:108443443:T:A	T	A	SNV	GATA4	jaspar2022	MA0482.2	MA0482.2	caccgcccaccTagctccgtcca	0.644407	0.499026	6.46563	5.05631	strong	1	-1.40932	-0.142172
chr16	1659718	chr16:1659718:A:G	A	G	SNV	NFIC	jaspar2022	MA0161.2	MA0161.2	gcaagctgccAagcgactctg	0.998783	0.857628	9.7331	8.38347	strong	1	-1.34964	-0.138499
chr19	12766150	chr19:12766150:G:C	G	C	SNV	SP1	jaspar2022	MA0079.5	MA0079.5	tcctccagGtggcgctg	0.721781	0.599768	9.57357	7.96229	strong	1	-1.61128	-0.121627
chr22	27409502	chr22:27409502:T:C	T	C	SNV	CTCF	jaspar2022	MA0139.1	MA0139.1	gaagcgaccacaagggagCagaggctgactgatccat	0.7681	0.826147	10.6281	11.4113	strong	1	0.783266	0.056935
chr2	64228540	chr2:64228540:G:A	G	A	SNV	MEIS2	jaspar2022	MA1640.1	MA1640.1	agtctgtgggagggAttctaccgagacga	0.49245	0.558557	5.26133	5.93299	weak	1	0.671663	0.0644703
chr11	65266403	chr11:65266403:T:C	T	C	SNV	CTCF	jaspar2022	MA1930.1	MA1930.1	cctgattctgcccttatcctcttttgtctccccCcagtggtgagctttgtaaggacaaggatgcttct	0.606118	0.64346	10.1595	10.7375	weak	1	0.577963	0.0355542
chr2	86221285	chr2:86221285:A:G	A	G	SNV	CTCF	jaspar2022	MA0139.1	MA0139.1	ccccaacagccagcaggaGgcagcacaacatgcaaag	0.808865	0.938804	11.1781	12.9315	strong	1	1.75334	0.127449
chr9	111525118	chr9:111525118:C:A	C	A	SNV	CTCF	jaspar2022	MA1930.1	MA1930.1	gggagcctatggaaagcgcggactttcggaaagCtgcacgagcgcgttcggggagtccggttcagcgc	0.524529	0.487908	8.89671	8.32991	weak	1	-0.566805	-0.0348677
chr4	138911023	chr4:138911023:A:C	A	C	SNV	SP1	jaspar2022	MA0079.5	MA0079.5	agggtacaCccgactga	0.480485	0.601993	6.38708	7.99168	strong	1	1.6046	0.121123
chr8	27311397	chr8:27311397:G:A	G	A	SNV	SP1	jaspar2022	MA0079.5	MA0079.5	atggcgagGgggaggga	0.891844	0.769831	11.8194	10.2081	strong	1	-1.61128	-0.121627
chr7	64794828	chr7:64794828:C:A	C	A	SNV	ZNF24	jaspar2022	MA1124.1	MA1124.1	agcagctctgcaCccgcagcgattg	0.457438	0.425821	7.36012	6.87522	weak	1	-0.484902	-0.0309226
chr3	167928203	chr3:167928203:G:C	G	C	SNV	CTCF	jaspar2022	MA0139.1	MA0139.1	gtagaggaaaagccactaGgcggggctctagagcctg	0.88858	0.748341	12.2538	10.3614	strong	1	-1.89233	-0.137552
chr1	236795232	chr1:236795232:G:T	G	T	SNV	SP1	jaspar2022	MA0079.5	MA0079.5	ggagctcgGgcagacca	0.624261	0.523216	8.28574	6.95136	strong	1	-1.33437	-0.100725
chr22	18987991	chr22:18987991:A:C	A	C	SNV	CTCF	jaspar2022	MA1930.1	MA1930.1	agggctccccctgcgggcatcccaggaggatgaCcacgccatactccctgcgcactgaagatccgggg	0.651673	0.756254	10.8646	12.4833	strong	1	1.61867	0.0995746
chr1	20480580	chr1:20480580:G:T	G	T	SNV	TCF12	jaspar2022	MA1648.1	MA1648.1	agccgacaggTcctcaaacca	0.581355	0.696418	5.05358	6.01751	strong	1	0.963931	0.112599
chr10	94363136	chr10:94363136:G:A	G	A	SNV	ZBTB7B	jaspar2022	MA0694.1	MA0694.1	cgggaagccggGcgggaggggcg	0.725435	0.666314	9.05417	8.32972	strong	1	-0.724451	-0.0583361
chr20	25145384	chr20:25145384:G:A	G	A	SNV	SP1	jaspar2022	MA0079.5	MA0079.5	tcctctagGaggagatg	0.674741	0.550008	8.95237	7.30517	strong	1	-1.64719	-0.124338
chr5	180313827	chr5:180313827:T:C	T	C	SNV	NFIC	jaspar2022	MA1527.1	MA1527.1	gtgctggccacgccgaCctccggccctgcgttg	0.49474	0.581913	8.57033	10.0599	strong	1	1.48955	0.0865822
chr16	1659718	chr16:1659718:A:G	A	G	SNV	NFIC	jaspar2022	MA1527.1	MA1527.1	aaactggcaagctgccAagcgactctggggaca	0.996724	0.881581	17.1479	15.1804	strong	1	-1.96749	-0.114363
chr5	35815744	chr5:35815744:G:C	G	C	SNV	CTCF	jaspar2022	MA1930.1	MA1930.1	gggtaaccagtgatcctgtttctgttcttgctcCccctacaggctgtttttaagcacagcagccagag	0.779236	0.883998	12.839	14.4604	strong	1	1.62147	0.0997467
chr3	36170953	chr3:36170953:A:G	A	G	SNV	NFIC	jaspar2022	MA1527.1	MA1527.1	gagctggcagtgagccAagatggtgccaccgca	0.996661	0.881518	17.1468	15.1793	strong	1	-1.96749	-0.114363
chr2	197453301	chr2:197453301:A:C	A	C	SNV	NR2F2	jaspar2022	MA1111.1	MA1111.1	agcgcacgggCaaagcgattg	0.560836	0.682936	5.87264	7.12118	strong	1	1.24854	0.120476
chr1	236775067	chr1:236775067:A:G	A	G	SNV	CTCF	jaspar2022	MA1930.1	MA1930.1	agggtcaagaattaggagacgtggacagtgaagGctgagccgtatgactcccaaatggaatcctgttg	0.549832	0.579082	9.28834	9.74106	weak	1	0.452717	0.0278495
chr3	31550877	chr3:31550877:C:T	C	T	SNV	CTCF	jaspar2022	MA1929.1	MA1929.1	catccttttgtttttgatcctgccactagatggCaggagcaataaaaggtagattgaaatgccaact	0.760165	0.728642	10.5383	10.1352	weak	1	-0.403086	-0.0296274
chr1	1659060	chr1:1659060:G:A	G	A	SNV	SP1	jaspar2022	MA0079.5	MA0079.5	gaactcgaGacaacgac	0.417692	0.376655	5.55784	5.01591	weak	1	-0.541927	-0.0409074
chr20	24721152	chr20:24721152:C:T	C	T	SNV	MEF2A	jaspar2022	MA0052.4	MA0052.4	cagcactgcagcttTtgttggcacaattc	0.549288	0.669405	5.89488	7.11746	strong	1	1.22258	0.116632
chr5	152349893	chr5:152349893:T:C	T	C	SNV	NFIC	jaspar2022	MA1527.1	MA1527.1	tgccacgagctgtaagCcttggcttctttggtg	0.53499	0.580528	9.25809	10.0362	strong	1	0.778122	0.0452294
chr16	10729912	chr16:10729912:C:G	C	G	SNV	SP1	jaspar2022	MA0079.5	MA0079.5	ggcgcaccCtatggcag	0.633577	0.575129	8.40877	7.63692	strong	1	-0.771854	-0.0582634
chr5	128736851	chr5:128736851:A:G	A	G	SNV	SOX8	jaspar2022	MA0868.2	MA0868.2	attccaacaAagccaggct	0.877561	0.692897	7.93818	6.30088	strong	1	-1.6373	-0.181443
chr5	21391680	chr5:21391680:G:C	G	C	SNV	CTCF	jaspar2022	MA0139.1	MA0139.1	atagggtgccacctggtgGaataagaaacactgaaaa	0.954319	0.873865	13.1408	12.0552	strong	1	-1.08561	-0.0789121
chr7	66413607	chr7:66413607:G:A	G	A	SNV	MEF2A	jaspar2022	MA0052.4	MA0052.4	gggctgcgggggagAggggcctgggtctt	0.230384	0.385239	2.64901	4.22515	strong	1	1.57614	0.150362
chrX	47650835	chrX:47650835:A:G	A	G	SNV	CREB1	jaspar2022	MA0018.4	MA0018.4	tgagcaactgaaGaggctcggggcc	0.444183	0.571338	4.71748	5.99591	strong	1	1.27844	0.124051
chr12	50283723	chr12:50283723:T:C	T	C	SNV	CTCF	jaspar2022	MA1930.1	MA1930.1	ttgctgcccggggcctagtctacctcggcacgcCtttctctgaaggagacacgcacttgcacgacgtg	0.629952	0.664275	10.5284	11.0596	weak	1	0.531247	0.0326804
chr1	109761309	chr1:109761309:G:C	G	C	SNV	SP4	jaspar2022	MA0685.2	MA0685.2	ccctccccCtccctgac	0.850513	0.933588	11.105	12.1879	strong	1	1.08298	0.0829635
chr1	109761309	chr1:109761309:G:C	G	C	SNV	CTCF	jaspar2022	MA0139.1	MA0139.1	atctgaccacccctccccCtccctgacactgagcaga	0.611952	0.700151	8.52106	9.71117	strong	1	1.19011	0.0865084
chr11	85628498	chr11:85628498:G:T	G	T	SNV	EGR1	jaspar2022	MA0162.4	MA0162.4	cttttgactgagtGggggcgggcccgg	0.917138	0.75681	9.43699	7.8411	strong	1	-1.59589	-0.155518
chr18	58554552	chr18:58554552:T:C	T	C	SNV	NFIC	jaspar2022	MA1527.1	MA1527.1	ggggatgtcccctcccTggcagcctgccaaggg	0.997158	0.880373	17.1553	15.1598	strong	1	-1.99554	-0.115994
chr4	7068348	chr4:7068348:G:T	G	T	SNV	SP1	jaspar2022	MA0079.5	MA0079.5	cagcgccgGggtggggc	0.937248	0.789684	12.419	10.4703	strong	1	-1.94869	-0.147097
chr10	124567617	chr10:124567617:G:C	G	C	SNV	CTCF	jaspar2022	MA1929.1	MA1929.1	ccacagggcaacgctctggcttgacaaggggcgGcactgctggtcagcagcccagccagccgcagcg	0.766345	0.710129	10.6173	9.89845	strong	1	-0.718856	-0.052837
chr17	35171623	chr17:35171623:A:C	A	C	SNV	CTCF	jaspar2022	MA1930.1	MA1930.1	catacattgaatatgttaatggtaaactttcccAccagatggtgctcatgctttttctttgtttttat	0.800536	0.764474	13.1686	12.6105	weak	1	-0.558151	-0.0343354
chr6	56279560	chr6:56279560:T:C	T	C	SNV	MEF2A	jaspar2022	MA0052.4	MA0052.4	ccattccattccaaTtgtcagatttgata	0.641544	0.537249	6.83389	5.77235	strong	1	-1.06154	-0.10127
chr9	63817564	chr9:63817564:T:G	T	G	SNV	TBR1	jaspar2022	MA0802.1	MA0802.1	tgctttcttGtcattgttg	0.547544	0.584234	6.20347	6.60805	weak	1	0.404577	0.036147
chr9	127348293	chr9:127348293:C:G	C	G	SNV	CTCF	jaspar2022	MA0139.1	MA0139.1	gtggctctaaggctccccCtttatgcctgagatggaa	0.693074	0.603244	9.61568	8.40356	strong	1	-1.21212	-0.0881077
chr3	63015745	chr3:63015745:A:G	A	G	SNV	ZNF24	jaspar2022	MA1124.1	MA1124.1	agcctacagctaAagatggctgcca	0.504779	0.473864	8.08617	7.61203	weak	1	-0.474141	-0.0302364
chr5	179894140	chr5:179894140:G:C	G	C	SNV	CTCF	jaspar2022	MA0139.1	MA0139.1	gccagttcagcagaagagGgcagggcaggcacgcgga	0.846833	0.715118	11.6904	9.91313	strong	1	-1.77731	-0.129191
chr10	35917002	chr10:35917002:T:G	T	G	SNV	CTCF	jaspar2022	MA0139.1	MA0139.1	agggaggctccctccagtGgtacttgtttatgctgag	0.696939	0.7947	9.66783	10.987	strong	1	1.31915	0.0958876
chr19	38769949	chr19:38769949:C:G	C	G	SNV	CREB1	jaspar2022	MA0018.4	MA0018.4	aagggcggggatGcaggcccaagcc	0.439354	0.54956	4.66893	5.77695	strong	1	1.10802	0.107515
chr21	39183785	chr21:39183785:C:G	C	G	SNV	NR3C1	jaspar2022	MA0113.3	MA0113.3	cttggattacaggcctGagccaccgcgtccggc	0.591104	0.621873	10.216	10.7414	weak	1	0.525441	0.0305513
chr19	56839696	chr19:56839696:A:G	A	G	SNV	CLOCK	jaspar2022	MA0819.2	MA0819.2	ggggctggaGcagaccatt	0.407941	0.488338	4.01052	4.78934	strong	1	0.778815	0.0799121
chr16	3432002	chr16:3432002:G:T	G	T	SNV	NR2F1	jaspar2022	MA0017.2	MA0017.2	gctgtagcgcaaGtcatctcgttga	0.738323	0.633956	8.94468	7.70445	strong	1	-1.24023	-0.102887
chrX	103310978	chrX:103310978:C:A	C	A	SNV	MEF2A	jaspar2022	MA0052.4	MA0052.4	ttctgacgccacaaAgaggtaagactcag	0.567302	0.704519	6.07824	7.47486	strong	1	1.39662	0.133236
chr3	108406767	chr3:108406767:C:T	C	T	SNV	CTCF	jaspar2022	MA1929.1	MA1929.1	agaagtggagaaaatgcgaatagaatgtgttgcCatctagtggtactaagtggtttgagcattatgg	0.672972	0.563228	9.42331	8.01997	strong	1	-1.40335	-0.103148
chr10	101013083	chr10:101013083:T:C	T	C	SNV	CTCF	jaspar2022	MA0139.1	MA0139.1	acagagacagagcatgccCtggtggtcagagtgagtc	0.591352	0.730815	8.24309	10.1249	strong	1	1.88185	0.13679
chr16	31159853	chr16:31159853:C:T	C	T	SNV	CTCF	jaspar2022	MA0139.1	MA0139.1	agacatccccttggtgctCcctctcgtggcaagaaga	0.902437	0.831965	12.4407	11.4898	strong	1	-0.950917	-0.0691214
chr3	48960696	chr3:48960696:A:C	A	C	SNV	NR2F1	jaspar2022	MA0017.2	MA0017.2	agcctgggagacCgaggttgcagtg	0.615009	0.684437	7.4793	8.30433	strong	1	0.825031	0.068443
chr19	47776897	chr19:47776897:G:A	G	A	SNV	SP1	jaspar2022	MA0079.5	MA0079.5	ttcatgggGagtgacta	0.784765	0.663001	10.4053	8.79733	strong	1	-1.608	-0.121379
chrX	54921940	chrX:54921940:A:G	A	G	SNV	SP1	jaspar2022	MA0079.5	MA0079.5	gtgggcctGagatgggg	0.576084	0.683163	7.64953	9.06359	strong	1	1.41406	0.10674
chr2	178480456	chr2:178480456:C:T	C	T	SNV	NR3C1	jaspar2022	MA0113.3	MA0113.3	acgatccggcccctttTatccaggaagtgaaat	0.513292	0.6067	8.88716	10.4823	strong	1	1.59512	0.092747
chr19	8320673	chr19:8320673:G:A	G	A	SNV	NR2F1	jaspar2022	MA1538.1	MA1538.1	cgcccggcctcgctGtttcaggagggctg	0.439213	0.395182	7.25532	6.54403	strong	1	-0.711281	-0.0435984
chr7	41940870	chr7:41940870:A:G	A	G	SNV	CTCF	jaspar2022	MA1930.1	MA1930.1	gtaagacccaaaacacctaggaaggacatttgtGaggtgactaagcctgagctccgcctgtctctttg	0.483191	0.532434	8.2569	9.01906	strong	1	0.762159	0.0468852
chr2	197453301	chr2:197453301:A:C	A	C	SNV	ZNF143	jaspar2022	MA0088.2	MA0088.2	gcgcgagcgcacgggCaaagcgattggtcgg	0.455822	0.479129	8.92022	9.37341	weak	1	0.453191	0.0232386
chr9	113991099	chr9:113991099:A:G	A	G	SNV	RELB	jaspar2022	MA1117.1	MA1117.1	tcagtggggaAagctctgggc	0.887275	0.77596	7.98381	7.01237	strong	1	-0.971439	-0.108328
chr1	7771253	chr1:7771253:T:C	T	C	SNV	SP4	jaspar2022	MA0685.2	MA0685.2	ccgcccacCcccccggc	0.85959	0.89766	11.2233	11.7196	weak	1	0.496289	0.038019
chr3	10287098	chr3:10287098:G:A	G	A	SNV	CTCF	jaspar2022	MA0139.1	MA0139.1	gctgtggtgccccctagtGtgagattttttttctccc	0.890895	0.75229	12.285	10.4147	strong	1	-1.87027	-0.135949
chr10	30752051	chr10:30752051:A:G	A	G	SNV	CTCF	jaspar2022	MA0139.1	MA0139.1	acaggccaccagcagaggGggccgcaggctcggacag	0.819707	0.890178	11.3244	12.2753	strong	1	0.950917	0.0691214
chrX	155864845	chrX:155864845:C:T	C	T	SNV	CTCF	jaspar2022	MA0139.1	MA0139.1	agtccacattctattactCcccttggtgtctatctgt	0.702233	0.636631	9.73927	8.85406	strong	1	-0.885212	-0.0643453
chr7	75572587	chr7:75572587:C:A	C	A	SNV	MEF2A	jaspar2022	MA0052.4	MA0052.4	atggcctgccactgAcatcatgccagctg	0.422951	0.490454	4.609	5.29606	weak	1	0.687057	0.0655443
chr1	16913903	chr1:16913903:T:G	T	G	SNV	MAZ	jaspar2022	MA1522.1	MA1522.1	gcgcctggctGgccgggcggt	0.561685	0.70494	7.55392	9.45928	strong	1	1.90536	0.142364
chr15	85825917	chr15:85825917:A:G	A	G	SNV	OLIG2	jaspar2022	MA0678.1	MA0678.1	gcagccactAtttattgat	0.574052	0.538056	6.59635	6.18724	weak	1	-0.409108	-0.0357693
chr22	22810153	chr22:22810153:G:A	G	A	SNV	CTCF	jaspar2022	MA1930.1	MA1930.1	aagctctcctaggctcagtcttgtccaccagcaGggggcagcagagctgcagccaggagcagccagag	0.752392	0.662308	12.4235	11.0292	strong	1	-1.39427	-0.0857705
chr6	44246588	chr6:44246588:C:T	C	T	SNV	ZEB1	jaspar2022	MA0103.3	MA0103.3	tcctctactcCtgcgagagtc	0.814693	0.657901	8.52323	6.89892	strong	1	-1.62431	-0.155541
chrX	119871742	chrX:119871742:C:G	C	G	SNV	NR3C1	jaspar2022	MA0113.3	MA0113.3	agaggactgcgagagcCcgagcgcccgtctctc	0.645754	0.614985	11.1492	10.6238	weak	1	-0.525441	-0.0305513
chr8	27311444	chr8:27311444:G:A	G	A	SNV	SP1	jaspar2022	MA0079.5	MA0079.5	cggtgtgcGcgggaaat	0.668068	0.586316	8.86425	7.78465	strong	1	-1.0796	-0.0814933
chr19	39349535	chr19:39349535:A:G	A	G	SNV	SP1	jaspar2022	MA0079.5	MA0079.5	tggtgtacGtgttttgt	0.438753	0.483973	5.83596	6.43313	weak	1	0.597169	0.0450773
chr5	674806	chr5:674806:C:T	C	T	SNV	OLIG2	jaspar2022	MA0678.1	MA0678.1	ctggtctgtTctccaggca	0.476916	0.52724	5.49236	6.06432	weak	1	0.571961	0.0500079
chr11	72041114	chr11:72041114:T:G	T	G	SNV	NEUROD1	jaspar2022	MA1109.1	MA1109.1	gcaggagcgatcTtcctggctgaca	0.658986	0.576874	7.34354	6.44664	strong	1	-0.896901	-0.0810327
chr12	131454915	chr12:131454915:A:G	A	G	SNV	CTCF	jaspar2022	MA0139.1	MA0139.1	tggccatgcagggcatacGcagcccggccatgcagca	0.533217	0.569091	7.45865	7.94271	weak	1	0.484062	0.035186
chr1	16913942	chr1:16913942:A:G	A	G	SNV	ZEB1	jaspar2022	MA0103.3	MA0103.3	gggcgcacggGgcgtgtccgc	0.537514	0.688789	5.65176	7.21891	strong	1	1.56715	0.150068
chr1	16644816	chr1:16644816:G:A	G	A	SNV	CREB1	jaspar2022	MA0018.4	MA0018.4	tggcttcccaccAggttgttccagg	0.490719	0.6309	5.18536	6.59476	strong	1	1.4094	0.136758
chr10	97154647	chr10:97154647:G:C	G	C	SNV	NR2F1	jaspar2022	MA1538.1	MA1538.1	tccctctgttggctGccaaccagccccct	0.524732	0.488572	8.63681	8.05267	weak	1	-0.584136	-0.035805
chr20	63254850	chr20:63254850:C:T	C	T	SNV	CTCF	jaspar2022	MA1929.1	MA1929.1	cctgcccagcacctgctcccgccgtgcgccctcTggcgtgagatccccatcaaccttccccgtgtgg	0.661787	0.707316	9.28029	9.86248	weak	1	0.582197	0.0427924
chr1	111197723	chr1:111197723:C:G	C	G	SNV	CTCF	jaspar2022	MA1929.1	MA1929.1	cagagagagcacagaccagagcctgaccagcagGgggagaaggggcatcaggtcctcgtgcttgtgg	0.69887	0.738557	9.75448	10.262	weak	1	0.507504	0.0373023
chr19	20278569	chr19:20278569:A:G	A	G	SNV	CTCF	jaspar2022	MA0139.1	MA0139.1	cctacatcaccacctagtGgacagggtggtgcattac	0.764068	0.902673	10.5737	12.4439	strong	1	1.87027	0.135949
chr3	197627986	chr3:197627986:C:A	C	A	SNV	NR2F1	jaspar2022	MA0017.2	MA0017.2	gggtctaaggggAggggacgccgcg	0.58317	0.644911	7.10094	7.83463	strong	1	0.733692	0.0608657
chr10	100346541	chr10:100346541:G:C	G	C	SNV	BHLHE41	jaspar2022	MA0636.1	MA0636.1	ccggagtccCgtgcggtcc	0.672652	0.810861	9.7073	11.6975	strong	1	1.9902	0.138006
chr9	62799760	chr9:62799760:T:G	T	G	SNV	ZEB1	jaspar2022	MA0103.3	MA0103.3	ggctggaacaGgggggcaggg	0.685	0.810084	7.17966	8.47548	strong	1	1.29582	0.124086
chr1	200939477	chr1:200939477:A:C	A	C	SNV	NFIC	jaspar2022	MA0161.2	MA0161.2	ggctcactgcCaactgcatat	0.703615	0.869688	6.91089	8.49877	strong	1	1.58788	0.162947
chrX	153610153	chrX:153610153:C:T	C	T	SNV	CTCF	jaspar2022	MA0139.1	MA0139.1	ccacccccaccccatcccCctgctgctgggagcccca	0.818852	0.773772	11.3129	10.7046	weak	1	-0.608294	-0.0442164
chr21	39385961	chr21:39385961:G:A	G	A	SNV	CTCF	jaspar2022	MA1929.1	MA1929.1	ctggcgctggctcagggtccctgcgagctgcacAcactgcgcaggcgccccagagctggtgtgggct	0.587057	0.631775	8.32468	8.89651	weak	1	0.571826	0.0420301
chr13	52738977	chr13:52738977:C:T	C	T	SNV	CTCF	jaspar2022	MA1930.1	MA1930.1	cgcgcccctcgccggcccgcgctcgggctccccCtaggggcaccatgggcgacacgggggtccccgcg	0.68809	0.641229	11.4282	10.703	strong	1	-0.725282	-0.0446167
chr19	1490704	chr19:1490704:G:A	G	A	SNV	NEUROD1	jaspar2022	MA1109.1	MA1109.1	gcccggcctcctGtccggcctaatc	0.756891	0.656549	8.41294	7.31692	strong	1	-1.09602	-0.0990226
chr9	4662369	chr9:4662369:A:C	A	C	SNV	SP1	jaspar2022	MA0079.5	MA0079.5	gggccgccCgctgcgat	0.654422	0.760995	8.68405	10.0914	strong	1	1.40738	0.106236
chr9	111525118	chr9:111525118:C:A	C	A	SNV	OLIG2	jaspar2022	MA0678.1	MA0678.1	ttcggaaagAtgcacgagc	0.44786	0.623374	5.16213	7.15692	strong	1	1.99479	0.174409
chr16	84175443	chr16:84175443:C:T	C	T	SNV	CTCF	jaspar2022	MA1929.1	MA1929.1	ggggaattctctcagagtgacgtgaccctactcCacccagaggccattactggcattaccaggagcc	0.765155	0.655411	10.6021	9.19875	strong	1	-1.40335	-0.103148
chr9	129141644	chr9:129141644:G:T	G	T	SNV	SP1	jaspar2022	MA0079.5	MA0079.5	tctcttccGtcctggag	0.640443	0.600557	8.49944	7.97271	weak	1	-0.526731	-0.0397602
chr11	94603265	chr11:94603265:T:C	T	C	SNV	CTCF	jaspar2022	MA1929.1	MA1929.1	ttagtatctgcagtcatggggttgatggtcctgCcacctgctgggcgagttttaaaaagccgctggg	0.810307	0.866903	11.1795	11.9032	strong	1	0.72372	0.0531945
chr5	180313827	chr5:180313827:T:C	T	C	SNV	MEF2A	jaspar2022	MA0052.4	MA0052.4	gctggccacgccgaTctccggccctgcgt	0.504256	0.367309	5.43654	4.04266	strong	1	-1.39388	-0.132975
chr17	73513642	chr17:73513642:T:C	T	C	SNV	SOX8	jaspar2022	MA0868.2	MA0868.2	aaatgacagTacttcagag	0.736104	0.618255	6.68397	5.63907	strong	1	-1.0449	-0.115794
chr3	71973490	chr3:71973490:A:G	A	G	SNV	CTCF	jaspar2022	MA0139.1	MA0139.1	cgggagcagccagctgtcGctgtcgtgtcatgaggac	0.657078	0.713755	9.12997	9.89475	strong	1	0.764774	0.0555908
chr7	142323873	chr7:142323873:A:G	A	G	SNV	CTCF	jaspar2022	MA1930.1	MA1930.1	cccactatgctgcagggaaccctggggaggggtAggagggtggccaggaagggagggcggaagggaat	0.684246	0.628334	11.3687	10.5034	strong	1	-0.865379	-0.0532349
chr20	48635976	chr20:48635976:C:T	C	T	SNV	SP1	jaspar2022	MA0079.5	MA0079.5	gcagagggCgctccaag	0.662879	0.600126	8.79572	7.96703	strong	1	-0.828693	-0.0625538
chr3	75785697	chr3:75785697:G:C	G	C	SNV	SP1	jaspar2022	MA0079.5	MA0079.5	cggtccccCgttaggaa	0.575007	0.65994	7.6353	8.75691	strong	1	1.12161	0.0846647
chr8	27311444	chr8:27311444:G:A	G	A	SNV	MAZ	jaspar2022	MA1522.1	MA1522.1	tccggtgtgcAcgggaaatct	0.577869	0.70406	7.76918	9.44757	strong	1	1.6784	0.125406
chr4	119862029	chr4:119862029:G:A	G	A	SNV	NFIC	jaspar2022	MA0161.2	MA0161.2	cctggaaaaaGtccagattat	0.591208	0.546022	5.83613	5.40408	weak	1	-0.432041	-0.0443358
chr17	28747547	chr17:28747547:G:C	G	C	SNV	CTCF	jaspar2022	MA0139.1	MA0139.1	caagccagacctgtggctGagggccagtatccctcca	0.611761	0.55741	8.51848	7.78509	strong	1	-0.73339	-0.0533095
chr12	9319419	chr12:9319419:C:T	C	T	SNV	CTCF	jaspar2022	MA1930.1	MA1930.1	ccacgctggtgcccactcttctgctccccctgcTggattcctcagccccttctaccctgatggttctc	0.6886	0.721113	11.4361	11.9394	weak	1	0.503231	0.0309569
chr9	133200162	chr9:133200162:C:T	C	T	SNV	CTCF	jaspar2022	MA0139.1	MA0139.1	gacggcagcggaagccacTgcgggcgccaaaccagta	0.660726	0.698633	9.1792	9.69069	weak	1	0.511492	0.0371799
chr13	23579314	chr13:23579314:T:G	T	G	SNV	SP1	jaspar2022	MA0079.5	MA0079.5	gtgggcggGgccctgag	0.85045	0.883901	11.2728	11.7145	weak	1	0.441742	0.0333448
chr9	40992221	chr9:40992221:A:G	A	G	SNV	CREM	jaspar2022	MA0609.2	MA0609.2	ccctctgcagccgccAtagctccccagcaga	0.539939	0.481753	5.52654	4.9685	weak	1	-0.558042	-0.0561479
chr2	231388679	chr2:231388679:A:G	A	G	SNV	SP1	jaspar2022	MA0079.5	MA0079.5	agctgtccGgggcgagg	0.770908	0.892921	10.2223	11.8336	strong	1	1.61128	0.121627
chr2	48727703	chr2:48727703:A:G	A	G	SNV	CTCF	jaspar2022	MA1930.1	MA1930.1	gcttctcagctaagtccagactatgtcttttgcActtactcattattttggatttctctgtaattggt	0.580244	0.530327	9.75905	8.98645	strong	1	-0.772596	-0.0475273
chr8	140598961	chr8:140598961:C:G	C	G	SNV	CTCF	jaspar2022	MA1930.1	MA1930.1	atctgctcaatgacagaaacgcgacaacagaggGcactttctccaaacccagctctccctcgaggctc	0.689824	0.74179	11.4551	12.2594	strong	1	0.804312	0.0494783
chr19	36973405	chr19:36973405:G:A	G	A	SNV	CTCF	jaspar2022	MA1930.1	MA1930.1	atgtgcgggctgcatgcccacgcttcaccgctaGgggaggtcagggctgtgcgatggggaaggaagag	0.677022	0.617058	11.2569	10.3288	strong	1	-0.928089	-0.0570927
chr21	10429648	chr21:10429648:T:A	T	A	SNV	BHLHE40	jaspar2022	MA0464.2	MA0464.2	aaggagacaTggacattga	0.624712	0.507992	7.38036	6.01827	strong	1	-1.3621	-0.115826
chr9	67724120	chr9:67724120:A:G	A	G	SNV	SRF	jaspar2022	MA0083.3	MA0083.3	actcctggcatccggAgacgttcccttcgac	0.52598	0.486806	10.1573	9.41521	strong	1	-0.742041	-0.0387769
chr17	48025362	chr17:48025362:G:A	G	A	SNV	SOX8	jaspar2022	MA0868.2	MA0868.2	ggagccgggAtggaacgtg	0.440221	0.499688	4.06056	4.58782	weak	1	0.527254	0.0584295
chrX	41442419	chrX:41442419:C:T	C	T	SNV	SP1	jaspar2022	MA0079.5	MA0079.5	cgccccttCtccccagg	0.831324	0.683761	11.0202	9.07149	strong	1	-1.94869	-0.147097
chr3	29426947	chr3:29426947:T:C	T	C	SNV	NFIC	jaspar2022	MA0161.2	MA0161.2	agtgaaataaCcataattcct	0.412091	0.47572	4.12352	4.7319	weak	1	0.608378	0.0624314
chr1	109283514	chr1:109283514:C:T	C	T	SNV	CTCF	jaspar2022	MA1930.1	MA1930.1	agtctccagaacggttgtgctgcctaacgtggcCgctaaccgacgctctacgggaggaaattcgtttt	0.644786	0.617184	10.758	10.3308	weak	1	-0.427214	-0.0262806
chr17	15699586	chr17:15699586:T:G	T	G	SNV	TBR1	jaspar2022	MA0802.1	MA0802.1	cttcgatcgTccgattctc	0.553099	0.450583	6.26473	5.13432	strong	1	-1.13041	-0.100997
chr17	45585365	chr17:45585365:G:C	G	C	SNV	CTCF	jaspar2022	MA1930.1	MA1930.1	gcttggtggcgcggttgagagagacgcgcagctGgcgaaatgccccgcgtctaaggccttcggagacc	0.658096	0.542085	10.964	9.16844	strong	1	-1.79557	-0.110457
chr8	61756663	chr8:61756663:G:C	G	C	SNV	CTCF	jaspar2022	MA0139.1	MA0139.1	gctgccctgctgcatggcGccgcttgctggtggatgg	0.807918	0.769113	11.1653	10.6417	weak	1	-0.523623	-0.0380617
chr18	72941204	chr18:72941204:A:T	A	T	SNV	NFIC	jaspar2022	MA0161.2	MA0161.2	tctggcagccTgccagggcat	0.746162	0.855034	7.31769	8.35866	strong	1	1.04097	0.106824
chr19	40570843	chr19:40570843:C:G	C	G	SNV	CTCF	jaspar2022	MA0139.1	MA0139.1	aggccctccagcaggtggCggtagtaggtggggccag	0.956025	0.892573	13.1638	12.3076	strong	1	-0.856183	-0.0622352
chr22	19179566	chr22:19179566:G:A	G	A	SNV	CTCF	jaspar2022	MA1929.1	MA1929.1	gaggtccggtacctccaaacaagacgtgttcatGtagtcttcaaactggcctggagggggcagctcc	0.866092	0.760989	11.8928	10.5488	strong	1	-1.344	-0.098786
chrX	47650835	chrX:47650835:A:G	A	G	SNV	NFIC	jaspar2022	MA0161.2	MA0161.2	agcaactgaaAaggctcgggg	0.677554	0.536399	6.66171	5.31207	strong	1	-1.34964	-0.138499
chr11	60251677	chr11:60251677:C:T	C	T	SNV	CTCF	jaspar2022	MA1929.1	MA1929.1	aaaaacccaaccgtcctcaggacactttgctgcCatctgctgggaaattgtgaaaagtacacaaaaa	0.686652	0.638333	9.59824	8.98037	weak	1	-0.617875	-0.0454148
chr19	53978426	chr19:53978426:C:T	C	T	SNV	SOX8	jaspar2022	MA0868.2	MA0868.2	tcccgccccTtcctctcac	0.452138	0.509172	4.16622	4.6719	weak	1	0.505686	0.0560393
chr22	19121035	chr22:19121035:T:C	T	C	SNV	NEUROD1	jaspar2022	MA1109.1	MA1109.1	agacattccacaCagatgacacaag	0.739691	0.903766	8.22507	10.0172	strong	1	1.79216	0.161917
chrX	71254216	chrX:71254216:C:T	C	T	SNV	NR2F1	jaspar2022	MA1537.1	MA1537.1	accaaccccattggCtggctcgaggaggg	0.532304	0.508773	9.92207	9.48606	weak	1	-0.436008	-0.0234563
chr14	54699397	chr14:54699397:A:G	A	G	SNV	CREB1	jaspar2022	MA0018.4	MA0018.4	cttgctgaggtcAtctgtgccctcc	0.948242	0.793989	9.78537	8.23449	strong	1	-1.55088	-0.150487
chr19	53554523	chr19:53554523:C:G	C	G	SNV	MAZ	jaspar2022	MA1522.1	MA1522.1	ccatgggtggGgggaccgact	0.725163	0.852921	9.72825	11.4275	strong	1	1.69923	0.126962
chr9	63817564	chr9:63817564:T:G	T	G	SNV	NFIC	jaspar2022	MA0161.2	MA0161.2	atgctttcttGtcattgttga	0.678537	0.84461	6.67111	8.25899	strong	1	1.58788	0.162947
chr9	62799760	chr9:62799760:T:G	T	G	SNV	SP1	jaspar2022	MA0079.5	MA0079.5	ctggaacaGgggggcag	0.702233	0.818332	9.31542	10.8486	strong	1	1.53318	0.115732
chr14	100291297	chr14:100291297:T:G	T	G	SNV	OLIG2	jaspar2022	MA0678.1	MA0678.1	tcacagggaTgaagccctg	0.489386	0.378441	5.63409	4.37316	strong	1	-1.26093	-0.110246
chr18	4679298	chr18:4679298:T:C	T	C	SNV	NFIC	jaspar2022	MA1527.1	MA1527.1	ctggcagtaggccaacTggtgcaaaaacagagc	0.609921	0.494517	10.5385	8.56651	strong	1	-1.97195	-0.114623
chr7	73683589	chr7:73683589:C:A	C	A	SNV	ZNF384	jaspar2022	MA1125.1	MA1125.1	ccgggtgccggAaggcgccagtc	0.181768	0.322996	2.38546	4.11609	strong	1	1.73063	0.13943
chrX	11111210	chrX:11111210:G:A	G	A	SNV	PKNOX1	jaspar2022	MA0782.2	MA0782.2	ggcgaggaggggacAgaacccgctctccg	0.521752	0.580146	5.78919	6.4022	weak	1	0.613012	0.0567092
chr8	110892992	chr8:110892992:A:G	A	G	SNV	CTCF	jaspar2022	MA0139.1	MA0139.1	ggtggtcacctgcagaggGtgcactttccccttcttt	0.767222	0.837694	10.6162	11.5671	strong	1	0.950917	0.0691214
chr7	112450312	chr7:112450312:G:T	G	T	SNV	ZNF143	jaspar2022	MA0088.2	MA0088.2	agactggccgcatggGatttgtaggtaggat	0.636166	0.545888	12.427	10.6715	strong	1	-1.75543	-0.0900148
chr9	96341176	chr9:96341176:A:G	A	G	SNV	NR2F1	jaspar2022	MA1537.1	MA1537.1	ctgtaatgccagctGctcaggaggccgag	0.432278	0.52218	8.06865	9.73447	strong	1	1.66582	0.0896174
chr19	48568499	chr19:48568499:A:G	A	G	SNV	NFIC	jaspar2022	MA1527.1	MA1527.1	cagtcacactcctgccAagagagtatctctgcg	0.557567	0.489635	9.64388	8.4831	strong	1	-1.16078	-0.0674719
chr6	31152220	chr6:31152220:G:T	G	T	SNV	NFIC	jaspar2022	MA1527.1	MA1527.1	cccgggaggcggagctGgcagtgagccaagatc	0.996661	0.881079	17.1468	15.1718	strong	1	-1.97499	-0.114799
chr17	7836852	chr17:7836852:T:C	T	C	SNV	BHLHE41	jaspar2022	MA0636.1	MA0636.1	tgttagaggTggcctggga	0.572702	0.540715	8.26803	7.80742	weak	1	-0.460606	-0.0319398
chr18	46398203	chr18:46398203:A:G	A	G	SNV	NR2F1	jaspar2022	MA0017.2	MA0017.2	tggtcatgcagaGgtgtgagggtgt	0.57428	0.659507	6.99531	8.00809	strong	1	1.01278	0.0840184
chr5	20833379	chr5:20833379:A:C	A	C	SNV	CTCF	jaspar2022	MA0139.1	MA0139.1	tctcatcgcatccaggacCagagtatggggccagttt	0.597562	0.628644	8.32689	8.7463	weak	1	0.41941	0.0304865
chrX	74536363	chrX:74536363:C:G	C	G	SNV	CTCF	jaspar2022	MA1930.1	MA1930.1	gcctgggggtggatttggccctggcggtcgctcGtggtcctgccgctggcctccggccaccttgggcg	0.63808	0.664615	10.6542	11.0649	weak	1	0.41071	0.0252653
chr8	119076828	chr8:119076828:C:T	C	T	SNV	NFIC	jaspar2022	MA0161.2	MA0161.2	ggtgaccaaaTgacaggacaa	0.618793	0.700554	6.09987	6.88162	strong	1	0.78175	0.0802228
chr2	128293295	chr2:128293295:C:G	C	G	SNV	RELB	jaspar2022	MA1117.1	MA1117.1	cataagcctgCccaagggcca	0.633426	0.571371	5.76849	5.22694	weak	1	-0.541555	-0.0603905
chrX	28847457	chrX:28847457:T:C	T	C	SNV	ZNF24	jaspar2022	MA1124.1	MA1124.1	agcctctacttaCaatggtctttta	0.479429	0.521489	7.69738	8.34244	weak	1	0.645055	0.0411357
chrX	23667305	chrX:23667305:A:G	A	G	SNV	MEF2A	jaspar2022	MA0052.4	MA0052.4	gcggaggtcaggagAccttgtcgctgcct	0.471156	0.390357	5.09964	4.27725	strong	1	-0.822392	-0.0784551
chr10	85646583	chr10:85646583:G:A	G	A	SNV	SP1	jaspar2022	MA0079.5	MA0079.5	atctaacaGtgctgaag	0.513332	0.391319	6.82084	5.20956	strong	1	-1.61128	-0.121627
chr9	136947273	chr9:136947273:C:T	C	T	SNV	NFIC	jaspar2022	MA0161.2	MA0161.2	agctgtctccTgtcactgccc	0.559441	0.700596	5.53238	6.88202	strong	1	1.34964	0.138499
chr9	130893782	chr9:130893782:G:A	G	A	SNV	CTCF	jaspar2022	MA1929.1	MA1929.1	ggcgtctgtgggctctcttctgtccagtagaggGaagcaggcgcccagcggcaggaagaggaagtag	0.804342	0.747745	11.1032	10.3795	strong	1	-0.72372	-0.0531945
chr16	10201500	chr16:10201500:C:T	C	T	SNV	ZKSCAN1	jaspar2022	MA1585.1	MA1585.1	aacccaccaTggatgtgca	0.646741	0.689842	8.21658	8.75472	weak	1	0.538137	0.0426175
chr19	12766150	chr19:12766150:G:C	G	C	SNV	NR2F2	jaspar2022	MA1111.1	MA1111.1	catcctccagGtggcgctgca	0.636677	0.530096	6.64816	5.55831	strong	1	-1.08986	-0.105164
chr17	59324349	chr17:59324349:G:A	G	A	SNV	CTCF	jaspar2022	MA1930.1	MA1930.1	tagagtgcagtgacacgatctcagctcactgcaGccctctgcagttcaagtgattcgagtgcctcaga	0.8088	0.781198	13.2965	12.8693	weak	1	-0.427214	-0.0262806
chr8	143597129	chr8:143597129:G:A	G	A	SNV	MEF2A	jaspar2022	MA0052.4	MA0052.4	gcccccgtcccgcgAacgccctccaagcc	0.249646	0.325588	2.84506	3.61802	strong	1	0.772956	0.0737389
chr3	126146923	chr3:126146923:C:A	C	A	SNV	NR2F1	jaspar2022	MA1537.1	MA1537.1	gatccgctgccaaaAactctgcaaagcaa	0.416812	0.462512	7.78208	8.62887	strong	1	0.846787	0.0455552
chr9	124217298	chr9:124217298:G:C	G	C	SNV	SOX8	jaspar2022	MA0868.2	MA0868.2	acacagagaCagagagaga	0.468109	0.637507	4.30783	5.80977	strong	1	1.50194	0.166443
chr19	53978426	chr19:53978426:C:T	C	T	SNV	SP1	jaspar2022	MA0079.5	MA0079.5	cccgccccCtcctctca	0.81255	0.690537	10.7723	9.16097	strong	1	-1.61128	-0.121627
chr2	241732746	chr2:241732746:C:T	C	T	SNV	CTCF	jaspar2022	MA1930.1	MA1930.1	ctaggtaacgggtgtcttcccagacgctggcgtTaccgctagaccaaggagccctctggtggccctgt	0.620993	0.67091	10.3897	11.1623	strong	1	0.772596	0.0475273
chr4	67988596	chr4:67988596:C:T	C	T	SNV	CTCF	jaspar2022	MA1930.1	MA1930.1	ataaataaataaataacacggaccagcagatggCagcacactgtaacacatttggtcaaactttattg	0.730566	0.702964	12.0857	11.6584	weak	1	-0.427214	-0.0262806
chr19	39440419	chr19:39440419:G:C	G	C	SNV	CTCF	jaspar2022	MA0139.1	MA0139.1	ttgcatatttgccaacttCcggcagatggcagtaaag	0.834724	0.871039	11.527	12.0171	weak	1	0.490023	0.0356194
chr6	134309674	chr6:134309674:C:T	C	T	SNV	ZKSCAN1	jaspar2022	MA1585.1	MA1585.1	cgagctgaaCtttcttgag	0.62315	0.510958	7.92205	6.5213	strong	1	-1.40075	-0.110932
chr15	33735792	chr15:33735792:G:A	G	A	SNV	CTCF	jaspar2022	MA1929.1	MA1929.1	gtagtgagaatttcatggcccagatcataaggcAgagggctttaaagttctcttcaaatcgcaccag	0.582185	0.626632	8.26237	8.83075	weak	1	0.568375	0.0417764
chr9	62802442	chr9:62802442:A:G	A	G	SNV	NEUROD1	jaspar2022	MA1109.1	MA1109.1	ggcctagacgccAgcagcggcgcct	0.713383	0.650506	7.93771	7.25091	weak	1	-0.686793	-0.06205
chr12	9751478	chr12:9751478:C:A	C	A	SNV	CTCF	jaspar2022	MA0139.1	MA0139.1	gtaatgatagaatattacCgctaggaggctgcttgtt	0.858799	0.721117	11.8519	9.99409	strong	1	-1.85782	-0.135043
chr9	40992231	chr9:40992231:A:G	A	G	SNV	ZKSCAN1	jaspar2022	MA1585.1	MA1585.1	tagctccccAgcagaaacc	0.617403	0.481604	7.8503	6.15481	strong	1	-1.69549	-0.134274
chr19	4414713	chr19:4414713:C:T	C	T	SNV	NFIC	jaspar2022	MA1527.1	MA1527.1	tgttttctcagttctgTtgtttctgtgcttggc	0.528709	0.55321	9.15077	9.56943	weak	1	0.418659	0.0243352
chr9	40992221	chr9:40992221:A:G	A	G	SNV	ZKSCAN1	jaspar2022	MA1585.1	MA1585.1	gcagccgccGtagctcccc	0.490148	0.644158	6.26147	8.18434	strong	1	1.92287	0.152281
chr11	95789959	chr11:95789959:C:G	C	G	SNV	SP1	jaspar2022	MA0079.5	MA0079.5	aacctgccCcgcccaaa	0.883901	0.786696	11.7145	10.4308	strong	1	-1.28367	-0.096898
chr18	24529055	chr18:24529055:G:A	G	A	SNV	NFIC	jaspar2022	MA0161.2	MA0161.2	ttggctttttGccaggcaaga	0.855337	0.733292	8.36156	7.19464	strong	1	-1.16692	-0.119748
chr11	72630333	chr11:72630333:G:A	G	A	SNV	CLOCK	jaspar2022	MA0819.2	MA0819.2	gcacagcacGgtgggcgac	0.637048	0.567203	6.22992	5.55332	weak	1	-0.676597	-0.0694237
chr9	26502535	chr9:26502535:C:T	C	T	SNV	CTCF	jaspar2022	MA0139.1	MA0139.1	cagaggggcacaactgttCcttccctgggaagcttcc	0.662246	0.591774	9.1997	8.24878	strong	1	-0.950917	-0.0691214
chrX	85003837	chrX:85003837:C:G	C	G	SNV	NFIC	jaspar2022	MA0161.2	MA0161.2	tggggctgtcCtaagggaagc	0.691169	0.566942	6.79189	5.60411	strong	1	-1.18778	-0.121889
chr15	24773224	chr15:24773224:C:G	C	G	SNV	CTCF	jaspar2022	MA0139.1	MA0139.1	gaagacggtggccggcagGagccgatccactgcgcgc	0.766631	0.80992	10.6082	11.1923	weak	1	0.584116	0.0424589
chr2	199955782	chr2:199955782:T:G	T	G	SNV	NR2F1	jaspar2022	MA1537.1	MA1537.1	ccggcaggcaccggGgtgaagggtcataa	0.751932	0.840632	13.9916	15.6352	strong	1	1.64354	0.0884185
chr7	67788883	chr7:67788883:G:C	G	C	SNV	CTCF	jaspar2022	MA0139.1	MA0139.1	gccctgctggctgcacagGggggcagtagcacaccac	0.768503	0.628264	10.6335	8.74117	strong	1	-1.89233	-0.137552
chr10	73997822	chr10:73997822:A:G	A	G	SNV	SP1	jaspar2022	MA0079.5	MA0079.5	ggggcgggGccagccgg	0.93173	1	12.3461	13.2477	strong	1	0.901556	0.0680539
chr11	73242795	chr11:73242795:T:C	T	C	SNV	CTCF	jaspar2022	MA1930.1	MA1930.1	ccccaggttggttggtgctgctctgcttcccccTggtggccaaagctggcagcagtggcaggaaacgg	0.729619	0.677141	12.071	11.2588	strong	1	-0.812222	-0.0499649
chr16	3444254	chr16:3444254:G:C	G	C	SNV	SP1	jaspar2022	MA0079.5	MA0079.5	ctggtgtaGgcatttgg	0.564178	0.460464	7.4923	6.12267	strong	1	-1.36963	-0.103386
chr10	4826253	chr10:4826253:G:T	G	T	SNV	ZNF143	jaspar2022	MA0088.2	MA0088.2	cgggtcgccagcgccGcagtagctcgcgcgg	0.506441	0.455775	9.90449	8.9193	strong	1	-0.985182	-0.0505179
chr1	200939477	chr1:200939477:A:C	A	C	SNV	NFIC	jaspar2022	MA1527.1	MA1527.1	ggtcttggctcactgcCaactgcatatcccagg	0.881977	0.997559	15.1872	17.1622	strong	1	1.97499	0.114799
chr16	78766577	chr16:78766577:G:C	G	C	SNV	CTCF	jaspar2022	MA1930.1	MA1930.1	tgctgttgcactccagcctgggcgacagagggaGagcttgtctccttgtctctaaaaaagaaaaacat	0.739797	0.71134	12.2285	11.7881	weak	1	-0.440443	-0.0270945
chr22	28918208	chr22:28918208:T:C	T	C	SNV	NR2F2	jaspar2022	MA1111.1	MA1111.1	ccagcggcccTtttagggtta	0.678496	0.556926	7.07579	5.83266	strong	1	-1.24313	-0.119954
chr8	4692936	chr8:4692936:A:G	A	G	SNV	NFIC	jaspar2022	MA0161.2	MA0161.2	tgcctcattgGcagtgggcca	0.714021	0.870141	7.01038	8.50311	strong	1	1.49273	0.153183
chr11	16843486	chr11:16843486:T:C	T	C	SNV	NFIC	jaspar2022	MA1527.1	MA1527.1	catatctgagtccatcTggctcagtgccaaggg	0.974116	0.858973	16.7616	14.7941	strong	1	-1.96749	-0.114363
chr9	63817506	chr9:63817506:C:T	C	T	SNV	NR3C1	jaspar2022	MA0113.3	MA0113.3	tgcgcagtagacagccTacctccctgtacctgg	0.623817	0.653454	10.7746	11.2807	weak	1	0.506111	0.0294274
chr3	42072566	chr3:42072566:C:T	C	T	SNV	PKNOX1	jaspar2022	MA0782.2	MA0782.2	gcttttttttttttCtttctctttttctt	0.610739	0.529108	6.72336	5.86641	strong	1	-0.856949	-0.0792757
chr2	96266108	chr2:96266108:T:C	T	C	SNV	BHLHE41	jaspar2022	MA0636.1	MA0636.1	gactggtagCtcgaggcgg	0.476013	0.6137	6.87571	8.85839	strong	1	1.98268	0.137485
chr12	131615814	chr12:131615814:G:A	G	A	SNV	NFIC	jaspar2022	MA1527.1	MA1527.1	cctcttcctttctcccActgtttccctgtcttg	0.515614	0.605314	8.927	10.4597	strong	1	1.53275	0.089093
chr16	2508957	chr16:2508957:T:G	T	G	SNV	NR2F1	jaspar2022	MA1537.1	MA1537.1	ggccgtgttggcctTcagggtgcaccctg	0.500899	0.451728	9.34015	8.42904	strong	1	-0.911106	-0.0490154
chr19	14221616	chr19:14221616:G:A	G	A	SNV	CTCF	jaspar2022	MA1930.1	MA1930.1	acaaccgctcagccccgcccggcctgacaccctAgcggtggcatgatgaagtggtgcttgccgggtgg	0.62423	0.656275	10.4398	10.9358	weak	1	0.495985	0.0305111
chr6	20550613	chr6:20550613:G:A	G	A	SNV	CTCF	jaspar2022	MA0139.1	MA0139.1	tgcttgctcgttgccaccAtgaggtgtcgctgttgtg	0.805702	0.86441	11.1354	11.9276	strong	1	0.792178	0.0575828
chr15	24773224	chr15:24773224:C:G	C	G	SNV	ASCL1	jaspar2022	MA1631.1	MA1631.1	ggtggccggcagGagccgatccact	0.76263	0.862283	8.28233	9.34255	strong	1	1.06022	0.0980978
chr1	59498849	chr1:59498849:C:T	C	T	SNV	NFIC	jaspar2022	MA0161.2	MA0161.2	atcattttggCtaaatgccaa	0.760549	0.62153	7.45526	6.12604	strong	1	-1.32922	-0.136404
chr8	101667940	chr8:101667940:C:T	C	T	SNV	RELB	jaspar2022	MA1117.1	MA1117.1	agctctgagtCggcaggctgg	0.561692	0.480767	5.14247	4.43624	strong	1	-0.706229	-0.0787538
chr16	26345116	chr16:26345116:A:G	A	G	SNV	ZNF24	jaspar2022	MA1124.1	MA1124.1	gtgagcaggcatGaatacgttggag	0.609608	0.708415	9.69388	11.2092	strong	1	1.51536	0.096636
chr14	105398532	chr14:105398532:G:T	G	T	SNV	MAZ	jaspar2022	MA1522.1	MA1522.1	ggtgggggcgGggcttgccgt	0.857234	0.722786	11.4848	9.69664	strong	1	-1.78821	-0.133611
chr1	143195112	chr1:143195112:T:C	T	C	SNV	ZBTB7B	jaspar2022	MA0694.1	MA0694.1	ggaataatccaCggactcgaatg	0.502213	0.603505	6.3189	7.56008	strong	1	1.24118	0.0999456
chr2	134782976	chr2:134782976:A:G	A	G	SNV	CTCF	jaspar2022	MA1929.1	MA1929.1	atgtgaacggtcctgtcaattttccactaggggGcaatatccattaataacagatccctgtcactca	0.609861	0.666457	8.61629	9.34001	strong	1	0.72372	0.0531945
chr11	64653029	chr11:64653029:T:A	T	A	SNV	ZNF24	jaspar2022	MA1124.1	MA1124.1	ctaccacgtgcaTgtgctcccccat	0.526657	0.419474	8.4217	6.77788	strong	1	-1.64381	-0.104827
chrX	153610153	chrX:153610153:C:T	C	T	SNV	CTCF	jaspar2022	MA1929.1	MA1929.1	ggcgaactaagctcgccacccccaccccatcccCctgctgctgggagccccaggcagtccccggcca	0.756924	0.700328	10.4968	9.77313	strong	1	-0.72372	-0.0531945
chr6	20550613	chr6:20550613:G:A	G	A	SNV	CTCF	jaspar2022	MA1930.1	MA1930.1	tctgggcagtcaatatgcttgctcgttgccaccAtgaggtgtcgctgttgtgaggtcctcttggggga	0.658738	0.691251	10.9739	11.4772	weak	1	0.503231	0.0309569
chr9	96156405	chr9:96156405:T:C	T	C	SNV	TBR1	jaspar2022	MA0802.1	MA0802.1	gggagaacaCatggtgaga	0.531866	0.697959	6.0306	7.86205	strong	1	1.83145	0.163631
chr1	245990688	chr1:245990688:A:G	A	G	SNV	CTCF	jaspar2022	MA1929.1	MA1929.1	atcaggagccaagaaataagagtggcctctagaGgctggaaaaggcaaggaagcagattctccctag	0.650914	0.761809	9.14125	10.5593	strong	1	1.41807	0.10423
chr19	53538188	chr19:53538188:C:T	C	T	SNV	CREM	jaspar2022	MA0609.2	MA0609.2	cggcggccctgtcccCgtaactgtgacacgg	0.485794	0.429556	5.00726	4.4679	weak	1	-0.539354	-0.0542675
chr8	20436846	chr8:20436846:T:G	T	G	SNV	CTCF	jaspar2022	MA0139.1	MA0139.1	tgtgagatgtgatcacaaGcttgaaataacacagaca	0.504702	0.644475	7.07387	8.95991	strong	1	1.88604	0.137095
chr14	24232410	chr14:24232410:A:C	A	C	SNV	NR2F1	jaspar2022	MA1537.1	MA1537.1	ccccccccccccccCctgggttccggaaa	0.445894	0.486603	8.32094	9.07525	strong	1	0.754312	0.0405803
chr12	77213443	chr12:77213443:T:C	T	C	SNV	TBR1	jaspar2022	MA0802.1	MA0802.1	tttttttctTgactctaat	0.654791	0.617032	7.38606	6.9697	weak	1	-0.416357	-0.0371994
chr19	5031418	chr19:5031418:G:C	G	C	SNV	NR2F1	jaspar2022	MA1538.1	MA1538.1	acggtgcacttgggCcctcctgtgcagac	0.392575	0.504505	6.50193	8.31006	strong	1	1.80812	0.11083
chr7	351877	chr7:351877:C:T	C	T	SNV	CTCF	jaspar2022	MA0139.1	MA0139.1	cgtgaaagcaatgcccccTgctgctcacacccattac	0.771623	0.874297	10.6756	12.061	strong	1	1.38544	0.100706
chr4	154119536	chr4:154119536:G:C	G	C	SNV	CTCF	jaspar2022	MA0139.1	MA0139.1	gtgagtgctccacccagaGgaaagagacatgcacagc	0.751994	0.613082	10.4107	8.53631	strong	1	-1.87442	-0.13625
chr9	67724120	chr9:67724120:A:G	A	G	SNV	NR2F1	jaspar2022	MA1538.1	MA1538.1	ctcctggcatccggGgacgttcccttcga	0.504481	0.564324	8.30967	9.27639	strong	1	0.966716	0.0592555
chr2	54285781	chr2:54285781:A:C	A	C	SNV	SOX8	jaspar2022	MA0868.2	MA0868.2	aacatatatAatcttcctc	0.732204	0.546997	6.6494	5.00728	strong	1	-1.64211	-0.181977
chr9	93596999	chr9:93596999:C:T	C	T	SNV	NFIC	jaspar2022	MA1527.1	MA1527.1	tgcagtggcacgatctTggctcactgccagctc	0.881518	0.996661	15.1793	17.1468	strong	1	1.96749	0.114363
chr8	18855003	chr8:18855003:T:C	T	C	SNV	SOX8	jaspar2022	MA0868.2	MA0868.2	cagcaggagTtgagatcca	0.587411	0.432671	5.3656	3.99362	strong	1	-1.37198	-0.152041
chr12	54560522	chr12:54560522:C:T	C	T	SNV	SP1	jaspar2022	MA0079.5	MA0079.5	gccccgccCaactcctc	0.883901	0.736338	11.7145	9.76581	strong	1	-1.94869	-0.147097
chr12	132904952	chr12:132904952:G:A	G	A	SNV	SP1	jaspar2022	MA0079.5	MA0079.5	gccaccagGggcagcgc	0.819897	0.672334	10.8693	8.92059	strong	1	-1.94869	-0.147097
chr9	63817564	chr9:63817564:T:G	T	G	SNV	PKNOX1	jaspar2022	MA0782.2	MA0782.2	aggaatgctttcttGtcattgttgacagc	0.622118	0.765594	6.84281	8.349	strong	1	1.50619	0.139336
chr19	18282063	chr19:18282063:C:A	C	A	SNV	ATF7	jaspar2022	MA0834.1	MA0834.1	gggtcccgcatggCtaaataactcctt	0.570858	0.451942	9.28481	7.36246	strong	1	-1.92235	-0.118501
chr5	3311175	chr5:3311175:T:C	T	C	SNV	SP1	jaspar2022	MA0079.5	MA0079.5	gccctgcgCgcctgcgt	0.585957	0.733521	7.77992	9.7286	strong	1	1.94869	0.147097
chrX	149512531	chrX:149512531:T:C	T	C	SNV	CTCF	jaspar2022	MA0139.1	MA0139.1	gcctggccagagactagcTtgtggagttccagatcct	0.66924	0.566566	9.29408	7.90864	strong	1	-1.38544	-0.100706
chr3	126925581	chr3:126925581:C:A	C	A	SNV	SP1	jaspar2022	MA0079.5	MA0079.5	ccatgagcCgcagaagg	0.585957	0.546071	7.77992	7.25318	weak	1	-0.526731	-0.0397602
chr12	630843	chr12:630843:C:G	C	G	SNV	BHLHE41	jaspar2022	MA0636.1	MA0636.1	gcaggcttcGggccctgcg	0.452944	0.487772	6.54352	7.04504	weak	1	0.50152	0.0347769
chr12	9751478	chr12:9751478:C:A	C	A	SNV	CTCF	jaspar2022	MA1930.1	MA1930.1	gggagtagattgttggtaatgatagaatattacCgctaggaggctgcttgtttcttttttcccacagc	0.802984	0.690885	13.2065	11.4715	strong	1	-1.73503	-0.106732
chr16	84924948	chr16:84924948:G:T	G	T	SNV	NR2F2	jaspar2022	MA1111.1	MA1111.1	cccctcgaggTggaggagcct	0.563775	0.643027	5.90269	6.71309	strong	1	0.810405	0.0781991
chr19	3976865	chr19:3976865:C:T	C	T	SNV	NFIC	jaspar2022	MA1527.1	MA1527.1	ctgcagaccagacactTggcctggtgcccagca	0.766487	0.88163	13.2138	15.1812	strong	1	1.96749	0.114363
chr12	131622172	chr12:131622172:T:C	T	C	SNV	TCF12	jaspar2022	MA1648.1	MA1648.1	ctacacaaggTggccttgttt	0.715239	0.608375	6.17519	5.27994	strong	1	-0.895245	-0.104575
chr13	98464130	chr13:98464130:T:C	T	C	SNV	NR2F1	jaspar2022	MA0017.2	MA0017.2	agagagcttaaaTgatctggtcggg	0.735626	0.650109	8.91262	7.8964	strong	1	-1.01622	-0.0843037
chr1	204412110	chr1:204412110:G:T	G	T	SNV	SP1	jaspar2022	MA0079.5	MA0079.5	tctgtgtgGtctcctag	0.555683	0.48321	7.38011	6.42305	strong	1	-0.957061	-0.0722437
chr14	63212991	chr14:63212991:C:A	C	A	SNV	NFIC	jaspar2022	MA1527.1	MA1527.1	ttttgtcaccatctgcCacctaacagctaagcc	0.712764	0.597182	12.2958	10.3208	strong	1	-1.97499	-0.114799
chr1	15835035	chr1:15835035:C:G	C	G	SNV	BHLHE41	jaspar2022	MA0636.1	MA0636.1	ctgctaaatCccgtgactc	0.854545	0.716908	12.3265	10.3446	strong	1	-1.98197	-0.137435
chr11	61132794	chr11:61132794:C:T	C	T	SNV	NFIC	jaspar2022	MA1527.1	MA1527.1	gcaccttggcatcatgCcaggcccacagtggcc	0.997375	0.884384	17.159	15.2283	strong	1	-1.93071	-0.112226
chr16	76059404	chr16:76059404:T:C	T	C	SNV	MEF2A	jaspar2022	MA0052.4	MA0052.4	ttgttcagtgtatcTatgctgtagacact	0.671096	0.547306	7.13468	5.87471	strong	1	-1.25996	-0.120199
chr16	2842769	chr16:2842769:G:A	G	A	SNV	NFIC	jaspar2022	MA0161.2	MA0161.2	agtttccggcAgacttcctgt	0.474869	0.584832	4.72376	5.77516	strong	1	1.0514	0.107894
chr1	32336573	chr1:32336573:C:T	C	T	SNV	SRF	jaspar2022	MA0083.3	MA0083.3	aacgccttggtcctgTagccgctggcagtct	0.383438	0.464058	7.4572	8.98431	strong	1	1.52711	0.0798023
chr5	20833519	chr5:20833519:C:T	C	T	SNV	CTCF	jaspar2022	MA0139.1	MA0139.1	gcaagtcatgcatccttaTagttgatatttctatcct	0.561026	0.619734	7.83389	8.62607	strong	1	0.792178	0.0575828
chr11	126890756	chr11:126890756:A:G	A	G	SNV	EGR1	jaspar2022	MA0162.4	MA0162.4	gacgactgcaaacGtgagcgtccccca	0.621623	0.788046	6.49547	8.15202	strong	1	1.65655	0.161429
chr8	33424817	chr8:33424817:G:A	G	A	SNV	CTCF	jaspar2022	MA0139.1	MA0139.1	ccctcttgtcgccaaatgGaacaggccactgctcttg	0.710042	0.631137	9.84464	8.77993	strong	1	-1.06471	-0.0773926
chr2	86221285	chr2:86221285:A:G	A	G	SNV	CTCF	jaspar2022	MA1930.1	MA1930.1	taccactgctgtgctccccaacagccagcaggaGgcagcacaacatgcaaagctgaattttaggctgg	0.826316	0.929032	13.5676	15.1574	strong	1	1.5898	0.0977989
chr2	11584349	chr2:11584349:A:G	A	G	SNV	EGR1	jaspar2022	MA0162.4	MA0162.4	ctcattggagtggGtgcgctgctctgt	0.741909	0.902885	7.69278	9.29512	strong	1	1.60234	0.156147
chr19	43984200	chr19:43984200:G:A	G	A	SNV	RELB	jaspar2022	MA1117.1	MA1117.1	cgacacttccAgtctccgagc	0.60123	0.712973	5.48752	6.46269	strong	1	0.975172	0.108744
chr12	57105	chr12:57105:C:T	C	T	SNV	NR2F1	jaspar2022	MA0017.2	MA0017.2	acctgttgctgcTggctttccccca	0.593888	0.638347	7.2283	7.75663	weak	1	0.528324	0.0438288
chr16	75403089	chr16:75403089:A:G	A	G	SNV	CTCF	jaspar2022	MA1930.1	MA1930.1	tgctgccctcttctgacaaattgagaaaacagcAgacgccctgaatacccatcaaggacatttaaaat	0.881315	0.831398	14.4189	13.6463	strong	1	-0.772596	-0.0475273
chr6	168895209	chr6:168895209:G:A	G	A	SNV	CTCF	jaspar2022	MA1930.1	MA1930.1	tcctggcacagtgtccaggcttggccacgagggGgcacttgaaacctgcctttcggtgcctggtcgtc	0.819147	0.71643	13.4567	11.8669	strong	1	-1.5898	-0.0977989
chr14	69891625	chr14:69891625:G:C	G	C	SNV	CTCF	jaspar2022	MA0139.1	MA0139.1	ccaggaggggctgctgctGccttctcccggcctgtgc	0.847596	0.784145	11.7007	10.8446	strong	1	-0.856183	-0.0622352
chr1	121750216	chr1:121750216:G:A	G	A	SNV	REST	jaspar2022	MA0138.2	MA0138.2	tcagccgctttgaggtcaacAgtagaataggaaatatcttc	0.482653	0.51222	10.0485	10.6375	weak	1	0.589006	0.0289374
chr2	90390509	chr2:90390509:T:C	T	C	SNV	SP1	jaspar2022	MA0079.5	MA0079.5	gaatggaaCagaatgga	0.430128	0.46733	5.72206	6.21334	weak	1	0.491284	0.0370846
chr3	42072566	chr3:42072566:C:T	C	T	SNV	SP1	jaspar2022	MA0079.5	MA0079.5	ttttttttCtttctctt	0.427443	0.345915	5.68661	4.60996	strong	1	-1.07665	-0.0812708
chr15	24878325	chr15:24878325:T:C	T	C	SNV	RELB	jaspar2022	MA1117.1	MA1117.1	gcaagaaatgCgccaccgttc	0.579414	0.667641	5.29713	6.06708	strong	1	0.769955	0.08586
chr19	53538188	chr19:53538188:C:T	C	T	SNV	PKNOX1	jaspar2022	MA0782.2	MA0782.2	ggcggccctgtcccTgtaactgtgacacg	0.605097	0.706893	6.66413	7.73276	strong	1	1.06864	0.0988586
chr11	1458537	chr11:1458537:G:T	G	T	SNV	CTCF	jaspar2022	MA1930.1	MA1930.1	aaggatgtgtggaaggtggctagccagcaggggGcctcctcagacactgcccacccccccagagactg	0.81028	0.759995	13.3195	12.5412	strong	1	-0.778301	-0.0478782
chr11	65266403	chr11:65266403:T:C	T	C	SNV	CTCF	jaspar2022	MA1929.1	MA1929.1	cctgattctgcccttatcctcttttgtctccccCcagtggtgagctttgtaaggacaaggatgcttc	0.678906	0.793812	9.4992	10.9685	strong	1	1.46935	0.108
chr17	6097328	chr17:6097328:A:G	A	G	SNV	CTCF	jaspar2022	MA0139.1	MA0139.1	agcataatgaagacgccaGagggcatagcagggaagc	0.658275	0.797738	9.14612	11.028	strong	1	1.88185	0.13679
chr2	44153826	chr2:44153826:G:A	G	A	SNV	NFIC	jaspar2022	MA1527.1	MA1527.1	gagctggcagtgagccAagattgcgccactgca	0.881518	0.996661	15.1793	17.1468	strong	1	1.96749	0.114363
chr4	139295856	chr4:139295856:G:C	G	C	SNV	CTCF	jaspar2022	MA1930.1	MA1930.1	ccgagttggcaacagaaccagcgccacctggcgGccggaagtgcgggactcgagggctctgcagcaga	0.755178	0.708065	12.4666	11.7374	strong	1	-0.729204	-0.0448579
chr19	55385959	chr19:55385959:A:G	A	G	SNV	GATA4	jaspar2022	MA0482.2	MA0482.2	tcgccgctgcgAagggaggtgag	0.611506	0.508794	6.14668	5.151	strong	1	-0.995687	-0.100445
chr9	63817506	chr9:63817506:C:T	C	T	SNV	FOXK2	jaspar2022	MA1103.2	MA1103.2	gtagacagccTacctccctgt	0.372241	0.552053	3.45928	5.02975	strong	1	1.57047	0.175627
chr5	56909530	chr5:56909530:A:G	A	G	SNV	SP1	jaspar2022	MA0079.5	MA0079.5	acactgagGgcggagcc	0.708713	0.856276	9.401	11.3497	strong	1	1.94869	0.147097
chr14	106436444	chr14:106436444:A:G	A	G	SNV	CTCF	jaspar2022	MA0139.1	MA0139.1	gcttgggaggcctgggcgGgagtcattcaggtcgtgg	0.519913	0.58006	7.27913	8.09072	strong	1	0.811598	0.0589944
chr10	122112808	chr10:122112808:A:G	A	G	SNV	CTCF	jaspar2022	MA1930.1	MA1930.1	cgcctccaggagcagcggccgggctgtgcgtccAtcggtccgtgcgtctctcgcctgccgctctgcgg	0.594613	0.56356	9.98144	9.50082	weak	1	-0.48062	-0.0295659
chr2	20492341	chr2:20492341:G:T	G	T	SNV	SP1	jaspar2022	MA0079.5	MA0079.5	tccacttgGgtaatggg	0.557908	0.410345	7.40951	5.46082	strong	1	-1.94869	-0.147097
chr9	63817332	chr9:63817332:T:C	T	C	SNV	SOX8	jaspar2022	MA0868.2	MA0868.2	cggaggagtTgagccacag	0.595044	0.456854	5.43328	4.20804	strong	1	-1.22524	-0.135779
chr5	57037606	chr5:57037606:C:T	C	T	SNV	SP1	jaspar2022	MA0079.5	MA0079.5	tggaactgCcactgctt	0.586971	0.439407	7.7933	5.84461	strong	1	-1.94869	-0.147097
chr9	34988608	chr9:34988608:G:C	G	C	SNV	ZNF24	jaspar2022	MA1124.1	MA1124.1	gctccctgcatcCgggacactgggg	0.525779	0.566061	8.40823	9.02602	weak	1	0.617799	0.0393976
chr21	32949943	chr21:32949943:G:C	G	C	SNV	EGR1	jaspar2022	MA0162.4	MA0162.4	gccagcttgtcacGtgggactggtgac	0.724114	0.560307	7.51565	5.88514	strong	1	-1.63051	-0.158892
chr3	127697630	chr3:127697630:C:T	C	T	SNV	SP1	jaspar2022	MA0079.5	MA0079.5	cacatgacCacgttctg	0.501592	0.454071	6.6658	6.03825	weak	1	-0.627553	-0.0473708
chr15	24773224	chr15:24773224:C:G	C	G	SNV	EGR1	jaspar2022	MA0162.4	MA0162.4	cggtggccggcagGagccgatccactg	0.528424	0.61071	5.56777	6.38684	strong	1	0.81907	0.0798174
chrX	131741908	chrX:131741908:C:A	C	A	SNV	SP1	jaspar2022	MA0079.5	MA0079.5	gtatgggaCgaagcact	0.723647	0.683761	9.59822	9.07149	weak	1	-0.526731	-0.0397602
chr4	7313478	chr4:7313478:C:G	C	G	SNV	NEUROD1	jaspar2022	MA1109.1	MA1109.1	aggaggagcggaGatgctggggtgg	0.587215	0.725042	6.5596	8.06505	strong	1	1.50546	0.136014
chr1	17874368	chr1:17874368:G:A	G	A	SNV	NEUROD1	jaspar2022	MA1109.1	MA1109.1	caacagaagccaGatggtcatcttt	0.982438	0.844094	10.8766	9.36544	strong	1	-1.51112	-0.136525
chr9	21335409	chr9:21335409:G:C	G	C	SNV	NR2F2	jaspar2022	MA1111.1	MA1111.1	gataccacggGgtgggagcgg	0.499327	0.440224	5.24367	4.63931	weak	1	-0.604361	-0.0583171
chr9	40992231	chr9:40992231:A:G	A	G	SNV	NFIC	jaspar2022	MA1527.1	MA1527.1	gccgccatagctccccGgcagaaacccggaagt	0.595029	0.701893	10.284	12.11	strong	1	1.82601	0.10614
chr1	16913903	chr1:16913903:T:G	T	G	SNV	SP1	jaspar2022	MA0079.5	MA0079.5	gcctggctGgccgggcg	0.544916	0.651886	7.23793	8.65055	strong	1	1.41262	0.106631
chr5	125485371	chr5:125485371:G:A	G	A	SNV	MEF2A	jaspar2022	MA0052.4	MA0052.4	gaacaaagagtgctAttagttgagtagtc	0.591481	0.716644	6.32433	7.59827	strong	1	1.27394	0.121532
chr10	112721263	chr10:112721263:A:G	A	G	SNV	NEUROD1	jaspar2022	MA1109.1	MA1109.1	ggtcactgaaacAaataaccgatag	0.606796	0.450914	6.77348	5.0708	strong	1	-1.70268	-0.153833
chr5	154541900	chr5:154541900:G:A	G	A	SNV	CTCF	jaspar2022	MA1929.1	MA1929.1	gtcagcggggggcgctgtgcagggcctgaggtgGgtaggaacctgaggggctgcatatgcaccatat	0.652698	0.596101	9.16406	8.44034	strong	1	-0.72372	-0.0531945
chr1	204412110	chr1:204412110:G:T	G	T	SNV	SOX8	jaspar2022	MA0868.2	MA0868.2	ttctgtgtgTtctcctagg	0.637617	0.686182	5.81074	6.24135	weak	1	0.430602	0.0477187
chr15	63916681	chr15:63916681:C:T	C	T	SNV	CTCF	jaspar2022	MA1930.1	MA1930.1	acagctgcagaaaggctgtgagcctgaaggctgTcccctacagtgaacaagccagtggaaggaggcag	0.657514	0.707431	10.955	11.7276	strong	1	0.772596	0.0475273
chr11	64653029	chr11:64653029:T:A	T	A	SNV	CTCF	jaspar2022	MA1930.1	MA1930.1	acacagtctctctgcctgggcctaccacgtgcaAgtgctcccccatgtgaccccaagccacaccatgc	0.600652	0.638569	10.0749	10.6618	weak	1	0.586855	0.0361012
chr19	43984200	chr19:43984200:G:A	G	A	SNV	ZNF143	jaspar2022	MA0088.2	MA0088.2	atcatcgacacttccAgtctccgagcaggac	0.507783	0.5397	9.93059	10.5512	weak	1	0.620613	0.0318236
chr9	22813718	chr9:22813718:C:T	C	T	SNV	CTCF	jaspar2022	MA0139.1	MA0139.1	taaacttcaagacttccaCatggtggcagtaagtagc	0.844957	0.814119	11.6651	11.249	weak	1	-0.416114	-0.030247
chr19	6460648	chr19:6460648:A:T	A	T	SNV	CTCF	jaspar2022	MA1930.1	MA1930.1	ctgctagtttcgggcgcagtttctcgatccaccTttagggggaagggagcccagaccacttgacagcg	0.626817	0.686523	10.4799	11.404	strong	1	0.924094	0.0568468
chr16	23510459	chr16:23510459:C:T	C	T	SNV	CTCF	jaspar2022	MA0139.1	MA0139.1	cgccactgcctcttcagcTgctgtagcgtcctggcgc	0.652253	0.685718	9.06486	9.51643	weak	1	0.451575	0.0328246
chr17	82205012	chr17:82205012:C:A	C	A	SNV	NFIC	jaspar2022	MA1527.1	MA1527.1	tcacgttggcacaacgCcatcaccccagtgtcg	0.967807	0.852061	16.6538	14.676	strong	1	-1.97779	-0.114962
chr11	47412337	chr11:47412337:C:A	C	A	SNV	TCF12	jaspar2022	MA1648.1	MA1648.1	gcattgccgcCccctgcaggt	0.884724	0.714238	7.59504	6.1668	strong	1	-1.42824	-0.166836
chr11	116276772	chr11:116276772:T:A	T	A	SNV	CTCF	jaspar2022	MA0139.1	MA0139.1	tagagcaagcctgccaccTggtggtgaggccacccaa	0.956071	0.899981	13.1644	12.4076	strong	1	-0.756853	-0.055015
chr19	2273837	chr19:2273837:C:T	C	T	SNV	NR2F2	jaspar2022	MA1111.1	MA1111.1	ggggtcgtggCctggagcgct	0.749543	0.615932	7.80229	6.43603	strong	1	-1.36625	-0.131835
chr2	94208351	chr2:94208351:G:A	G	A	SNV	NFIC	jaspar2022	MA1527.1	MA1527.1	gggcctgcgcctctccAcgccagcgcctgcgct	0.583502	0.606978	10.087	10.4882	weak	1	0.401149	0.0233173
chr12	122119686	chr12:122119686:T:C	T	C	SNV	NFIC	jaspar2022	MA0161.2	MA0161.2	ccaccgcgccTggcgatatgc	0.745068	0.603913	7.30724	5.9576	strong	1	-1.34964	-0.138499
chr2	197453301	chr2:197453301:A:C	A	C	SNV	SP1	jaspar2022	MA0079.5	MA0079.5	cgcacgggCaaagcgat	0.561748	0.601634	7.46021	7.98694	weak	1	0.526731	0.0397602
chr10	30752051	chr10:30752051:A:G	A	G	SNV	CTCF	jaspar2022	MA1929.1	MA1929.1	ctgcatgccatagagacaggccaccagcagaggGggccgcaggctcggacagagagctggggctgtg	0.646229	0.702825	9.08133	9.80505	strong	1	0.72372	0.0531945
chr14	104896820	chr14:104896820:A:G	A	G	SNV	CTCF	jaspar2022	MA1930.1	MA1930.1	cttggtgtttggggtgggtggggccctgcacatGggacagaccaggggtggctgcaattcagagatgc	0.566661	0.679847	9.54881	11.3007	strong	1	1.75184	0.107767
chr19	12870439	chr19:12870439:C:G	C	G	SNV	SRF	jaspar2022	MA0083.3	MA0083.3	gagcttgcagtgagcCgacatcgcgccactg	0.549463	0.513284	10.6021	9.91675	weak	1	-0.685314	-0.0358125
chr3	48960696	chr3:48960696:A:C	A	C	SNV	NR2F1	jaspar2022	MA1537.1	MA1537.1	tgagcctgggagacAgaggttgcagtgag	0.6708	0.572089	12.4883	10.6593	strong	1	-1.82904	-0.0983981
chr2	85561615	chr2:85561615:C:A	C	A	SNV	SP1	jaspar2022	MA0079.5	MA0079.5	gcagggggCggaacaag	0.91002	0.870133	12.0594	11.5327	weak	1	-0.526731	-0.0397602
chr18	12375614	chr18:12375614:T:C	T	C	SNV	NFIC	jaspar2022	MA0161.2	MA0161.2	ggcccgctctTggctcactgc	0.890637	0.749482	8.69908	7.34944	strong	1	-1.34964	-0.138499
chr5	138461691	chr5:138461691:A:G	A	G	SNV	SRF	jaspar2022	MA0083.3	MA0083.3	caaccacatggattaAggtggctccccaaag	0.513752	0.491308	9.92562	9.50048	weak	1	-0.42514	-0.0222166
chr11	116217207	chr11:116217207:G:A	G	A	SNV	CTCF	jaspar2022	MA0139.1	MA0139.1	tctccacgctcaccagacGgcgctgtgcagtgttccc	0.857872	0.727933	11.8394	10.0861	strong	1	-1.75334	-0.127449
chr5	10134053	chr5:10134053:C:T	C	T	SNV	CTCF	jaspar2022	MA0139.1	MA0139.1	atagctatgtagtgacatCtcatggtcatttggtttt	0.84825	0.708787	11.7096	9.8277	strong	1	-1.88185	-0.13679
chrX	49191162	chrX:49191162:C:T	C	T	SNV	SP4	jaspar2022	MA0685.2	MA0685.2	tctcccccCgcctttcc	0.877452	0.784101	11.4561	10.2392	strong	1	-1.21693	-0.0932251
chr11	72630333	chr11:72630333:G:A	G	A	SNV	OLIG2	jaspar2022	MA0678.1	MA0678.1	gcacagcacAgtgggcgac	0.488368	0.52554	5.62252	6.04499	weak	1	0.422466	0.0369371
chr12	112418839	chr12:112418839:G:A	G	A	SNV	MEIS2	jaspar2022	MA0774.1	MA0774.1	cgctgacAggaagca	0.793267	0.982178	8.0933	9.9927	strong	1	1.8994	0.18673
chr11	47412337	chr11:47412337:C:A	C	A	SNV	NR2F2	jaspar2022	MA1111.1	MA1111.1	gcattgccgcAccctgcaggt	0.483224	0.571294	5.07901	5.97957	strong	1	0.900569	0.0868993
chr20	61414583	chr20:61414583:A:G	A	G	SNV	NR3C1	jaspar2022	MA0113.3	MA0113.3	ctgtgcggcaatattaGtaatgctcactattgt	0.475951	0.527714	8.2495	9.13344	strong	1	0.883946	0.0513963
chr1	107670227	chr1:107670227:T:G	T	G	SNV	NFIC	jaspar2022	MA0161.2	MA0161.2	gctggctcttGgccagctatt	0.726237	0.888587	7.12719	8.67948	strong	1	1.55229	0.159295
chr7	33062850	chr7:33062850:C:T	C	T	SNV	SP4	jaspar2022	MA0685.2	MA0685.2	gcgcagctCcgccccca	0.975613	0.864528	12.7358	11.2877	strong	1	-1.44813	-0.110936
chr6	134882641	chr6:134882641:T:C	T	C	SNV	CTCF	jaspar2022	MA0139.1	MA0139.1	cagagaagcagcgtcaccTgctgggatgcagtggtgt	0.882101	0.779427	12.1663	10.7809	strong	1	-1.38544	-0.100706
chr9	63817506	chr9:63817506:C:T	C	T	SNV	CLOCK	jaspar2022	MA0819.2	MA0819.2	tagacagccCacctccctg	0.677564	0.497544	6.62241	4.87852	strong	1	-1.74389	-0.178936
chr17	76593599	chr17:76593599:A:G	A	G	SNV	CTCF	jaspar2022	MA1929.1	MA1929.1	ccctcaacccgtgatctgatgctgtctccaggcGgatggtctcagaagtgaactgaattagaggaca	0.652129	0.713174	9.15678	9.93739	strong	1	0.780605	0.0573757
chr4	184449029	chr4:184449029:C:T	C	T	SNV	SP1	jaspar2022	MA0079.5	MA0079.5	acacagcaCtgtccaag	0.555324	0.448245	7.37538	5.96132	strong	1	-1.41406	-0.10674
chr3	10992142	chr3:10992142:A:C	A	C	SNV	CTCF	jaspar2022	MA0139.1	MA0139.1	ggggcacgggcccaccccCacccacagcgacccacag	0.59716	0.639029	8.32147	8.88643	weak	1	0.564962	0.0410666
chr10	69644081	chr10:69644081:C:T	C	T	SNV	NFIC	jaspar2022	MA0161.2	MA0161.2	cagtgctcctTctcctctagc	0.446701	0.567698	4.45444	5.61133	strong	1	1.15689	0.11872
chrX	131747410	chrX:131747410:A:G	A	G	SNV	ZNF384	jaspar2022	MA1125.1	MA1125.1	aaatcacaaccAaacgtggatgc	0.667607	0.511452	8.33901	6.42547	strong	1	-1.91354	-0.154166
chr12	13135912	chr12:13135912:G:C	G	C	SNV	CTCF	jaspar2022	MA0139.1	MA0139.1	tccgggcacccacgcctcCctgcggactggctgagga	0.618041	0.757515	8.60322	10.4852	strong	1	1.882	0.136801
chr19	17794810	chr19:17794810:A:G	A	G	SNV	NFIC	jaspar2022	MA0161.2	MA0161.2	gctctgtgccAggaacccgca	0.85605	0.714895	8.36837	7.01874	strong	1	-1.34964	-0.138499
chr3	10473569	chr3:10473569:G:T	G	T	SNV	NFIC	jaspar2022	MA1527.1	MA1527.1	acccaggaggcaagttGgcagtgagccaagatt	0.997559	0.881977	17.1622	15.1872	strong	1	-1.97499	-0.114799
chr6	29702735	chr6:29702735:G:T	G	T	SNV	CTCF	jaspar2022	MA1930.1	MA1930.1	cgctgcgctgctctcggattctgagtgctctccTggacggggctgcgggctgaatgggcagacggggc	0.613765	0.646179	10.2779	10.7796	weak	1	0.501688	0.030862
chr16	3443495	chr16:3443495:G:A	G	A	SNV	SP4	jaspar2022	MA0685.2	MA0685.2	ggagctgcGggaaaagc	0.657708	0.508221	8.59154	6.6428	strong	1	-1.94873	-0.149286
chr18	74148347	chr18:74148347:G:C	G	C	SNV	SP4	jaspar2022	MA0685.2	MA0685.2	agggacgcGcagcgtct	0.740784	0.680198	9.67452	8.88472	strong	1	-0.789797	-0.0605037
chr3	71973490	chr3:71973490:A:G	A	G	SNV	CTCF	jaspar2022	MA1930.1	MA1930.1	ctgggccattcactccgggagcagccagctgtcGctgtcgtgtcatgaggacagtcaagcagccctaa	0.656732	0.733065	10.9429	12.1244	strong	1	1.18145	0.0726788
chr17	64919496	chr17:64919496:A:T	A	T	SNV	REST	jaspar2022	MA0138.2	MA0138.2	cgcggtcacgtgagctgagcTgcctacgagcctgggacggg	0.521679	0.612461	10.8259	12.6344	strong	1	1.80846	0.088848
chr15	91104210	chr15:91104210:T:G	T	G	SNV	SOX8	jaspar2022	MA0868.2	MA0868.2	agttctgagTtgtgcttgc	0.794279	0.613961	7.19978	5.60101	strong	1	-1.59877	-0.177173
chr12	24565391	chr12:24565391:A:G	A	G	SNV	NFIC	jaspar2022	MA1527.1	MA1527.1	agtcttctggcacctgGccagtaggttacgaac	0.875459	0.97222	15.0758	16.7292	strong	1	1.65339	0.0961059
chr17	6655010	chr17:6655010:G:A	G	A	SNV	CTCF	jaspar2022	MA1929.1	MA1929.1	gaggagttccggaaaccacggctccctcttgcgGtcccggggcaccgaggaatatggggacggtggc	0.717135	0.6746	9.98804	9.44413	weak	1	-0.543906	-0.0399779
chr19	1021638	chr19:1021638:T:C	T	C	SNV	SP1	jaspar2022	MA0079.5	MA0079.5	ctgtagtcCacagctcg	0.513332	0.54941	6.82084	7.29727	weak	1	0.476436	0.0359637
chr8	21325332	chr8:21325332:A:G	A	G	SNV	NFIC	jaspar2022	MA1527.1	MA1527.1	actataagacaacttgGcacactgccagtgttc	0.881072	0.996818	15.1717	17.1495	strong	1	1.97779	0.114962
chr15	24773053	chr15:24773053:G:A	G	A	SNV	SP4	jaspar2022	MA0685.2	MA0685.2	gtatacgtGgcggggcc	0.850513	0.701026	11.105	9.15623	strong	1	-1.94873	-0.149286
chr10	46546893	chr10:46546893:C:T	C	T	SNV	MEF2A	jaspar2022	MA0052.4	MA0052.4	actcatctcagtgaTgatgaggtgagtgg	0.449474	0.492418	4.87895	5.31605	weak	1	0.437098	0.0416985
chr19	50329176	chr19:50329176:C:T	C	T	SNV	CTCF	jaspar2022	MA1930.1	MA1930.1	cgacgggattgggtgggaggaggagcgaggtagCgggggcgtggcttaggggagaggaaccaaactga	0.554101	0.526499	9.35441	8.9272	weak	1	-0.427214	-0.0262806
chr3	134472461	chr3:134472461:C:A	C	A	SNV	NFIC	jaspar2022	MA0161.2	MA0161.2	tggctaagagCcagatgaaat	0.617006	0.461858	6.08278	4.59936	strong	1	-1.48343	-0.152229
chr2	127514892	chr2:127514892:A:G	A	G	SNV	CLOCK	jaspar2022	MA0819.2	MA0819.2	agtccaggcGaatccaagt	0.561917	0.672781	5.50212	6.57607	strong	1	1.07395	0.110195
chr11	300134	chr11:300134:A:G	A	G	SNV	CTCF	jaspar2022	MA1930.1	MA1930.1	cagggggtgcagcctgttaggagccggcaggggGacccccagggaccagcaacagctgttaacactgg	0.66472	0.717185	11.0665	11.8786	strong	1	0.812034	0.0499533
chr8	134415433	chr8:134415433:A:G	A	G	SNV	NEUROD1	jaspar2022	MA1109.1	MA1109.1	gctgagctcacaGgttgagggaaag	0.614549	0.726898	6.85816	8.08533	strong	1	1.22717	0.110872
chr17	76570192	chr17:76570192:A:G	A	G	SNV	SOX8	jaspar2022	MA0868.2	MA0868.2	cagtgggacAgcggaccca	0.639632	0.424341	5.82861	3.91976	strong	1	-1.90886	-0.211536
chr17	19508169	chr17:19508169:C:T	C	T	SNV	ZNF143	jaspar2022	MA0088.2	MA0088.2	agcgatgcggagtcaCcactttggtgtgacc	0.577201	0.523007	11.2804	10.2266	strong	1	-1.0538	-0.0540363
chr11	1458537	chr11:1458537:G:T	G	T	SNV	CTCF	jaspar2022	MA0139.1	MA0139.1	gtggctagccagcaggggGcctcctcagacactgccc	0.92964	0.860638	12.8078	11.8767	strong	1	-0.931078	-0.0676793
chrX	153610153	chrX:153610153:C:T	C	T	SNV	SP1	jaspar2022	MA0079.5	MA0079.5	cccatcccCctgctgct	0.81255	0.690537	10.7723	9.16097	strong	1	-1.61128	-0.121627
chr2	101151633	chr2:101151633:C:T	C	T	SNV	SP1	jaspar2022	MA0079.5	MA0079.5	gctccctcCctcccgcc	0.769831	0.705472	10.2081	9.3582	strong	1	-0.849911	-0.0641555
chrX	41923740	chrX:41923740:G:C	G	C	SNV	SP4	jaspar2022	MA0685.2	MA0685.2	ctccaaccCgtcgggag	0.727965	0.763883	9.50741	9.97564	weak	1	0.468235	0.0358699
chr16	83176997	chr16:83176997:A:G	A	G	SNV	CTCF	jaspar2022	MA1930.1	MA1930.1	tttttaccccggatgccatgatgaggcactgccAtccactggagcttgctgtgattatggaaatgttc	0.668785	0.636271	11.1294	10.6262	weak	1	-0.503231	-0.0309569
chrX	149540994	chrX:149540994:C:T	C	T	SNV	CREM	jaspar2022	MA0609.2	MA0609.2	tcgtgaaagggatgaCgggagctgtatgaaa	0.690771	0.608882	6.97311	6.18775	strong	1	-0.78536	-0.0790197
chr5	169914947	chr5:169914947:C:A	C	A	SNV	SOX8	jaspar2022	MA0868.2	MA0868.2	cagcgcctgAccagagctg	0.441754	0.592198	4.07415	5.40805	strong	1	1.33389	0.14782
chr19	17395124	chr19:17395124:A:C	A	C	SNV	CTCF	jaspar2022	MA1930.1	MA1930.1	cggccccgtcttcccgcctgctcgccactgggcCgccagagggcgatcttacaacgtgattacaattg	0.692566	0.804666	11.4975	13.2325	strong	1	1.73503	0.106732
chr19	43804612	chr19:43804612:A:G	A	G	SNV	ZNF143	jaspar2022	MA0088.2	MA0088.2	atggacactcaccaaGctatgtcctccctta	0.609854	0.683018	11.9153	13.338	strong	1	1.42267	0.0729511
chr14	77979831	chr14:77979831:T:C	T	C	SNV	CTCF	jaspar2022	MA1930.1	MA1930.1	ggaaaacgccctcaagtggaggagcactagaggTgggagctgccccctaggggtctcagtaatcctcc	0.705993	0.665341	11.7053	11.0761	weak	1	-0.629195	-0.0387058
chr21	26930239	chr21:26930239:T:G	T	G	SNV	NFIC	jaspar2022	MA1527.1	MA1527.1	aactgaaaaatccttgGcatattgccagaaagc	0.880835	0.996581	15.1677	17.1454	strong	1	1.97779	0.114962
chr3	175590152	chr3:175590152:C:T	C	T	SNV	NFIC	jaspar2022	MA1527.1	MA1527.1	cgggaggtggagctggCagtgagccaagattgg	0.996661	0.879876	17.1468	15.1513	strong	1	-1.99554	-0.115994
chr13	89434829	chr13:89434829:A:G	A	G	SNV	CTCF	jaspar2022	MA1930.1	MA1930.1	cagttccataagctcgagaactcacacactcccAgaagatggcactatccccttcatcatggagcatc	0.764001	0.731487	12.6032	12.0999	weak	1	-0.503231	-0.0309569
chr19	495871	chr19:495871:C:T	C	T	SNV	NEUROD1	jaspar2022	MA1109.1	MA1109.1	cgcggtggctcaCgcctgtgatctc	0.66396	0.606356	7.39787	6.76867	weak	1	-0.629204	-0.056847
chr9	121594597	chr9:121594597:T:C	T	C	SNV	CTCF	jaspar2022	MA1930.1	MA1930.1	caatgaagaccaagcagtcagtccagcaggtggCggggttgctttttccttttgacagtttggaatga	0.628786	0.656388	10.5104	10.9376	weak	1	0.427214	0.0262806
chr12	118731335	chr12:118731335:C:T	C	T	SNV	NFIC	jaspar2022	MA1527.1	MA1527.1	tgttctggcttgaagcCagttaagcaggaggag	0.935724	0.819978	16.1056	14.1278	strong	1	-1.97779	-0.114962
chr1	154348608	chr1:154348608:G:T	G	T	SNV	CTCF	jaspar2022	MA0139.1	MA0139.1	ggcctcatgtgaacactgGggggctctgtggggccat	0.777776	0.638002	10.7586	8.87257	strong	1	-1.88604	-0.137095
chr1	201538922	chr1:201538922:T:C	T	C	SNV	NR2F2	jaspar2022	MA1111.1	MA1111.1	ctctgcgggtCaaactggcac	0.655582	0.768906	6.84147	8.00028	strong	1	1.15881	0.111818
chr17	78241882	chr17:78241882:C:T	C	T	SNV	NEUROD1	jaspar2022	MA1109.1	MA1109.1	tagacaacatgaCatcaggctcaaa	0.73262	0.587876	8.14783	6.56681	strong	1	-1.58102	-0.142841
chr20	14776001	chr20:14776001:A:C	A	C	SNV	NFIC	jaspar2022	MA1527.1	MA1527.1	tccctggagtccagccAatctggctgctttgat	0.846332	0.731461	14.5781	12.6153	strong	1	-1.96284	-0.114093
chr3	57100218	chr3:57100218:C:T	C	T	SNV	BHLHE40	jaspar2022	MA0464.2	MA0464.2	ttttcagcaCgtgctgatc	0.987257	0.824994	11.6112	9.71761	strong	1	-1.89358	-0.16102
chr2	196558694	chr2:196558694:G:A	G	A	SNV	NFIC	jaspar2022	MA0161.2	MA0161.2	atccctgctgGctctgatcca	0.616865	0.565876	6.08144	5.59391	weak	1	-0.487527	-0.0500298
chr9	102153597	chr9:102153597:C:T	C	T	SNV	NR2F1	jaspar2022	MA0017.2	MA0017.2	ctcgccctgcttTggcttgtgcacg	0.528222	0.590747	6.44797	7.19099	strong	1	0.743013	0.061639
chr12	80413657	chr12:80413657:C:T	C	T	SNV	CTCF	jaspar2022	MA1929.1	MA1929.1	tgatgggcttaatcatgaaggagtagaaattagCcagcaggtgacagtagggaggcagaaagatgct	0.609744	0.56721	8.61479	8.07088	weak	1	-0.543906	-0.0399779
chr16	813838	chr16:813838:G:A	G	A	SNV	CTCF	jaspar2022	MA1929.1	MA1929.1	ctggggtctcccgccgtcctcgccgtcaccaccAggtggagccacaggtccgtgtgatcgtccccgt	0.824215	0.869744	11.3573	11.9395	weak	1	0.582197	0.0427924
chr1	39609786	chr1:39609786:C:T	C	T	SNV	CTCF	jaspar2022	MA1929.1	MA1929.1	gggagactcggtggcctgcagtgttcaaagcgcCctctggcggccgggaggagcgggggctgcaggg	0.799736	0.757202	11.0443	10.5004	weak	1	-0.543906	-0.0399779
chr22	19144872	chr22:19144872:G:A	G	A	SNV	CTCF	jaspar2022	MA0139.1	MA0139.1	tgctgtgaacacgaggggGtgctgtggaggtggcggg	0.846196	0.775724	11.6818	10.7309	strong	1	-0.950917	-0.0691214
chr9	62802442	chr9:62802442:A:G	A	G	SNV	SOX8	jaspar2022	MA0868.2	MA0868.2	ctagacgccAgcagcggcg	0.482721	0.427192	4.43739	3.94504	weak	1	-0.492347	-0.0545611
chrX	71254216	chrX:71254216:C:T	C	T	SNV	MEF2A	jaspar2022	MA0052.4	MA0052.4	accaaccccattggTtggctcgaggaggg	0.483296	0.543032	5.2232	5.83121	weak	1	0.608013	0.0580036
chr9	40992220	chr9:40992220:C:T	C	T	SNV	CTCF	jaspar2022	MA1929.1	MA1929.1	gcgcgcagacacctttcggccctctgcagccgcTatagctccccagcagaaacccggaagtggaaat	0.581151	0.624495	8.24916	8.80342	weak	1	0.554259	0.0407389
chr12	29309518	chr12:29309518:G:C	G	C	SNV	CTCF	jaspar2022	MA1930.1	MA1930.1	catcaaggacttttctttagttaccacaagatgGgggtatttcctcctttttgcagtttataatctca	0.808989	0.757023	13.2995	12.4952	strong	1	-0.804312	-0.0494783
chr5	1666447	chr5:1666447:T:C	T	C	SNV	SRF	jaspar2022	MA0083.3	MA0083.3	agaacgtgggaatccCgtgtcaggtgtctct	0.532345	0.627411	10.2778	12.0786	strong	1	1.80075	0.094102
chr14	104846256	chr14:104846256:T:C	T	C	SNV	NFIC	jaspar2022	MA0161.2	MA0161.2	cccaggaatcTggccaccagc	0.698599	0.615765	6.86293	6.07092	strong	1	-0.792002	-0.0812749
chr8	61341388	chr8:61341388:C:T	C	T	SNV	SOX8	jaspar2022	MA0868.2	MA0868.2	tgtcctctgTggtccattt	0.526026	0.642373	4.82134	5.85291	strong	1	1.03158	0.114318
chr5	35815744	chr5:35815744:G:C	G	C	SNV	CTCF	jaspar2022	MA0139.1	MA0139.1	ctgtttctgttcttgctcCccctacaggctgttttta	0.728227	0.859942	10.09	11.8673	strong	1	1.77731	0.129191
chr3	197627986	chr3:197627986:C:A	C	A	SNV	MAZ	jaspar2022	MA1522.1	MA1522.1	gtctaaggggAggggacgccg	0.856568	0.998571	11.476	13.3647	strong	1	1.8887	0.141119
chr19	47428355	chr19:47428355:G:C	G	C	SNV	SP4	jaspar2022	MA0685.2	MA0685.2	cgactgacGaatggggg	0.602864	0.517298	7.87658	6.76113	strong	1	-1.11546	-0.0854513
chr15	34722680	chr15:34722680:G:A	G	A	SNV	CTCF	jaspar2022	MA1930.1	MA1930.1	cagtgattcattcccagattgcaccctctagctGtgccagggaggagaggaaaaagaaggaaaaacag	0.7018	0.659039	11.6404	10.9786	weak	1	-0.661842	-0.0407141
chr17	64919496	chr17:64919496:A:T	A	T	SNV	ZEB1	jaspar2022	MA0103.3	MA0103.3	tgagctgagcTgcctacgagc	0.510042	0.667239	5.36716	6.99566	strong	1	1.6285	0.155943
chr1	209590628	chr1:209590628:A:G	A	G	SNV	CTCF	jaspar2022	MA0139.1	MA0139.1	tcattccatggaagctccAgaagagggagtgatggac	0.85833	0.799622	11.8456	11.0534	strong	1	-0.792178	-0.0575828
chr5	180159913	chr5:180159913:C:T	C	T	SNV	MEF2A	jaspar2022	MA0052.4	MA0052.4	tgaatgtgagctgcTgtggctgcccagcc	0.354621	0.43402	3.91352	4.72166	strong	1	0.808139	0.0770953
chr18	23503333	chr18:23503333:G:A	G	A	SNV	CREB1	jaspar2022	MA0018.4	MA0018.4	ccgggtcacgccAccgcgttccgac	0.569413	0.723666	5.97656	7.52744	strong	1	1.55088	0.150487
chr15	66152096	chr15:66152096:A:G	A	G	SNV	CTCF	jaspar2022	MA0139.1	MA0139.1	cattccaggagctctagcGccaccttgcccacctgct	0.63657	0.683558	8.85324	9.48728	weak	1	0.634036	0.0460876
chr8	27311385	chr8:27311385:G:A	G	A	SNV	PKNOX1	jaspar2022	MA0782.2	MA0782.2	gccaatcgtgcgggAgggatggcgagggg	0.547488	0.590167	6.05936	6.5074	weak	1	0.448036	0.0414474
chr14	106039598	chr14:106039598:A:G	A	G	SNV	CTCF	jaspar2022	MA1929.1	MA1929.1	cctctgtggttgactgatcagtgggtcctgagcGccccctgcagctcattagcccaggtgttcctgg	0.677554	0.709076	9.4819	9.88499	weak	1	0.403086	0.0296274
chr10	38402947	chr10:38402947:G:A	G	A	SNV	NEUROD1	jaspar2022	MA1109.1	MA1109.1	ccctgtgacgtcAcaagggcgcgcc	0.535998	0.700265	6.00016	7.79442	strong	1	1.79426	0.162107
chr10	120942993	chr10:120942993:C:A	C	A	SNV	ZKSCAN1	jaspar2022	MA1585.1	MA1585.1	tgtctcagcAggcaccggg	0.620136	0.772456	7.88441	9.78617	strong	1	1.90176	0.150609
chr2	41213821	chr2:41213821:T:G	T	G	SNV	NFIC	jaspar2022	MA0161.2	MA0161.2	ataagggattGgcattctgcc	0.703716	0.869788	6.91185	8.49973	strong	1	1.58788	0.162947
chr1	38012514	chr1:38012514:G:C	G	C	SNV	EGR1	jaspar2022	MA0162.4	MA0162.4	gcgggccaagcgcGaaggcgagatctg	0.775307	0.658066	8.02522	6.85822	strong	1	-1.167	-0.113723
chr9	109235090	chr9:109235090:T:G	T	G	SNV	NFIC	jaspar2022	MA0161.2	MA0161.2	accaattcttGactctatgcc	0.568695	0.734768	5.62087	7.20875	strong	1	1.58788	0.162947
chr20	700228	chr20:700228:C:T	C	T	SNV	NEUROD1	jaspar2022	MA1109.1	MA1109.1	caccctcccagaTgctcgccaacat	0.751919	0.88804	8.35863	9.84546	strong	1	1.48682	0.134331
chr22	22201283	chr22:22201283:G:A	G	A	SNV	CTCF	jaspar2022	MA0139.1	MA0139.1	cctgcagaccagcaggggGcgcggtgagaacttctct	0.963294	0.892822	13.2619	12.311	strong	1	-0.950917	-0.0691214
chr5	57138439	chr5:57138439:T:G	T	G	SNV	CTCF	jaspar2022	MA1930.1	MA1930.1	tctactgctgctataggatctgagcagtgctatGttacctataaatacaacctattgggctcaagcta	0.49016	0.555803	8.36476	9.38076	strong	1	1.016	0.0625005
chr2	61764342	chr2:61764342:G:C	G	C	SNV	EGR1	jaspar2022	MA0162.4	MA0162.4	cgcaacgatgggcGggacggggcagaa	0.712076	0.642151	7.39583	6.6998	weak	1	-0.696025	-0.0678269
chr4	8547243	chr4:8547243:G:A	G	A	SNV	CTCF	jaspar2022	MA1930.1	MA1930.1	tctctttccttacctgtaaaatgggtgaatggcGccctctttggccattttgaggatttggtagcctg	0.681278	0.653676	11.3228	10.8956	weak	1	-0.427214	-0.0262806
chr19	39053594	chr19:39053594:G:T	G	T	SNV	BHLHE41	jaspar2022	MA0636.1	MA0636.1	ccctgggcaTtaccaggca	0.471238	0.514982	6.80696	7.43687	weak	1	0.62991	0.0436798
chr22	36685352	chr22:36685352:C:A	C	A	SNV	NR2F1	jaspar2022	MA1538.1	MA1538.1	tgcccgccttctcaAgctctttccccacc	0.56712	0.601957	9.32156	9.88431	weak	1	0.562755	0.0344944
chr2	146949606	chr2:146949606:A:G	A	G	SNV	NFIC	jaspar2022	MA1527.1	MA1527.1	aaggtcattatttcttGgctacatgccaaatat	0.880363	0.997148	15.1596	17.1551	strong	1	1.99554	0.115994
chr19	39846440	chr19:39846440:C:T	C	T	SNV	SRF	jaspar2022	MA0083.3	MA0083.3	tcccgcccccgggccCcttccccgcccggag	0.444413	0.406571	8.61219	7.89538	strong	1	-0.716809	-0.0374583
chr9	108934109	chr9:108934109:G:C	G	C	SNV	SP1	jaspar2022	MA0079.5	MA0079.5	aggcagccCcagcactg	0.587882	0.735445	7.80533	9.75402	strong	1	1.94869	0.147097
chr2	176553874	chr2:176553874:C:A	C	A	SNV	MAZ	jaspar2022	MA1522.1	MA1522.1	cgggaaccgaCccctgaccgt	0.709851	0.602049	9.52459	8.09078	strong	1	-1.43381	-0.107131
chr10	70669027	chr10:70669027:C:G	C	G	SNV	CTCF	jaspar2022	MA1930.1	MA1930.1	ttaggacaaacctacagcagtgtccacagagggCtgctggtggcctgctgggagatggggttgcattt	0.65636	0.628005	10.9371	10.4983	weak	1	-0.438869	-0.0269976
chr9	764128	chr9:764128:G:T	G	T	SNV	CTCF	jaspar2022	MA1929.1	MA1929.1	gtagccttttcttaatttaaaagaatacaggacTcaggagagaaccacaccccgcagacccaggcgt	0.491489	0.530695	7.10262	7.60395	weak	1	0.501334	0.0368489
chr2	112055265	chr2:112055265:T:C	T	C	SNV	SP1	jaspar2022	MA0079.5	MA0079.5	ggctcctcCtctatctt	0.643276	0.79084	8.53686	10.4855	strong	1	1.94869	0.147097
chr17	7932247	chr17:7932247:A:G	A	G	SNV	KLF16	jaspar2022	MA0741.1	MA0741.1	gcgtagggggGggcgtgagag	0.833166	0.956906	9.52261	10.919	strong	1	1.39641	0.122435
chr14	93717077	chr14:93717077:C:G	C	G	SNV	SOX8	jaspar2022	MA0868.2	MA0868.2	acacaggctGtttcattaa	0.537898	0.653708	4.9266	5.95342	strong	1	1.02682	0.11379
chr20	50658954	chr20:50658954:G:T	G	T	SNV	NEUROD1	jaspar2022	MA1109.1	MA1109.1	taggtggcagatGgagttagcaagt	0.982514	0.822525	10.8774	9.12985	strong	1	-1.74753	-0.157885
chr7	56064217	chr7:56064217:C:G	C	G	SNV	NFIC	jaspar2022	MA0161.2	MA0161.2	gtggcgcagcCtgcgcatgtg	0.690144	0.579265	6.78209	5.72193	strong	1	-1.06016	-0.108793
chr19	53554523	chr19:53554523:C:G	C	G	SNV	EGR1	jaspar2022	MA0162.4	MA0162.4	cctccatgggtggGgggaccgactgtg	0.734447	0.893773	7.6185	9.20442	strong	1	1.58592	0.154546
chr19	1021250	chr19:1021250:C:T	C	T	SNV	KLF5	jaspar2022	MA0599.1	MA0599.1	tcggccgctCcagggggcg	0.770969	0.69983	8.8596	8.04527	strong	1	-0.814338	-0.070927
chr4	78939358	chr4:78939358:C:T	C	T	SNV	MAZ	jaspar2022	MA1522.1	MA1522.1	gctgccgctgCtgcccagggc	0.703561	0.559809	9.44094	7.52897	strong	1	-1.91197	-0.142858
chr11	18145219	chr11:18145219:C:A	C	A	SNV	CTCF	jaspar2022	MA1929.1	MA1929.1	tcttccccacattagagccgccttgggctccccCtactgtcatagccactctgtttcttcccaaatc	0.624007	0.581322	8.79718	8.25135	weak	1	-0.545825	-0.040119
chr18	40437614	chr18:40437614:T:G	T	G	SNV	CTCF	jaspar2022	MA0139.1	MA0139.1	ctatcctcaatttgaacaGatggcttggcattgctta	0.557196	0.644772	7.78221	8.96392	strong	1	1.18171	0.0858973
chr18	10304839	chr18:10304839:C:T	C	T	SNV	CTCF	jaspar2022	MA0139.1	MA0139.1	cccagggagctctccaccTagtggcaagttccaggga	0.800383	0.903057	11.0637	12.4491	strong	1	1.38544	0.100706
chr12	1339945	chr12:1339945:C:T	C	T	SNV	NEUROD1	jaspar2022	MA1109.1	MA1109.1	cacacatgcacaTtggcagggcaag	0.575396	0.680922	6.4305	7.58314	strong	1	1.15264	0.104138
chr8	143291367	chr8:143291367:C:A	C	A	SNV	ATF7	jaspar2022	MA0834.1	MA0834.1	agtgccgagggggAgggccaggggtgg	0.361604	0.424803	5.90209	6.92374	strong	1	1.02165	0.0629786
chr11	64653029	chr11:64653029:T:A	T	A	SNV	MEF2A	jaspar2022	MA0052.4	MA0052.4	gcctaccacgtgcaAgtgctcccccatgt	0.42474	0.471223	4.62721	5.10032	weak	1	0.473117	0.0451347
chr19	17539420	chr19:17539420:C:A	C	A	SNV	CTCF	jaspar2022	MA1930.1	MA1930.1	tgcgagcccagacccttcctggcctgcggggggCaggccgcgcccgcgcctgggcctggaccgaggta	0.739592	0.712227	12.2254	11.8018	weak	1	-0.423538	-0.0260545
chr2	127695843	chr2:127695843:C:T	C	T	SNV	SP1	jaspar2022	MA0079.5	MA0079.5	cacgcgagCgccgccag	0.697884	0.629614	9.258	8.35644	strong	1	-0.901556	-0.0680539
chr7	66413607	chr7:66413607:G:A	G	A	SNV	SP1	jaspar2022	MA0079.5	MA0079.5	cgggggagGggggcctg	0.960114	0.853035	12.7209	11.3069	strong	1	-1.41406	-0.10674
chr7	75572587	chr7:75572587:C:A	C	A	SNV	SOX8	jaspar2022	MA0868.2	MA0868.2	ctgccactgAcatcatgcc	0.556157	0.616823	5.08849	5.62638	weak	1	0.537891	0.0596082
chr11	116217207	chr11:116217207:G:A	G	A	SNV	CTCF	jaspar2022	MA1930.1	MA1930.1	acaaggcaacactgctctccacgctcaccagacGgcgctgtgcagtgttcccagaagcgtctattcgg	0.626895	0.562311	10.4811	9.48149	strong	1	-0.999603	-0.0614919
chr3	184456277	chr3:184456277:G:A	G	A	SNV	NEUROD1	jaspar2022	MA1109.1	MA1109.1	catctggcgcctGgctcacacccag	0.649854	0.545644	7.24379	6.10552	strong	1	-1.13827	-0.102839
chr22	19432432	chr22:19432432:G:T	G	T	SNV	ZKSCAN1	jaspar2022	MA1585.1	MA1585.1	cggggacagTcgcgtccca	0.507872	0.667877	6.48276	8.48047	strong	1	1.99771	0.158208
chr19	12933730	chr19:12933730:C:A	C	A	SNV	NR2F1	jaspar2022	MA0017.2	MA0017.2	cgtgtccgggccAgggtgggcgggg	0.588674	0.697801	7.16634	8.46315	strong	1	1.2968	0.10758
chr14	99896615	chr14:99896615:G:A	G	A	SNV	NFIC	jaspar2022	MA0161.2	MA0161.2	gcatcttgccAggttactttt	0.731916	0.855929	7.18148	8.36722	strong	1	1.18574	0.12168
chr6	12011294	chr6:12011294:T:C	T	C	SNV	MAZ	jaspar2022	MA1522.1	MA1522.1	cgcctcccccTcccccattct	0.999361	0.856698	13.3752	11.4777	strong	1	-1.89749	-0.141776
chr10	86355881	chr10:86355881:G:A	G	A	SNV	CTCF	jaspar2022	MA0139.1	MA0139.1	ggagagggctgccacttcGtggggcagcaggggcaag	0.793184	0.762346	10.9665	10.5504	weak	1	-0.416114	-0.030247
chr10	133497518	chr10:133497518:G:C	G	C	SNV	CTCF	jaspar2022	MA0139.1	MA0139.1	acgctactgctagaccacCgtctgcttggcaatgggc	0.594008	0.725723	8.27893	10.0562	strong	1	1.77731	0.129191
chr5	135645122	chr5:135645122:G:A	G	A	SNV	NFIC	jaspar2022	MA0161.2	MA0161.2	attaaatggcAtacgggagcg	0.615294	0.725257	6.06642	7.11781	strong	1	1.0514	0.107894
chr15	77915799	chr15:77915799:C:T	C	T	SNV	NEUROD1	jaspar2022	MA1109.1	MA1109.1	cctgcagctcccTgtgcccatgccc	0.624906	0.706666	6.97129	7.86434	strong	1	0.893045	0.0806843
chr8	138384558	chr8:138384558:T:C	T	C	SNV	NEUROD1	jaspar2022	MA1109.1	MA1109.1	atggggcaagacCatctgctcccaa	0.821137	0.982435	9.11469	10.8765	strong	1	1.76183	0.159177
chr16	59591652	chr16:59591652:G:C	G	C	SNV	CTCF	jaspar2022	MA0139.1	MA0139.1	aatagacatactccacagGtggcagcatttctacatg	0.7886	0.745311	10.9047	10.3205	weak	1	-0.584116	-0.0424589
chrX	71254216	chrX:71254216:C:T	C	T	SNV	NR3C1	jaspar2022	MA0113.3	MA0113.3	caaccaaccccattggCtggctcgaggaggggg	0.500122	0.408139	8.66226	7.09148	strong	1	-1.57078	-0.0913315
chr10	54869232	chr10:54869232:C:T	C	T	SNV	NFIC	jaspar2022	MA1527.1	MA1527.1	agggattggagttatgTagctacaagccaaaga	0.710505	0.82729	12.2572	14.2527	strong	1	1.99554	0.115994
chr19	46513644	chr19:46513644:C:T	C	T	SNV	CTCF	jaspar2022	MA1929.1	MA1929.1	ccggcgctttagccagcggtcctgcagcgccccCtggtggggaacacgagcgcgtcgcctgttgtct	0.80724	0.692334	11.1403	9.67091	strong	1	-1.46935	-0.108
chr1	27031799	chr1:27031799:T:C	T	C	SNV	SP1	jaspar2022	MA0079.5	MA0079.5	cgccctgcCagccccat	0.660906	0.767985	8.76967	10.1837	strong	1	1.41406	0.10674
chr16	10086794	chr16:10086794:A:G	A	G	SNV	NFIC	jaspar2022	MA1527.1	MA1527.1	gcagtgctaggctgccAagctctaaaaataccc	0.751978	0.635656	12.9658	10.9782	strong	1	-1.98762	-0.115533
chr13	113821971	chr13:113821971:A:G	A	G	SNV	NFIC	jaspar2022	MA1527.1	MA1527.1	tacctggcaggccgccAgcaaaggtgagcacgg	0.972881	0.857738	16.7405	14.773	strong	1	-1.96749	-0.114363
chrX	135098909	chrX:135098909:C:A	C	A	SNV	CLOCK	jaspar2022	MA0819.2	MA0819.2	gccccgcccAccagcatag	0.486329	0.666527	4.76988	6.51549	strong	1	1.74561	0.179112
chr2	197453301	chr2:197453301:A:C	A	C	SNV	SP4	jaspar2022	MA0685.2	MA0685.2	cgcacgggCaaagcgat	0.6405	0.679122	8.36721	8.87069	weak	1	0.503481	0.03857
chr1	16913942	chr1:16913942:A:G	A	G	SNV	KLF5	jaspar2022	MA0599.1	MA0599.1	ggcgcacggGgcgtgtccg	0.677257	0.851878	7.78687	9.78578	strong	1	1.99891	0.1741
chr13	29801133	chr13:29801133:C:T	C	T	SNV	NR2F1	jaspar2022	MA1538.1	MA1538.1	ggtactgcccttgcCaccctcaagctgag	0.55492	0.473629	9.12446	7.81128	strong	1	-1.31318	-0.0804926
chr19	21767600	chr19:21767600:T:C	T	C	SNV	SP4	jaspar2022	MA0685.2	MA0685.2	ggaagccgCccagtccg	0.6325	0.781987	8.26291	10.2116	strong	1	1.94873	0.149286
chr9	40992190	chr9:40992190:C:T	C	T	SNV	ATF7	jaspar2022	MA0834.1	MA0834.1	gggagcagatgcgTgcagacacctttc	0.476126	0.560807	7.75341	9.12233	strong	1	1.36892	0.0843858
chrX	103585493	chrX:103585493:G:T	G	T	SNV	BHLHE41	jaspar2022	MA0636.1	MA0636.1	gaactcctgTgctgcggca	0.563582	0.655506	8.1367	9.46041	strong	1	1.3237	0.0917894
chr6	95280874	chr6:95280874:C:T	C	T	SNV	CTCF	jaspar2022	MA1929.1	MA1929.1	gccattctatgctacttaatggagagctccatcTggtggtcacttgttaagcaactcaatgcttcac	0.714972	0.760501	9.96038	10.5426	weak	1	0.582197	0.0427924
chrX	119853214	chrX:119853214:T:C	T	C	SNV	KLF5	jaspar2022	MA0599.1	MA0599.1	cattagcaaCtccgccatc	0.639321	0.734386	7.35261	8.44083	strong	1	1.08822	0.0947813
chr19	43951110	chr19:43951110:G:C	G	C	SNV	CTCF	jaspar2022	MA1930.1	MA1930.1	aagctatgtgtagttgcaacacttccccctggaGggtaaaactgtgaacgtttactccttgggcattc	0.667932	0.565878	11.1162	9.5367	strong	1	-1.57954	-0.0971676
chr4	157151286	chr4:157151286:A:G	A	G	SNV	NFIC	jaspar2022	MA0161.2	MA0161.2	acttagaatgGcagtttgcca	0.592742	0.724047	5.85079	7.10625	strong	1	1.25546	0.128835
chr12	32305347	chr12:32305347:C:G	C	G	SNV	CTCF	jaspar2022	MA0139.1	MA0139.1	attgggcaaacagtgcccCcttttgaccactggatcc	0.870626	0.827337	12.0115	11.4274	weak	1	-0.584116	-0.0424589
chr13	28394633	chr13:28394633:T:C	T	C	SNV	SP1	jaspar2022	MA0079.5	MA0079.5	gttcccctCttctctta	0.517424	0.664987	6.87488	8.82356	strong	1	1.94869	0.147097
chr18	9775375	chr18:9775375:A:G	A	G	SNV	RELB	jaspar2022	MA1117.1	MA1117.1	cctgtatgtcAttctccttcg	0.822696	0.710953	7.42023	6.44506	strong	1	-0.975172	-0.108744
chr9	40992221	chr9:40992221:A:G	A	G	SNV	BHLHE40	jaspar2022	MA0464.2	MA0464.2	gcagccgccGtagctcccc	0.37382	0.479291	4.4525	5.68333	strong	1	1.23082	0.104663
chr9	129607471	chr9:129607471:T:G	T	G	SNV	NR2F1	jaspar2022	MA1538.1	MA1538.1	gggtgtgtggtgtgTggtgtggtgtgtgt	0.507018	0.451171	8.35065	7.4485	strong	1	-0.902151	-0.055298
chr1	109761309	chr1:109761309:G:C	G	C	SNV	CTCF	jaspar2022	MA1930.1	MA1930.1	ggcctgctctgttcaatctgaccacccctccccCtccctgacactgagcagatgctctggcaggcttg	0.573224	0.602079	9.6504	10.097	weak	1	0.446606	0.0274735
chr19	14518738	chr19:14518738:G:A	G	A	SNV	SP1	jaspar2022	MA0079.5	MA0079.5	ggtcagtaGgtcgggac	0.662154	0.51459	8.78615	6.83746	strong	1	-1.94869	-0.147097
chr3	75785697	chr3:75785697:G:C	G	C	SNV	SP4	jaspar2022	MA0685.2	MA0685.2	cggtccccCgttaggaa	0.597948	0.633866	7.81249	8.28073	weak	1	0.468235	0.0358699
chr11	94603265	chr11:94603265:T:C	T	C	SNV	CTCF	jaspar2022	MA1930.1	MA1930.1	ttagtatctgcagtcatggggttgatggtcctgCcacctgctgggcgagttttaaaaagccgctgggc	0.740621	0.793086	12.2413	13.0533	strong	1	0.812034	0.0499533
chr9	91078471	chr9:91078471:C:A	C	A	SNV	CTCF	jaspar2022	MA0139.1	MA0139.1	agaggggatgctgccgggAgatggctctcacagcacg	0.74207	0.847377	10.2768	11.6978	strong	1	1.42096	0.103289
chr5	20833417	chr5:20833417:A:G	A	G	SNV	CTCF	jaspar2022	MA1930.1	MA1930.1	tatggggccagttttcaggcccaccactatgggGagccaactattgccttgtagtaatgttggttttg	0.641134	0.6936	10.7015	11.5135	strong	1	0.812034	0.0499533
chr19	4400673	chr19:4400673:C:G	C	G	SNV	ATF7	jaspar2022	MA0834.1	MA0834.1	gcacattgtctacGgcgggagaggccg	0.427786	0.516537	6.97195	8.40668	strong	1	1.43472	0.0884423
chr1	16393617	chr1:16393617:T:C	T	C	SNV	KLF5	jaspar2022	MA0599.1	MA0599.1	acttgctgaCcccagcctg	0.713016	0.808081	8.19621	9.28443	strong	1	1.08822	0.0947813
chr10	133497518	chr10:133497518:G:C	G	C	SNV	CTCF	jaspar2022	MA1930.1	MA1930.1	ttttccttgacactaacgctactgctagaccacCgtctgcttggcaatgggcatcttcccagatgctg	0.620767	0.66478	10.3862	11.0675	weak	1	0.681211	0.0419056
chr21	10806362	chr21:10806362:A:G	A	G	SNV	E2F1	jaspar2022	MA0024.3	MA0024.3	agctacatgaaGagaaaggttca	0.279826	0.39739	3.29364	4.61256	strong	1	1.31892	0.115968
chr2	231614910	chr2:231614910:C:A	C	A	SNV	SP1	jaspar2022	MA0079.5	MA0079.5	cacctcccCcctccacg	0.926663	0.810564	12.2792	10.746	strong	1	-1.53318	-0.115732
chr6	71560451	chr6:71560451:T:C	T	C	SNV	NFIC	jaspar2022	MA0161.2	MA0161.2	tggcagtgtgCcagagcagct	0.570756	0.724985	5.64057	7.11522	strong	1	1.47464	0.151327
chr20	14776001	chr20:14776001:A:C	A	C	SNV	NFIC	jaspar2022	MA0161.2	MA0161.2	gagtccagccAatctggctgc	0.760956	0.617686	7.45915	6.08929	strong	1	-1.36986	-0.140574
chr13	109577576	chr13:109577576:G:A	G	A	SNV	NFIC	jaspar2022	MA1527.1	MA1527.1	agaatcttgctggactGgcccatgactgggaca	0.605591	0.502322	10.4645	8.69989	strong	1	-1.76458	-0.102569
chr2	90392334	chr2:90392334:T:C	T	C	SNV	E2F1	jaspar2022	MA0024.3	MA0024.3	ggaatcatcatCgaatggaatcg	0.3381	0.398648	3.9474	4.62668	weak	1	0.679273	0.0597264
chr19	45703017	chr19:45703017:G:A	G	A	SNV	NR2F1	jaspar2022	MA1538.1	MA1538.1	tgtgccgcattctcActgtgttcctggct	0.464749	0.507826	7.66784	8.36371	weak	1	0.695868	0.0426537
chr22	41286010	chr22:41286010:G:T	G	T	SNV	CTCF	jaspar2022	MA1929.1	MA1929.1	tgactctaccgtaaacaggcggcgccgccgcgtGgggggaatcgagcgcgcgcctccgccctctggg	0.779342	0.669918	10.7835	9.38426	strong	1	-1.39925	-0.102847
chr14	54699397	chr14:54699397:A:G	A	G	SNV	SP1	jaspar2022	MA0079.5	MA0079.5	ctgaggtcGtctgtgcc	0.489639	0.524218	6.50795	6.9646	weak	1	0.456652	0.0344704
chr1	8138045	chr1:8138045:G:T	G	T	SNV	SOX8	jaspar2022	MA0868.2	MA0868.2	ttctctctgTtcgcagaaa	0.590308	0.702299	5.39129	6.38425	strong	1	0.992955	0.110038
chr22	19121035	chr22:19121035:T:C	T	C	SNV	MAZ	jaspar2022	MA1522.1	MA1522.1	acattccacaCagatgacaca	0.42714	0.554945	5.76443	7.46427	strong	1	1.69985	0.127009
chr3	175590152	chr3:175590152:C:T	C	T	SNV	NFIC	jaspar2022	MA0161.2	MA0161.2	gtggagctggCagtgagccaa	0.72591	0.586891	7.12406	5.79484	strong	1	-1.32922	-0.136404
chr2	241595772	chr2:241595772:G:A	G	A	SNV	CTCF	jaspar2022	MA1930.1	MA1930.1	tccaccaccagctccccgtaccgaggcaactgtGcctccctctaccagcagagggtgacatgagaatc	0.6556	0.627023	10.9254	10.4831	weak	1	-0.442307	-0.0272091
chr18	9334523	chr18:9334523:T:A	T	A	SNV	NEUROD1	jaspar2022	MA1109.1	MA1109.1	cgggcgggagccAgcggtggaggcg	0.591857	0.727719	6.6103	8.0943	strong	1	1.484	0.134076
chr17	1921248	chr17:1921248:C:T	C	T	SNV	NFIC	jaspar2022	MA0161.2	MA0161.2	gccggttctgCcaaggactcg	0.999119	0.842998	9.73631	8.24358	strong	1	-1.49273	-0.153183
chr11	2700338	chr11:2700338:T:C	T	C	SNV	MEF2A	jaspar2022	MA0052.4	MA0052.4	tcgccggggtgagcTggagacacgggcca	0.543309	0.487526	5.83402	5.26626	weak	1	-0.567769	-0.0541644
chr17	46266731	chr17:46266731:G:C	G	C	SNV	MAZ	jaspar2022	MA1522.1	MA1522.1	ccctgggagcGgagcggggat	0.862871	0.735114	11.5598	9.8606	strong	1	-1.69923	-0.126962
chr5	60521569	chr5:60521569:T:G	T	G	SNV	CTCF	jaspar2022	MA0139.1	MA0139.1	attcactgaaactgcagtGtccccttctgtcaaaggg	0.762284	0.817107	10.5496	11.2893	strong	1	0.739752	0.0537719
chr22	22201294	chr22:22201294:A:C	A	C	SNV	CTCF	jaspar2022	MA0139.1	MA0139.1	gcagggggcgcggtgagaCcttctctgtgtatttctg	0.519376	0.588378	7.27188	8.20296	strong	1	0.931078	0.0676793
chr13	92187645	chr13:92187645:A:G	A	G	SNV	OLIG2	jaspar2022	MA0678.1	MA0678.1	caacaatctGgaaagaagc	0.548127	0.675401	6.3017	7.74822	strong	1	1.44652	0.126473
chrX	119791742	chrX:119791742:C:T	C	T	SNV	MEF2A	jaspar2022	MA0052.4	MA0052.4	tagcggtgcgctccTgtggcgccgtggga	0.309894	0.4303	3.45828	4.6838	strong	1	1.22552	0.116913
chrX	23667305	chrX:23667305:A:G	A	G	SNV	BHLHE41	jaspar2022	MA0636.1	MA0636.1	ggtcaggagAccttgtcgc	0.731442	0.672853	10.5539	9.7102	strong	1	-0.843671	-0.0585026
chr9	40992038	chr9:40992038:G:A	G	A	SNV	ZKSCAN1	jaspar2022	MA1585.1	MA1585.1	cacgggaccGtcgccagcc	0.524142	0.467674	6.68589	5.98089	strong	1	-0.705008	-0.0558328
chr9	93064689	chr9:93064689:G:C	G	C	SNV	SP1	jaspar2022	MA0079.5	MA0079.5	gcgggcagGgggaggag	0.938403	0.81639	12.4342	10.823	strong	1	-1.61128	-0.121627
chr11	130406384	chr11:130406384:G:C	G	C	SNV	TBR1	jaspar2022	MA0802.1	MA0802.1	ttgaggtatGtgggtgttg	0.656706	0.539077	7.40717	6.11012	strong	1	-1.29706	-0.115886
chr12	112738743	chr12:112738743:G:A	G	A	SNV	MEF2A	jaspar2022	MA0052.4	MA0052.4	cccatcacagcagaAcagttcagccaact	0.495126	0.560043	5.34361	6.00435	weak	1	0.660741	0.0630338
chr19	46513644	chr19:46513644:C:T	C	T	SNV	CTCF	jaspar2022	MA1930.1	MA1930.1	ccggcgctttagccagcggtcctgcagcgccccCtggtggggaacacgagcgcgtcgcctgttgtctg	0.711208	0.64421	11.7861	10.7491	strong	1	-1.03697	-0.0637908
chrX	119791742	chrX:119791742:C:T	C	T	SNV	NFIC	jaspar2022	MA0161.2	MA0161.2	ggtgcgctccCgtggcgccgt	0.746005	0.615935	7.3162	6.07255	strong	1	-1.24365	-0.127623
chr11	121367614	chr11:121367614:G:T	G	T	SNV	NFIC	jaspar2022	MA1527.1	MA1527.1	cccttgggaaatttaaTtggccttttgccaatg	0.962744	0.996233	16.5673	17.1395	weak	1	0.572241	0.0332624
chr22	47968043	chr22:47968043:C:T	C	T	SNV	ZNF24	jaspar2022	MA1124.1	MA1124.1	ccacctggtgctTggctaggaccca	0.356136	0.461616	5.80649	7.4242	strong	1	1.61771	0.103162
chr15	33735792	chr15:33735792:G:A	G	A	SNV	CTCF	jaspar2022	MA1930.1	MA1930.1	gtagtgagaatttcatggcccagatcataaggcGgagggctttaaagttctcttcaaatcgcaccagt	0.739779	0.637062	12.2283	10.6385	strong	1	-1.5898	-0.0977989
chr16	1659718	chr16:1659718:A:G	A	G	SNV	NFIB	jaspar2022	MA1643.1	MA1643.1	tttaaaactggcaagctgccAagcgactctggggacactga	0.959499	0.883811	16.0317	14.7961	strong	1	-1.23558	-0.0740183
chr15	62283037	chr15:62283037:G:A	G	A	SNV	NFIC	jaspar2022	MA0161.2	MA0161.2	cccataattgGcaccaagcca	0.871012	0.749751	8.51143	7.35201	strong	1	-1.15942	-0.118979
chr11	121367614	chr11:121367614:G:T	G	T	SNV	NFIC	jaspar2022	MA0161.2	MA0161.2	ggaaatttaaTtggccttttg	0.617296	0.760129	6.08556	7.45124	strong	1	1.36568	0.140146
chr8	83825137	chr8:83825137:C:T	C	T	SNV	CTCF	jaspar2022	MA1930.1	MA1930.1	cgttcaagtccagcctgagctaaatagcgacacCtggtggctaaaaaaatagctggctgatgtggtgc	0.799865	0.720719	13.1582	11.9333	strong	1	-1.22498	-0.0753564
chr22	20206338	chr22:20206338:G:C	G	C	SNV	SP1	jaspar2022	MA0079.5	MA0079.5	tctctacgCagcacttc	0.489765	0.576084	6.50962	7.64953	strong	1	1.13991	0.0860458
chr13	26518132	chr13:26518132:G:C	G	C	SNV	ZNF24	jaspar2022	MA1124.1	MA1124.1	cgcagctcaccaGatggtgtgccct	0.41109	0.374376	6.6493	6.08623	weak	1	-0.563071	-0.0359075
chr13	48126052	chr13:48126052:T:C	T	C	SNV	NR3C1	jaspar2022	MA0113.3	MA0113.3	cagaaacgaaagggaaCattctgaactggaaac	0.747735	0.864306	12.8907	14.8814	strong	1	1.99068	0.115746
chr13	30134273	chr13:30134273:C:T	C	T	SNV	SOX8	jaspar2022	MA0868.2	MA0868.2	gactccttcTgtcagcagg	0.465074	0.639473	4.28092	5.8272	strong	1	1.54628	0.171356
chr18	12702611	chr18:12702611:G:A	G	A	SNV	NFIB	jaspar2022	MA1643.1	MA1643.1	tgccctaactgcgcggccccAgccgggccagggagcgttag	0.533378	0.580107	9.07548	9.83832	strong	1	0.762834	0.0456982
chr12	112418839	chr12:112418839:G:A	G	A	SNV	MEIS2	jaspar2022	MA1640.1	MA1640.1	ggtcctccgctgacAggaagcaggaagtg	0.480374	0.595456	5.13863	6.3079	strong	1	1.16926	0.112233
chr20	24931187	chr20:24931187:T:C	T	C	SNV	CTCF	jaspar2022	MA1929.1	MA1929.1	attccccttaggaaatattatatcatgggacccCtcccatattgcagggacttccaggcacttcctg	0.523076	0.590284	7.50653	8.36594	strong	1	0.859414	0.0631683
chr11	20112628	chr11:20112628:G:A	G	A	SNV	SP1	jaspar2022	MA0079.5	MA0079.5	cctgctctGggtctggc	0.620421	0.52513	8.23504	6.97664	strong	1	-1.2584	-0.0949902
chr11	115930427	chr11:115930427:C:G	C	G	SNV	OLIG2	jaspar2022	MA0678.1	MA0678.1	cagtccccaCatctgccca	0.751168	0.607777	8.60934	6.97965	strong	1	-1.62969	-0.142487
chr19	11797582	chr19:11797582:A:G	A	G	SNV	ZBTB7B	jaspar2022	MA0694.1	MA0694.1	ccgatcaatgaGgtgaataacct	0.516762	0.591774	6.49718	7.41635	strong	1	0.919169	0.0740157
chr15	24773224	chr15:24773224:C:G	C	G	SNV	REST	jaspar2022	MA0138.2	MA0138.2	gggaagacggtggccggcagCagccgatccactgcgcgcct	0.609277	0.584431	12.571	12.076	weak	1	-0.494959	-0.0243169
chr15	80943502	chr15:80943502:C:T	C	T	SNV	CTCF	jaspar2022	MA1929.1	MA1929.1	agacattccagtccaactgctacttggacaacgCcacctggacatcttgtatggaactgaattctca	0.689276	0.63268	9.6318	8.90808	strong	1	-0.72372	-0.0531945
chr2	1493670	chr2:1493670:A:G	A	G	SNV	NFIC	jaspar2022	MA1527.1	MA1527.1	agcctggcaaactgccAggcagtgtcacagggt	0.972444	0.857301	16.733	14.7655	strong	1	-1.96749	-0.114363
chr19	13234712	chr19:13234712:G:A	G	A	SNV	CTCF	jaspar2022	MA1930.1	MA1930.1	ccagaaaaggaggaggagggcacgccccctatcGgaagagaaggccggcacgtcccctaccggaagag	0.619812	0.583859	10.3715	9.815	weak	1	-0.556462	-0.0342315
chr15	65312834	chr15:65312834:C:A	C	A	SNV	CTCF	jaspar2022	MA1930.1	MA1930.1	aggcatctcttcaagcctagggagctcctccctCtggtagcagtgtgcagtcatttactggacatctg	0.603457	0.56268	10.1183	9.48719	weak	1	-0.631131	-0.0388248
chr12	107761244	chr12:107761244:C:G	C	G	SNV	NEUROD1	jaspar2022	MA1109.1	MA1109.1	caccgcgtcgccCttctcccagccc	0.682794	0.52106	7.60359	5.83699	strong	1	-1.76659	-0.159607
chr8	27311385	chr8:27311385:G:A	G	A	SNV	CTCF	jaspar2022	MA1930.1	MA1930.1	ctgagagacagcggcgctggccaatcgtgcgggAgggatggcgagggggagggagggggcgctcggag	0.602954	0.636569	10.1105	10.6308	weak	1	0.52027	0.0320051
chr4	1729926	chr4:1729926:C:T	C	T	SNV	CTCF	jaspar2022	MA0139.1	MA0139.1	ctagaccagggagccctcTagtggccctgtccgggcg	0.827053	0.929727	11.4235	12.809	strong	1	1.38544	0.100706
chr2	90392334	chr2:90392334:T:C	T	C	SNV	BHLHE40	jaspar2022	MA0464.2	MA0464.2	aatcatcatCgaatggaat	0.364607	0.512478	4.345	6.07062	strong	1	1.72562	0.146738
chr15	49620909	chr15:49620909:C:G	C	G	SNV	ZNF143	jaspar2022	MA0088.2	MA0088.2	cgtctaaccccccccGcgctgtcgtcccagc	0.538789	0.598685	10.5335	11.6981	strong	1	1.16466	0.0597212
chr9	127348293	chr9:127348293:C:G	C	G	SNV	CTCF	jaspar2022	MA1929.1	MA1929.1	tccacacatccacgtgtggctctaaggctccccCtttatgcctgagatggaaatgaactaagaagag	0.692698	0.621147	9.67555	8.7606	strong	1	-0.91495	-0.0672502
chr1	17873158	chr1:17873158:T:C	T	C	SNV	RELB	jaspar2022	MA1117.1	MA1117.1	tcaggtctgcTtcccctgtgc	0.878358	0.767043	7.906	6.93456	strong	1	-0.971439	-0.108328
chr15	24773224	chr15:24773224:C:G	C	G	SNV	SP4	jaspar2022	MA0685.2	MA0685.2	gccggcagGagccgatc	0.6405	0.751586	8.36721	9.81534	strong	1	1.44813	0.110936
chr3	126202450	chr3:126202450:T:A	T	A	SNV	RELB	jaspar2022	MA1117.1	MA1117.1	gttcagccagTtccatttcag	0.599007	0.473659	5.46812	4.37421	strong	1	-1.09391	-0.121985
chr1	17874368	chr1:17874368:G:A	G	A	SNV	NFIC	jaspar2022	MA0161.2	MA0161.2	acagaagccaAatggtcatct	0.616998	0.760737	6.08271	7.45705	strong	1	1.37434	0.141034
chr1	1306149	chr1:1306149:A:G	A	G	SNV	NR2F1	jaspar2022	MA1537.1	MA1537.1	ttcccagggcagtcGctctacggcaccta	0.464825	0.511388	8.67173	9.5345	strong	1	0.862774	0.0464153
chr5	97183792	chr5:97183792:A:G	A	G	SNV	ZNF143	jaspar2022	MA0088.2	MA0088.2	ctcttaggttggtctAggaggcttcgaagtg	0.542058	0.510459	10.597	9.98261	weak	1	-0.614433	-0.0315068
chr4	38170731	chr4:38170731:T:C	T	C	SNV	NFIC	jaspar2022	MA1527.1	MA1527.1	cttaaagattatttggCaaatttccaaatagta	0.788107	0.904892	13.5832	15.5787	strong	1	1.99554	0.115994
chr10	128097968	chr10:128097968:A:G	A	G	SNV	SRF	jaspar2022	MA0083.3	MA0083.3	aacaaacgtggagacAgggcactgcccgcac	0.504537	0.419911	9.75106	8.14808	strong	1	-1.60299	-0.0837673
chr19	43774629	chr19:43774629:G:A	G	A	SNV	CTCF	jaspar2022	MA0139.1	MA0139.1	catgaacagctgccggtaGggggccaagaagggaggg	0.861931	0.722468	11.8942	10.0123	strong	1	-1.88185	-0.13679
chr9	86637600	chr9:86637600:T:G	T	G	SNV	CTCF	jaspar2022	MA1930.1	MA1930.1	ccggctgggcttgttcagcctgtgcttgtcggcGccagcttgggtcaaacgtgagcggctggacatca	0.68825	0.715615	11.4307	11.8543	weak	1	0.423538	0.0260545
chr4	108620460	chr4:108620460:T:C	T	C	SNV	SP4	jaspar2022	MA0685.2	MA0685.2	tgcatctcCgcccacgt	0.800918	0.950405	10.4584	12.4072	strong	1	1.94873	0.149286
chr1	17874368	chr1:17874368:G:A	G	A	SNV	ZEB1	jaspar2022	MA0103.3	MA0103.3	acagaagccaGatggtcatct	0.813554	0.658232	8.51143	6.90235	strong	1	-1.60908	-0.154083
chr2	196850089	chr2:196850089:G:T	G	T	SNV	CTCF	jaspar2022	MA1929.1	MA1929.1	tatttcctcatctttttcctgctgagccacaggGtggcagtggttgtagtgttcctgcacccaaggc	0.745342	0.708007	10.3487	9.87132	weak	1	-0.477417	-0.0350909
chr8	17641695	chr8:17641695:C:T	C	T	SNV	NFIC	jaspar2022	MA1527.1	MA1527.1	agctctgctcccagcaTggaataatccctttgt	0.509583	0.624726	8.82395	10.7914	strong	1	1.96749	0.114363
chr5	135645122	chr5:135645122:G:A	G	A	SNV	NFIC	jaspar2022	MA1527.1	MA1527.1	cagccaattaaatggcAtacgggagcgttgata	0.566731	0.600208	9.80046	10.3725	weak	1	0.572036	0.0332504
chr17	79228223	chr17:79228223:T:C	T	C	SNV	NFIC	jaspar2022	MA1527.1	MA1527.1	atccgtgggctctccgCgttccctccggcctgt	0.574779	0.601462	9.93798	10.3939	weak	1	0.455933	0.0265018
chr16	9976882	chr16:9976882:G:T	G	T	SNV	SP1	jaspar2022	MA0079.5	MA0079.5	accaagtcGtaccaggc	0.480803	0.442725	6.39127	5.88842	weak	1	-0.502852	-0.0379578
chr5	346695	chr5:346695:T:A	T	A	SNV	NR2F1	jaspar2022	MA0017.2	MA0017.2	cacctgcagaccTcagcctcaccct	0.812149	0.747659	9.82198	9.05562	strong	1	-0.766356	-0.0635755
chrX	119853214	chrX:119853214:T:C	T	C	SNV	RELB	jaspar2022	MA1117.1	MA1117.1	tcattagcaaTtccgccatct	0.841212	0.729897	7.58182	6.61038	strong	1	-0.971439	-0.108328
chr12	22592724	chr12:22592724:G:C	G	C	SNV	CTCF	jaspar2022	MA1930.1	MA1930.1	tgggataacttaaaaaaaataactgatagagggCgatagagagaaagaaagcagctgagaaaagggga	0.54374	0.575654	9.19406	9.688	weak	1	0.493939	0.0303853
chr19	12933730	chr19:12933730:C:A	C	A	SNV	NR2F1	jaspar2022	MA1537.1	MA1537.1	agcgtgtccgggccAgggtgggcgggggg	0.560489	0.614265	10.4443	11.4407	strong	1	0.996446	0.0536065
chr6	5261227	chr6:5261227:A:C	A	C	SNV	CTCF	jaspar2022	MA1929.1	MA1929.1	catttgtgtttcgggggcagcgccccttcctacCtccaggaggccgcgttgcccgggttaccgaagg	0.745787	0.85521	10.3544	11.7537	strong	1	1.39925	0.102847
chr17	79145226	chr17:79145226:C:T	C	T	SNV	NR2F1	jaspar2022	MA1538.1	MA1538.1	caggagcctgcgcaTgtcctatccgagtg	0.507607	0.560427	8.36017	9.21344	strong	1	0.853265	0.0523015
chr11	74674101	chr11:74674101:C:T	C	T	SNV	NR2F2	jaspar2022	MA1111.1	MA1111.1	ccactcaacaCctgtgaaaag	0.640283	0.559296	6.68504	5.85689	strong	1	-0.828147	-0.0799111
chr5	180313827	chr5:180313827:T:C	T	C	SNV	SOX8	jaspar2022	MA0868.2	MA0868.2	ccacgccgaTctccggccc	0.483257	0.39528	4.44214	3.66209	strong	1	-0.780042	-0.086443
chr12	98726055	chr12:98726055:T:G	T	G	SNV	CTCF	jaspar2022	MA0139.1	MA0139.1	ttcacatttccgtcattgGggggcagcgaagggctcc	0.61651	0.756284	8.58257	10.4686	strong	1	1.88604	0.137095
chr3	125916672	chr3:125916672:C:G	C	G	SNV	NR2F1	jaspar2022	MA1537.1	MA1537.1	tgctgcagagtttgGagcgccgctttctg	0.486808	0.527614	9.07905	9.83516	strong	1	0.756111	0.0406771
chr16	1964833	chr16:1964833:A:G	A	G	SNV	NFIC	jaspar2022	MA1527.1	MA1527.1	ggaaaagaagaacgagGcctactgggaagcagc	0.504435	0.620181	8.73599	10.7138	strong	1	1.97779	0.114962
chr8	23084374	chr8:23084374:G:A	G	A	SNV	CTCF	jaspar2022	MA1930.1	MA1930.1	cgcgcggcttcccagccagccgccctggaggacGtggaggggaggcagccacagtcctggagaggcct	0.656275	0.620452	10.9358	10.3814	weak	1	-0.554447	-0.0341075
chr6	2744320	chr6:2744320:A:G	A	G	SNV	SP1	jaspar2022	MA0079.5	MA0079.5	cgctgtgaGtgcgtatt	0.484885	0.517182	6.44517	6.87168	weak	1	0.426513	0.0321953
chr2	231017308	chr2:231017308:G:A	G	A	SNV	SOX8	jaspar2022	MA0868.2	MA0868.2	ttgccttccAtggtatcag	0.598932	0.716781	5.46775	6.51265	strong	1	1.0449	0.115794
chr11	73242795	chr11:73242795:T:C	T	C	SNV	CTCF	jaspar2022	MA1929.1	MA1929.1	ccccaggttggttggtgctgctctgcttcccccTggtggccaaagctggcagcagtggcaggaaacg	0.722087	0.677779	10.0514	9.48478	weak	1	-0.566576	-0.0416442
chr7	36152824	chr7:36152824:T:C	T	C	SNV	SP1	jaspar2022	MA0079.5	MA0079.5	cgcgctcaCggccccgc	0.711907	0.818986	9.44319	10.8572	strong	1	1.41406	0.10674
chr1	25803140	chr1:25803140:C:T	C	T	SNV	CTCF	jaspar2022	MA1930.1	MA1930.1	catgaaagcagatgggcagataaacaggtcgtcCccttgtggccttgcctgtacttcttgttttgcat	0.686401	0.594853	11.4021	9.98516	strong	1	-1.41694	-0.0871652
chr4	67988596	chr4:67988596:C:T	C	T	SNV	CTCF	jaspar2022	MA0139.1	MA0139.1	acacggaccagcagatggCagcacactgtaacacatt	0.928641	0.870594	12.7943	12.0111	strong	1	-0.783266	-0.056935
chr2	107627392	chr2:107627392:T:G	T	G	SNV	CTCF	jaspar2022	MA1929.1	MA1929.1	tttaagagctacagagataatgctccacctgctGgagggtcgagtatgtacatggatcatttgatat	0.723108	0.832532	10.0644	11.4637	strong	1	1.39925	0.102847
chr20	36605769	chr20:36605769:C:T	C	T	SNV	SP1	jaspar2022	MA0079.5	MA0079.5	cttcgcggCgcctgctc	0.672334	0.575488	8.92059	7.64165	strong	1	-1.27893	-0.0965403
chr9	39588682	chr9:39588682:C:T	C	T	SNV	NEUROD1	jaspar2022	MA1109.1	MA1109.1	cacacccagccaCgcctgcagatgt	0.648356	0.571788	7.22742	6.39109	strong	1	-0.836338	-0.075561
chr2	85561615	chr2:85561615:C:A	C	A	SNV	CTCF	jaspar2022	MA0139.1	MA0139.1	ttgcttggcggcagggggCggaacaaggagccttgga	0.833499	0.778676	11.5105	10.7708	strong	1	-0.739752	-0.0537719
chr1	38186109	chr1:38186109:G:T	G	T	SNV	NFIC	jaspar2022	MA0161.2	MA0161.2	tgggttgttgGcaggttgcca	0.86976	0.714612	8.49947	7.01604	strong	1	-1.48343	-0.152229
chr3	128950809	chr3:128950809:C:T	C	T	SNV	CTCF	jaspar2022	MA0139.1	MA0139.1	tcacatagcaccccctgcTtagcatgtatgaaaatct	0.644072	0.70278	8.95447	9.74665	strong	1	0.792178	0.0575828
chr19	56839696	chr19:56839696:A:G	A	G	SNV	ZNF384	jaspar2022	MA1125.1	MA1125.1	gtggggctggaAcagaccattac	0.638265	0.482516	7.97944	6.07088	strong	1	-1.90856	-0.153765
chr19	38256477	chr19:38256477:A:G	A	G	SNV	CTCF	jaspar2022	MA0139.1	MA0139.1	ccccaccccggccgcctcGggcctcagtttccccgtc	0.724053	0.754891	10.0337	10.4498	weak	1	0.416114	0.030247
chr21	41943948	chr21:41943948:G:A	G	A	SNV	SP1	jaspar2022	MA0079.5	MA0079.5	agggccacGctctgagc	0.623345	0.560593	8.27365	7.44495	strong	1	-0.828693	-0.0625538
chr2	32165765	chr2:32165765:A:C	A	C	SNV	FOXK2	jaspar2022	MA1103.2	MA1103.2	aaggggacggAagccggaggc	0.49561	0.373623	4.53678	3.47134	strong	1	-1.06544	-0.119148
chr19	55166749	chr19:55166749:C:T	C	T	SNV	SP1	jaspar2022	MA0079.5	MA0079.5	ccttccccCacacctag	0.789684	0.664987	10.4703	8.82356	strong	1	-1.64673	-0.124303
chr21	9008602	chr21:9008602:T:C	T	C	SNV	FOXK2	jaspar2022	MA1103.2	MA1103.2	gggctgcagaCagagctcagg	0.601324	0.707938	5.46009	6.39125	strong	1	0.931165	0.104132
chr3	197627986	chr3:197627986:C:A	C	A	SNV	NR2F2	jaspar2022	MA1111.1	MA1111.1	gtctaaggggAggggacgccg	0.552465	0.708859	5.78704	7.38626	strong	1	1.59923	0.154315
chr11	18412293	chr11:18412293:C:T	C	T	SNV	SOX8	jaspar2022	MA0868.2	MA0868.2	gcataagagTcgagcgggg	0.495344	0.613193	4.5493	5.5942	strong	1	1.0449	0.115794
chr9	95743825	chr9:95743825:C:G	C	G	SNV	NFIC	jaspar2022	MA1527.1	MA1527.1	cttctgtttccatttgGccctatgccagacctc	0.880108	0.99569	15.1552	17.1302	strong	1	1.97499	0.114799
chr2	197453301	chr2:197453301:A:C	A	C	SNV	SRF	jaspar2022	MA0083.3	MA0083.3	gcgcgagcgcacgggAaaagcgattggtcgg	0.442042	0.37343	8.56729	7.26763	strong	1	-1.29967	-0.0679168
chr19	53554523	chr19:53554523:C:G	C	G	SNV	CTCF	jaspar2022	MA1929.1	MA1929.1	ggggtgcgcatgcgcgctggcctccatgggtggGgggaccgactgtgtgacgcacttgcgtgggagt	0.673517	0.729732	9.43028	10.1491	strong	1	0.718856	0.052837
chr15	55196906	chr15:55196906:A:G	A	G	SNV	NR2F1	jaspar2022	MA1538.1	MA1538.1	ttgaacccgcgtgtGaccccaccaaacaa	0.539778	0.643824	8.87987	10.5606	strong	1	1.68076	0.103024
chr16	76898035	chr16:76898035:T:A	T	A	SNV	TBR1	jaspar2022	MA0802.1	MA0802.1	ctatgattcAccaagtgca	0.492464	0.552003	5.59612	6.25265	weak	1	0.656521	0.0586569
chr1	33974404	chr1:33974404:A:G	A	G	SNV	CLOCK	jaspar2022	MA0819.2	MA0819.2	gccaggcatGgggccaagc	0.570922	0.688576	5.58934	6.72908	strong	1	1.13974	0.116946
chr11	66002932	chr11:66002932:T:C	T	C	SNV	CTCF	jaspar2022	MA1929.1	MA1929.1	gtcttggttcagccaaggtcacagagggagtgaCagcttccgcgcagccctggctacggactctggg	0.576678	0.636764	8.19196	8.96031	strong	1	0.768346	0.0564746
chr4	7322869	chr4:7322869:C:A	C	A	SNV	SP1	jaspar2022	MA0079.5	MA0079.5	accagctgCggctcctc	0.682806	0.598354	9.05887	7.94362	strong	1	-1.11526	-0.0841852
chr11	1473136	chr11:1473136:T:C	T	C	SNV	NR2F1	jaspar2022	MA1538.1	MA1538.1	tctcatgtgtgcccTgtgcggggctgact	0.543954	0.516511	8.94732	8.504	weak	1	-0.443322	-0.0271737
chr10	124567617	chr10:124567617:G:C	G	C	SNV	CTCF	jaspar2022	MA1930.1	MA1930.1	ccacagggcaacgctctggcttgacaaggggcgCcactgctggtcagcagcccagccagccgcagcgg	0.629706	0.728955	10.5246	12.0607	strong	1	1.53614	0.0944977
chr2	159921990	chr2:159921990:C:G	C	G	SNV	CTCF	jaspar2022	MA1929.1	MA1929.1	ccgagggtgcagcatcagccatggcgagctcccCctgcaggcagcatcgtggtggcattcgcaccaa	0.736412	0.694504	10.2345	9.69865	weak	1	-0.535897	-0.0393892
chr10	133097125	chr10:133097125:G:A	G	A	SNV	CTCF	jaspar2022	MA0139.1	MA0139.1	cctggcatgggcaagggcGccccctgtgcccaagaaa	0.679698	0.638656	9.43519	8.88139	weak	1	-0.553804	-0.0402556
chr19	588261	chr19:588261:C:G	C	G	SNV	NFIC	jaspar2022	MA1527.1	MA1527.1	gacttgcgggttctgcCggcgcctgcaggaggc	0.551608	0.518304	9.54205	8.97297	weak	1	-0.569081	-0.0330787
chr10	106643604	chr10:106643604:C:G	C	G	SNV	SP1	jaspar2022	MA0079.5	MA0079.5	ggaggcagGagatttca	0.604064	0.668826	8.01903	8.87427	strong	1	0.855233	0.0645572
chr14	101707582	chr14:101707582:A:G	A	G	SNV	SP1	jaspar2022	MA0079.5	MA0079.5	cttgtgtcGgctcaagt	0.482612	0.587882	6.41515	7.80533	strong	1	1.39018	0.104938
chr17	48047829	chr17:48047829:C:T	C	T	SNV	NFIC	jaspar2022	MA1527.1	MA1527.1	acccaagatggcggcaTgagcgtcgcaaccaca	0.586468	0.619945	10.1377	10.7097	weak	1	0.572036	0.0332504
chr12	124740785	chr12:124740785:A:G	A	G	SNV	NR2F2	jaspar2022	MA1111.1	MA1111.1	acaagagggcAgagagaagcc	0.761477	0.607098	7.92431	6.3457	strong	1	-1.57861	-0.152327
chr9	40992231	chr9:40992231:A:G	A	G	SNV	CTCF	jaspar2022	MA0139.1	MA0139.1	cagccgccatagctccccAgcagaaacccggaagtgg	0.680215	0.621507	9.44217	8.64999	strong	1	-0.792178	-0.0575828
chr19	15780870	chr19:15780870:A:T	A	T	SNV	ZNF24	jaspar2022	MA1124.1	MA1124.1	agtcctgcctccAggcagcccaggg	0.54476	0.440624	8.69934	7.10225	strong	1	-1.59709	-0.101848
chr9	127360419	chr9:127360419:C:T	C	T	SNV	CTCF	jaspar2022	MA1930.1	MA1930.1	gtgtacagccctcccgtggtagaatggcggctgTacagctcccagcaggcacggtgcagtgcacagct	0.771078	0.81173	12.7127	13.3419	weak	1	0.629195	0.0387058
chr10	70670604	chr10:70670604:T:C	T	C	SNV	SP1	jaspar2022	MA0079.5	MA0079.5	aaaagcaaCcattgtag	0.310914	0.458477	4.14775	6.09644	strong	1	1.94869	0.147097
chr14	100900995	chr14:100900995:G:A	G	A	SNV	CTCF	jaspar2022	MA1930.1	MA1930.1	ccgaagggcttgcagtgcctaactgagctgccaAggccgtctgtctgtctgttagccaggaaggcaaa	0.549304	0.606648	9.28018	10.1677	strong	1	0.887545	0.0545985
chrX	119871742	chrX:119871742:C:G	C	G	SNV	EGR1	jaspar2022	MA0162.4	MA0162.4	ggactgcgagagcGcgagcgcccgtct	0.66753	0.806322	6.95242	8.33394	strong	1	1.38152	0.134628
chr21	39386047	chr21:39386047:T:G	T	G	SNV	MAZ	jaspar2022	MA1522.1	MA1522.1	gcccttcctcTcaatccgagc	0.697661	0.578869	9.36247	7.78248	strong	1	-1.57999	-0.118053
chr6	39411636	chr6:39411636:G:A	G	A	SNV	SP1	jaspar2022	MA0079.5	MA0079.5	tgagtcagGttggcaat	0.566862	0.451147	7.52775	5.99964	strong	1	-1.52811	-0.115349
chr7	37505037	chr7:37505037:A:T	A	T	SNV	OLIG2	jaspar2022	MA0678.1	MA0678.1	cctctattaTtttcagagg	0.494497	0.564688	5.69218	6.48993	strong	1	0.797748	0.0697489
chr19	49085298	chr19:49085298:C:T	C	T	SNV	SRF	jaspar2022	MA0083.3	MA0083.3	cccgcggctgaggtaTtcaaggtgcccaaag	0.43033	0.485403	8.34543	9.38863	strong	1	1.0432	0.0545147
chr6	44010138	chr6:44010138:C:T	C	T	SNV	NFIC	jaspar2022	MA1527.1	MA1527.1	gagtctgtgagactggCgctatgccagacccca	0.972233	0.875472	16.7294	15.076	strong	1	-1.65339	-0.0961059
chr3	127062656	chr3:127062656:G:T	G	T	SNV	NFIC	jaspar2022	MA1527.1	MA1527.1	cactgcactccagcctTggcacagagccagact	0.85731	0.974095	14.7657	16.7612	strong	1	1.99554	0.115994
chr10	124484373	chr10:124484373:T:C	T	C	SNV	NR2F1	jaspar2022	MA1537.1	MA1537.1	gtgaaagctcccctTtcccagggtggggg	0.593565	0.544784	11.0572	10.1533	strong	1	-0.903886	-0.048627
chr12	131622172	chr12:131622172:T:C	T	C	SNV	NR3C1	jaspar2022	MA0113.3	MA0113.3	agagagctacacaaggTggccttgtttggggaa	0.695711	0.601751	12.0023	10.3978	strong	1	-1.60454	-0.0932944
chr1	43389907	chr1:43389907:G:C	G	C	SNV	CTCF	jaspar2022	MA0139.1	MA0139.1	gctgggtgccgaggtagcCaggtcaggggtcaagagt	0.579783	0.623187	8.08698	8.67267	weak	1	0.585682	0.0425727
chr19	53538188	chr19:53538188:C:T	C	T	SNV	OLIG2	jaspar2022	MA0678.1	MA0678.1	ccctgtcccCgtaactgtg	0.521302	0.482859	5.99682	5.5599	weak	1	-0.436918	-0.0382008
chr1	36982986	chr1:36982986:C:G	C	G	SNV	CTCF	jaspar2022	MA0139.1	MA0139.1	tcaagagcgagccctggcGgagcccagcccacctgct	0.574567	0.713479	8.0166	9.89102	strong	1	1.87442	0.13625
chr9	40992231	chr9:40992231:A:G	A	G	SNV	PKNOX1	jaspar2022	MA0782.2	MA0782.2	cgccatagctccccGgcagaaacccggaa	0.468275	0.513576	5.2278	5.70336	weak	1	0.475563	0.043994
chr19	29500096	chr19:29500096:C:T	C	T	SNV	ZNF24	jaspar2022	MA1124.1	MA1124.1	ccccagccctccTtgctccaacctc	0.480125	0.550333	7.70806	8.78481	strong	1	1.07676	0.0686657
chr16	26345116	chr16:26345116:A:G	A	G	SNV	MEF2A	jaspar2022	MA0052.4	MA0052.4	gggtgagcaggcatAaatacgttggagga	0.785783	0.661993	8.30198	7.04202	strong	1	-1.25996	-0.120199
chr12	1340033	chr12:1340033:T:C	T	C	SNV	NEUROD1	jaspar2022	MA1109.1	MA1109.1	tgggggaagctgCaatgtgtggaga	0.642021	0.698152	7.15823	7.77134	weak	1	0.613113	0.0553932
chr3	53806045	chr3:53806045:G:C	G	C	SNV	NR2F1	jaspar2022	MA1538.1	MA1538.1	tcctcctccctcatCttccctcctcctcc	0.50736	0.532172	8.35618	8.757	weak	1	0.400818	0.0245684
chr6	53294292	chr6:53294292:G:T	G	T	SNV	CTCF	jaspar2022	MA1930.1	MA1930.1	tcctaaccccctctggtggctggttcaggcaggTgcatgtgaagcaattgtggccagtgagttttgag	0.846655	0.887929	13.8824	14.5213	weak	1	0.638817	0.0392977
chr6	66631146	chr6:66631146:C:T	C	T	SNV	NR2F1	jaspar2022	MA1538.1	MA1538.1	gacgggcttaaaaaCggcacaccaggaga	0.513839	0.459357	8.46085	7.58073	strong	1	-0.880115	-0.0539472
chr4	82739534	chr4:82739534:C:T	C	T	SNV	CTCF	jaspar2022	MA1929.1	MA1929.1	ctggagggaggtcgtggctggtagagccacactCcgcctgctggttgtgtgcggtggtggcccaggc	0.727987	0.686575	10.1268	9.59726	weak	1	-0.529554	-0.038923
chr8	28633901	chr8:28633901:C:T	C	T	SNV	CTCF	jaspar2022	MA0139.1	MA0139.1	aacaagacctccaggggcCgctacagaacagaaactc	0.853093	0.795046	11.7749	10.9916	strong	1	-0.783266	-0.056935
chr2	70108938	chr2:70108938:T:G	T	G	SNV	BHLHE41	jaspar2022	MA0636.1	MA0636.1	ggtgtgtggTggggtatgt	0.516224	0.459799	7.45476	6.64224	strong	1	-0.812518	-0.0563423
chr3	195271242	chr3:195271242:G:A	G	A	SNV	NEUROD1	jaspar2022	MA1109.1	MA1109.1	gccgaaaccgctGggtcctaggttc	0.728779	0.567482	8.10588	6.34405	strong	1	-1.76183	-0.159177
chr5	33470746	chr5:33470746:C:G	C	G	SNV	CTCF	jaspar2022	MA0139.1	MA0139.1	aatggccatatgaatcacCaggagatggcgttaaaat	0.924693	0.785781	12.7411	10.8666	strong	1	-1.87442	-0.13625
chr22	23816386	chr22:23816386:G:A	G	A	SNV	SRF	jaspar2022	MA0083.3	MA0083.3	cctctgtgccatcacAtctgccaccagttca	0.42742	0.52724	8.29031	10.1811	strong	1	1.8908	0.0988076
chr1	181985441	chr1:181985441:G:A	G	A	SNV	RELB	jaspar2022	MA1117.1	MA1117.1	acatgtgctcGtgcaatgaga	0.709659	0.55633	6.43377	5.09568	strong	1	-1.33809	-0.149215
chr21	26930239	chr21:26930239:T:G	T	G	SNV	NFIC	jaspar2022	MA0161.2	MA0161.2	aaaatccttgGcatattgcca	0.84396	0.999108	8.25278	9.73621	strong	1	1.48343	0.152229
chr6	109009656	chr6:109009656:C:T	C	T	SNV	RELB	jaspar2022	MA1117.1	MA1117.1	ggctcgcgtcCccgcaaagca	0.768545	0.617969	6.94767	5.6336	strong	1	-1.31407	-0.146536
chr7	66014154	chr7:66014154:C:A	C	A	SNV	CTCF	jaspar2022	MA0139.1	MA0139.1	cagtgaagaagcctgcctCtccctctactggctgttg	0.87908	0.846949	12.1256	11.692	weak	1	-0.433565	-0.0315155
chr7	26681994	chr7:26681994:C:T	C	T	SNV	CTCF	jaspar2022	MA0139.1	MA0139.1	tgcaccactcattctgagCcactagatggcgtaaaaa	0.932304	0.853399	12.8438	11.779	strong	1	-1.06471	-0.0773926
chr19	57351137	chr19:57351137:G:A	G	A	SNV	PKNOX1	jaspar2022	MA0782.2	MA0782.2	tggttggatgcaggAtacaaactacgtta	0.484626	0.535098	5.39945	5.92929	weak	1	0.529845	0.0490155
chr21	45556322	chr21:45556322:T:C	T	C	SNV	CTCF	jaspar2022	MA1930.1	MA1930.1	accgggcggacccaagactgcaagctcaagcccTggcggcagggcagcggggcctgtgagggccgagg	0.65268	0.621554	10.8802	10.3984	weak	1	-0.481763	-0.0296363
chr8	143471308	chr8:143471308:T:C	T	C	SNV	CTCF	jaspar2022	MA0139.1	MA0139.1	gcagccagcggcagagggCgccccagaagaggcagtg	0.774101	0.812805	10.709	11.2313	weak	1	0.522242	0.0379614
chrX	53048565	chrX:53048565:C:A	C	A	SNV	MAZ	jaspar2022	MA1522.1	MA1522.1	cagcttagggAcccggactcc	0.568398	0.607263	7.64321	8.16013	weak	1	0.516916	0.0386228
chr13	26660413	chr13:26660413:A:G	A	G	SNV	NFIC	jaspar2022	MA1527.1	MA1527.1	tggtcagcactgggccAtgccagagagaggccg	0.734103	0.637709	12.6604	11.0133	strong	1	-1.64712	-0.0957411
chr2	90392334	chr2:90392334:T:C	T	C	SNV	CTCF	jaspar2022	MA0139.1	MA0139.1	cacgaatggaatcatcatCgaatggaatcgaatagaa	0.524736	0.660798	7.34421	9.18017	strong	1	1.83596	0.133455
chr20	37615989	chr20:37615989:G:A	G	A	SNV	CTCF	jaspar2022	MA0139.1	MA0139.1	caggttggtaattccctgAgcactatgtctgtaattc	0.444355	0.505646	6.25958	7.08661	strong	1	0.827032	0.0601163
chr3	66677096	chr3:66677096:T:C	T	C	SNV	NR3C1	jaspar2022	MA0113.3	MA0113.3	ccttcacctactgggcCcaagtgatcctttcac	0.622253	0.649431	10.7479	11.212	weak	1	0.464107	0.0269851
chr2	216013634	chr2:216013634:C:T	C	T	SNV	CTCF	jaspar2022	MA1930.1	MA1930.1	gcatgcgtccacgagacgccccgctaccgccctCtaagggtgaagcagggactccagccagtcctcaa	0.625006	0.598892	10.4518	10.0477	weak	1	-0.404184	-0.0248639
chr3	57100218	chr3:57100218:C:T	C	T	SNV	BHLHE41	jaspar2022	MA0636.1	MA0636.1	ttttcagcaCgtgctgatc	0.873848	0.736397	12.6045	10.6252	strong	1	-1.97928	-0.137249
chr19	43827291	chr19:43827291:C:T	C	T	SNV	SP4	jaspar2022	MA0685.2	MA0685.2	ggcacaggCcttttagg	0.633139	0.483652	8.27125	6.32252	strong	1	-1.94873	-0.149286
chr2	197453301	chr2:197453301:A:C	A	C	SNV	CTCF	jaspar2022	MA1930.1	MA1930.1	ctgagtattacgcaaattgcgcgagcgcacgggCaaagcgattggtcggtcaggagagagaggtgtgt	0.627443	0.686845	10.4896	11.409	strong	1	0.919397	0.0565579
chr12	124914621	chr12:124914621:T:C	T	C	SNV	CLOCK	jaspar2022	MA0819.2	MA0819.2	aacaagaacTgcgacccaa	0.581022	0.503061	5.68719	4.93196	strong	1	-0.755228	-0.0774919
chrX	112841510	chrX:112841510:C:G	C	G	SNV	SP1	jaspar2022	MA0079.5	MA0079.5	gcgggcggGgctccgcg	0.845447	0.877987	11.2067	11.6364	weak	1	0.429707	0.0324364
chr4	85784511	chr4:85784511:C:T	C	T	SNV	SP1	jaspar2022	MA0079.5	MA0079.5	tccccttcCtccagatg	0.690537	0.567662	9.16097	7.53831	strong	1	-1.62266	-0.122487
chr12	68808017	chr12:68808017:C:G	C	G	SNV	NFIC	jaspar2022	MA0161.2	MA0161.2	ccccgcctcaCagcccgccgc	0.533576	0.475326	5.28508	4.72813	weak	1	-0.556949	-0.0571538
chr20	63530360	chr20:63530360:C:T	C	T	SNV	NR2F1	jaspar2022	MA0017.2	MA0017.2	ctgacccacgcaTggccgctgcagc	0.597303	0.757787	7.26889	9.17597	strong	1	1.90708	0.158208
chr10	97445929	chr10:97445929:A:G	A	G	SNV	ZNF143	jaspar2022	MA0088.2	MA0088.2	cagcccctatccaggGctctgtacgggaagc	0.626612	0.652954	12.2412	12.7534	weak	1	0.51221	0.026265
chr7	117083842	chr7:117083842:G:A	G	A	SNV	NEUROD1	jaspar2022	MA1109.1	MA1109.1	tgtgagcatatgGaggcagcactaa	0.848166	0.75584	9.40992	8.40146	strong	1	-1.00846	-0.0911117
chr3	52190671	chr3:52190671:T:G	T	G	SNV	NR2F1	jaspar2022	MA1537.1	MA1537.1	gaagggccaggaggTcagccactctcccc	0.593469	0.528561	11.0554	9.85272	strong	1	-1.20269	-0.0647023
chr6	68572664	chr6:68572664:G:C	G	C	SNV	CTCF	jaspar2022	MA1930.1	MA1930.1	cctatgtggtagctttctcagatgctgcttgtcCtagtgatgtatttttgttggtggtgcagttcagg	0.569783	0.66574	9.59713	11.0823	strong	1	1.48518	0.0913631
chr7	71705401	chr7:71705401:T:G	T	G	SNV	TBR1	jaspar2022	MA0802.1	MA0802.1	aaaccccggGtcattgctg	0.499964	0.602007	5.67883	6.80402	strong	1	1.1252	0.100531
chrX	101098121	chrX:101098121:T:C	T	C	SNV	SP1	jaspar2022	MA0079.5	MA0079.5	tgagtgcgCtgctccgc	0.625365	0.693634	8.30032	9.20187	strong	1	0.901556	0.0680539
chr1	182144497	chr1:182144497:C:T	C	T	SNV	NR3C1	jaspar2022	MA0113.3	MA0113.3	gaaacaggcctgggagTcagggggagtggagga	0.430207	0.498971	7.46834	8.64261	strong	1	1.17427	0.0682767
chr21	33324959	chr21:33324959:T:C	T	C	SNV	SRF	jaspar2022	MA0083.3	MA0083.3	gaggggcagcgcgtgCgcagaggggcggtgt	0.451341	0.54579	8.74342	10.5325	strong	1	1.78906	0.093491
chr19	47267681	chr19:47267681:C:A	C	A	SNV	RELB	jaspar2022	MA1117.1	MA1117.1	agctctgcccCctccagtgga	0.720814	0.640533	6.53112	5.83051	strong	1	-0.700604	-0.0781266
chr15	35850561	chr15:35850561:G:A	G	A	SNV	MEF2A	jaspar2022	MA0052.4	MA0052.4	acgtaagtcctacaAgtatccctggaaat	0.61006	0.730466	6.51343	7.73895	strong	1	1.22552	0.116913
chr2	197453301	chr2:197453301:A:C	A	C	SNV	ZNF384	jaspar2022	MA1125.1	MA1125.1	gagcgcacgggAaaagcgattgg	0.646715	0.499842	8.083	6.28318	strong	1	-1.79981	-0.145004
chr19	17511573	chr19:17511573:A:G	A	G	SNV	EGR1	jaspar2022	MA0162.4	MA0162.4	gccaaagacaatcGcccaaagtactcg	0.649406	0.693907	6.77202	7.21497	weak	1	0.442955	0.0431655
chr17	39447164	chr17:39447164:G:A	G	A	SNV	NR2F1	jaspar2022	MA1538.1	MA1538.1	ggaggcgaaggcagGtggatcacctgagg	0.758754	0.664904	12.4172	10.9012	strong	1	-1.51606	-0.0929278
chr7	78062422	chr7:78062422:G:A	G	A	SNV	NFIC	jaspar2022	MA1527.1	MA1527.1	gcctggcattgcgccaAtcctctccactccttt	0.972673	0.997174	16.7369	17.1556	weak	1	0.418659	0.0243352
chrX	131763828	chrX:131763828:G:A	G	A	SNV	NEUROD1	jaspar2022	MA1109.1	MA1109.1	ggacattgacatGgcttaggcatag	0.670119	0.508821	7.46514	5.70331	strong	1	-1.76183	-0.159177
chr2	129698741	chr2:129698741:C:T	C	T	SNV	NFIC	jaspar2022	MA1527.1	MA1527.1	gctgtcaccccaacccTggcacacagccagctc	0.856769	0.973554	14.7564	16.752	strong	1	1.99554	0.115994
chr20	47205863	chr20:47205863:A:G	A	G	SNV	CTCF	jaspar2022	MA1930.1	MA1930.1	cacaggctgcagttttgcctatggccaccagatGgcgagcttgctggactgcatgaaaaggtctgagc	0.767241	0.880427	12.6533	14.4051	strong	1	1.75184	0.107767
chrX	149540994	chrX:149540994:C:T	C	T	SNV	CLOCK	jaspar2022	MA0819.2	MA0819.2	aagggatgaCgggagctgt	0.628329	0.543993	6.14546	5.32848	strong	1	-0.816983	-0.0838283
chr16	2905294	chr16:2905294:C:T	C	T	SNV	MEF2A	jaspar2022	MA0052.4	MA0052.4	cacggtgctggggcTgctctggccgccgc	0.363861	0.436628	4.00757	4.7482	strong	1	0.740631	0.0706552
chr3	49067703	chr3:49067703:A:G	A	G	SNV	NFIC	jaspar2022	MA1527.1	MA1527.1	aatctggcaaaaggccAggcgcggtggctcagg	0.971009	0.855866	16.7085	14.741	strong	1	-1.96749	-0.114363
chr20	54680981	chr20:54680981:T:C	T	C	SNV	CTCF	jaspar2022	MA0139.1	MA0139.1	tcaggtttgggtttaattCtgtcttttgcgttgtttc	0.529685	0.600157	7.41099	8.36191	strong	1	0.950917	0.0691214
chr9	40992190	chr9:40992190:C:T	C	T	SNV	SP4	jaspar2022	MA0685.2	MA0685.2	cagatgcgCgcagacac	0.689832	0.627589	9.0103	8.19889	strong	1	-0.811413	-0.0621596
chr14	103613705	chr14:103613705:G:C	G	C	SNV	CTCF	jaspar2022	MA1930.1	MA1930.1	aggaacatcaatgtcctggtagacacactggggGcgctgttctacaataaaagaagtgaaaaaacatg	0.612774	0.543083	10.2625	9.18388	strong	1	-1.07865	-0.0663547
chr10	23790934	chr10:23790934:C:G	C	G	SNV	NFIC	jaspar2022	MA1527.1	MA1527.1	tagagtcagggttttgGcacgttgccagggtgg	0.881517	0.997099	15.1793	17.1543	strong	1	1.97499	0.114799
chr2	177552414	chr2:177552414:C:T	C	T	SNV	OLIG2	jaspar2022	MA0678.1	MA0678.1	gcttgcaggTggaggaccc	0.491506	0.570483	5.65818	6.55579	strong	1	0.897609	0.07848
chr9	40992220	chr9:40992220:C:T	C	T	SNV	SP4	jaspar2022	MA0685.2	MA0685.2	gcagccgcCatagctcc	0.629918	0.480431	8.22926	6.28053	strong	1	-1.94873	-0.149286
chr12	124914604	chr12:124914604:G:A	G	A	SNV	SP4	jaspar2022	MA0685.2	MA0685.2	atcacagcGatccacaa	0.549843	0.4876	7.18539	6.37398	strong	1	-0.811413	-0.0621596
chr12	80413657	chr12:80413657:C:T	C	T	SNV	CTCF	jaspar2022	MA0139.1	MA0139.1	tgaaggagtagaaattagCcagcaggtgacagtaggg	0.890438	0.811533	12.2788	11.2141	strong	1	-1.06471	-0.0773926
chr2	90392334	chr2:90392334:T:C	T	C	SNV	MITF	jaspar2022	MA0620.3	MA0620.3	acgaatggaatcatcatCgaatggaatcgaataga	0.527131	0.60462	6.06369	6.92368	strong	1	0.859988	0.0760267
chrX	71254216	chrX:71254216:C:T	C	T	SNV	FOXK2	jaspar2022	MA1103.2	MA1103.2	accccattggTtggctcgagg	0.46938	0.585587	4.30768	5.32264	strong	1	1.01496	0.113503
chr7	102467250	chr7:102467250:G:C	G	C	SNV	CTCF	jaspar2022	MA0139.1	MA0139.1	tccaggaggcttccagcaGgtggcgggattgagattc	0.949311	0.809072	13.0732	11.1809	strong	1	-1.89233	-0.137552
chr19	58387069	chr19:58387069:T:C	T	C	SNV	CREB1	jaspar2022	MA0018.4	MA0018.4	gggtagcggacaTccgccaggcacg	0.687169	0.566698	7.16049	5.94927	strong	1	-1.21123	-0.117529
chr19	48993574	chr19:48993574:A:G	A	G	SNV	ZNF143	jaspar2022	MA0088.2	MA0088.2	gtggggaggaggaggAgggtgggataaagag	0.682884	0.582875	13.3354	11.3907	strong	1	-1.94465	-0.0997172
chr11	68659291	chr11:68659291:G:T	G	T	SNV	SP1	jaspar2022	MA0079.5	MA0079.5	gcctgggaGgttccgga	0.726112	0.578549	9.63077	7.68208	strong	1	-1.94869	-0.147097
chr19	50329176	chr19:50329176:C:T	C	T	SNV	ZNF143	jaspar2022	MA0088.2	MA0088.2	ggaggagcgaggtagTgggggcgtggcttag	0.613579	0.6408	11.9878	12.5171	weak	1	0.529309	0.0271418
chr2	197884545	chr2:197884545:G:A	G	A	SNV	NFIC	jaspar2022	MA1527.1	MA1527.1	gtgattttggctgtcaGccaggaatctcagaca	0.960075	0.84329	16.5217	14.5261	strong	1	-1.99554	-0.115994
chr1	5394347	chr1:5394347:C:T	C	T	SNV	CTCF	jaspar2022	MA0139.1	MA0139.1	gcaccacagcctcgctgcTcttgcaccaaccctagta	0.556059	0.625446	7.76687	8.70315	strong	1	0.936278	0.0680573
chr8	4692936	chr8:4692936:A:G	A	G	SNV	NFIC	jaspar2022	MA1527.1	MA1527.1	cagttttgcctcattgGcagtgggccaatcccc	0.883429	0.996419	15.212	17.1427	strong	1	1.93071	0.112226
chr1	121750216	chr1:121750216:G:A	G	A	SNV	TBR1	jaspar2022	MA0802.1	MA0802.1	gaggtcaacGgtagaatag	0.54676	0.508913	6.19483	5.7775	weak	1	-0.417333	-0.0372867
chr17	81356193	chr17:81356193:C:T	C	T	SNV	NR2F1	jaspar2022	MA1537.1	MA1537.1	cttggtggtgcatgCctgtaatcctagct	0.587605	0.491513	10.9467	9.16623	strong	1	-1.78052	-0.0957879
chr19	17591144	chr19:17591144:C:T	C	T	SNV	NFIC	jaspar2022	MA1527.1	MA1527.1	tgagcttggctgtgtgCcaataaaactttattt	0.998299	0.885308	17.1748	15.2441	strong	1	-1.93071	-0.112226
chr15	44296238	chr15:44296238:A:C	A	C	SNV	NFIC	jaspar2022	MA0161.2	MA0161.2	ggattcttgcCaactgtagct	0.703596	0.869668	6.91071	8.49859	strong	1	1.58788	0.162947
chr6	345452	chr6:345452:C:T	C	T	SNV	NR2F1	jaspar2022	MA0017.2	MA0017.2	cctcaagtgatcTgcctgcctcagc	0.741915	0.777629	8.98736	9.41176	weak	1	0.4244	0.0352075
chr6	5744759	chr6:5744759:G:A	G	A	SNV	NFIC	jaspar2022	MA1527.1	MA1527.1	gggcagtcccgtgattGgcgcatagccaaggaa	0.964728	0.848982	16.6012	14.6234	strong	1	-1.97779	-0.114962
chr10	125896407	chr10:125896407:G:C	G	C	SNV	SP1	jaspar2022	MA0079.5	MA0079.5	gggcttcaGgagcagtg	0.671423	0.54941	8.90855	7.29727	strong	1	-1.61128	-0.121627
chr19	53520703	chr19:53520703:A:G	A	G	SNV	BHLHE41	jaspar2022	MA0636.1	MA0636.1	catggctccGttagggccg	0.414779	0.509578	5.99394	7.35905	strong	1	1.36511	0.0946606
chr2	50273223	chr2:50273223:A:G	A	G	SNV	NFIB	jaspar2022	MA1643.1	MA1643.1	ggaggaaaatttggcaatctGccaaaatgaaaactgcacaa	0.820653	0.917002	13.7651	15.338	strong	1	1.57285	0.0942227
chr7	98802187	chr7:98802187:A:C	A	C	SNV	NFIC	jaspar2022	MA0161.2	MA0161.2	tctgccctggCaacaagccaa	0.712367	0.855014	6.99457	8.35847	strong	1	1.3639	0.139963
chr7	127885446	chr7:127885446:A:G	A	G	SNV	TBR1	jaspar2022	MA0802.1	MA0802.1	acatggcttAgatgctgag	0.542558	0.450425	6.1485	5.13257	strong	1	-1.01592	-0.0907678
chr9	40992190	chr9:40992190:C:T	C	T	SNV	SP1	jaspar2022	MA0079.5	MA0079.5	cagatgcgCgcagacac	0.617422	0.554669	8.19543	7.36673	strong	1	-0.828693	-0.0625538
chr22	19144872	chr22:19144872:G:A	G	A	SNV	CTCF	jaspar2022	MA1930.1	MA1930.1	attcatgcttgtcaatgctgtgaacacgaggggGtgctgtggaggtggcggggaggatgctatagggc	0.81561	0.763145	13.4019	12.5899	strong	1	-0.812034	-0.0499533
chr1	89085986	chr1:89085986:G:C	G	C	SNV	CTCF	jaspar2022	MA0139.1	MA0139.1	atggtgtcaccactagagGgaggtgctgtcatatcac	0.906647	0.774931	12.4975	10.7202	strong	1	-1.77731	-0.129191
chr20	47205863	chr20:47205863:A:G	A	G	SNV	CLOCK	jaspar2022	MA0819.2	MA0819.2	ccaccagatGgcgagcttg	0.648709	0.724868	6.34288	7.08065	strong	1	0.73777	0.0757005
chr1	109761309	chr1:109761309:G:C	G	C	SNV	ZBTB7B	jaspar2022	MA0694.1	MA0694.1	cacccctccccCtccctgacact	0.660306	0.737672	8.2561	9.20411	strong	1	0.948005	0.0763377
chr18	12375614	chr18:12375614:T:C	T	C	SNV	NFIC	jaspar2022	MA1527.1	MA1527.1	tgcagtggcccgctctTggctcactgccagctc	0.996661	0.881518	17.1468	15.1793	strong	1	-1.96749	-0.114363
chr1	16913903	chr1:16913903:T:G	T	G	SNV	RELB	jaspar2022	MA1117.1	MA1117.1	gcgcctggctTgccgggcggt	0.599252	0.462591	5.47026	4.27762	strong	1	-1.19263	-0.132994
chr2	235621909	chr2:235621909:A:G	A	G	SNV	SOX8	jaspar2022	MA0868.2	MA0868.2	gacccccccAccccctcag	0.398116	0.310077	3.68724	2.90665	strong	1	-0.78059	-0.0865038
chrX	135052279	chrX:135052279:A:G	A	G	SNV	MEIS2	jaspar2022	MA0774.1	MA0774.1	tgtggtcActagtgc	0.706344	0.551965	7.21934	5.66714	strong	1	-1.5522	-0.152597
chr13	113647649	chr13:113647649:C:G	C	G	SNV	SP4	jaspar2022	MA0685.2	MA0685.2	ctgcgtccCaagtgagc	0.715041	0.679122	9.33893	8.87069	weak	1	-0.468235	-0.0358699
chr15	101480488	chr15:101480488:C:T	C	T	SNV	BHLHE41	jaspar2022	MA0636.1	MA0636.1	aaccctaggCtgctgatcc	0.533272	0.438222	7.70023	6.33152	strong	1	-1.36871	-0.0949103
chr3	52190671	chr3:52190671:T:G	T	G	SNV	NR2F1	jaspar2022	MA1538.1	MA1538.1	gaagggccaggaggTcagccactctcccc	0.791309	0.68447	12.9431	11.2172	strong	1	-1.72591	-0.105791
chr19	19901002	chr19:19901002:T:C	T	C	SNV	SP4	jaspar2022	MA0685.2	MA0685.2	tcctgtgcCcctacagg	0.602099	0.715041	7.86661	9.33893	strong	1	1.47232	0.11279
chr20	61414583	chr20:61414583:A:G	A	G	SNV	SOX8	jaspar2022	MA0868.2	MA0868.2	gcaatattaAtaatgctca	0.813384	0.633314	7.36916	5.77259	strong	1	-1.59657	-0.176929
chr16	78478643	chr16:78478643:T:G	T	G	SNV	CTCF	jaspar2022	MA1929.1	MA1929.1	ggaagctgcattaattattccaggccacaagggGgccgttgagttactggttcactgcactggctgg	0.655448	0.708856	9.19922	9.88217	weak	1	0.682949	0.0501978
chr12	108270803	chr12:108270803:C:G	C	G	SNV	NEUROD1	jaspar2022	MA1109.1	MA1109.1	tcaggacatatgGcttggcagtcag	0.775591	0.866267	8.61719	9.60764	strong	1	0.990442	0.0894839
chr8	33513239	chr8:33513239:G:A	G	A	SNV	CREB1	jaspar2022	MA0018.4	MA0018.4	gctcgggaaaatGacggagaggtgg	0.573606	0.454415	6.01871	4.82036	strong	1	-1.19836	-0.11628
chr13	31192535	chr13:31192535:T:C	T	C	SNV	SP1	jaspar2022	MA0079.5	MA0079.5	agttgagaCgtggccag	0.535043	0.597795	7.10754	7.93624	strong	1	0.828693	0.0625538
chr1	205813381	chr1:205813381:C:T	C	T	SNV	SP1	jaspar2022	MA0079.5	MA0079.5	gccggctcCatgcgcct	0.620421	0.576084	8.23504	7.64953	weak	1	-0.585507	-0.044197
chr12	109098215	chr12:109098215:G:T	G	T	SNV	OLIG2	jaspar2022	MA0678.1	MA0678.1	gaagccataTggcgcctcc	0.809941	0.926577	9.27733	10.6029	strong	1	1.32561	0.115901
chr19	12766150	chr19:12766150:G:C	G	C	SNV	ZEB1	jaspar2022	MA0103.3	MA0103.3	catcctccagGtggcgctgca	0.993106	0.814275	10.3715	8.5189	strong	1	-1.85262	-0.177404
chr3	134824935	chr3:134824935:A:G	A	G	SNV	NR2F2	jaspar2022	MA1111.1	MA1111.1	tcctgccaacGtctgactgca	0.617089	0.685328	6.44787	7.14565	weak	1	0.69778	0.0673315
chr10	86262519	chr10:86262519:C:A	C	A	SNV	NFIB	jaspar2022	MA1643.1	MA1643.1	caccatcttgggcatggatgCtggcagagggccaagagtgg	0.95103	0.920939	15.8935	15.4022	weak	1	-0.491229	-0.0294274
chr16	2090548	chr16:2090548:C:A	C	A	SNV	MAZ	jaspar2022	MA1522.1	MA1522.1	accaacagggActgggccacg	0.591021	0.733025	7.94411	9.83281	strong	1	1.8887	0.141119
chr1	109761309	chr1:109761309:G:C	G	C	SNV	CLOCK	jaspar2022	MA0819.2	MA0819.2	cccctccccGtccctgaca	0.638913	0.511783	6.24799	5.01645	strong	1	-1.23153	-0.126364
chr14	71852383	chr14:71852383:C:A	C	A	SNV	SP1	jaspar2022	MA0079.5	MA0079.5	aagtgttaCcacactta	0.565951	0.458872	7.51571	6.10166	strong	1	-1.41406	-0.10674
chr16	3432002	chr16:3432002:G:T	G	T	SNV	ZNF143	jaspar2022	MA0088.2	MA0088.2	gccgctgtagcgcaaTtcatctcgttgacac	0.480158	0.569002	9.39342	11.121	strong	1	1.72755	0.088585
chr19	52048768	chr19:52048768:C:T	C	T	SNV	NR2F2	jaspar2022	MA1111.1	MA1111.1	acttctgggcTcctcgcccaa	0.530673	0.591903	5.56421	6.19031	weak	1	0.626106	0.0604153
chr20	63696494	chr20:63696494:C:A	C	A	SNV	NR2F1	jaspar2022	MA1538.1	MA1538.1	ctggctggtgaggcAcctcccagaaccac	0.627965	0.705285	10.3045	11.5535	strong	1	1.24903	0.0765604
chr16	88737574	chr16:88737574:C:G	C	G	SNV	CTCF	jaspar2022	MA1930.1	MA1930.1	gcagtgtgcggtactcaccaggccgccgcaggaGggagctctggccggtcagctcgtgcacgatgcag	0.686775	0.791538	11.4079	13.0294	strong	1	1.62147	0.0997467
chr15	66701180	chr15:66701180:G:A	G	A	SNV	SP1	jaspar2022	MA0079.5	MA0079.5	gggggggaGgggggccc	0.960114	0.847267	12.7209	11.2307	strong	1	-1.49022	-0.11249
chr12	15179933	chr12:15179933:T:C	T	C	SNV	OLIG2	jaspar2022	MA0678.1	MA0678.1	cacatcatcTgggtcaggg	0.781779	0.676669	8.95725	7.76263	strong	1	-1.19462	-0.104448
chr20	50658954	chr20:50658954:G:T	G	T	SNV	ZEB1	jaspar2022	MA0103.3	MA0103.3	ggtggcagatGgagttagcaa	0.818354	0.665074	8.56116	6.97323	strong	1	-1.58793	-0.152058
chr7	71705401	chr7:71705401:T:G	T	G	SNV	CLOCK	jaspar2022	MA0819.2	MA0819.2	aaaccccggGtcattgctg	0.523788	0.648314	5.13275	6.33906	strong	1	1.20631	0.123776
chrX	15335567	chrX:15335567:T:C	T	C	SNV	NR2F2	jaspar2022	MA1111.1	MA1111.1	tccctgctgtCccgcagcacc	0.5127	0.603028	5.38042	6.30408	strong	1	0.923658	0.0891273
chrX	129726568	chrX:129726568:A:G	A	G	SNV	CTCF	jaspar2022	MA1930.1	MA1930.1	aatcgcaccaacctctgctgccctctgctgtctAgttccagatgtgctggctccagttgggccagtta	0.714482	0.679089	11.8367	11.2889	weak	1	-0.547797	-0.0336984
chr17	15699586	chr17:15699586:T:G	T	G	SNV	ZNF24	jaspar2022	MA1124.1	MA1124.1	gctcttcgatcgTccgattctccca	0.574173	0.516568	9.15043	8.26697	strong	1	-0.883464	-0.0563393
chr8	140241819	chr8:140241819:A:G	A	G	SNV	NFIC	jaspar2022	MA1527.1	MA1527.1	gtgtggaacactcggcAgccttcgcagcgtgcc	0.557423	0.533516	9.64141	9.23291	weak	1	-0.408507	-0.0237451
chr5	346695	chr5:346695:T:A	T	A	SNV	NR2F1	jaspar2022	MA1537.1	MA1537.1	ttcacctgcagaccTcagcctcaccctgt	0.615423	0.536172	11.4622	9.99373	strong	1	-1.46847	-0.0790002
chr19	34233214	chr19:34233214:A:C	A	C	SNV	MITF	jaspar2022	MA0620.3	MA0620.3	accgagagcagacagcaCggaacggcagggcccag	0.512782	0.584436	5.90444	6.69967	strong	1	0.795233	0.0703021
chr19	39440419	chr19:39440419:G:C	G	C	SNV	CTCF	jaspar2022	MA1929.1	MA1929.1	ctggatattgtagatttgcatatttgccaacttCcggcagatggcagtaaagtatcttgttctaata	0.827361	0.869269	11.3975	11.9334	weak	1	0.535897	0.0393892
chr20	38926138	chr20:38926138:G:T	G	T	SNV	CTCF	jaspar2022	MA1929.1	MA1929.1	ccttgcacggccgcgcagcggggcgaccggcagGgggcgcgctgggatggccaggagctcggctctc	0.702652	0.663113	9.80284	9.29724	weak	1	-0.5056	-0.0371624
chr16	57116066	chr16:57116066:C:T	C	T	SNV	SP1	jaspar2022	MA0079.5	MA0079.5	agcccacgCgatgcctg	0.583219	0.450232	7.74375	5.98755	strong	1	-1.7562	-0.132567
chr17	68101661	chr17:68101661:C:G	C	G	SNV	SP1	jaspar2022	MA0079.5	MA0079.5	cctgctccCgtgccgcc	0.719184	0.587882	9.53928	7.80533	strong	1	-1.73395	-0.130887
chr10	110497804	chr10:110497804:C:T	C	T	SNV	ZKSCAN1	jaspar2022	MA1585.1	MA1585.1	gcgtggccaCggcccgagg	0.479828	0.3858	6.13262	4.95866	strong	1	-1.17397	-0.0929717
chr9	124217298	chr9:124217298:G:C	G	C	SNV	NFIC	jaspar2022	MA1527.1	MA1527.1	cacacacacacagagaCagagagagagagagag	0.394796	0.511581	6.86255	8.85809	strong	1	1.99554	0.115994
chr12	120317656	chr12:120317656:A:G	A	G	SNV	SP1	jaspar2022	MA0079.5	MA0079.5	gtagaccgGcggctggg	0.583219	0.704873	7.74375	9.3503	strong	1	1.60654	0.12127
chr2	216769091	chr2:216769091:T:C	T	C	SNV	CTCF	jaspar2022	MA0139.1	MA0139.1	gtttcttgggtaatttgaCggaagcagtgttttagga	0.547148	0.583727	7.64663	8.14021	weak	1	0.49358	0.0358779
chr11	33406346	chr11:33406346:T:C	T	C	SNV	NR2F1	jaspar2022	MA0017.2	MA0017.2	gtggggagggggCtcctgccggctg	0.553854	0.618903	6.75257	7.52557	strong	1	0.773003	0.0641269
chr17	7932247	chr17:7932247:A:G	A	G	SNV	MEF2A	jaspar2022	MA0052.4	MA0052.4	ttgagcgtagggggAggcgtgagaggggg	0.417451	0.361668	4.55301	3.98525	weak	1	-0.567769	-0.0541644
chr18	74499889	chr18:74499889:C:G	C	G	SNV	SP1	jaspar2022	MA0079.5	MA0079.5	ggtcgcccCtcagtctc	0.77593	0.653917	10.2887	8.67737	strong	1	-1.61128	-0.121627
chr19	55166155	chr19:55166155:C:T	C	T	SNV	ZNF143	jaspar2022	MA0088.2	MA0088.2	gtattctgggattcgCagtccgcagacagga	0.582475	0.492859	11.383	9.64038	strong	1	-1.74257	-0.0893553
chr9	40992220	chr9:40992220:C:T	C	T	SNV	SP1	jaspar2022	MA0079.5	MA0079.5	gcagccgcCatagctcc	0.613432	0.496074	8.14274	6.59294	strong	1	-1.5498	-0.116986
chr18	37570563	chr18:37570563:G:A	G	A	SNV	CTCF	jaspar2022	MA1929.1	MA1929.1	atggagcgactgctctgcccagacctgcagaggGcagtgagggcaggctggaggaacggagactccc	0.745717	0.689121	10.3535	9.62981	strong	1	-0.72372	-0.0531945
chrX	119853214	chrX:119853214:T:C	T	C	SNV	SP1	jaspar2022	MA0079.5	MA0079.5	attagcaaCtccgccat	0.640443	0.708713	8.49944	9.401	strong	1	0.901556	0.0680539
chr12	131851418	chr12:131851418:T:G	T	G	SNV	RELB	jaspar2022	MA1117.1	MA1117.1	cagagggcacTgtccgccagg	0.748256	0.63526	6.7706	5.78449	strong	1	-0.986105	-0.109964
chr8	140598961	chr8:140598961:C:G	C	G	SNV	CTCF	jaspar2022	MA0139.1	MA0139.1	gaaacgcgacaacagaggGcactttctccaaacccag	0.771299	0.846476	10.6712	11.6856	strong	1	1.0144	0.0737358
chrX	131778999	chrX:131778999:A:G	A	G	SNV	SP1	jaspar2022	MA0079.5	MA0079.5	aagtcgggGgcggggcc	0.852437	1	11.299	13.2477	strong	1	1.94869	0.147097
chr2	197453301	chr2:197453301:A:C	A	C	SNV	NFIC	jaspar2022	MA1527.1	MA1527.1	tgcgcgagcgcacgggCaaagcgattggtcggt	0.498727	0.615512	8.63846	10.634	strong	1	1.99554	0.115994
chr1	218755371	chr1:218755371:A:C	A	C	SNV	NFIB	jaspar2022	MA1643.1	MA1643.1	ctgattcttggcaccaagccAtctgcctattgctctcactt	0.924943	0.840949	15.4676	14.0964	strong	1	-1.37117	-0.0821408
chr11	47412337	chr11:47412337:C:A	C	A	SNV	SOX8	jaspar2022	MA0868.2	MA0868.2	cattgccgcAccctgcagg	0.424683	0.535902	3.9228	4.90891	strong	1	0.98611	0.109279
chr12	111323010	chr12:111323010:A:G	A	G	SNV	NR2F1	jaspar2022	MA0017.2	MA0017.2	gctgcccatgatGgcacgagcaggc	0.571229	0.637387	6.95905	7.74522	strong	1	0.786174	0.0652196
chr6	98834412	chr6:98834412:G:A	G	A	SNV	NEUROD1	jaspar2022	MA1109.1	MA1109.1	gactccgagcccAggggagggggag	0.573355	0.640652	6.4082	7.14328	strong	1	0.735076	0.0664122
chr12	53221209	chr12:53221209:A:G	A	G	SNV	MAZ	jaspar2022	MA1522.1	MA1522.1	tagcccgagcGgtccgccctc	0.57978	0.701263	7.7946	9.41037	strong	1	1.61577	0.120727
chr12	52876623	chr12:52876623:G:A	G	A	SNV	CTCF	jaspar2022	MA0139.1	MA0139.1	aacccagctcagcacaggGcaagctgcccactgctcg	0.693566	0.623094	9.62232	8.6714	strong	1	-0.950917	-0.0691214
chr2	239934642	chr2:239934642:T:C	T	C	SNV	BHLHE41	jaspar2022	MA0636.1	MA0636.1	gaagctgcaCgtgattagt	0.779832	0.917283	11.2507	13.23	strong	1	1.97928	0.137249
chr5	152377075	chr5:152377075:C:G	C	G	SNV	NFIC	jaspar2022	MA1527.1	MA1527.1	ccgttttaggatctctGtctctctgtcttgcct	0.494912	0.611696	8.57326	10.5688	strong	1	1.99554	0.115994
chr19	1453706	chr19:1453706:T:C	T	C	SNV	OLIG2	jaspar2022	MA0678.1	MA0678.1	atatgtctcTgcccacacc	0.459359	0.345053	5.29281	3.99368	strong	1	-1.29913	-0.113586
chr1	43389819	chr1:43389819:C:T	C	T	SNV	NFIC	jaspar2022	MA0161.2	MA0161.2	agtcagcaaaTgcctacgaga	0.618214	0.728177	6.09433	7.14573	strong	1	1.0514	0.107894
chrX	47650835	chrX:47650835:A:G	A	G	SNV	CTCF	jaspar2022	MA0139.1	MA0139.1	ggactgtgagcaactgaaGaggctcggggcctgtgtc	0.545813	0.626264	7.62861	8.71418	strong	1	1.08556	0.0789085
chr11	94603265	chr11:94603265:T:C	T	C	SNV	CTCF	jaspar2022	MA0139.1	MA0139.1	atggggttgatggtcctgCcacctgctgggcgagttt	0.870295	0.940767	12.007	12.9579	strong	1	0.950917	0.0691214
chr1	30685593	chr1:30685593:C:G	C	G	SNV	SP4	jaspar2022	MA0685.2	MA0685.2	ggttgcccGgagacccg	0.607245	0.651431	7.9337	8.5097	weak	1	0.576004	0.0441257
chr19	48993574	chr19:48993574:A:G	A	G	SNV	ZNF24	jaspar2022	MA1124.1	MA1124.1	gggaggaggaggGgggtgggataaa	0.456928	0.486874	7.3523	7.81157	weak	1	0.459269	0.029288
chrX	47541222	chrX:47541222:C:T	C	T	SNV	SOX8	jaspar2022	MA0868.2	MA0868.2	agaaaattcTctggatgga	0.61645	0.732375	5.62308	6.65091	strong	1	1.02783	0.113903
chr3	167928203	chr3:167928203:G:C	G	C	SNV	CTCF	jaspar2022	MA1929.1	MA1929.1	gggggaaccactggtgtagaggaaaagccactaGgcggggctctagagcctggttttgccatgaagt	0.617726	0.565329	8.71686	8.04684	weak	1	-0.670015	-0.0492471
chrX	15493289	chrX:15493289:A:C	A	C	SNV	SP1	jaspar2022	MA0079.5	MA0079.5	ggtccagtCgcctcacc	0.695559	0.780011	9.22729	10.3425	strong	1	1.11526	0.0841852
chr3	197472546	chr3:197472546:T:C	T	C	SNV	NR2F1	jaspar2022	MA1537.1	MA1537.1	gaggggtgctcagcTttggtcccgcaggg	0.663962	0.631556	12.3616	11.7611	weak	1	-0.600448	-0.0323027
chr11	73242795	chr11:73242795:T:C	T	C	SNV	CTCF	jaspar2022	MA0139.1	MA0139.1	tgctgctctgcttcccccTggtggccaaagctggcag	0.927778	0.825104	12.7827	11.3972	strong	1	-1.38544	-0.100706
chr19	53538188	chr19:53538188:C:T	C	T	SNV	CREB1	jaspar2022	MA0018.4	MA0018.4	cggccctgtcccCgtaactgtgaca	0.567226	0.462532	5.95457	4.90197	strong	1	-1.05261	-0.102138
chr6	170067582	chr6:170067582:G:A	G	A	SNV	NEUROD1	jaspar2022	MA1109.1	MA1109.1	atccctcatgccGatgtgatttgtg	0.726871	0.675286	8.08503	7.52158	weak	1	-0.563456	-0.0509068
chrX	119871742	chrX:119871742:C:G	C	G	SNV	NFIC	jaspar2022	MA1527.1	MA1527.1	agaggactgcgagagcGcgagcgcccgtctctc	0.582225	0.62673	10.0652	10.8257	strong	1	0.760475	0.0442037
chr19	36973405	chr19:36973405:G:A	G	A	SNV	CTCF	jaspar2022	MA1929.1	MA1929.1	atgtgcgggctgcatgcccacgcttcaccgctaGgggaggtcagggctgtgcgatggggaaggaaga	0.832252	0.717346	11.4601	9.99074	strong	1	-1.46935	-0.108
chrX	28847457	chrX:28847457:T:C	T	C	SNV	SOX8	jaspar2022	MA0868.2	MA0868.2	ctctacttaCaatggtctt	0.764656	0.931378	6.93713	8.41534	strong	1	1.47821	0.163813
chr16	813838	chr16:813838:G:A	G	A	SNV	CTCF	jaspar2022	MA0139.1	MA0139.1	gtcctcgccgtcaccaccAggtggagccacaggtccg	0.824201	0.926875	11.3851	12.7705	strong	1	1.38544	0.100706
chr15	68230105	chr15:68230105:G:A	G	A	SNV	CLOCK	jaspar2022	MA0819.2	MA0819.2	cctgcacgtGtagcacccg	0.996113	0.838214	9.70825	8.17866	strong	1	-1.52959	-0.156947
chr12	54147223	chr12:54147223:C:T	C	T	SNV	NR2F1	jaspar2022	MA1537.1	MA1537.1	tgtgctggccacacTagcctgtgacttct	0.684307	0.728139	12.7386	13.5508	strong	1	0.812173	0.0436931
chr9	63817338	chr9:63817338:A:G	A	G	SNV	NFIC	jaspar2022	MA0161.2	MA0161.2	gagttgagccAcagaaaggag	0.617336	0.47618	6.08594	4.7363	strong	1	-1.34964	-0.138499
chr3	81929906	chr3:81929906:G:A	G	A	SNV	NFIC	jaspar2022	MA1527.1	MA1527.1	agctggctcagagccaAcattgctgcttaatga	0.937782	0.962263	16.1407	16.559	weak	1	0.418309	0.0243148
chrX	155881414	chrX:155881414:C:T	C	T	SNV	MAZ	jaspar2022	MA1522.1	MA1522.1	tccctccgtcCcgagcccgcg	0.723554	0.579802	9.70685	7.79489	strong	1	-1.91197	-0.142858
chr9	7370565	chr9:7370565:G:C	G	C	SNV	SP1	jaspar2022	MA0079.5	MA0079.5	tggacaatCcctctctt	0.589728	0.622267	7.82971	8.25942	weak	1	0.429707	0.0324364
chr2	85561615	chr2:85561615:C:A	C	A	SNV	CTCF	jaspar2022	MA1930.1	MA1930.1	gcggcgccggattccttgcttggcggcagggggCggaacaaggagccttggagcggggcaaaggtacc	0.751738	0.724374	12.4134	11.9898	weak	1	-0.423538	-0.0260545
chr19	48993574	chr19:48993574:A:G	A	G	SNV	KLF5	jaspar2022	MA0599.1	MA0599.1	aggaggaggGgggtgggat	0.887637	0.936754	10.1951	10.7574	weak	1	0.562246	0.0489704
chr9	40992220	chr9:40992220:C:T	C	T	SNV	ATF7	jaspar2022	MA0834.1	MA0834.1	cctctgcagccgcCatagctccccagc	0.595117	0.506453	9.67696	8.24365	strong	1	-1.43331	-0.0883553
chr2	113604322	chr2:113604322:C:T	C	T	SNV	OLIG2	jaspar2022	MA0678.1	MA0678.1	cagcacaccTgcctgctgg	0.518417	0.575654	5.96404	6.61456	weak	1	0.650514	0.0568759
chr2	218636410	chr2:218636410:G:A	G	A	SNV	NFIC	jaspar2022	MA1527.1	MA1527.1	tgagccagcccctttgGcccctggccaataccc	0.959567	0.846576	16.513	14.5823	strong	1	-1.93071	-0.112226
chr4	186191528	chr4:186191528:A:C	A	C	SNV	NR2F1	jaspar2022	MA1538.1	MA1538.1	gcctccgggcctccAgtgcaatcactacg	0.578796	0.543959	9.51016	8.94741	weak	1	-0.562755	-0.0344944
chr16	4402583	chr16:4402583:G:A	G	A	SNV	CTCF	jaspar2022	MA0139.1	MA0139.1	tgtgaggatgcggacagcGccacccctgggcagggct	0.77438	0.716332	10.7128	9.92952	strong	1	-0.783266	-0.056935
chr16	84199990	chr16:84199990:C:T	C	T	SNV	OLIG2	jaspar2022	MA0678.1	MA0678.1	agttggccgTatctcctct	0.629626	0.670297	7.22798	7.69022	weak	1	0.462243	0.040415
chr17	7836852	chr17:7836852:T:C	T	C	SNV	SP1	jaspar2022	MA0079.5	MA0079.5	gttagaggCggcctggg	0.672693	0.735445	8.92533	9.75402	strong	1	0.828693	0.0625538
chr2	227325286	chr2:227325286:C:G	C	G	SNV	ATF7	jaspar2022	MA0834.1	MA0834.1	tcgcgcttctgccGtggccctctgcgg	0.470457	0.590633	7.66177	9.60448	strong	1	1.94271	0.119757
chr9	63817564	chr9:63817564:T:G	T	G	SNV	FOXK2	jaspar2022	MA1103.2	MA1103.2	atgctttcttTtcattgttga	0.713774	0.535434	6.44222	4.8846	strong	1	-1.55762	-0.17419
chr1	228486873	chr1:228486873:C:T	C	T	SNV	CTCF	jaspar2022	MA1930.1	MA1930.1	agcggaggaggcccacgcaggccatttcccgccCcgtccccagcccacgcgggcgagctaccgcgggg	0.651235	0.598769	10.8578	10.0458	strong	1	-0.812034	-0.0499533
chrX	119853214	chrX:119853214:T:C	T	C	SNV	REST	jaspar2022	MA0138.2	MA0138.2	ccttcgcgcgtcattagcaaCtccgccatcttgaagtgact	0.520738	0.586581	10.8072	12.1188	strong	1	1.31165	0.0644401
chr2	90392334	chr2:90392334:T:C	T	C	SNV	EGR1	jaspar2022	MA0162.4	MA0162.4	atggaatcatcatCgaatggaatcgaa	0.42912	0.472654	4.57931	5.01265	weak	1	0.433338	0.0422283
chr16	85300746	chr16:85300746:C:T	C	T	SNV	ZKSCAN1	jaspar2022	MA1585.1	MA1585.1	cctgcctctTggcttccgc	0.513094	0.618467	6.54796	7.86357	strong	1	1.31561	0.104189
chr2	90392334	chr2:90392334:T:C	T	C	SNV	KLF5	jaspar2022	MA0599.1	MA0599.1	aatcatcatCgaatggaat	0.443958	0.491271	5.11627	5.65787	weak	1	0.541595	0.0471717
chr7	25319069	chr7:25319069:T:G	T	G	SNV	NFIC	jaspar2022	MA0161.2	MA0161.2	tgctgcagagTtggcttcata	0.760762	0.691574	7.45729	6.79576	weak	1	-0.661531	-0.0678859
chr6	41101050	chr6:41101050:C:A	C	A	SNV	CTCF	jaspar2022	MA1929.1	MA1929.1	cagccatggtgaccggcgagcggcatgcgacgcCgcctctgtggcctgtggaggcccgcttggcggc	0.678262	0.645733	9.49096	9.075	weak	1	-0.415956	-0.0305734
chr17	40987206	chr17:40987206:C:T	C	T	SNV	NFIC	jaspar2022	MA1527.1	MA1527.1	gccttaagaaatttggCtcagggccagagctag	0.959246	0.862485	16.5075	14.8541	strong	1	-1.65339	-0.0961059
chr3	148018877	chr3:148018877:A:G	A	G	SNV	NR2F1	jaspar2022	MA0017.2	MA0017.2	gatcatgcctgtGatcccagcactt	0.603195	0.77147	7.33891	9.33858	strong	1	1.99967	0.165889
chr9	109665909	chr9:109665909:C:T	C	T	SNV	SP1	jaspar2022	MA0079.5	MA0079.5	atgcccctCccccagcc	0.960114	0.81255	12.7209	10.7723	strong	1	-1.94869	-0.147097
chr10	41882426	chr10:41882426:C:T	C	T	SNV	ZBTB7B	jaspar2022	MA0694.1	MA0694.1	atggactggaaTggtatggaatg	0.445722	0.507139	5.62668	6.37926	strong	1	0.752579	0.0606012
chr11	119423604	chr11:119423604:A:G	A	G	SNV	CLOCK	jaspar2022	MA0819.2	MA0819.2	ctggagcccAcctcctccg	0.679296	0.520218	6.63918	5.09817	strong	1	-1.54101	-0.158119
chr2	159921990	chr2:159921990:C:G	C	G	SNV	CTCF	jaspar2022	MA0139.1	MA0139.1	cagccatggcgagctcccCctgcaggcagcatcgtgg	0.865366	0.822077	11.9405	11.3564	weak	1	-0.584116	-0.0424589
chr5	14870497	chr5:14870497:T:G	T	G	SNV	CLOCK	jaspar2022	MA0819.2	MA0819.2	tctggccacGtgggacacc	0.836663	0.96634	8.16363	9.41984	strong	1	1.25621	0.128896
chr22	18045062	chr22:18045062:C:T	C	T	SNV	SP1	jaspar2022	MA0079.5	MA0079.5	ggccctccCgactttct	0.753648	0.606085	9.9944	8.04572	strong	1	-1.94869	-0.147097
chr7	34134444	chr7:34134444:G:A	G	A	SNV	NFIB	jaspar2022	MA1643.1	MA1643.1	accatcttgcaagatttgccAggctctgctaggatggggcc	0.51231	0.539755	8.73156	9.17958	weak	1	0.448023	0.0268392
chr1	230910370	chr1:230910370:A:G	A	G	SNV	NFIC	jaspar2022	MA1527.1	MA1527.1	agggcagggcagggctGgcactgcgcactgtgt	0.619379	0.735125	10.7001	12.6779	strong	1	1.97779	0.114962
chr1	26744377	chr1:26744377:T:C	T	C	SNV	NR3C1	jaspar2022	MA0113.3	MA0113.3	gctggaaccttttgttCccttcggaacagcctc	0.774475	0.889031	13.3474	15.3036	strong	1	1.95628	0.113746
chr16	31159853	chr16:31159853:C:T	C	T	SNV	CTCF	jaspar2022	MA1929.1	MA1929.1	tgactgatatgatcaagacatccccttggtgctCcctctcgtggcaagaagagtaactgctccttca	0.880153	0.823557	12.0726	11.3489	strong	1	-0.72372	-0.0531945
chr6	30453779	chr6:30453779:A:G	A	G	SNV	CTCF	jaspar2022	MA1930.1	MA1930.1	gggcgcccccgtgtgcacagagccctgttctgcAgctggaaaccgaacgggaccctgtggaagtcgcg	0.834799	0.784882	13.6989	12.9263	strong	1	-0.772596	-0.0475273
chr10	133396851	chr10:133396851:A:G	A	G	SNV	CTCF	jaspar2022	MA0139.1	MA0139.1	agacagggccaccagaggGctccttggtctagcggta	0.860161	0.930633	11.8703	12.8212	strong	1	0.950917	0.0691214
chr16	84116899	chr16:84116899:G:A	G	A	SNV	ZNF143	jaspar2022	MA0088.2	MA0088.2	ctccgccgacccagcAtgccctgtctgtccc	0.788052	0.870305	15.3803	16.9797	strong	1	1.5994	0.0820138
chr8	41512265	chr8:41512265:T:C	T	C	SNV	CTCF	jaspar2022	MA1930.1	MA1930.1	cagatggagcagctcaacagaatcctgctgtacCtggagtcaaagctggcacagaactgggcagaggg	0.47422	0.575688	8.11806	9.68853	strong	1	1.57048	0.09661
chr12	131622172	chr12:131622172:T:C	T	C	SNV	SP1	jaspar2022	MA0079.5	MA0079.5	acacaaggCggccttgt	0.564344	0.613432	7.4945	8.14274	weak	1	0.648243	0.0489326
chr8	96495297	chr8:96495297:C:T	C	T	SNV	NR2F1	jaspar2022	MA1538.1	MA1538.1	cagcttccctccccTgccctggcggtggg	0.523229	0.553192	8.61253	9.09655	weak	1	0.484028	0.0296688
chr4	7351325	chr4:7351325:C:T	C	T	SNV	SP1	jaspar2022	MA0079.5	MA0079.5	gttcatcaCgacccctg	0.756234	0.649155	10.0285	8.61449	strong	1	-1.41406	-0.10674
chr1	38564287	chr1:38564287:A:G	A	G	SNV	SRF	jaspar2022	MA0083.3	MA0083.3	tatgttgtcacgggtAtgagcccccagcctg	0.49764	0.4086	9.62042	7.93381	strong	1	-1.68661	-0.088137
chr8	21145441	chr8:21145441:A:C	A	C	SNV	TBR1	jaspar2022	MA0802.1	MA0802.1	aacacctccAcactcagca	0.707013	0.621333	7.96189	7.01713	strong	1	-0.944766	-0.0844101
chrX	349473	chrX:349473:A:G	A	G	SNV	SP1	jaspar2022	MA0079.5	MA0079.5	tgctgggaGcaagagga	0.536198	0.656829	7.1228	8.71583	strong	1	1.59303	0.12025
chr1	1349978	chr1:1349978:A:G	A	G	SNV	CTCF	jaspar2022	MA0139.1	MA0139.1	agggcggcccaggatgggGggagtgaggagggggcct	0.651449	0.721921	9.05402	10.0049	strong	1	0.950917	0.0691214
chr22	32412368	chr22:32412368:A:G	A	G	SNV	MEF2A	jaspar2022	MA0052.4	MA0052.4	tagtgtataactttAggatctttattagt	0.707029	0.651247	7.50041	6.93264	weak	1	-0.567769	-0.0541644
chr19	58055386	chr19:58055386:C:G	C	G	SNV	SP1	jaspar2022	MA0079.5	MA0079.5	cctaaccgCgcctccgg	0.755231	0.607668	10.0153	8.06662	strong	1	-1.94869	-0.147097
chr11	66718672	chr11:66718672:T:C	T	C	SNV	NFIC	jaspar2022	MA0161.2	MA0161.2	tgctccccgcTggcagggggc	0.725066	0.587505	7.11599	5.80072	strong	1	-1.31527	-0.134973
chr22	42070901	chr22:42070901:C:T	C	T	SNV	SP1	jaspar2022	MA0079.5	MA0079.5	ctgtgcccCgcccatat	0.883901	0.736338	11.7145	9.76581	strong	1	-1.94869	-0.147097
chr6	31397093	chr6:31397093:T:C	T	C	SNV	TBR1	jaspar2022	MA0802.1	MA0802.1	tccttccaaCcactgccac	0.542655	0.625662	6.14956	7.06485	strong	1	0.915292	0.0817768
chr1	155227477	chr1:155227477:T:C	T	C	SNV	SP4	jaspar2022	MA0685.2	MA0685.2	tggggcccCgcgcacta	0.699331	0.825304	9.13413	10.7763	strong	1	1.64221	0.125804
chr11	78100474	chr11:78100474:C:G	C	G	SNV	NFIC	jaspar2022	MA1527.1	MA1527.1	caaacaaaaaaaatctGgaacaaggtgtacaga	0.416992	0.532738	7.24182	9.21962	strong	1	1.97779	0.114962
chr9	93596999	chr9:93596999:C:T	C	T	SNV	NFIC	jaspar2022	MA0161.2	MA0161.2	ggcacgatctTggctcactgc	0.749475	0.89063	7.34937	8.69901	strong	1	1.34964	0.138499
chr11	43987744	chr11:43987744:G:A	G	A	SNV	SRF	jaspar2022	MA0083.3	MA0083.3	gccggagacctggccAacttcccaacacagc	0.444825	0.46727	8.62001	9.04515	weak	1	0.42514	0.0222166
chr19	20278569	chr19:20278569:A:G	A	G	SNV	CTCF	jaspar2022	MA1929.1	MA1929.1	actatgagacttaatcctacatcaccacctagtGgacagggtggtgcattacataaaattattaaag	0.555707	0.666602	7.92379	9.34186	strong	1	1.41807	0.10423
chr9	40992220	chr9:40992220:C:T	C	T	SNV	MEF2A	jaspar2022	MA0052.4	MA0052.4	ccctctgcagccgcTatagctccccagca	0.508299	0.559002	5.47769	5.99376	weak	1	0.51607	0.0492324
chr22	27316032	chr22:27316032:C:G	C	G	SNV	TBR1	jaspar2022	MA0802.1	MA0802.1	aaaaagaacGtggcagtca	0.589778	0.754983	6.66917	8.49084	strong	1	1.82167	0.162757
chrX	49191162	chrX:49191162:C:T	C	T	SNV	SP1	jaspar2022	MA0079.5	MA0079.5	tctcccccCgcctttcc	0.793524	0.690537	10.521	9.16097	strong	1	-1.36002	-0.102661
chr15	22231840	chr15:22231840:T:A	T	A	SNV	NFIC	jaspar2022	MA0161.2	MA0161.2	ctgtctgcacAgaacagactg	0.562248	0.690453	5.55923	6.78504	strong	1	1.22582	0.125793
chr1	19920759	chr1:19920759:C:T	C	T	SNV	SRF	jaspar2022	MA0083.3	MA0083.3	ctcactgcccccgacTagggggatttctagg	0.534769	0.634589	10.3237	12.2145	strong	1	1.8908	0.0988076
chr19	21329475	chr19:21329475:G:T	G	T	SNV	ATF7	jaspar2022	MA0834.1	MA0834.1	ttcaggccctgagTgacggaagatgtg	0.596575	0.717628	9.70054	11.6574	strong	1	1.95688	0.12063
chr1	65687903	chr1:65687903:A:C	A	C	SNV	NFIB	jaspar2022	MA1643.1	MA1643.1	ggcagaaggaaactttgggcAcagggtcagtgctctgggat	0.747216	0.721986	12.5663	12.1544	weak	1	-0.411868	-0.0246733
chr16	15550988	chr16:15550988:C:T	C	T	SNV	ZNF24	jaspar2022	MA1124.1	MA1124.1	tgggggagaggaTgccacacagtgg	0.467738	0.51195	7.51809	8.19614	weak	1	0.678048	0.0432397
chr9	40992221	chr9:40992221:A:G	A	G	SNV	CREB1	jaspar2022	MA0018.4	MA0018.4	tctgcagccgccAtagctccccagc	0.56469	0.443473	5.92908	4.71034	strong	1	-1.21874	-0.118258
chr9	96341176	chr9:96341176:A:G	A	G	SNV	NR2F1	jaspar2022	MA1538.1	MA1538.1	ctgtaatgccagctActcaggaggccgag	0.591481	0.510746	9.71508	8.41088	strong	1	-1.3042	-0.0799419
chr7	32253349	chr7:32253349:A:T	A	T	SNV	OLIG2	jaspar2022	MA0678.1	MA0678.1	cttctgtaaAtagcctttc	0.544077	0.483788	6.25567	5.57046	weak	1	-0.685205	-0.059909
chr12	53644178	chr12:53644178:T:C	T	C	SNV	NFIC	jaspar2022	MA1527.1	MA1527.1	ttataggcatgagcccTggcacctagccagaag	0.973115	0.856331	16.7445	14.7489	strong	1	-1.99554	-0.115994
chr1	12053501	chr1:12053501:C:T	C	T	SNV	NFIC	jaspar2022	MA0161.2	MA0161.2	agaaccctggCgcctgtgcag	0.745093	0.689432	7.30747	6.77528	weak	1	-0.532193	-0.0546134
chr5	60521569	chr5:60521569:T:G	T	G	SNV	CTCF	jaspar2022	MA1930.1	MA1930.1	gactaagtcactgaaattcactgaaactgcagtGtccccttctgtcaaagggggataacaatatcagc	0.646853	0.674218	10.79	11.2135	weak	1	0.423538	0.0260545
chr14	96146272	chr14:96146272:G:A	G	A	SNV	NFIC	jaspar2022	MA1527.1	MA1527.1	taaatcactcaccattGttctaggcctggggct	0.596619	0.480873	10.3112	8.33338	strong	1	-1.97779	-0.114962
chr16	1964833	chr16:1964833:A:G	A	G	SNV	NFIC	jaspar2022	MA0161.2	MA0161.2	gaagaacgagGcctactggga	0.478873	0.617892	4.76204	6.09126	strong	1	1.32922	0.136404
chr7	36152792	chr7:36152792:C:T	C	T	SNV	NFIC	jaspar2022	MA1527.1	MA1527.1	gccccctaagtcccgcCtctgcgctcccggggc	0.468557	0.410453	8.12292	7.13009	strong	1	-0.99283	-0.0577097
chr1	154348608	chr1:154348608:G:T	G	T	SNV	CTCF	jaspar2022	MA1929.1	MA1929.1	tggggtggctggaaaggcctcatgtgaacactgGggggctctgtggggccatgtggctgttcagtgt	0.739455	0.621665	10.2735	8.76723	strong	1	-1.50622	-0.11071
chr17	6666211	chr17:6666211:A:G	A	G	SNV	SOX8	jaspar2022	MA0868.2	MA0868.2	ccgcacagcAgcaaaggct	0.682335	0.636301	6.20724	5.79908	weak	1	-0.408163	-0.045232
chr10	132113960	chr10:132113960:C:T	C	T	SNV	SOX8	jaspar2022	MA0868.2	MA0868.2	tgtgccgtgTgactttgta	0.549355	0.621689	5.02819	5.66952	weak	1	0.641335	0.0710717
chr5	180313827	chr5:180313827:T:C	T	C	SNV	PKNOX1	jaspar2022	MA0782.2	MA0782.2	gctggccacgccgaTctccggccctgcgt	0.557888	0.490047	6.16854	5.45636	strong	1	-0.712184	-0.0658835
chr1	211649200	chr1:211649200:G:C	G	C	SNV	CTCF	jaspar2022	MA1929.1	MA1929.1	ccgtgtgagcccaggccagccctcctctctactGccctccactgggtccccatggtaaaataagggg	0.706692	0.670974	9.85451	9.39776	weak	1	-0.456742	-0.0335713
chr19	48993574	chr19:48993574:A:G	A	G	SNV	CTCF	jaspar2022	MA1930.1	MA1930.1	ggagctggaggcctcaaagtggggaggaggaggGgggtgggataaagaggaaaggagcgtggaggacg	0.535887	0.588352	9.0725	9.88453	strong	1	0.812034	0.0499533
chr16	66604901	chr16:66604901:G:A	G	A	SNV	CTCF	jaspar2022	MA1930.1	MA1930.1	ccccgcggtccccgggctccgcgccctgctgccGgcgcgggctttcctctgctctctcaaaggccgcc	0.758529	0.645343	12.5185	10.7666	strong	1	-1.75184	-0.107767
chr22	28918208	chr22:28918208:T:C	T	C	SNV	SP1	jaspar2022	MA0079.5	MA0079.5	agcggcccCtttagggt	0.613432	0.735445	8.14274	9.75402	strong	1	1.61128	0.121627
chr3	64023593	chr3:64023593:G:A	G	A	SNV	SP1	jaspar2022	MA0079.5	MA0079.5	cggcctggGcgcctgcg	0.669704	0.632448	8.88586	8.39386	weak	1	-0.492	-0.0371386
chr9	86044223	chr9:86044223:C:G	C	G	SNV	CTCF	jaspar2022	MA1929.1	MA1929.1	acattgccaaaggcctactggggacaagactgcCcccacgtgagaaccactggcatagctgaataag	0.818919	0.706365	11.2896	9.85033	strong	1	-1.43927	-0.105789
chrX	49002612	chrX:49002612:G:T	G	T	SNV	SP1	jaspar2022	MA0079.5	MA0079.5	gaagcttcGctctggtc	0.601634	0.561748	7.98694	7.46021	weak	1	-0.526731	-0.0397602
chr20	24609323	chr20:24609323:G:A	G	A	SNV	SP1	jaspar2022	MA0079.5	MA0079.5	tggaaggcGgatgtggg	0.663912	0.595642	8.80937	7.90781	strong	1	-0.901556	-0.0680539
chr3	77200586	chr3:77200586:G:A	G	A	SNV	SOX8	jaspar2022	MA0868.2	MA0868.2	cataaagacAatgctccta	0.713259	0.92855	6.48141	8.39027	strong	1	1.90886	0.211536
chrX	72088938	chrX:72088938:G:A	G	A	SNV	SP1	jaspar2022	MA0079.5	MA0079.5	tacccttcGgatggccg	0.55068	0.458522	7.31405	6.09703	strong	1	-1.21702	-0.0918667
chr5	152377075	chr5:152377075:C:G	C	G	SNV	NFIC	jaspar2022	MA0161.2	MA0161.2	taggatctctGtctctctgtc	0.296471	0.461255	3.01803	4.59359	strong	1	1.57556	0.161683
chr9	91078471	chr9:91078471:C:A	C	A	SNV	CTCF	jaspar2022	MA1929.1	MA1929.1	taattcacacccaggagaggggatgctgccgggAgatggctctcacagcacgacgccttcatctctg	0.589736	0.621477	8.35894	8.76482	weak	1	0.405881	0.0298329
chr11	18145219	chr11:18145219:C:A	C	A	SNV	CTCF	jaspar2022	MA1930.1	MA1930.1	tcttccccacattagagccgccttgggctccccCtactgtcatagccactctgtttcttcccaaatcc	0.739931	0.623874	12.2306	10.4343	strong	1	-1.79628	-0.110501
chr19	53554523	chr19:53554523:C:G	C	G	SNV	SP1	jaspar2022	MA0079.5	MA0079.5	atgggtggGgggaccga	0.788609	0.821149	10.4561	10.8858	weak	1	0.429707	0.0324364
chr2	238320388	chr2:238320388:C:A	C	A	SNV	NEUROD1	jaspar2022	MA1109.1	MA1109.1	gcggaacccccaCtcctgcctgcgc	0.652651	0.574602	7.27434	6.42182	strong	1	-0.852519	-0.0770229
chr13	26518132	chr13:26518132:G:C	G	C	SNV	NFIC	jaspar2022	MA0161.2	MA0161.2	cagctcaccaCatggtgtgcc	0.556014	0.604917	5.49962	5.9672	weak	1	0.467578	0.0479826
chr3	81929906	chr3:81929906:G:A	G	A	SNV	NFIC	jaspar2022	MA0161.2	MA0161.2	ctcagagccaAcattgctgct	0.616857	0.760596	6.08137	7.45571	strong	1	1.37434	0.141034
chr17	38586057	chr17:38586057:C:T	C	T	SNV	NFIC	jaspar2022	MA0161.2	MA0161.2	gggaagggagCccactggaca	0.617534	0.473485	6.08783	4.71053	strong	1	-1.37731	-0.141338
chr14	96263805	chr14:96263805:A:G	A	G	SNV	NFIC	jaspar2022	MA1527.1	MA1527.1	tgcacagagtgctgccAacatttatcatctcca	0.642212	0.525428	11.0902	9.09469	strong	1	-1.99554	-0.115994
chr2	7661608	chr2:7661608:C:T	C	T	SNV	NFIC	jaspar2022	MA1527.1	MA1527.1	cctgtgggagatctggCtccctgccagccaggg	0.972023	0.875262	16.7258	15.0724	strong	1	-1.65339	-0.0961059
chr22	47968043	chr22:47968043:C:T	C	T	SNV	NFIC	jaspar2022	MA0161.2	MA0161.2	acctggtgctTggctaggacc	0.749019	0.890174	7.34501	8.69465	strong	1	1.34964	0.138499
chr12	53644178	chr12:53644178:T:C	T	C	SNV	NFIC	jaspar2022	MA0161.2	MA0161.2	gcatgagcccTggcacctagc	0.855024	0.713869	8.35857	7.00893	strong	1	-1.34964	-0.138499
chr9	63816930	chr9:63816930:A:T	A	T	SNV	TBR1	jaspar2022	MA0802.1	MA0802.1	acccaacatTttcccggag	0.526662	0.565632	5.97321	6.40292	weak	1	0.429715	0.0383929
chr5	180313827	chr5:180313827:T:C	T	C	SNV	CTCF	jaspar2022	MA0139.1	MA0139.1	tggtgctggccacgccgaCctccggccctgcgttgat	0.569722	0.709185	7.95123	9.83308	strong	1	1.88185	0.13679
chr2	241732738	chr2:241732738:G:A	G	A	SNV	CTCF	jaspar2022	MA0139.1	MA0139.1	acgggtgtcttcccagacGctggcgtcaccgctagac	0.788247	0.648784	10.8999	9.01806	strong	1	-1.88185	-0.13679
chr8	20436846	chr8:20436846:T:G	T	G	SNV	CTCF	jaspar2022	MA1930.1	MA1930.1	tggctcagcagagcgtgtgagatgtgatcacaaGcttgaaataacacagacagtctctgctctctgcc	0.451173	0.56723	7.76133	9.55761	strong	1	1.79628	0.110501
chr8	135584189	chr8:135584189:T:G	T	G	SNV	SOX8	jaspar2022	MA0868.2	MA0868.2	tactgcagcTgtgatttca	0.60696	0.489001	5.53894	4.49307	strong	1	-1.04587	-0.115902
chr1	201114215	chr1:201114215:A:G	A	G	SNV	NFIC	jaspar2022	MA1527.1	MA1527.1	gtctgggctgagcgccAgcagcaatctggcctc	0.849493	0.732708	14.6321	12.6366	strong	1	-1.99554	-0.115994
chr20	25116153	chr20:25116153:A:C	A	C	SNV	SP1	jaspar2022	MA0079.5	MA0079.5	cacccctgCtgctgtga	0.52386	0.608671	6.95986	8.07986	strong	1	1.12	0.0845429
chr1	204737104	chr1:204737104:A:G	A	G	SNV	ZNF24	jaspar2022	MA1124.1	MA1124.1	gaccaggtgcagGagccaaaacata	0.416789	0.515596	6.7367	8.25207	strong	1	1.51536	0.096636
chr9	105921597	chr9:105921597:G:A	G	A	SNV	CTCF	jaspar2022	MA0139.1	MA0139.1	tgcctcttgataggaagtGgcaaggttccagaagggc	0.575874	0.50641	8.03424	7.09693	strong	1	-0.937309	-0.0681322
chr17	41307794	chr17:41307794:G:C	G	C	SNV	NFIC	jaspar2022	MA1527.1	MA1527.1	agtgggctggcagggaGcctcttctgagacatc	0.84789	0.751129	14.6047	12.9513	strong	1	-1.65339	-0.0961059
chr11	888957	chr11:888957:G:A	G	A	SNV	CTCF	jaspar2022	MA0139.1	MA0139.1	gcccctccccctccagacGgctggacgcgctctgctc	0.833608	0.762394	11.512	10.5511	strong	1	-0.960931	-0.0698493
chr10	124694121	chr10:124694121:C:T	C	T	SNV	MEF2A	jaspar2022	MA0052.4	MA0052.4	gtacaacggctcccTgcttctccctctgc	0.387767	0.51805	4.25089	5.57694	strong	1	1.32605	0.126503
chr4	89824091	chr4:89824091:T:C	T	C	SNV	NFIC	jaspar2022	MA0161.2	MA0161.2	ccaccgcgccTggcctgaagc	0.744153	0.602998	7.29849	5.94885	strong	1	-1.34964	-0.138499
chr11	56950711	chr11:56950711:G:T	G	T	SNV	CTCF	jaspar2022	MA1930.1	MA1930.1	cgattctcagagtgtgcaaaaaatctccagtagGgggggttgagtacacaaggaaaagttcagacaca	0.744026	0.713034	12.294	11.8143	weak	1	-0.47969	-0.0295087
chr1	234780909	chr1:234780909:G:A	G	A	SNV	NR2F1	jaspar2022	MA0017.2	MA0017.2	tctctagaggcgAcatacacatctg	0.570809	0.604798	6.95405	7.35795	weak	1	0.403906	0.0335073
chr2	96580930	chr2:96580930:T:C	T	C	SNV	SP1	jaspar2022	MA0079.5	MA0079.5	agaaccagCgctgccac	0.604064	0.672334	8.01903	8.92059	strong	1	0.901556	0.0680539
chr9	40992190	chr9:40992190:C:T	C	T	SNV	MEF2A	jaspar2022	MA0052.4	MA0052.4	agggagcagatgcgTgcagacacctttcg	0.452931	0.508714	4.91414	5.48191	weak	1	0.567769	0.0541644
chr7	132212175	chr7:132212175:G:A	G	A	SNV	NEUROD1	jaspar2022	MA1109.1	MA1109.1	gctcctgggcagAttgatcatcaaa	0.715449	0.822591	7.96027	9.13057	strong	1	1.1703	0.105733
chr19	56839696	chr19:56839696:A:G	A	G	SNV	SP4	jaspar2022	MA0685.2	MA0685.2	gggctggaGcagaccat	0.614396	0.763883	8.02691	9.97564	strong	1	1.94873	0.149286
chr1	5394347	chr1:5394347:C:T	C	T	SNV	CTCF	jaspar2022	MA1930.1	MA1930.1	ccctgcaactagagggcaccacagcctcgctgcTcttgcaccaaccctagtactccaagcaaaggcca	0.643628	0.700972	10.7401	11.6276	strong	1	0.887545	0.0545985
chr18	32093418	chr18:32093418:T:C	T	C	SNV	MAZ	jaspar2022	MA1522.1	MA1522.1	agagctcttcCgtaacttccc	0.591609	0.714393	7.95192	9.585	strong	1	1.63308	0.12202
chr9	133117657	chr9:133117657:A:G	A	G	SNV	SOX8	jaspar2022	MA0868.2	MA0868.2	aaatggggaAcactgctct	0.810055	0.608172	7.33965	5.54968	strong	1	-1.78997	-0.198362
chr17	6655010	chr17:6655010:G:A	G	A	SNV	CTCF	jaspar2022	MA1930.1	MA1930.1	gaggagttccggaaaccacggctccctcttgcgGtcccggggcaccgaggaatatggggacggtggct	0.71208	0.66531	11.7995	11.0757	strong	1	-0.723884	-0.0445307
chr14	77979831	chr14:77979831:T:C	T	C	SNV	NEUROD1	jaspar2022	MA1109.1	MA1109.1	gagcactagaggTgggagctgcccc	0.722822	0.629135	8.04081	7.01748	strong	1	-1.02333	-0.0924557
chr9	63817338	chr9:63817338:A:G	A	G	SNV	NFIC	jaspar2022	MA1527.1	MA1527.1	gcggaggagttgagccAcagaaaggagaactgg	0.70451	0.587725	12.1547	10.1592	strong	1	-1.99554	-0.115994
chr3	142498695	chr3:142498695:A:G	A	G	SNV	MEF2A	jaspar2022	MA0052.4	MA0052.4	agtttcagtgagtcAtaaaaagctgtgat	0.691613	0.631877	7.3435	6.73549	weak	1	-0.608013	-0.0580036
chr5	158755450	chr5:158755450:G:C	G	C	SNV	NFIC	jaspar2022	MA0161.2	MA0161.2	ctctgcacctGtctcctattt	0.591924	0.47721	5.84297	4.74615	strong	1	-1.09682	-0.112555
chr19	53554523	chr19:53554523:C:G	C	G	SNV	BHLHE40	jaspar2022	MA0464.2	MA0464.2	catgggtggCgggaccgac	0.552752	0.485165	6.54061	5.75188	strong	1	-0.78873	-0.0670694
chr4	130336788	chr4:130336788:A:G	A	G	SNV	CTCF	jaspar2022	MA1929.1	MA1929.1	attataaacatattctcccttcctccattaggtGgcagcacacctaccttctcatgaggattagtgt	0.647249	0.701311	9.09438	9.7857	weak	1	0.69132	0.0508131
chr12	30965360	chr12:30965360:C:T	C	T	SNV	NR2F1	jaspar2022	MA1537.1	MA1537.1	aggctgccaagccaTgtgctctcacctgc	0.654509	0.69834	12.1864	12.9986	strong	1	0.812173	0.0436931
chr19	17747601	chr19:17747601:G:A	G	A	SNV	PKNOX1	jaspar2022	MA0782.2	MA0782.2	gctggcggagctggAcgcctaaatggccc	0.496767	0.550788	5.52691	6.094	weak	1	0.5671	0.0524619
chr21	10403139	chr21:10403139:G:T	G	T	SNV	NFIC	jaspar2022	MA0161.2	MA0161.2	tgagaggctgTagggagatct	0.477511	0.583566	4.74902	5.76306	strong	1	1.01403	0.104059
chr16	721108	chr16:721108:C:A	C	A	SNV	BHLHE40	jaspar2022	MA0464.2	MA0464.2	ggcggagcgCacagcgcca	0.50317	0.380462	5.96199	4.53002	strong	1	-1.43197	-0.121768
chr16	2090548	chr16:2090548:C:A	C	A	SNV	NR2F1	jaspar2022	MA1538.1	MA1538.1	cagcaccaacagggCctgggccacgctcc	0.619681	0.548773	10.1706	9.02517	strong	1	-1.14545	-0.0702112
chr6	53682921	chr6:53682921:T:C	T	C	SNV	NEUROD1	jaspar2022	MA1109.1	MA1109.1	gtcctgatcatcTgtctccagatct	0.906158	0.741891	10.0434	8.2491	strong	1	-1.79426	-0.162107
chr7	36152792	chr7:36152792:C:T	C	T	SNV	SP1	jaspar2022	MA0079.5	MA0079.5	agtcccgcCtctgcgct	0.784167	0.636604	10.3974	8.44874	strong	1	-1.94869	-0.147097
chr20	50658954	chr20:50658954:G:T	G	T	SNV	SP4	jaspar2022	MA0685.2	MA0685.2	tggcagatGgagttagc	0.6355	0.486013	8.30202	6.35329	strong	1	-1.94873	-0.149286
chr6	56279560	chr6:56279560:T:C	T	C	SNV	NEUROD1	jaspar2022	MA1109.1	MA1109.1	attccattccaaCtgtcagatttga	0.749265	0.88761	8.32964	9.84076	strong	1	1.51112	0.136525
chr7	102467250	chr7:102467250:G:C	G	C	SNV	CTCF	jaspar2022	MA1930.1	MA1930.1	ttatgaggctgtgattccaggaggcttccagcaGgtggcgggattgagattccctgagatggagggct	0.872296	0.756285	14.2793	12.4837	strong	1	-1.79557	-0.110457
chr9	126914612	chr9:126914612:G:A	G	A	SNV	ZNF384	jaspar2022	MA1125.1	MA1125.1	cctgcgggcggAgagggcgtctg	0.167631	0.32026	2.21223	4.08256	strong	1	1.87033	0.150685
chr1	39609786	chr1:39609786:C:T	C	T	SNV	CTCF	jaspar2022	MA1930.1	MA1930.1	gggagactcggtggcctgcagtgttcaaagcgcCctctggcggccgggaggagcgggggctgcaggga	0.819378	0.716661	13.4603	11.8705	strong	1	-1.5898	-0.0977989
chr5	37932667	chr5:37932667:C:T	C	T	SNV	NFIC	jaspar2022	MA0161.2	MA0161.2	ttccaatcccTggcatagtgc	0.714214	0.855369	7.01223	8.36187	strong	1	1.34964	0.138499
chr7	106788857	chr7:106788857:G:A	G	A	SNV	NFIC	jaspar2022	MA0161.2	MA0161.2	ctgtggattgGcctaatgcca	0.758932	0.602811	7.4398	5.94707	strong	1	-1.49273	-0.153183
chr4	44671809	chr4:44671809:T:C	T	C	SNV	TCF12	jaspar2022	MA1648.1	MA1648.1	agagactggaCtgatgcagct	0.467783	0.598932	4.10214	5.20083	strong	1	1.09869	0.128341
chr17	7280727	chr17:7280727:G:A	G	A	SNV	CTCF	jaspar2022	MA0139.1	MA0139.1	ctcctcgctcgccctccaGgtggcagcacaaccctgc	0.901432	0.761969	12.4272	10.5453	strong	1	-1.88185	-0.13679
chr6	12011294	chr6:12011294:T:C	T	C	SNV	NEUROD1	jaspar2022	MA1109.1	MA1109.1	cccgcctcccccTcccccattctgc	0.573355	0.515732	6.4082	5.7788	weak	1	-0.629403	-0.056865
chr12	112418839	chr12:112418839:G:A	G	A	SNV	ATF7	jaspar2022	MA0834.1	MA0834.1	gtcctccgctgacGggaagcaggaagt	0.694592	0.574852	11.285	9.34936	strong	1	-1.93567	-0.119323
chr1	235069780	chr1:235069780:C:T	C	T	SNV	NR2F2	jaspar2022	MA1111.1	MA1111.1	acccacgtggCttgcttctaa	0.594543	0.542819	6.21732	5.6884	weak	1	-0.528918	-0.0510374
chr22	20079994	chr22:20079994:T:G	T	G	SNV	ZBTB7B	jaspar2022	MA0694.1	MA0694.1	ggcattcccggTgcttcccgttc	0.686478	0.652217	8.5768	8.15699	weak	1	-0.419817	-0.0338056
chr1	144102685	chr1:144102685:G:T	G	T	SNV	NR2F1	jaspar2022	MA1538.1	MA1538.1	ctggctggctggctTgctggctggctggc	0.509242	0.552248	8.38658	9.08131	weak	1	0.694729	0.0425839
chr1	228082567	chr1:228082567:A:G	A	G	SNV	SP1	jaspar2022	MA0079.5	MA0079.5	cccggggcGgggtgtcc	0.852437	1	11.299	13.2477	strong	1	1.94869	0.147097
chr7	151276155	chr7:151276155:T:G	T	G	SNV	NR2F1	jaspar2022	MA1538.1	MA1538.1	ggtcgggggggaggTgccctgcaagaagg	0.665231	0.611313	10.9065	10.0355	strong	1	-0.870992	-0.0533881
chr19	5031418	chr19:5031418:G:C	G	C	SNV	NR2F1	jaspar2022	MA1537.1	MA1537.1	acggtgcacttgggCcctcctgtgcagac	0.547462	0.637774	10.2029	11.8763	strong	1	1.67341	0.0900259
chr16	813838	chr16:813838:G:A	G	A	SNV	CTCF	jaspar2022	MA1930.1	MA1930.1	ctggggtctcccgccgtcctcgccgtcaccaccAggtggagccacaggtccgtgtgatcgtccccgtg	0.621152	0.659369	10.3922	10.9837	weak	1	0.591513	0.0363877
chr14	104747006	chr14:104747006:A:G	A	G	SNV	NR3C1	jaspar2022	MA0113.3	MA0113.3	tccagctgttttagtcAcagactgagctgatcc	0.715111	0.599358	12.3336	10.3569	strong	1	-1.9767	-0.114934
chrX	71254216	chrX:71254216:C:T	C	T	SNV	ZBTB7B	jaspar2022	MA0694.1	MA0694.1	aaccccattggTtggctcgagga	0.603482	0.664899	7.5598	8.31238	strong	1	0.752579	0.0606012
chr1	121750217	chr1:121750217:G:A	G	A	SNV	ZBTB7B	jaspar2022	MA0694.1	MA0694.1	tgaggtcaacgGtagaataggaa	0.562966	0.529549	7.06334	6.65387	weak	1	-0.409469	-0.0329723
chr10	45282240	chr10:45282240:T:A	T	A	SNV	CTCF	jaspar2022	MA0139.1	MA0139.1	atcccaaaaaagtccagaAgatggtgactgctgcgtg	0.745857	0.850287	10.3279	11.737	strong	1	1.40912	0.102428
chr1	1306149	chr1:1306149:A:G	A	G	SNV	NR2F1	jaspar2022	MA0017.2	MA0017.2	cccagggcagtcGctctacggcacc	0.739707	0.78362	8.96112	9.48296	weak	1	0.521834	0.0432903
chr12	113757309	chr12:113757309:C:T	C	T	SNV	CTCF	jaspar2022	MA1930.1	MA1930.1	tagcttcccctcctcccagctccaggcctccacCtgctgggcggcatcttgtctcccatccttgcgag	0.787292	0.672341	12.9636	11.1845	strong	1	-1.77917	-0.109448
chr16	3432002	chr16:3432002:G:T	G	T	SNV	MEF2A	jaspar2022	MA0052.4	MA0052.4	ccgctgtagcgcaaTtcatctcgttgaca	0.47589	0.524341	5.14782	5.64097	weak	1	0.493151	0.0470459
chr6	159693540	chr6:159693540:G:T	G	T	SNV	ZKSCAN1	jaspar2022	MA1585.1	MA1585.1	cctgcccccTtggagttgg	0.47356	0.602807	6.05436	7.66806	strong	1	1.61369	0.127796
chr4	1051037	chr4:1051037:C:G	C	G	SNV	OLIG2	jaspar2022	MA0678.1	MA0678.1	tagcgccctCcagtgttgc	0.491105	0.425048	5.65362	4.90286	strong	1	-0.750766	-0.0656412
chr4	186723792	chr4:186723792:A:G	A	G	SNV	CTCF	jaspar2022	MA0139.1	MA0139.1	ccgcatggtacctgccgcAcgagccgctcccgcgccc	0.642761	0.595549	8.93679	8.29972	weak	1	-0.637063	-0.0463076
chr7	77450989	chr7:77450989:T:C	T	C	SNV	SOX8	jaspar2022	MA0868.2	MA0868.2	tcaggagttTgaggccagc	0.594965	0.465685	5.43258	4.28633	strong	1	-1.14625	-0.127026
chr17	17844699	chr17:17844699:A:G	A	G	SNV	SP1	jaspar2022	MA0079.5	MA0079.5	atggtgccGggggccca	0.665251	0.704873	8.82705	9.3503	weak	1	0.523246	0.0394972
chr1	2391602	chr1:2391602:T:C	T	C	SNV	MEF2A	jaspar2022	MA0052.4	MA0052.4	gtcgcaagggggggTgtggccacgggcct	0.382227	0.295318	4.19451	3.30992	strong	1	-0.884588	-0.0843885
chr9	111525118	chr9:111525118:C:A	C	A	SNV	FOXK2	jaspar2022	MA1103.2	MA1103.2	tttcggaaagAtgcacgagcg	0.540524	0.709302	4.92905	6.40316	strong	1	1.47411	0.16485
chr2	71373891	chr2:71373891:C:T	C	T	SNV	NFIC	jaspar2022	MA0161.2	MA0161.2	ggcacaatttTggctcattgc	0.619405	0.76056	6.10572	7.45536	strong	1	1.34964	0.138499
chr16	8795295	chr16:8795295:C:G	C	G	SNV	CTCF	jaspar2022	MA1930.1	MA1930.1	tggggtttcgtgcctacctggacgacatctgctGgtcaatgtgtagttaacatcctgacagacccttc	0.566204	0.607755	9.54174	10.1848	weak	1	0.643108	0.0395616
chr10	13352725	chr10:13352725:G:A	G	A	SNV	CTCF	jaspar2022	MA0139.1	MA0139.1	acaggactgccctctgccGgtcccaggctggtccctg	0.876147	0.737542	12.086	10.2157	strong	1	-1.87027	-0.135949
chr12	103583135	chr12:103583135:A:G	A	G	SNV	NFIC	jaspar2022	MA0161.2	MA0161.2	gcctctagccAagatgtttca	0.890591	0.749436	8.69863	7.349	strong	1	-1.34964	-0.138499
chr6	33702593	chr6:33702593:G:A	G	A	SNV	CTCF	jaspar2022	MA1930.1	MA1930.1	gagacagcagtgcccctgctggaccttctcaggGagacaggcagcatacagaggaggtgtggtctttt	0.673369	0.628224	11.2004	10.5017	weak	1	-0.698732	-0.0429834
chr6	28589356	chr6:28589356:T:A	T	A	SNV	REST	jaspar2022	MA0138.2	MA0138.2	gtatttaaccacgactatacAtacctactgtacccttgtgg	0.471728	0.518081	9.83086	10.7543	strong	1	0.923402	0.045366
chr4	2366017	chr4:2366017:G:A	G	A	SNV	SRF	jaspar2022	MA0083.3	MA0083.3	gggcaagatacagccAgcctcactgtgaact	0.617915	0.640359	11.8987	12.3238	weak	1	0.42514	0.0222166
chr6	28863674	chr6:28863674:A:G	A	G	SNV	SP1	jaspar2022	MA0079.5	MA0079.5	ggcgggagGaaaatgaa	0.641041	0.74812	8.50734	9.9214	strong	1	1.41406	0.10674
chr7	26681994	chr7:26681994:C:T	C	T	SNV	CTCF	jaspar2022	MA1929.1	MA1929.1	acagctgcaattacctgcaccactcattctgagCcactagatggcgtaaaaaaaaacagaaaggtaa	0.655983	0.613449	9.20607	8.66216	weak	1	-0.543906	-0.0399779
chr2	11397326	chr2:11397326:T:C	T	C	SNV	MEIS2	jaspar2022	MA0774.1	MA0774.1	taccagaCggtctgg	0.539485	0.628833	5.54166	6.44001	strong	1	0.898349	0.0883168
chr8	10313221	chr8:10313221:A:G	A	G	SNV	MEF2A	jaspar2022	MA0052.4	MA0052.4	gaacttctctctctAtattcagtctgcct	0.823458	0.682252	8.68545	7.24822	strong	1	-1.43723	-0.13711
chr15	73153207	chr15:73153207:A:G	A	G	SNV	NFIC	jaspar2022	MA0161.2	MA0161.2	attgagtgccAtctgctgtaa	0.723898	0.582743	7.10482	5.75518	strong	1	-1.34964	-0.138499
chr5	154541900	chr5:154541900:G:A	G	A	SNV	CTCF	jaspar2022	MA0139.1	MA0139.1	tgtgcagggcctgaggtgGgtaggaacctgaggggct	0.684661	0.613447	9.50216	8.54123	strong	1	-0.960925	-0.0698488
chr22	46762547	chr22:46762547:T:C	T	C	SNV	CREB1	jaspar2022	MA0018.4	MA0018.4	cgttgcgcggcgTcgccctttaata	0.542505	0.429916	5.70603	4.57404	strong	1	-1.13199	-0.109841
chrX	119853214	chrX:119853214:T:C	T	C	SNV	CREM	jaspar2022	MA0609.2	MA0609.2	gcgcgtcattagcaaTtccgccatcttgaag	0.554293	0.474731	5.6642	4.90116	strong	1	-0.763042	-0.0767741
chr1	25819901	chr1:25819901:C:G	C	G	SNV	NR2F1	jaspar2022	MA1537.1	MA1537.1	tgcgcggaggtgcgGctcggtgcgcagct	0.46328	0.500361	8.6431	9.33017	weak	1	0.687072	0.0369629
chr10	70669027	chr10:70669027:C:G	C	G	SNV	CTCF	jaspar2022	MA0139.1	MA0139.1	agcagtgtccacagagggCtgctggtggcctgctggg	0.788062	0.686419	10.8974	9.52588	strong	1	-1.37153	-0.0996953
chrX	103310978	chrX:103310978:C:A	C	A	SNV	SP1	jaspar2022	MA0079.5	MA0079.5	cgccacaaCgaggtaag	0.609582	0.493483	8.0919	6.55872	strong	1	-1.53318	-0.115732
chr19	495871	chr19:495871:C:T	C	T	SNV	CTCF	jaspar2022	MA1929.1	MA1929.1	ggaaagtgcaggcgggccgggcgcggtggctcaTgcctgtgatctcagcactttgggaggccgaggt	0.557816	0.604514	7.95076	8.54791	weak	1	0.597148	0.0438913
chr6	32838807	chr6:32838807:G:A	G	A	SNV	MEF2A	jaspar2022	MA0052.4	MA0052.4	ctttcgcttccccaAccaaggccttcatt	0.354652	0.475058	3.91384	5.13936	strong	1	1.22552	0.116913
chr4	78939358	chr4:78939358:C:T	C	T	SNV	RELB	jaspar2022	MA1117.1	MA1117.1	gctgccgctgTtgcccagggc	0.631968	0.743283	5.75576	6.7272	strong	1	0.971439	0.108328
chr6	44010138	chr6:44010138:C:T	C	T	SNV	NFIC	jaspar2022	MA0161.2	MA0161.2	gtgagactggTgctatgccag	0.616121	0.690338	6.07433	6.78394	strong	1	0.709616	0.0728204
chr22	18057811	chr22:18057811:T:C	T	C	SNV	MITF	jaspar2022	MA0620.3	MA0620.3	cactcaaatgagcatcaCgagcaaggctcaaggcc	0.673309	0.72383	7.68599	8.24668	weak	1	0.560687	0.0495672
chr12	94833160	chr12:94833160:G:A	G	A	SNV	MEF2A	jaspar2022	MA0052.4	MA0052.4	agacagccaaggggAaagtgcctgtgtct	0.404902	0.488287	4.42529	5.274	strong	1	0.848705	0.0809653
chr15	24773224	chr15:24773224:C:G	C	G	SNV	SP1	jaspar2022	MA0079.5	MA0079.5	gccggcagGagccgatc	0.587882	0.668826	7.80533	8.87427	strong	1	1.06894	0.0806885
chr22	45102122	chr22:45102122:G:A	G	A	SNV	CTCF	jaspar2022	MA0139.1	MA0139.1	aagcatcgggagccatgtGgccaggcagaaatgggaa	0.600966	0.489922	8.37282	6.87444	strong	1	-1.49837	-0.108916
chr1	24718035	chr1:24718035:A:G	A	G	SNV	ATF7	jaspar2022	MA0834.1	MA0834.1	agtctagcacagcAtccacttggctgt	0.560909	0.501657	9.12396	8.16613	strong	1	-0.957836	-0.059045
chr5	170782631	chr5:170782631:C:T	C	T	SNV	NFIC	jaspar2022	MA0161.2	MA0161.2	aggaagttggCttggggccaa	0.760796	0.621776	7.45761	6.12839	strong	1	-1.32922	-0.136404
chr9	111525118	chr9:111525118:C:A	C	A	SNV	NEUROD1	jaspar2022	MA1109.1	MA1109.1	actttcggaaagAtgcacgagcgcg	0.640358	0.743504	7.14007	8.26671	strong	1	1.12664	0.101789
chr2	54285632	chr2:54285632:T:G	T	G	SNV	ZNF24	jaspar2022	MA1124.1	MA1124.1	gtaatacatgtgTttttactgggca	0.574212	0.534681	9.15103	8.54476	weak	1	-0.606263	-0.0386619
chr7	36127575	chr7:36127575:C:T	C	T	SNV	OLIG2	jaspar2022	MA0678.1	MA0678.1	actgaaaacCacttgagga	0.61552	0.492923	7.06765	5.67428	strong	1	-1.39337	-0.121825
chr19	53554523	chr19:53554523:C:G	C	G	SNV	KLF5	jaspar2022	MA0599.1	MA0599.1	catgggtggGgggaccgac	0.869639	0.983419	9.98909	11.2915	strong	1	1.30245	0.11344
chrX	149540994	chrX:149540994:C:T	C	T	SNV	CREB1	jaspar2022	MA0018.4	MA0018.4	tgaaagggatgaTgggagctgtatg	0.726329	0.767875	7.55422	7.97193	weak	1	0.417708	0.0405316
chr9	27246118	chr9:27246118:C:G	C	G	SNV	NFIC	jaspar2022	MA0161.2	MA0161.2	aagacatctgCctagaagcca	0.858898	0.701296	8.39561	6.88871	strong	1	-1.50689	-0.154637
chr19	50329176	chr19:50329176:C:T	C	T	SNV	TCF12	jaspar2022	MA1648.1	MA1648.1	agcgaggtagCgggggcgtgg	0.762285	0.625357	6.56931	5.4222	strong	1	-1.14711	-0.133996
chr22	42070901	chr22:42070901:C:T	C	T	SNV	SP4	jaspar2022	MA0685.2	MA0685.2	ctgtgcccCgcccatat	0.974791	0.825304	12.7251	10.7763	strong	1	-1.94873	-0.149286
chr16	9160304	chr16:9160304:G:A	G	A	SNV	CTCF	jaspar2022	MA1930.1	MA1930.1	acttctcagccattaccaattcagccagcagggGgcagcaggggatcgccgtcctcggggagtctcag	0.660864	0.632789	11.0068	10.5723	weak	1	-0.434524	-0.0267303
chr19	53554523	chr19:53554523:C:G	C	G	SNV	RELB	jaspar2022	MA1117.1	MA1117.1	ccatgggtggGgggaccgact	0.618338	0.769703	5.63682	6.95777	strong	1	1.32095	0.147303
chr1	150876627	chr1:150876627:C:A	C	A	SNV	SP1	jaspar2022	MA0079.5	MA0079.5	cgccgccaCcgaaccgg	0.819897	0.703798	10.8693	9.3361	strong	1	-1.53318	-0.115732
chr12	53493005	chr12:53493005:C:G	C	G	SNV	CTCF	jaspar2022	MA1929.1	MA1929.1	gaggaaggggttacggccacagcgccccctcccGcttcccgacctccttcccggccgtcacgtggcg	0.630866	0.742892	8.88488	10.3174	strong	1	1.43253	0.105293
chr17	43766611	chr17:43766611:C:G	C	G	SNV	CTCF	jaspar2022	MA0139.1	MA0139.1	aggcagcgccacctgctgGccatcatattatggctca	0.896426	0.97688	12.3596	13.4452	strong	1	1.08561	0.0789121
chr10	11792969	chr10:11792969:A:G	A	G	SNV	CTCF	jaspar2022	MA0139.1	MA0139.1	ccttggtctagcggtaacGccagcatctgggaagacg	0.732727	0.790775	10.1507	10.934	strong	1	0.783266	0.056935
chrX	112841510	chrX:112841510:C:G	C	G	SNV	SP4	jaspar2022	MA0685.2	MA0685.2	gcgggcggGgctccgcg	0.920764	0.964082	12.0208	12.5855	weak	1	0.564695	0.0432594
chr2	131858386	chr2:131858386:C:T	C	T	SNV	CTCF	jaspar2022	MA0139.1	MA0139.1	attttccagttccaaccaCtagatgtcatgcagagac	0.85067	0.819832	11.7422	11.3261	weak	1	-0.416114	-0.030247
chr9	121594597	chr9:121594597:T:C	T	C	SNV	CTCF	jaspar2022	MA0139.1	MA0139.1	agtcagtccagcaggtggCggggttgctttttccttt	0.885414	0.943462	12.211	12.9943	strong	1	0.783266	0.056935
chr9	26145362	chr9:26145362:A:G	A	G	SNV	NFIC	jaspar2022	MA0161.2	MA0161.2	ttagtagctgGacacatgcca	0.536792	0.699409	5.31583	6.87067	strong	1	1.55484	0.159557
chr1	20480580	chr1:20480580:G:T	G	T	SNV	NFIC	jaspar2022	MA1527.1	MA1527.1	tatcagagccgacaggGcctcaaaccaacaaac	0.730977	0.617986	12.607	10.6763	strong	1	-1.93071	-0.112226
chr17	79145226	chr17:79145226:C:T	C	T	SNV	NR2F1	jaspar2022	MA0017.2	MA0017.2	ggagcctgcgcaTgtcctatccgag	0.636329	0.796812	7.73265	9.63973	strong	1	1.90708	0.158208
chr16	8682699	chr16:8682699:C:T	C	T	SNV	NFIC	jaspar2022	MA0161.2	MA0161.2	tcttggatatTagcaacttgc	0.566739	0.707894	5.60217	6.9518	strong	1	1.34964	0.138499
chr14	35385802	chr14:35385802:C:T	C	T	SNV	SP1	jaspar2022	MA0079.5	MA0079.5	tggctcccCgctgagtt	0.762099	0.640086	10.106	8.49473	strong	1	-1.61128	-0.121627
chr11	45211922	chr11:45211922:G:A	G	A	SNV	CTCF	jaspar2022	MA1929.1	MA1929.1	aaaaaaaagtgtgcagattccagcaaggccacaAgatggccccaagcaatgcagacgtggcctcaga	0.862004	0.907533	11.8405	12.4227	weak	1	0.582197	0.0427924
chr19	53538188	chr19:53538188:C:T	C	T	SNV	CTCF	jaspar2022	MA1930.1	MA1930.1	gggagtacgaggctgacgcggcggccctgtcccTgtaactgtgacacgggtgcacgcgagcgtcattg	0.570044	0.617769	9.60117	10.3398	strong	1	0.738676	0.0454406
chr12	124914621	chr12:124914621:T:C	T	C	SNV	ZNF24	jaspar2022	MA1124.1	MA1124.1	acaaacaagaacTgcgacccaaatc	0.496299	0.457137	7.95612	7.3555	weak	1	-0.600616	-0.0383018
chr4	24476401	chr4:24476401:G:T	G	T	SNV	CTCF	jaspar2022	MA1929.1	MA1929.1	aatgaggtgcattaacactctcgtaccactaggGtgtcatttagtgaatgactgctcagctctgcag	0.606861	0.536591	8.57792	7.67935	strong	1	-0.898573	-0.0660465
chr16	2090548	chr16:2090548:C:A	C	A	SNV	NR2F1	jaspar2022	MA1537.1	MA1537.1	cagcaccaacagggCctgggccacgctcc	0.615668	0.558167	11.4667	10.4013	strong	1	-1.06546	-0.0573195
chr5	115841565	chr5:115841565:C:G	C	G	SNV	SP1	jaspar2022	MA0079.5	MA0079.5	cttggagaGactcgaga	0.488564	0.58848	6.49375	7.81323	strong	1	1.31948	0.0996006
chrX	155881414	chrX:155881414:C:T	C	T	SNV	ZNF143	jaspar2022	MA0088.2	MA0088.2	ccgcgtccctccgtcCcgagcccgcgcgccc	0.59835	0.495762	11.6916	9.69685	strong	1	-1.9948	-0.102289
chr2	48560780	chr2:48560780:A:G	A	G	SNV	SP1	jaspar2022	MA0079.5	MA0079.5	aggcctctGccccaggc	0.767974	0.830726	10.1836	11.0123	strong	1	0.828693	0.0625538
chr4	154024262	chr4:154024262:A:G	A	G	SNV	CTCF	jaspar2022	MA0139.1	MA0139.1	acactgcccccactgccgGtctgtatgctccccctag	0.720384	0.799289	9.98419	11.0489	strong	1	1.06471	0.0773926
chr9	63817338	chr9:63817338:A:G	A	G	SNV	NR2F1	jaspar2022	MA1537.1	MA1537.1	ggaggagttgagccGcagaaaggagaact	0.494501	0.584403	9.2216	10.8874	strong	1	1.66582	0.0896174
chr12	131622172	chr12:131622172:T:C	T	C	SNV	OLIG2	jaspar2022	MA0678.1	MA0678.1	tacacaaggTggccttgtt	0.670297	0.621529	7.69021	7.13594	weak	1	-0.55427	-0.0484611
chr9	62802442	chr9:62802442:A:G	A	G	SNV	FOXK2	jaspar2022	MA1103.2	MA1103.2	cctagacgccAgcagcggcgc	0.484515	0.366988	4.43988	3.41339	strong	1	-1.02648	-0.114792
chr4	37982617	chr4:37982617:G:A	G	A	SNV	TBR1	jaspar2022	MA0802.1	MA0802.1	aacttgggcAtaggttggt	0.490595	0.542235	5.57551	6.14493	weak	1	0.569416	0.0508745
chr12	53054536	chr12:53054536:C:T	C	T	SNV	CTCF	jaspar2022	MA1929.1	MA1929.1	gctaatcactgacgtcaccagcggaggcgaggcCgccagggggcgggaccagagtggtggggtgggg	0.708437	0.631437	9.87682	8.89218	strong	1	-0.984641	-0.0723726
chr9	62802442	chr9:62802442:A:G	A	G	SNV	ATF7	jaspar2022	MA0834.1	MA0834.1	tggcctagacgccAgcagcggcgcctg	0.651619	0.59528	10.5904	9.6796	strong	1	-0.910754	-0.0561427
chr1	32336573	chr1:32336573:C:T	C	T	SNV	NR2F1	jaspar2022	MA1537.1	MA1537.1	acgccttggtcctgTagccgctggcagtc	0.534448	0.631414	9.96178	11.7585	strong	1	1.79671	0.0966591
chr5	65563283	chr5:65563283:T:A	T	A	SNV	CREM	jaspar2022	MA0609.2	MA0609.2	tagctgagttttgtgAcgcgccttttctgac	0.527271	0.633179	5.40505	6.42077	strong	1	1.01572	0.102197
chr19	12551043	chr19:12551043:T:C	T	C	SNV	NEUROD1	jaspar2022	MA1109.1	MA1109.1	cccgtgtcccagCacaaacaatctg	0.477912	0.53902	5.36569	6.03317	weak	1	0.667474	0.0603046
chr8	17641695	chr8:17641695:C:T	C	T	SNV	NFIC	jaspar2022	MA0161.2	MA0161.2	gctcccagcaTggaataatcc	0.580655	0.710367	5.73522	6.97545	strong	1	1.24022	0.127271
chr1	16904867	chr1:16904867:C:T	C	T	SNV	SP1	jaspar2022	MA0079.5	MA0079.5	cacttcccCcgccggct	0.7791	0.744281	10.3305	9.8707	weak	1	-0.459814	-0.034709
chr17	45580027	chr17:45580027:A:G	A	G	SNV	ZSCAN29	jaspar2022	MA1602.1	MA1602.1	tccctccctcaGtctgcctgtcc	0.489549	0.620505	6.66009	8.42013	strong	1	1.76004	0.130176
chr19	17591144	chr19:17591144:C:T	C	T	SNV	NFIC	jaspar2022	MA0161.2	MA0161.2	tggctgtgtgCcaataaaact	0.870838	0.714717	8.50977	7.01704	strong	1	-1.49273	-0.153183
chr16	3992469	chr16:3992469:T:C	T	C	SNV	CTCF	jaspar2022	MA1929.1	MA1929.1	caccccgacctccgctgcggggcgctgctgcacCgggcgtgggactttctgacctgcgaggaacccc	0.657215	0.741362	9.22183	10.2978	strong	1	1.07602	0.079089
chr19	46513644	chr19:46513644:C:T	C	T	SNV	CTCF	jaspar2022	MA0139.1	MA0139.1	gcggtcctgcagcgccccCtggtggggaacacgagcg	0.983186	0.843723	13.5303	11.6485	strong	1	-1.88185	-0.13679
chr16	10086794	chr16:10086794:A:G	A	G	SNV	NFIC	jaspar2022	MA0161.2	MA0161.2	ctaggctgccAagctctaaaa	0.998776	0.857621	9.73303	8.3834	strong	1	-1.34964	-0.138499
chr16	70152467	chr16:70152467:G:A	G	A	SNV	NFIC	jaspar2022	MA1527.1	MA1527.1	gagatggcagtgagccAagatcgcgccacttca	0.866913	0.982056	14.9298	16.8973	strong	1	1.96749	0.114363
chr7	36152824	chr7:36152824:T:C	T	C	SNV	SOX8	jaspar2022	MA0868.2	MA0868.2	ccgcgctcaTggccccgcc	0.515869	0.43538	4.73128	4.01764	strong	1	-0.713641	-0.0790845
chr19	34233214	chr19:34233214:A:C	A	C	SNV	ZBTB7B	jaspar2022	MA0694.1	MA0694.1	agcagacagcaCggaacggcagg	0.510136	0.547838	6.41599	6.87797	weak	1	0.461983	0.037201
chr3	98334189	chr3:98334189:T:C	T	C	SNV	CTCF	jaspar2022	MA1930.1	MA1930.1	gtagcctcaattatcaattacggcaaaagagggCgctgaagtacataaactctaggcttagactcctg	0.577776	0.605378	9.72084	10.1481	weak	1	0.427214	0.0262806
chr19	36973473	chr19:36973473:G:A	G	A	SNV	CTCF	jaspar2022	MA1930.1	MA1930.1	agtgtcggggcggtgcagtcgggatgggagaagGgtgtcagggccactggcccccagctcggcagagg	0.602203	0.560548	10.0989	9.45419	weak	1	-0.644727	-0.0396612
chr4	87839536	chr4:87839536:C:A	C	A	SNV	CTCF	jaspar2022	MA1930.1	MA1930.1	agttgctgtcttcgggagccggctgacacacacCctcctgtggttataagaagtactaccatttgtca	0.72477	0.64873	11.996	10.819	strong	1	-1.17691	-0.0723994
chr9	40992055	chr9:40992055:C:G	C	G	SNV	CTCF	jaspar2022	MA1929.1	MA1929.1	ccgcccccacgggaccgtcgccagcccgcagctGtagcgggaggcagttccacagcgtgcccggcag	0.63399	0.719742	8.92483	10.0214	strong	1	1.09654	0.0805973
chr9	129607471	chr9:129607471:T:G	T	G	SNV	MEF2A	jaspar2022	MA0052.4	MA0052.4	gggtgtgtggtgtgTggtgtggtgtgtgt	0.475976	0.436662	5.1487	4.74855	weak	1	-0.400145	-0.0381733
chr12	120550665	chr12:120550665:C:T	C	T	SNV	NFIC	jaspar2022	MA1527.1	MA1527.1	tgcagtggcgtgatctTggctcactgccagctc	0.881518	0.996661	15.1793	17.1468	strong	1	1.96749	0.114363
chr1	39899157	chr1:39899157:C:A	C	A	SNV	NEUROD1	jaspar2022	MA1109.1	MA1109.1	agcccctagcccAtattgggtgagc	0.593726	0.684753	6.63072	7.62498	strong	1	0.994269	0.0898297
chr1	39609786	chr1:39609786:C:T	C	T	SNV	CTCF	jaspar2022	MA0139.1	MA0139.1	ctgcagtgttcaaagcgcCctctggcggccgggagga	0.911858	0.781919	12.5679	10.8145	strong	1	-1.75334	-0.127449
chr17	68101598	chr17:68101598:C:G	C	G	SNV	NR2F2	jaspar2022	MA1111.1	MA1111.1	ggcctcaggtCcggcgtcact	0.756722	0.634371	7.87569	6.62458	strong	1	-1.2511	-0.120724
chr20	60317599	chr20:60317599:A:G	A	G	SNV	OLIG2	jaspar2022	MA0678.1	MA0678.1	aacaatgatAgattcatac	0.581691	0.51698	6.68317	5.94771	strong	1	-0.735459	-0.0643028
chr19	44113157	chr19:44113157:A:G	A	G	SNV	ZNF24	jaspar2022	MA1124.1	MA1124.1	cactggctccagAaggaggatacaa	0.522235	0.453613	8.35388	7.30145	strong	1	-1.05243	-0.0671143
chr8	83825137	chr8:83825137:C:T	C	T	SNV	CTCF	jaspar2022	MA1929.1	MA1929.1	cgttcaagtccagcctgagctaaatagcgacacCtggtggctaaaaaaatagctggctgatgtggtg	0.723535	0.671653	10.0699	9.40644	weak	1	-0.663446	-0.0487643
chr1	176905180	chr1:176905180:A:G	A	G	SNV	NFIC	jaspar2022	MA1527.1	MA1527.1	acaaagggtaaaactgGcaaactgccattactt	0.851534	0.964525	14.667	16.5977	strong	1	1.93071	0.112226
chr1	39354758	chr1:39354758:C:T	C	T	SNV	CTCF	jaspar2022	MA1929.1	MA1929.1	ttctcattcgatattgttttgttgtctgtattgCcctctagatgctaggcttgaaaacgcacactgt	0.78385	0.727254	10.8412	10.1174	strong	1	-0.72372	-0.0531945
chr5	172835839	chr5:172835839:A:T	A	T	SNV	SRF	jaspar2022	MA0083.3	MA0083.3	agccctgaggctagcAgacctaggcagtttt	0.478336	0.454848	9.25476	8.80986	weak	1	-0.444897	-0.023249
chr10	133609041	chr10:133609041:G:C	G	C	SNV	CTCF	jaspar2022	MA0139.1	MA0139.1	aattaaacgccatctagaGggcagagaggaaaatctc	0.878181	0.739269	12.1134	10.239	strong	1	-1.87442	-0.13625
chr3	123120152	chr3:123120152:T:G	T	G	SNV	OLIG2	jaspar2022	MA0678.1	MA0678.1	ctgagccttTgagctttgc	0.625315	0.508679	7.17897	5.85336	strong	1	-1.32561	-0.115901
chr2	119476327	chr2:119476327:G:C	G	C	SNV	CTCF	jaspar2022	MA1930.1	MA1930.1	cctgtgctcttgggccacccacccccaggctggCtatgaacaacgtggcccccaccaccctggaggga	0.748714	0.780627	12.3665	12.8605	weak	1	0.493939	0.0303853
chr9	19408828	chr9:19408828:C:A	C	A	SNV	SP1	jaspar2022	MA0079.5	MA0079.5	gacccctcCtccacgcg	0.81255	0.664987	10.7723	8.82356	strong	1	-1.94869	-0.147097
chr9	137036493	chr9:137036493:G:A	G	A	SNV	NFIC	jaspar2022	MA1527.1	MA1527.1	tctgaattggccagggGccaatgaaagccaaaa	0.959638	0.861705	16.5142	14.8408	strong	1	-1.67342	-0.0972698
chr5	134971200	chr5:134971200:C:T	C	T	SNV	SRF	jaspar2022	MA0083.3	MA0083.3	gtgatccgccctcctTggcctcccagagtgc	0.524414	0.59746	10.1276	11.5112	strong	1	1.38365	0.0723057
chr12	53493005	chr12:53493005:C:G	C	G	SNV	CTCF	jaspar2022	MA1930.1	MA1930.1	gaggaaggggttacggccacagcgccccctcccGcttcccgacctccttcccggccgtcacgtggcgc	0.591864	0.691042	9.9389	11.4739	strong	1	1.53503	0.0944292
chr13	97224169	chr13:97224169:G:C	G	C	SNV	CTCF	jaspar2022	MA1930.1	MA1930.1	gcaaagctttttttctggcctgactcccccttgCtgcagcccagcgctgccacctgggtggatggtcc	0.635117	0.692496	10.6083	11.4964	strong	1	0.88809	0.054632
chr4	28536311	chr4:28536311:G:T	G	T	SNV	NFIC	jaspar2022	MA1527.1	MA1527.1	caaataatctaatgttGgctgaatgccaacaat	0.99793	0.881145	17.1685	15.173	strong	1	-1.99554	-0.115994
chr2	223725779	chr2:223725779:G:A	G	A	SNV	NR2F2	jaspar2022	MA1111.1	MA1111.1	ttctttcagaAgagtaggaag	0.482378	0.554886	5.07036	5.8118	strong	1	0.741442	0.0715446
chr11	19727446	chr11:19727446:G:A	G	A	SNV	ZNF143	jaspar2022	MA0088.2	MA0088.2	gcatcattctagcatGtggttatgtaggagg	0.548398	0.52504	10.7203	10.2661	weak	1	-0.454191	-0.0232899
chr6	52063694	chr6:52063694:A:C	A	C	SNV	CTCF	jaspar2022	MA1930.1	MA1930.1	cacaatgtctagcagccttcccagcctcagcccActagatgtcagtatcatcaccaccaccaccactt	0.829792	0.793731	13.6214	13.0633	weak	1	-0.558151	-0.0343354
chr5	9835045	chr5:9835045:T:C	T	C	SNV	CTCF	jaspar2022	MA1930.1	MA1930.1	caacaggttagaaattgattgtctgccgaccccTaggggcacggcagcagctcagctttcaacatctg	0.767062	0.709718	12.6505	11.763	strong	1	-0.887545	-0.0545985
chr17	7932247	chr17:7932247:A:G	A	G	SNV	REST	jaspar2022	MA0138.2	MA0138.2	acggttttgagcgtagggggAggcgtgagagggggatctca	0.511261	0.487195	10.6184	10.139	weak	1	-0.479407	-0.0235529
chr1	16056223	chr1:16056223:T:C	T	C	SNV	NR3C1	jaspar2022	MA0113.3	MA0113.3	gatattaggtcctgttCacctgcggccccgccc	0.519783	0.619853	8.99801	10.7069	strong	1	1.70889	0.0993621
chr17	33199026	chr17:33199026:G:A	G	A	SNV	NFIC	jaspar2022	MA0161.2	MA0161.2	tatttttctgGcatcacgcca	0.725945	0.569824	7.12439	5.63166	strong	1	-1.49273	-0.153183
chr11	2732716	chr11:2732716:C:G	C	G	SNV	RELB	jaspar2022	MA1117.1	MA1117.1	cctcaccgggGcggcgcacac	0.560462	0.61017	5.13173	5.56554	weak	1	0.433804	0.0483748
chr10	30752051	chr10:30752051:A:G	A	G	SNV	CTCF	jaspar2022	MA1930.1	MA1930.1	ctgcatgccatagagacaggccaccagcagaggGggccgcaggctcggacagagagctggggctgtgc	0.823236	0.875701	13.52	14.332	strong	1	0.812034	0.0499533
chr19	17226216	chr19:17226216:C:T	C	T	SNV	NR2F2	jaspar2022	MA1111.1	MA1111.1	ccctgctgagTgaccccgcca	0.620038	0.774417	6.47802	8.05663	strong	1	1.57861	0.152327
chr14	64801183	chr14:64801183:C:T	C	T	SNV	ZEB1	jaspar2022	MA0103.3	MA0103.3	ttgcccagcaCctgggccggc	0.99314	0.814535	10.3719	8.52159	strong	1	-1.85028	-0.17718
chr15	59819243	chr15:59819243:G:T	G	T	SNV	CTCF	jaspar2022	MA1929.1	MA1929.1	ctttccctcgacccctacccctgccacagtgtgGcagcctgtcactagacttcatcttcacatggca	0.608517	0.574347	8.5991	8.16215	weak	1	-0.436947	-0.0321163
chr3	157175255	chr3:157175255:C:T	C	T	SNV	MAZ	jaspar2022	MA1522.1	MA1522.1	gcgagcttgaCtcttcctggg	0.714631	0.571417	9.58817	7.68336	strong	1	-1.90481	-0.142323
chr12	77925752	chr12:77925752:A:G	A	G	SNV	NFIC	jaspar2022	MA1527.1	MA1527.1	atgtcactggagagacGccaactgcagaaagct	0.750037	0.847871	12.9327	14.6044	strong	1	1.67172	0.0971709
chr7	351877	chr7:351877:C:T	C	T	SNV	CTCF	jaspar2022	MA1930.1	MA1930.1	cagccttcagaagcacgtgaaagcaatgcccccTgctgctcacacccattacgggctccctcttcctc	0.720156	0.7775	11.9245	12.8121	strong	1	0.887545	0.0545985
chr9	135961478	chr9:135961478:C:T	C	T	SNV	EGR1	jaspar2022	MA0162.4	MA0162.4	ggcgcgctgtggcCaccgcaaaggaag	0.638841	0.594801	6.66685	6.22849	weak	1	-0.438361	-0.0427178
chr13	20489385	chr13:20489385:A:G	A	G	SNV	CTCF	jaspar2022	MA0139.1	MA0139.1	cacctgaatgtgcatggcGccctctactgcttcttgg	0.808602	0.866649	11.1746	11.9578	strong	1	0.783266	0.056935
chr2	84971016	chr2:84971016:C:T	C	T	SNV	NEUROD1	jaspar2022	MA1109.1	MA1109.1	aggcggggctggTgtgcgggcggcg	0.573265	0.624515	6.40722	6.96702	weak	1	0.5598	0.0505765
chr20	38926138	chr20:38926138:G:T	G	T	SNV	SP4	jaspar2022	MA0685.2	MA0685.2	accggcagGgggcgcgc	0.775973	0.714219	10.1333	9.32821	strong	1	-0.805038	-0.0616712
chr6	170147089	chr6:170147089:G:A	G	A	SNV	RELB	jaspar2022	MA1117.1	MA1117.1	gatccggacaAatgagggcca	0.468843	0.577329	4.33218	5.27894	strong	1	0.946754	0.105576
chr19	12766150	chr19:12766150:G:C	G	C	SNV	CTCF	jaspar2022	MA0139.1	MA0139.1	gcggttggcatcctccagGtggcgctgcagctcctcc	0.915629	0.87234	12.6187	12.0346	weak	1	-0.584116	-0.0424589
chr11	129750968	chr11:129750968:T:C	T	C	SNV	CTCF	jaspar2022	MA1929.1	MA1929.1	aggcggcggccgcgcgcccgggagccacgcttcTccggcggaacgcggcgccccctggcggcagaac	0.703236	0.656538	9.81031	9.21316	weak	1	-0.597148	-0.0438913
chr2	197453301	chr2:197453301:A:C	A	C	SNV	NR2F1	jaspar2022	MA1537.1	MA1537.1	cgcgagcgcacgggCaaagcgattggtcg	0.57612	0.607876	10.7339	11.3224	weak	1	0.588419	0.0316556
chr9	37433962	chr9:37433962:C:A	C	A	SNV	NFIC	jaspar2022	MA1527.1	MA1527.1	tctcccgtccctccccCaccccagcctgcaagg	0.600569	0.51419	10.3787	8.90267	strong	1	-1.47599	-0.0857939
chr6	160006479	chr6:160006479:A:T	A	T	SNV	REST	jaspar2022	MA0138.2	MA0138.2	gagctgtccacgaggcactgTccttggtttcagagcctctg	0.712064	0.766676	14.6186	15.7065	strong	1	1.08792	0.0534488
chrX	119871742	chrX:119871742:C:G	C	G	SNV	ZNF24	jaspar2022	MA1124.1	MA1124.1	gactgcgagagcGcgagcgcccgtc	0.497575	0.530689	7.97568	8.48354	weak	1	0.507852	0.0323862
chr8	144147167	chr8:144147167:T:C	T	C	SNV	CTCF	jaspar2022	MA0139.1	MA0139.1	cagactcaggcctgccccTggcggaggggctggcgtt	0.781802	0.694775	10.8129	9.63864	strong	1	-1.17429	-0.0853584
chr15	44296238	chr15:44296238:A:C	A	C	SNV	NFIC	jaspar2022	MA1527.1	MA1527.1	aaacttggattcttgcCaactgtagctcatact	0.789726	0.905308	13.6109	15.5858	strong	1	1.97499	0.114799
chrX	135052279	chrX:135052279:A:G	A	G	SNV	SP1	jaspar2022	MA0079.5	MA0079.5	ttgtggtcGctagtgcg	0.418051	0.537412	5.56258	7.13884	strong	1	1.57626	0.118984
chr19	7788830	chr19:7788830:C:G	C	G	SNV	MAZ	jaspar2022	MA1522.1	MA1522.1	agaccacgagGgcggagcttg	0.580753	0.723582	7.80753	9.70722	strong	1	1.89968	0.14194
chr12	13135912	chr12:13135912:G:C	G	C	SNV	CTCF	jaspar2022	MA1929.1	MA1929.1	ctgtgggagagctcctccgggcacccacgcctcCctgcggactggctgaggagtgactcaagtacca	0.590989	0.707681	8.37497	9.86716	strong	1	1.49219	0.109678
chr5	14581689	chr5:14581689:C:G	C	G	SNV	SP4	jaspar2022	MA0685.2	MA0685.2	aggccccgCccctctag	1	0.850513	13.0537	11.105	strong	1	-1.94873	-0.149286
chr3	118706049	chr3:118706049:A:C	A	C	SNV	CTCF	jaspar2022	MA0139.1	MA0139.1	atccctccaggctgccccCtaatggactatgacttct	0.785054	0.924827	10.8568	12.7429	strong	1	1.88604	0.137095
chr17	11297195	chr17:11297195:C:T	C	T	SNV	CTCF	jaspar2022	MA1929.1	MA1929.1	gacaccagatcatgcgtgtttgccatagagctcCatctagtggagagtaagagtttggagatggaga	0.702268	0.592523	9.79793	8.39458	strong	1	-1.40335	-0.103148
chr17	7932247	chr17:7932247:A:G	A	G	SNV	ZBTB7B	jaspar2022	MA0694.1	MA0694.1	agcgtagggggGggcgtgagagg	0.770564	0.824407	9.60715	10.2669	weak	1	0.65977	0.0531277
chr4	157151286	chr4:157151286:A:G	A	G	SNV	NFIC	jaspar2022	MA1527.1	MA1527.1	aaattaacttagaatgGcagtttgccaagttaa	0.868935	0.981926	14.9643	16.895	strong	1	1.93071	0.112226
chr6	53294292	chr6:53294292:G:T	G	T	SNV	CTCF	jaspar2022	MA1929.1	MA1929.1	tcctaaccccctctggtggctggttcaggcaggGgcatgtgaagcaattgtggccagtgagttttga	0.736944	0.675289	10.2413	9.45294	strong	1	-0.788404	-0.0579489
chr13	31625208	chr13:31625208:G:A	G	A	SNV	NFIC	jaspar2022	MA1527.1	MA1527.1	cttgcaaagccagatgGctctgtgccaggcagt	0.966423	0.850677	16.6301	14.6523	strong	1	-1.97779	-0.114962
chr11	5992846	chr11:5992846:C:T	C	T	SNV	CTCF	jaspar2022	MA0139.1	MA0139.1	cgaagcttcccactccacCtagtagccacaatctcct	0.76699	0.627527	10.6131	8.73123	strong	1	-1.88185	-0.13679
chr12	82910650	chr12:82910650:C:T	C	T	SNV	NEUROD1	jaspar2022	MA1109.1	MA1109.1	gctcttagcagaTggagggccagaa	0.84544	0.981561	9.38014	10.867	strong	1	1.48682	0.134331
chr11	64653029	chr11:64653029:T:A	T	A	SNV	SRF	jaspar2022	MA0083.3	MA0083.3	ggcctaccacgtgcaTgtgctcccccatgtg	0.496868	0.438498	9.60581	8.50016	strong	1	-1.10565	-0.057778
chr21	29073640	chr21:29073640:G:A	G	A	SNV	SP4	jaspar2022	MA0685.2	MA0685.2	ccgcggagGaagcgagg	0.638017	0.56215	8.33484	7.34583	strong	1	-0.989014	-0.075765
chr1	107670227	chr1:107670227:T:G	T	G	SNV	NFIC	jaspar2022	MA1527.1	MA1527.1	atcactgctggctcttTgccagctatttcgtgc	0.972437	0.937022	16.7329	16.1277	weak	1	-0.605153	-0.0351754
chr19	48993574	chr19:48993574:A:G	A	G	SNV	SP4	jaspar2022	MA0685.2	MA0685.2	ggaggaggGgggtggga	0.787504	0.86987	10.2836	11.3573	strong	1	1.07373	0.0822549
chr9	63817506	chr9:63817506:C:T	C	T	SNV	MAZ	jaspar2022	MA1522.1	MA1522.1	gtagacagccCacctccctgt	0.866735	0.723521	11.6112	9.70641	strong	1	-1.90481	-0.142323
chr19	53538188	chr19:53538188:C:T	C	T	SNV	ZNF143	jaspar2022	MA0088.2	MA0088.2	cggcggccctgtcccCgtaactgtgacacgg	0.459845	0.43405	8.99845	8.49686	weak	1	-0.501588	-0.0257203
chr1	232736211	chr1:232736211:A:G	A	G	SNV	NFIC	jaspar2022	MA1527.1	MA1527.1	ccaggaggtagagctgGcagtgagccaagatca	0.88367	0.996661	15.2161	17.1468	strong	1	1.93071	0.112226
chr16	87543915	chr16:87543915:C:T	C	T	SNV	CTCF	jaspar2022	MA0139.1	MA0139.1	gtgctggcacagattccaCgatctgaggcctcctgac	0.632169	0.601331	8.79386	8.37774	weak	1	-0.416114	-0.030247
chr19	18374448	chr19:18374448:A:G	A	G	SNV	SP1	jaspar2022	MA0079.5	MA0079.5	gcgtgaagGgggaggcc	0.721109	0.843122	9.5647	11.176	strong	1	1.61128	0.121627
chr12	130908452	chr12:130908452:A:G	A	G	SNV	NFIC	jaspar2022	MA1527.1	MA1527.1	ttcctggatctttgccAaaatgtctctcactaa	0.880346	0.763561	15.1593	13.1638	strong	1	-1.99554	-0.115994
chr15	74839539	chr15:74839539:G:A	G	A	SNV	SRF	jaspar2022	MA0083.3	MA0083.3	cctcagcccaccccaGccccagccgtctgct	0.433071	0.408096	8.39736	7.92428	weak	1	-0.47308	-0.0247217
chr10	65907452	chr10:65907452:C:T	C	T	SNV	NFIC	jaspar2022	MA0161.2	MA0161.2	aagctcctgcCgattcttcgg	0.729549	0.566932	7.15885	5.60401	strong	1	-1.55484	-0.159557
chr19	56839696	chr19:56839696:A:G	A	G	SNV	NFIC	jaspar2022	MA0161.2	MA0161.2	tggggctggaAcagaccatta	0.582377	0.474803	5.75168	4.72314	strong	1	-1.02855	-0.105549
chr19	46579780	chr19:46579780:C:T	C	T	SNV	CTCF	jaspar2022	MA0139.1	MA0139.1	ttcacttcatcagagcgcCcactggtgggtaatgaga	0.938952	0.809013	12.9334	11.1801	strong	1	-1.75334	-0.127449
chr21	38907334	chr21:38907334:C:T	C	T	SNV	CREB1	jaspar2022	MA0018.4	MA0018.4	aggcagtgcacaTgtcagcagccct	0.67686	0.768573	7.05685	7.97895	strong	1	0.9221	0.0894744
chr19	36973405	chr19:36973405:G:A	G	A	SNV	CTCF	jaspar2022	MA0139.1	MA0139.1	gcccacgcttcaccgctaGgggaggtcagggctgtgc	0.777123	0.67416	10.7498	9.36046	strong	1	-1.38935	-0.10099
chr17	5419805	chr17:5419805:C:A	C	A	SNV	SP1	jaspar2022	MA0079.5	MA0079.5	gaggccagCccaccaag	0.672693	0.555683	8.92533	7.38011	strong	1	-1.54521	-0.11664
chr19	34233214	chr19:34233214:A:C	A	C	SNV	ZNF24	jaspar2022	MA1124.1	MA1124.1	gagcagacagcaAggaacggcaggg	0.566354	0.50613	9.03052	8.10689	strong	1	-0.923625	-0.0589004
chr22	41286010	chr22:41286010:G:T	G	T	SNV	CTCF	jaspar2022	MA1930.1	MA1930.1	tgactctaccgtaaacaggcggcgccgccgcgtGgggggaatcgagcgcgcgcctccgccctctgggg	0.696158	0.580101	11.5531	9.75684	strong	1	-1.79628	-0.110501
chr15	89560152	chr15:89560152:T:C	T	C	SNV	NFIC	jaspar2022	MA1527.1	MA1527.1	ggcagaggaggcctggCggagagccaggacttt	0.841023	0.938591	14.4874	16.1546	strong	1	1.66718	0.0969074
chr8	13655257	chr8:13655257:C:T	C	T	SNV	CTCF	jaspar2022	MA0139.1	MA0139.1	aaatgagacattgccctcTagaggtcttctaaaagaa	0.787578	0.879784	10.8909	12.1351	strong	1	1.24419	0.0904394
chr4	161320590	chr4:161320590:G:A	G	A	SNV	CTCF	jaspar2022	MA0139.1	MA0139.1	agcaggtggagccctttaGgccatttcaggtgacaat	0.649735	0.570711	9.03088	7.96457	strong	1	-1.06632	-0.0775096
chr5	80013845	chr5:80013845:T:A	T	A	SNV	NFIC	jaspar2022	MA1527.1	MA1527.1	ttcttggcatagggccAaaaacgtagtaagcac	0.881865	0.997008	15.1853	17.1527	strong	1	1.96749	0.114363
chr2	233854580	chr2:233854580:C:T	C	T	SNV	SP1	jaspar2022	MA0079.5	MA0079.5	tccgccctCcctgcctt	0.757145	0.609582	10.0406	8.0919	strong	1	-1.94869	-0.147097
chrX	119871742	chrX:119871742:C:G	C	G	SNV	SP1	jaspar2022	MA0079.5	MA0079.5	gcgagagcCcgagcgcc	0.607668	0.564948	8.06662	7.50248	weak	1	-0.564147	-0.0425846
chr17	7932247	chr17:7932247:A:G	A	G	SNV	NR2F2	jaspar2022	MA1111.1	MA1111.1	gcgtagggggAggcgtgagag	0.564044	0.497202	5.90544	5.22194	weak	1	-0.683501	-0.0659536
chr20	49612399	chr20:49612399:G:C	G	C	SNV	NR3C1	jaspar2022	MA0113.3	MA0113.3	cggaagcccaaggctgGtccctcttgtcaactc	0.620477	0.506294	10.7176	8.76766	strong	1	-1.9499	-0.113375
chr7	66413607	chr7:66413607:G:A	G	A	SNV	KLF5	jaspar2022	MA0599.1	MA0599.1	gcgggggagGggggcctgg	0.983377	0.928553	11.2911	10.6635	weak	1	-0.627576	-0.0546605
chr10	11792969	chr10:11792969:A:G	A	G	SNV	CTCF	jaspar2022	MA1929.1	MA1929.1	ggccaccagagggctccttggtctagcggtaacGccagcatctgggaagacgcccgttgccaagcgg	0.679746	0.711268	9.50994	9.91302	weak	1	0.403086	0.0296274
chr17	41810119	chr17:41810119:T:G	T	G	SNV	MAZ	jaspar2022	MA1522.1	MA1522.1	gagcagcaggGgaggtccaga	0.70434	0.835102	9.45129	11.1905	strong	1	1.73918	0.129948
chr3	157662393	chr3:157662393:C:T	C	T	SNV	ZNF24	jaspar2022	MA1124.1	MA1124.1	acaatgtgttcaTtcagatagctcc	0.683544	0.783625	10.8278	12.3627	strong	1	1.5349	0.0978817
chr19	53538188	chr19:53538188:C:T	C	T	SNV	CLOCK	jaspar2022	MA0819.2	MA0819.2	ccctgtcccCgtaactgtg	0.632761	0.553988	6.1884	5.42531	strong	1	-0.76309	-0.0782985
chr18	52409952	chr18:52409952:G:A	G	A	SNV	CTCF	jaspar2022	MA1930.1	MA1930.1	tcactgttgctcttttaagggcaccctctggtgGttctctcagtgtcaagtgagtgtgaacactgctc	0.703098	0.656328	11.6605	10.9366	strong	1	-0.723884	-0.0445307
chr18	37570563	chr18:37570563:G:A	G	A	SNV	CTCF	jaspar2022	MA0139.1	MA0139.1	tgcccagacctgcagaggGcagtgagggcaggctgga	0.880373	0.809901	12.143	11.1921	strong	1	-0.950917	-0.0691214
chr8	19929041	chr8:19929041:A:C	A	C	SNV	CTCF	jaspar2022	MA0139.1	MA0139.1	aaactcatcttctgctaaCtggggctaagctcgtttt	0.615765	0.645442	8.57251	8.97296	weak	1	0.400446	0.0291081
chr1	45500031	chr1:45500031:G:T	G	T	SNV	CTCF	jaspar2022	MA1930.1	MA1930.1	actggctgccgcagcgccacctgggaaactgagGtcgcctcttgcgaacacaaccggcgatggaggcg	0.651798	0.618071	10.8665	10.3445	weak	1	-0.522022	-0.0321128
chr12	109130476	chr12:109130476:G:A	G	A	SNV	NFIC	jaspar2022	MA0161.2	MA0161.2	gcctggagccAgggatcttgg	0.605314	0.746469	5.97099	7.32063	strong	1	1.34964	0.138499
chr5	55307994	chr5:55307994:T:C	T	C	SNV	EGR1	jaspar2022	MA0162.4	MA0162.4	taggagggagattCgctctcactgctc	0.688266	0.765317	7.15882	7.92578	strong	1	0.766954	0.0747388
chr12	31117215	chr12:31117215:G:C	G	C	SNV	CTCF	jaspar2022	MA1930.1	MA1930.1	gttttgattcttagagaagagcccctcttccccCcctggctcttaggatccccattgcagggcgggga	0.64081	0.672005	10.6965	11.1793	weak	1	0.482827	0.0297018
chr17	15699586	chr17:15699586:T:G	T	G	SNV	NFIC	jaspar2022	MA0161.2	MA0161.2	tcttcgatcgGccgattctcc	0.476048	0.618695	4.73503	6.09893	strong	1	1.3639	0.139963
chr5	102562341	chr5:102562341:C:A	C	A	SNV	CTCF	jaspar2022	MA1930.1	MA1930.1	cctgtagaaaagtcaagcctgaacgtacagcgcCgtctagtggcaacaggaggcagacacctagtggg	0.771652	0.667487	12.7216	11.1094	strong	1	-1.61223	-0.0991786
chr9	63817506	chr9:63817506:C:T	C	T	SNV	NEUROD1	jaspar2022	MA1109.1	MA1109.1	cagtagacagccCacctccctgtac	0.711493	0.587449	7.91707	6.56215	strong	1	-1.35491	-0.122413
chr2	127077216	chr2:127077216:C:T	C	T	SNV	SRF	jaspar2022	MA0083.3	MA0083.3	gaacaaggagggcagCgagcggtggccagga	0.458519	0.421517	8.8794	8.1785	strong	1	-0.700902	-0.0366271
chr7	54759235	chr7:54759235:C:T	C	T	SNV	REST	jaspar2022	MA0138.2	MA0138.2	ggcccaccggaaccggaatcCgggtttctgccaacagcccg	0.614113	0.531299	12.6673	11.0176	strong	1	-1.64973	-0.08105
chr2	29281720	chr2:29281720:C:G	C	G	SNV	SP1	jaspar2022	MA0079.5	MA0079.5	agactcagGggggatct	0.681894	0.712266	9.04684	9.44792	weak	1	0.401084	0.0302758
chr22	28918208	chr22:28918208:T:C	T	C	SNV	RELB	jaspar2022	MA1117.1	MA1117.1	ccagcggcccCtttagggtta	0.47665	0.61472	4.40031	5.60524	strong	1	1.20493	0.134366
chr6	5261227	chr6:5261227:A:C	A	C	SNV	CTCF	jaspar2022	MA0139.1	MA0139.1	ggcagcgccccttcctacCtccaggaggccgcgttgc	0.781696	0.863321	10.8115	11.9129	strong	1	1.10141	0.0800607
chr7	77536663	chr7:77536663:G:A	G	A	SNV	NEUROD1	jaspar2022	MA1109.1	MA1109.1	agcctgcctcccAcccgcccccact	0.577489	0.71151	6.45336	7.91725	strong	1	1.46389	0.132259
chr5	180313827	chr5:180313827:T:C	T	C	SNV	RELB	jaspar2022	MA1117.1	MA1117.1	gccacgccgaTctccggccct	0.603534	0.47448	5.50762	4.38137	strong	1	-1.12625	-0.125591
chr3	60125950	chr3:60125950:A:G	A	G	SNV	SOX8	jaspar2022	MA0868.2	MA0868.2	gctccttcaAatctcttcc	0.602603	0.512349	5.5003	4.70008	strong	1	-0.800222	-0.0886793
chr8	55568683	chr8:55568683:G:A	G	A	SNV	RELB	jaspar2022	MA1117.1	MA1117.1	gccaaagccaGggcagcagac	0.632024	0.478695	5.75625	4.41816	strong	1	-1.33809	-0.149215
chr9	35658023	chr9:35658023:C:T	C	T	SNV	CREB1	jaspar2022	MA0018.4	MA0018.4	cacgaaccacgtCctcagcttcaca	0.699271	0.570396	7.28217	5.98645	strong	1	-1.29572	-0.125728
chrX	155767377	chrX:155767377:T:C	T	C	SNV	NFIC	jaspar2022	MA1527.1	MA1527.1	ctgccaactcactcccTgcccccactgcagatt	0.615691	0.58533	10.6371	10.1183	weak	1	-0.518802	-0.0301561
chr12	108731564	chr12:108731564:C:A	C	A	SNV	MAZ	jaspar2022	MA1522.1	MA1522.1	accgcccccgCcaccgcgcgt	0.83781	0.706051	11.2265	9.47405	strong	1	-1.75245	-0.130939
chr1	110538385	chr1:110538385:G:A	G	A	SNV	CTCF	jaspar2022	MA1929.1	MA1929.1	ccggctcctggccccgtggtaatggcgcctcctGcctgttgagtttgtttccaaagggctgcaggga	0.675371	0.602707	9.45399	8.5248	strong	1	-0.929189	-0.0682968
chr4	19599037	chr4:19599037:C:T	C	T	SNV	CTCF	jaspar2022	MA0139.1	MA0139.1	aaagcttacatctccatcTggaggtcaattcactaga	0.736189	0.838864	10.1975	11.5829	strong	1	1.38544	0.100706
chr11	397921	chr11:397921:G:C	G	C	SNV	NR2F1	jaspar2022	MA1538.1	MA1538.1	cctgcgtcacctccCtacccccacatata	0.605708	0.673043	9.9449	11.0326	strong	1	1.08774	0.0666739
chr13	98464130	chr13:98464130:T:C	T	C	SNV	NR2F1	jaspar2022	MA1538.1	MA1538.1	taagagagcttaaaTgatctggtcgggcg	0.600919	0.536201	9.86754	8.82208	strong	1	-1.04546	-0.0640822
chr7	1170052	chr7:1170052:T:A	T	A	SNV	NR2F2	jaspar2022	MA1111.1	MA1111.1	ccctggcagcTccccctggcg	0.591356	0.495359	6.18473	5.2031	strong	1	-0.981626	-0.0947209
chrX	15335567	chrX:15335567:T:C	T	C	SNV	FOXK2	jaspar2022	MA1103.2	MA1103.2	tccctgctgtTccgcagcacc	0.568062	0.485612	5.16957	4.44946	strong	1	-0.720118	-0.0805311
chr12	53048612	chr12:53048612:C:T	C	T	SNV	SOX8	jaspar2022	MA0868.2	MA0868.2	gctcctctcTagttacagg	0.512466	0.648968	4.70111	5.91139	strong	1	1.21028	0.134121
chr15	66152096	chr15:66152096:A:G	A	G	SNV	CTCF	jaspar2022	MA1929.1	MA1929.1	tacttcctgggttttcattccaggagctctagcGccaccttgcccacctgctcttccagctctcagc	0.532371	0.616145	7.62539	8.69665	strong	1	1.07126	0.0787391
chr5	55307994	chr5:55307994:T:C	T	C	SNV	CTCF	jaspar2022	MA1930.1	MA1930.1	cggtcgcggggcatcgtgggtaggagggagattTgctctcactgctcccaaaaatggcggacgcattc	0.634575	0.599182	10.6	10.0522	weak	1	-0.547797	-0.0336984
chr3	63015745	chr3:63015745:A:G	A	G	SNV	SP1	jaspar2022	MA0079.5	MA0079.5	tacagctaGagatggct	0.403117	0.52513	5.36536	6.97664	strong	1	1.61128	0.121627
chr2	201082350	chr2:201082350:T:G	T	G	SNV	NR2F1	jaspar2022	MA0017.2	MA0017.2	cattgcagcctcGacctcgtgggct	0.596118	0.764393	7.2548	9.25447	strong	1	1.99967	0.165889
chr4	139295856	chr4:139295856:G:C	G	C	SNV	CTCF	jaspar2022	MA1929.1	MA1929.1	ccgagttggcaacagaaccagcgccacctggcgGccggaagtgcgggactcgagggctctgcagcag	0.73771	0.681494	10.2511	9.53228	strong	1	-0.718856	-0.052837
chr5	1799910	chr5:1799910:T:G	T	G	SNV	NFIB	jaspar2022	MA1643.1	MA1643.1	cgtggcgtgcccacgtccagGgcggggcgcagagacgcagc	0.601936	0.629165	10.1947	10.6392	weak	1	0.444512	0.0266288
chr1	39899157	chr1:39899157:C:A	C	A	SNV	SP1	jaspar2022	MA0079.5	MA0079.5	cctagcccCtattgggt	0.745358	0.629259	9.88493	8.35175	strong	1	-1.53318	-0.115732
chr6	56279560	chr6:56279560:T:C	T	C	SNV	ZNF24	jaspar2022	MA1124.1	MA1124.1	attccattccaaCtgtcagatttga	0.590287	0.626196	9.39756	9.94828	weak	1	0.550719	0.0351198
chr1	39899157	chr1:39899157:C:A	C	A	SNV	MAZ	jaspar2022	MA1522.1	MA1522.1	cccctagcccCtattgggtga	0.692549	0.586833	9.29447	7.8884	strong	1	-1.40607	-0.105058
chr3	42185285	chr3:42185285:T:C	T	C	SNV	NR2F2	jaspar2022	MA1111.1	MA1111.1	aggaaagtggTgactcacatt	0.652062	0.56293	6.80548	5.89405	strong	1	-0.911428	-0.0879472
chr7	152676167	chr7:152676167:C:G	C	G	SNV	SP1	jaspar2022	MA0079.5	MA0079.5	agtcaaacCcgcccacc	0.799449	0.757145	10.5992	10.0406	weak	1	-0.558653	-0.0421699
chrX	23667305	chrX:23667305:A:G	A	G	SNV	NR3C1	jaspar2022	MA0113.3	MA0113.3	gcgcggaggtcaggagAccttgtcgctgccttc	0.72797	0.632914	12.5532	10.9299	strong	1	-1.62325	-0.0943827
chr22	47968043	chr22:47968043:C:T	C	T	SNV	NFIB	jaspar2022	MA1643.1	MA1643.1	actgtctgccacctggtgctTggctaggacccagtgctggg	0.737435	0.813123	12.4066	13.6422	strong	1	1.23558	0.0740183
chrX	155864845	chrX:155864845:C:T	C	T	SNV	CTCF	jaspar2022	MA1930.1	MA1930.1	tgttttcttctcaggagtccacattctattactCcccttggtgtctatctgtggtattgcagaacgag	0.721129	0.618412	11.9396	10.3498	strong	1	-1.5898	-0.0977989
chr14	39103614	chr14:39103614:C:G	C	G	SNV	SP4	jaspar2022	MA0685.2	MA0685.2	gacggcctCcaggacat	0.608658	0.50331	7.9521	6.57878	strong	1	-1.37332	-0.105206
chr11	47412337	chr11:47412337:C:A	C	A	SNV	NEUROD1	jaspar2022	MA1109.1	MA1109.1	tggcattgccgcCccctgcaggtgg	0.735172	0.57756	8.1757	6.45414	strong	1	-1.72156	-0.155539
chr3	52498275	chr3:52498275:G:C	G	C	SNV	SP1	jaspar2022	MA0079.5	MA0079.5	tggggttgGgggggaga	0.915537	0.767974	12.1323	10.1836	strong	1	-1.94869	-0.147097
chr4	77203792	chr4:77203792:C:T	C	T	SNV	CTCF	jaspar2022	MA0139.1	MA0139.1	ttttatggttactaagcgCcccctgttgatggcagtt	0.872703	0.802231	12.0395	11.0886	strong	1	-0.950917	-0.0691214
chr19	34233214	chr19:34233214:A:C	A	C	SNV	CLOCK	jaspar2022	MA0819.2	MA0819.2	cagacagcaCggaacggca	0.484924	0.617338	4.75627	6.03899	strong	1	1.28272	0.131616
chr17	28747547	chr17:28747547:G:C	G	C	SNV	CTCF	jaspar2022	MA1929.1	MA1929.1	ctccccttccggtggcaagccagacctgtggctGagggccagtatccctccaccaggggaaaggaag	0.759747	0.654109	10.5329	9.1821	strong	1	-1.35084	-0.0992889
chr4	37802272	chr4:37802272:A:G	A	G	SNV	CTCF	jaspar2022	MA0139.1	MA0139.1	gctctgtttccctgactcAgaaggaagcatttttcca	0.687244	0.628536	9.53702	8.74484	strong	1	-0.792178	-0.0575828
chr9	40992220	chr9:40992220:C:T	C	T	SNV	GATA4	jaspar2022	MA0482.2	MA0482.2	tctgcagccgcCatagctcccca	0.678621	0.585454	6.7973	5.89414	strong	1	-0.903158	-0.0911109
chr21	10673943	chr21:10673943:T:C	T	C	SNV	NR3C1	jaspar2022	MA0113.3	MA0113.3	attcgagtccatttcgTtccaatcccttccatt	0.769438	0.653649	13.2614	11.284	strong	1	-1.97733	-0.11497
chr1	43565822	chr1:43565822:A:G	A	G	SNV	NFIB	jaspar2022	MA1643.1	MA1643.1	ggggcgggaagggcggtgccAgggcggacagcggacgcgcg	0.631936	0.597986	10.6844	10.1302	weak	1	-0.554227	-0.0332014
chr1	143195063	chr1:143195063:C:A	C	A	SNV	MEIS2	jaspar2022	MA0774.1	MA0774.1	gaatcatAgaatgga	0.46874	0.587285	4.83036	6.02226	strong	1	1.1919	0.117176
chr7	100867266	chr7:100867266:C:T	C	T	SNV	CLOCK	jaspar2022	MA0819.2	MA0819.2	gggggctgaCtcagggaga	0.530388	0.485842	5.19668	4.76517	weak	1	-0.431517	-0.0442768
chrX	349473	chrX:349473:A:G	A	G	SNV	SOX8	jaspar2022	MA0868.2	MA0868.2	gtgctgggaAcaagaggac	0.872331	0.670448	7.89181	6.10184	strong	1	-1.78997	-0.198362
chr20	25692700	chr20:25692700:C:A	C	A	SNV	CTCF	jaspar2022	MA1930.1	MA1930.1	caaactgtttggtctcactcctgccatctgttgCcatctgtgggagttaatatcctgtaggaacagaa	0.709756	0.676957	11.7636	11.2559	weak	1	-0.50766	-0.0312294
chr6	5261227	chr6:5261227:A:C	A	C	SNV	CTCF	jaspar2022	MA1930.1	MA1930.1	catttgtgtttcgggggcagcgccccttcctacCtccaggaggccgcgttgcccgggttaccgaaggc	0.604303	0.716402	10.1314	11.8664	strong	1	1.73503	0.106732
chr19	4867638	chr19:4867638:T:G	T	G	SNV	OLIG2	jaspar2022	MA0678.1	MA0678.1	aggaacagcTgccgcgact	0.633303	0.516667	7.26977	5.94415	strong	1	-1.32561	-0.115901
chr4	82739534	chr4:82739534:C:T	C	T	SNV	CTCF	jaspar2022	MA0139.1	MA0139.1	ggctggtagagccacactCcgcctgctggttgtgtgc	0.863012	0.792541	11.9088	10.9578	strong	1	-0.950917	-0.0691214
chr12	9319419	chr12:9319419:C:T	C	T	SNV	CTCF	jaspar2022	MA0139.1	MA0139.1	ctcttctgctccccctgcTggattcctcagccccttc	0.843814	0.902522	11.6497	12.4419	strong	1	0.792178	0.0575828
chr14	104846256	chr14:104846256:T:C	T	C	SNV	NFIC	jaspar2022	MA1527.1	MA1527.1	aagggccccaggaatcTggccaccagccaagtc	0.958101	0.841316	16.4879	14.4924	strong	1	-1.99554	-0.115994
chr5	172771552	chr5:172771552:G:A	G	A	SNV	NEUROD1	jaspar2022	MA1109.1	MA1109.1	ggccgggagaacAggcgacgtgcca	0.57779	0.663363	6.45665	7.39135	strong	1	0.934698	0.0844476
chr1	230978849	chr1:230978849:C:T	C	T	SNV	OLIG2	jaspar2022	MA0678.1	MA0678.1	aggcgcatgTgcgacagcc	0.628869	0.718112	7.21937	8.23365	strong	1	1.01428	0.0886806
chr10	43455533	chr10:43455533:C:T	C	T	SNV	CREB1	jaspar2022	MA0018.4	MA0018.4	gtcaacgcctgaTgcgccccttccc	0.570093	0.611639	5.9834	6.40111	weak	1	0.417708	0.0405316
chr5	10421964	chr5:10421964:A:G	A	G	SNV	CTCF	jaspar2022	MA0139.1	MA0139.1	cagaaaggaagttaaggcGgagcagtcagaacacatg	0.510386	0.580987	7.15058	8.10323	strong	1	0.95265	0.0692474
chr10	110226812	chr10:110226812:T:A	T	A	SNV	NR2F2	jaspar2022	MA1111.1	MA1111.1	gggaggggcgAgcacatgtga	0.531418	0.591468	5.57183	6.18587	weak	1	0.614041	0.0592511
chr15	22224468	chr15:22224468:G:T	G	T	SNV	MEF2A	jaspar2022	MA0052.4	MA0052.4	acacacaccttcctTagctcaccacctgg	0.384659	0.448691	4.21925	4.87099	weak	1	0.651734	0.0621745
chr16	2090548	chr16:2090548:C:A	C	A	SNV	RELB	jaspar2022	MA1117.1	MA1117.1	accaacagggActgggccacg	0.594943	0.727512	5.43265	6.58957	strong	1	1.15692	0.129011
chr17	18781174	chr17:18781174:A:G	A	G	SNV	RELB	jaspar2022	MA1117.1	MA1117.1	gtgaggccggActgaggctct	0.579996	0.478085	5.30221	4.41284	strong	1	-0.889372	-0.0991766
chr18	56389369	chr18:56389369:C:A	C	A	SNV	CTCF	jaspar2022	MA0139.1	MA0139.1	aggcctggcctctgccacCctctacagcctcatcgac	0.749871	0.61934	10.3821	8.62075	strong	1	-1.76133	-0.12803
chr9	33523459	chr9:33523459:A:G	A	G	SNV	NR2F1	jaspar2022	MA0017.2	MA0017.2	cagaggaagaccAgggcaggtggca	0.780833	0.745119	9.44984	9.02544	weak	1	-0.4244	-0.0352075
chrX	135052279	chrX:135052279:A:G	A	G	SNV	SP4	jaspar2022	MA0685.2	MA0685.2	ttgtggtcGctagtgcg	0.386742	0.524635	5.05918	6.85677	strong	1	1.79759	0.137707
chr3	173676262	chr3:173676262:A:G	A	G	SNV	MEF2A	jaspar2022	MA0052.4	MA0052.4	gcctttgacagactAtagaatcttagcag	0.629671	0.540953	6.71304	5.81005	strong	1	-0.902995	-0.0861445
chr19	50333592	chr19:50333592:T:A	T	A	SNV	CREB1	jaspar2022	MA0018.4	MA0018.4	caacgaccgtgaTgctccacggagc	0.613604	0.560432	6.42087	5.88626	weak	1	-0.534601	-0.0518741
chr18	50582621	chr18:50582621:C:T	C	T	SNV	NFIC	jaspar2022	MA0161.2	MA0161.2	gaaatctctaCagctgctgct	0.53613	0.451745	5.3095	4.50267	strong	1	-0.806834	-0.0827969
chr19	12551043	chr19:12551043:T:C	T	C	SNV	SP1	jaspar2022	MA0079.5	MA0079.5	tgtcccagCacaaacaa	0.441211	0.588774	5.86843	7.81712	strong	1	1.94869	0.147097
chr3	160565760	chr3:160565760:G:C	G	C	SNV	NEUROD1	jaspar2022	MA1109.1	MA1109.1	gcggcgggggcaGgcggggaaggac	0.739578	0.601752	8.22383	6.71838	strong	1	-1.50546	-0.136014
chr18	56389369	chr18:56389369:C:A	C	A	SNV	CTCF	jaspar2022	MA1930.1	MA1930.1	ttacaaagagtttcaaggcctggcctctgccacCctctacagcctcatcgacactcctgccaaacaga	0.762823	0.658658	12.5849	10.9727	strong	1	-1.61223	-0.0991786
chr9	40992055	chr9:40992055:C:G	C	G	SNV	NEUROD1	jaspar2022	MA1109.1	MA1109.1	cagcccgcagctGtagcgggaggca	0.636079	0.80008	7.09333	8.88468	strong	1	1.79136	0.161844
chr3	11010653	chr3:11010653:A:C	A	C	SNV	NFIC	jaspar2022	MA1527.1	MA1527.1	ttatgtttccccttggCatgaagccaaactcaa	0.880667	0.997452	15.1648	17.1603	strong	1	1.99554	0.115994
chr7	112450313	chr7:112450313:A:G	A	G	SNV	SP1	jaspar2022	MA0079.5	MA0079.5	cgcatgggGtttgtagg	0.555922	0.598154	7.38328	7.94098	weak	1	0.5577	0.042098
chr9	128735553	chr9:128735553:C:T	C	T	SNV	NFIC	jaspar2022	MA0161.2	MA0161.2	ggcaggatgcCagggagaagg	0.855338	0.713149	8.36157	7.00204	strong	1	-1.35953	-0.139514
chr11	397921	chr11:397921:G:C	G	C	SNV	NR2F1	jaspar2022	MA1537.1	MA1537.1	cctgcgtcacctccGtacccccacatata	0.614607	0.53942	11.4471	10.0539	strong	1	-1.39315	-0.0749485
chr10	100508938	chr10:100508938:G:A	G	A	SNV	CTCF	jaspar2022	MA0139.1	MA0139.1	gagctctgattggctccaGaactcaagacttttactt	0.58545	0.480123	8.16345	6.74221	strong	1	-1.42124	-0.103309
chr19	883725	chr19:883725:A:G	A	G	SNV	NEUROD1	jaspar2022	MA1109.1	MA1109.1	acagacgtgcccAgcgggggcaccg	0.736969	0.573765	8.19533	6.41268	strong	1	-1.78265	-0.161057
chr11	111878541	chr11:111878541:C:T	C	T	SNV	CTCF	jaspar2022	MA0139.1	MA0139.1	acattttccttgtgagggCgctcctttcctcaccttt	0.763081	0.705033	10.5603	9.77706	strong	1	-0.783266	-0.056935
chr11	64653029	chr11:64653029:T:A	T	A	SNV	NR2F1	jaspar2022	MA1537.1	MA1537.1	gcctaccacgtgcaAgtgctcccccatgt	0.470591	0.511078	8.77857	9.52876	strong	1	0.750193	0.0403587
chr9	86637600	chr9:86637600:T:G	T	G	SNV	CTCF	jaspar2022	MA0139.1	MA0139.1	cagcctgtgcttgtcggcGccagcttgggtcaaacgt	0.736151	0.790973	10.1969	10.9367	strong	1	0.739752	0.0537719
chr1	230315222	chr1:230315222:A:C	A	C	SNV	CTCF	jaspar2022	MA1930.1	MA1930.1	agccaccccctcaccccccaccagagttccctgCaggaaccagctgcctctagtgggagacagagtaa	0.661405	0.689694	11.0152	11.4531	weak	1	0.437857	0.0269354
chr8	22010323	chr8:22010323:A:G	A	G	SNV	NR3C1	jaspar2022	MA0113.3	MA0113.3	gttccggctctcccccAgctttcgccgccgcgc	0.462448	0.412003	8.01891	7.15746	strong	1	-0.861446	-0.050088
chr19	12933730	chr19:12933730:C:A	C	A	SNV	NR2F1	jaspar2022	MA1538.1	MA1538.1	agcgtgtccgggccCgggtgggcgggggg	0.610636	0.547963	10.0245	9.01209	strong	1	-1.01243	-0.0620574
chr7	36127575	chr7:36127575:C:T	C	T	SNV	CTCF	jaspar2022	MA1929.1	MA1929.1	atggtctcgagagcctgctataccactgaaaacCacttgaggaccctagagaacgttcctggattac	0.824828	0.713932	11.3652	9.94709	strong	1	-1.41807	-0.10423
chr19	22532605	chr19:22532605:G:A	G	A	SNV	SOX8	jaspar2022	MA0868.2	MA0868.2	caggcagcaAcgcgtccag	0.474774	0.659438	4.36692	6.00422	strong	1	1.6373	0.181443
chr18	7567228	chr18:7567228:A:G	A	G	SNV	CTCF	jaspar2022	MA0139.1	MA0139.1	ggcgcgggccggcggggcGcgggcgctcacgccctct	0.595476	0.665948	8.29874	9.24965	strong	1	0.950917	0.0691214
chr3	126202450	chr3:126202450:T:A	T	A	SNV	MEIS2	jaspar2022	MA1640.1	MA1640.1	ggaagttcagccagAtccatttcagactt	0.557892	0.701075	5.92623	7.38102	strong	1	1.45479	0.139639
chr2	136305658	chr2:136305658:T:C	T	C	SNV	NR2F1	jaspar2022	MA1537.1	MA1537.1	tcagttccctgccaTgtgggcctctgcac	0.58149	0.548145	10.8335	10.2156	weak	1	-0.61786	-0.0332395
chr1	976215	chr1:976215:A:G	A	G	SNV	MEF2A	jaspar2022	MA0052.4	MA0052.4	ggcgcccttgccccAcctgccggcggaag	0.350341	0.307697	3.86996	3.43592	weak	1	-0.434041	-0.0414069
chr5	23821068	chr5:23821068:A:G	A	G	SNV	CTCF	jaspar2022	MA1929.1	MA1929.1	acgaaaaagatttgctaactatataggaacactAgagggagcccacttccaagagacttcatgtggc	0.64781	0.602281	9.10156	8.51936	weak	1	-0.582197	-0.0427924
chr2	66440054	chr2:66440054:C:T	C	T	SNV	ZNF24	jaspar2022	MA1124.1	MA1124.1	aacacacacgcgTgcgcgcgcgcgc	0.436557	0.490289	7.03987	7.86395	strong	1	0.824076	0.052552
chr1	230910370	chr1:230910370:A:G	A	G	SNV	SOX8	jaspar2022	MA0868.2	MA0868.2	ggcagggctAgcactgcgc	0.598859	0.544009	5.46711	4.98078	weak	1	-0.486326	-0.0538938
chr9	68750097	chr9:68750097:A:C	A	C	SNV	NFIC	jaspar2022	MA1527.1	MA1527.1	gtgcctggcaaattgcCaagtatttaatgcagg	0.880066	0.996851	15.1545	17.1501	strong	1	1.99554	0.115994
chr2	38346548	chr2:38346548:G:A	G	A	SNV	CTCF	jaspar2022	MA1930.1	MA1930.1	gggtctggtttcatgaaagacaagttttccacaGaagggggagcagtggtttcaggataaaactgttc	0.656516	0.622898	10.9396	10.4192	weak	1	-0.520325	-0.0320085
chr16	74616968	chr16:74616968:T:C	T	C	SNV	NFIC	jaspar2022	MA1527.1	MA1527.1	aatattacttcctttaTggcaatttgccagttt	0.964433	0.84929	16.5961	14.6286	strong	1	-1.96749	-0.114363
chr5	180313827	chr5:180313827:T:C	T	C	SNV	NR2F2	jaspar2022	MA1111.1	MA1111.1	gccacgccgaCctccggccct	0.601645	0.763811	6.28993	7.94818	strong	1	1.65825	0.160011
chr7	5228008	chr7:5228008:G:C	G	C	SNV	CTCF	jaspar2022	MA1930.1	MA1930.1	cacctgcagctgcccttgtgctcatcttgctggCgtctctttcctcgcctgccaaaagtgaggccgcc	0.671135	0.703048	11.1658	11.6598	weak	1	0.493939	0.0303853
chr11	118628678	chr11:118628678:C:G	C	G	SNV	SP1	jaspar2022	MA0079.5	MA0079.5	gcttgccaCtgtccatg	0.557908	0.458119	7.40951	6.0917	strong	1	-1.3178	-0.0994744
chr15	24773224	chr15:24773224:C:G	C	G	SNV	ZEB1	jaspar2022	MA0103.3	MA0103.3	tggccggcagGagccgatcca	0.662266	0.81591	6.94414	8.53583	strong	1	1.59169	0.152418
chr17	79145226	chr17:79145226:C:T	C	T	SNV	NR2F1	jaspar2022	MA1537.1	MA1537.1	caggagcctgcgcaTgtcctatccgagtg	0.469383	0.507808	8.75617	9.46816	strong	1	0.711987	0.0383033
chr3	197458507	chr3:197458507:C:T	C	T	SNV	CTCF	jaspar2022	MA0139.1	MA0139.1	actgcgccagcgcccagaCcacctgctggagaaagaa	0.849885	0.779413	11.7316	10.7807	strong	1	-0.950917	-0.0691214
chr1	143195063	chr1:143195063:C:A	C	A	SNV	SOX8	jaspar2022	MA0868.2	MA0868.2	gagaatcatAgaatggact	0.595845	0.762675	5.44038	6.91956	strong	1	1.47918	0.163921
chr22	28772767	chr22:28772767:T:C	T	C	SNV	NR2F1	jaspar2022	MA1538.1	MA1538.1	aggctggcgggtttTggcagtagctgtgg	0.517707	0.481168	8.52333	7.93307	weak	1	-0.59026	-0.0361804
chr19	36973405	chr19:36973405:G:A	G	A	SNV	ZNF143	jaspar2022	MA0088.2	MA0088.2	cacgcttcaccgctaAgggaggtcagggctg	0.477761	0.514938	9.34682	10.0697	strong	1	0.722894	0.0370684
chrX	49002391	chrX:49002391:G:A	G	A	SNV	SP1	jaspar2022	MA0079.5	MA0079.5	accgacgaGtcaggtga	0.509523	0.417692	6.77054	5.55784	strong	1	-1.2127	-0.0915407
chr9	63817564	chr9:63817564:T:G	T	G	SNV	BHLHE40	jaspar2022	MA0464.2	MA0464.2	tgctttcttGtcattgttg	0.363201	0.528908	4.32859	6.26235	strong	1	1.93376	0.164437
chr19	4867678	chr19:4867678:A:G	A	G	SNV	OLIG2	jaspar2022	MA0678.1	MA0678.1	tccgggccgAggcgggggt	0.476592	0.329412	5.48867	3.81592	strong	1	-1.67276	-0.146253
chr6	41191794	chr6:41191794:C:G	C	G	SNV	CTCF	jaspar2022	MA0139.1	MA0139.1	gagagcgtgggctctgcgGggtcccaggacaggaggg	0.524939	0.655182	7.34694	9.10438	strong	1	1.75744	0.127747
chr9	33388291	chr9:33388291:C:T	C	T	SNV	RELB	jaspar2022	MA1117.1	MA1117.1	gagccagaaaTagatgttgca	0.449135	0.560877	4.16019	5.13536	strong	1	0.975172	0.108744
chr1	109283514	chr1:109283514:C:T	C	T	SNV	CTCF	jaspar2022	MA0139.1	MA0139.1	tgtgctgcctaacgtggcCgctaaccgacgctctacg	0.673818	0.615771	9.35585	8.57259	strong	1	-0.783266	-0.056935
chr5	73780686	chr5:73780686:C:A	C	A	SNV	CTCF	jaspar2022	MA0139.1	MA0139.1	tttcctaggcctttgagcCagaagccaggccagagga	0.659959	0.557082	9.16884	7.78067	strong	1	-1.38817	-0.100905
chr2	90392334	chr2:90392334:T:C	T	C	SNV	SRF	jaspar2022	MA0083.3	MA0083.3	gaatggaatcatcatTgaatggaatcgaata	0.584773	0.539337	11.2709	10.4103	strong	1	-0.86066	-0.0449756
chr2	90392334	chr2:90392334:T:C	T	C	SNV	CTCF	jaspar2022	MA1930.1	MA1930.1	gaatcttcgagtggacacgaatggaatcatcatCgaatggaatcgaatagaatcatcaaatggacttg	0.577153	0.662066	9.71121	11.0254	strong	1	1.31424	0.0808473
chr15	39976878	chr15:39976878:G:T	G	T	SNV	MEF2A	jaspar2022	MA0052.4	MA0052.4	cagctgcctctgatTcgccccctagtttc	0.472431	0.532446	5.11262	5.72346	weak	1	0.610847	0.058274
chr11	66002932	chr11:66002932:T:C	T	C	SNV	CTCF	jaspar2022	MA1930.1	MA1930.1	gtcttggttcagccaaggtcacagagggagtgaCagcttccgcgcagccctggctacggactctgggc	0.570486	0.601204	9.60801	10.0835	weak	1	0.475441	0.0292474
chr4	186651919	chr4:186651919:A:C	A	C	SNV	SP1	jaspar2022	MA0079.5	MA0079.5	tgtccctgCagtactgg	0.363902	0.474704	4.8475	6.31073	strong	1	1.46323	0.110452
chr11	2732716	chr11:2732716:C:G	C	G	SNV	CTCF	jaspar2022	MA1929.1	MA1929.1	caaggcacaagcggccttttcttcctcaccgggGcggcgcacacagctcccagcctggcttcccttg	0.617967	0.6526	8.71994	9.16281	weak	1	0.442863	0.0325511
chr6	146957649	chr6:146957649:G:T	G	T	SNV	NFIC	jaspar2022	MA0161.2	MA0161.2	ttggccctctGccaataacca	0.870846	0.728199	8.50984	7.14594	strong	1	-1.3639	-0.139963
chr11	76920254	chr11:76920254:T:A	T	A	SNV	CTCF	jaspar2022	MA1930.1	MA1930.1	ctattgcagaacgtggctgtcagcagcacctagTggtcagtagcatcccctgcccacctacctctccg	0.810428	0.778373	13.3217	12.8256	weak	1	-0.496134	-0.0305203
chrX	100189529	chrX:100189529:G:A	G	A	SNV	NFIC	jaspar2022	MA1527.1	MA1527.1	catcaatgccatcctgGctccctgccaacatcc	0.973166	0.85742	16.7454	14.7676	strong	1	-1.97779	-0.114962
chr15	39976878	chr15:39976878:G:T	G	T	SNV	OLIG2	jaspar2022	MA0678.1	MA0678.1	gcctctgatGcgcccccta	0.595393	0.480213	6.8389	5.52983	strong	1	-1.30907	-0.114455
chr19	10654238	chr19:10654238:G:A	G	A	SNV	SP4	jaspar2022	MA0685.2	MA0685.2	ttgggcctGcgtcgagg	0.657708	0.56215	8.59154	7.34583	strong	1	-1.24571	-0.0954296
chr5	172722071	chr5:172722071:A:G	A	G	SNV	NR2F2	jaspar2022	MA1111.1	MA1111.1	atcatttcccGtcaacacaaa	0.559096	0.60763	5.85484	6.35113	weak	1	0.49629	0.0478889
chr7	1160276	chr7:1160276:A:G	A	G	SNV	SP1	jaspar2022	MA0079.5	MA0079.5	gccggcgcGcaccgaag	0.608027	0.670779	8.07136	8.90005	strong	1	0.828693	0.0625538
chr20	63846184	chr20:63846184:G:T	G	T	SNV	NR2F2	jaspar2022	MA1111.1	MA1111.1	cctccagaggTaggagcattc	0.529111	0.648481	5.54823	6.76887	strong	1	1.22063	0.117783
chr19	53554523	chr19:53554523:C:G	C	G	SNV	SP4	jaspar2022	MA0685.2	MA0685.2	atgggtggGgggaccga	0.86923	0.912548	11.349	11.9137	weak	1	0.564695	0.0432594
chrX	85003837	chrX:85003837:C:G	C	G	SNV	NR2F1	jaspar2022	MA0017.2	MA0017.2	ggtggggctgtcCtaagggaagcct	0.737881	0.59093	8.93942	7.19316	strong	1	-1.74626	-0.144867
chr12	70558017	chr12:70558017:C:T	C	T	SNV	NR3C1	jaspar2022	MA0113.3	MA0113.3	ctctgggcaactactgTagctggctgtggggga	0.568225	0.647913	9.82526	11.1861	strong	1	1.36083	0.0791241
chr13	30134241	chr13:30134241:A:G	A	G	SNV	OLIG2	jaspar2022	MA0678.1	MA0678.1	tcctgccagAtggggcagc	0.768521	0.593007	8.80657	6.81178	strong	1	-1.99479	-0.174409
chr2	197453301	chr2:197453301:A:C	A	C	SNV	MEIS2	jaspar2022	MA0774.1	MA0774.1	gcacgggCaaagcga	0.557283	0.648198	5.72062	6.63471	strong	1	0.914096	0.0898649
chr17	17237171	chr17:17237171:C:G	C	G	SNV	TBR1	jaspar2022	MA0802.1	MA0802.1	ccccgccgaCacccaggcg	0.630399	0.456466	7.11709	5.19919	strong	1	-1.9179	-0.171355
chr9	40992221	chr9:40992221:A:G	A	G	SNV	NR3C1	jaspar2022	MA0113.3	MA0113.3	gccctctgcagccgccGtagctccccagcagaa	0.427408	0.517637	7.42053	8.96137	strong	1	1.54084	0.0895911
chr3	125916672	chr3:125916672:C:G	C	G	SNV	NR2F1	jaspar2022	MA0017.2	MA0017.2	ctgcagagtttgGagcgccgctttc	0.478198	0.532646	5.85352	6.50055	weak	1	0.647028	0.0536762
chr12	131622151	chr12:131622151:C:T	C	T	SNV	SP1	jaspar2022	MA0079.5	MA0079.5	ataaaaggCcctcagag	0.505442	0.449879	6.71665	5.98289	strong	1	-0.733754	-0.0553874
chr17	29180189	chr17:29180189:G:A	G	A	SNV	ZNF24	jaspar2022	MA1124.1	MA1124.1	caggggacggggAaggaggaggagg	0.456928	0.526984	7.3523	8.42671	strong	1	1.07441	0.0685158
chr9	130053612	chr9:130053612:G:T	G	T	SNV	MEF2A	jaspar2022	MA0052.4	MA0052.4	gatcaggggtccccTgagcccaaggtcgc	0.297228	0.369344	3.32937	4.06338	strong	1	0.734013	0.0700239
chr1	11907848	chr1:11907848:G:C	G	C	SNV	CTCF	jaspar2022	MA0139.1	MA0139.1	cagactctgctctgccccCcggtggtggcctcaggcg	0.732597	0.860121	10.149	11.8697	strong	1	1.72075	0.12508
chr2	239735334	chr2:239735334:C:A	C	A	SNV	CTCF	jaspar2022	MA0139.1	MA0139.1	gccggcactcatacagggCcccctgccggggccagga	0.869554	0.800552	11.997	11.0659	strong	1	-0.931078	-0.0676793
chr1	6352018	chr1:6352018:G:A	G	A	SNV	NFIB	jaspar2022	MA1643.1	MA1643.1	ccaggaactgcagaccgcacGccagctggctaccacgggcc	0.68299	0.602905	11.5178	10.2105	strong	1	-1.30735	-0.0783177
chr7	44196095	chr7:44196095:A:T	A	T	SNV	RELB	jaspar2022	MA1117.1	MA1117.1	atgcagcagaAggcaggtctt	0.567476	0.487331	5.19295	4.49352	weak	1	-0.699425	-0.077995
chr2	90392334	chr2:90392334:T:C	T	C	SNV	BHLHE41	jaspar2022	MA0636.1	MA0636.1	aatcatcatCgaatggaat	0.422469	0.492401	6.10469	7.1117	strong	1	1.00701	0.069829
chr4	7067650	chr4:7067650:G:C	G	C	SNV	CTCF	jaspar2022	MA0139.1	MA0139.1	cgccgagaccgtgaatgcCcgcgaggcgtcgccgcag	0.738055	0.818509	10.2226	11.3083	strong	1	1.08561	0.0789121
chr12	29381276	chr12:29381276:C:A	C	A	SNV	CREB1	jaspar2022	MA0018.4	MA0018.4	ctttgcttacgaCgtgcttagggaa	0.582137	0.51715	6.10449	5.4511	weak	1	-0.653388	-0.0634003
chr4	44678340	chr4:44678340:C:G	C	G	SNV	BHLHE41	jaspar2022	MA0636.1	MA0636.1	ttagggagtCaatcgaaag	0.566033	0.511496	8.17199	7.38667	strong	1	-0.785321	-0.0544564
chr18	3910668	chr18:3910668:T:C	T	C	SNV	RELB	jaspar2022	MA1117.1	MA1117.1	cattgccatcCgctagtgcct	0.46019	0.628093	4.25667	5.72195	strong	1	1.46528	0.163398
chr11	119941058	chr11:119941058:C:A	C	A	SNV	NFIC	jaspar2022	MA1527.1	MA1527.1	cccttggccacttgccAatcaggatccattcag	0.879694	0.996478	15.1482	17.1437	strong	1	1.99554	0.115994
chr12	103626683	chr12:103626683:T:C	T	C	SNV	NEUROD1	jaspar2022	MA1109.1	MA1109.1	catccaggcatcTactgggtgccag	0.728583	0.638023	8.10373	7.11456	strong	1	-0.989168	-0.0893689
chr4	186150128	chr4:186150128:G:C	G	C	SNV	CTCF	jaspar2022	MA0139.1	MA0139.1	tcaccttcaccccctaccCctgggggcgctgttgcct	0.750707	0.782113	10.3934	10.8171	weak	1	0.423775	0.0308039
chr15	55196906	chr15:55196906:A:G	A	G	SNV	NR2F1	jaspar2022	MA1537.1	MA1537.1	ttgaacccgcgtgtGaccccaccaaacaa	0.582068	0.653648	10.8442	12.1705	strong	1	1.32633	0.0713535
chr1	109761309	chr1:109761309:G:C	G	C	SNV	NEUROD1	jaspar2022	MA1109.1	MA1109.1	ccacccctccccCtccctgacactg	0.529795	0.573192	5.9324	6.40643	weak	1	0.474029	0.0428273
chr3	108406767	chr3:108406767:C:T	C	T	SNV	CTCF	jaspar2022	MA0139.1	MA0139.1	gcgaatagaatgtgttgcCatctagtggtactaagtg	0.925404	0.795465	12.7506	10.9973	strong	1	-1.75334	-0.127449
chr12	82910687	chr12:82910687:C:T	C	T	SNV	NFIC	jaspar2022	MA0161.2	MA0161.2	ccatggagtcTggctgctccc	0.47494	0.616095	4.72444	6.07407	strong	1	1.34964	0.138499
chr16	3432002	chr16:3432002:G:T	G	T	SNV	CLOCK	jaspar2022	MA0819.2	MA0819.2	gtagcgcaaGtcatctcgt	0.667549	0.560142	6.52539	5.48492	strong	1	-1.04048	-0.10676
chr20	48635976	chr20:48635976:C:T	C	T	SNV	CTCF	jaspar2022	MA1930.1	MA1930.1	caggcgtcttgtgcagcagcagccagcagagggCgctccaaggccaggcctccccaccagccagcagc	0.811328	0.783726	13.3357	12.9085	weak	1	-0.427214	-0.0262806
chr19	45635440	chr19:45635440:G:A	G	A	SNV	NFIC	jaspar2022	MA1527.1	MA1527.1	ccgctggcgcccagccAaggaatgtattttgca	0.849406	0.964549	14.6306	16.5981	strong	1	1.96749	0.114363
chr7	8390028	chr7:8390028:G:C	G	C	SNV	NR2F2	jaspar2022	MA1111.1	MA1111.1	gcacgtaagaCaggcagctgg	0.531366	0.602257	5.57129	6.29619	strong	1	0.724902	0.0699485
chr14	93537108	chr14:93537108:G:A	G	A	SNV	CTCF	jaspar2022	MA1930.1	MA1930.1	tcataaagccttagagtctaacgcccccttgggGgtgttcacatcttcacaagcactattgaaagaga	0.742635	0.641446	12.2725	10.7063	strong	1	-1.56616	-0.0963441
chrX	131747410	chrX:131747410:A:G	A	G	SNV	CTCF	jaspar2022	MA1930.1	MA1930.1	tgagaaaacgccacctatagacaaatcacaaccAaacgtggatgccttctattttgcccagttggtag	0.619278	0.583885	10.3632	9.8154	weak	1	-0.547797	-0.0336984
chr17	7932247	chr17:7932247:A:G	A	G	SNV	GATA4	jaspar2022	MA0482.2	MA0482.2	agcgtagggggAggcgtgagagg	0.453311	0.398283	4.61315	4.07971	weak	1	-0.533435	-0.053813
chr11	132771168	chr11:132771168:T:C	T	C	SNV	NFIC	jaspar2022	MA0161.2	MA0161.2	aataggttagCtagagcatat	0.458245	0.597265	4.56482	5.89404	strong	1	1.32922	0.136404
chr20	62352989	chr20:62352989:G:A	G	A	SNV	ZEB1	jaspar2022	MA0103.3	MA0103.3	tgagccttcgGgtcctcgtct	0.682701	0.532789	7.15584	5.60281	strong	1	-1.55304	-0.148716
chr20	61629121	chr20:61629121:A:G	A	G	SNV	ZBTB7B	jaspar2022	MA0694.1	MA0694.1	gagcagctgccActttgcatagc	0.621026	0.579922	7.77479	7.27111	weak	1	-0.503678	-0.0405585
chr9	92325922	chr9:92325922:A:G	A	G	SNV	SP1	jaspar2022	MA0079.5	MA0079.5	cgcgcgcgGggcttgaa	0.623345	0.730424	8.27365	9.6877	strong	1	1.41406	0.10674
chr19	14518738	chr19:14518738:G:A	G	A	SNV	NR2F1	jaspar2022	MA0017.2	MA0017.2	cctgggtcagtaGgtcgggacccac	0.91671	0.872797	11.0645	10.5427	weak	1	-0.521834	-0.0432903
chr4	1511861	chr4:1511861:A:C	A	C	SNV	SP1	jaspar2022	MA0079.5	MA0079.5	tgctccatCtgtctaac	0.457099	0.498397	6.07824	6.62361	weak	1	0.54537	0.0411673
chr19	14518738	chr19:14518738:G:A	G	A	SNV	NR2F1	jaspar2022	MA1538.1	MA1538.1	cgcctgggtcagtaAgtcgggacccacag	0.645415	0.681806	10.5863	11.1742	weak	1	0.587867	0.0360337
chr12	53599779	chr12:53599779:C:A	C	A	SNV	CTCF	jaspar2022	MA0139.1	MA0139.1	cacaccaccagtaagtgtCagtggacagtcacatgac	0.736801	0.702482	10.2057	9.74263	weak	1	-0.46309	-0.0336616
chr10	109884450	chr10:109884450:G:A	G	A	SNV	CTCF	jaspar2022	MA1929.1	MA1929.1	gagaactgcccccacaaggagttgaaatgatccGcctagtggtgacctgccaggcctggccttgaag	0.760061	0.704154	10.537	9.82205	strong	1	-0.714905	-0.0525466
chr16	583125	chr16:583125:T:C	T	C	SNV	MAZ	jaspar2022	MA1522.1	MA1522.1	gcgcatgtccCgtgctttgtg	0.585561	0.706039	7.87149	9.47389	strong	1	1.6024	0.119728
chr19	41958636	chr19:41958636:G:A	G	A	SNV	MEF2A	jaspar2022	MA0052.4	MA0052.4	gggccctgggcggtAagaggagggaccgg	0.487337	0.547074	5.26433	5.87235	weak	1	0.608013	0.0580036
chr3	134472461	chr3:134472461:C:A	C	A	SNV	NFIC	jaspar2022	MA1527.1	MA1527.1	agtagttggctaagagCcagatgaaatttaggc	0.961505	0.848514	16.5461	14.6154	strong	1	-1.93071	-0.112226
chr7	92624858	chr7:92624858:C:T	C	T	SNV	NFIC	jaspar2022	MA1527.1	MA1527.1	gagaaatgtagtagtaCaattatccctattttc	0.511046	0.422396	8.84895	7.33415	strong	1	-1.5148	-0.08805
chr2	240216409	chr2:240216409:T:C	T	C	SNV	NFIC	jaspar2022	MA0161.2	MA0161.2	gcactgcaacTgccagcctca	0.725035	0.615072	7.11569	6.06429	strong	1	-1.0514	-0.107894
chr16	3365063	chr16:3365063:C:T	C	T	SNV	MAZ	jaspar2022	MA1522.1	MA1522.1	atgcctctggCcctcttgagg	0.693728	0.589963	9.31015	7.93003	strong	1	-1.38012	-0.103119
chr19	58059544	chr19:58059544:T:G	T	G	SNV	OLIG2	jaspar2022	MA0678.1	MA0678.1	acgcccagcTggacaggag	0.579374	0.462738	6.65684	5.33122	strong	1	-1.32561	-0.115901
chr14	55133712	chr14:55133712:G:T	G	T	SNV	CTCF	jaspar2022	MA0139.1	MA0139.1	ggtggtgttgaaacagtgGaaatgcaacgagatctgc	0.524435	0.393903	7.34014	5.57881	strong	1	-1.76133	-0.12803
chr11	113716035	chr11:113716035:T:C	T	C	SNV	NR3C1	jaspar2022	MA0113.3	MA0113.3	gtatctttccatggtaCatggtgtgccattacc	0.866895	0.983467	14.9256	16.9163	strong	1	1.99068	0.115746
chrX	41923740	chrX:41923740:G:C	G	C	SNV	NFIC	jaspar2022	MA1527.1	MA1527.1	tccgcccactccaaccGgtcgggaggcggtggc	0.495342	0.46906	8.58061	8.13152	weak	1	-0.449088	-0.0261039
chr16	77438088	chr16:77438088:C:G	C	G	SNV	CTCF	jaspar2022	MA1930.1	MA1930.1	ctagatggtgacagagaatcatgagcccatgctGcagtcttggagttataaactgcaaagtagctttt	0.491552	0.517783	8.38631	8.7923	weak	1	0.405982	0.0249745
chr5	178346699	chr5:178346699:C:T	C	T	SNV	ZNF24	jaspar2022	MA1124.1	MA1124.1	gctgaaatcacaCaagggccctttt	0.548575	0.51248	8.75784	8.20428	weak	1	-0.553567	-0.0353014
chrX	131779465	chrX:131779465:T:G	T	G	SNV	ZNF384	jaspar2022	MA1125.1	MA1125.1	cttggattcccTcttctcccgcc	0.633611	0.507131	7.92242	6.3725	strong	1	-1.54991	-0.12487
chr3	86511469	chr3:86511469:T:C	T	C	SNV	NFIC	jaspar2022	MA1527.1	MA1527.1	aattctggaatatgggCcagatggcatatttga	0.657071	0.753833	11.3441	12.9975	strong	1	1.65339	0.0961059
chr11	66002932	chr11:66002932:T:C	T	C	SNV	CTCF	jaspar2022	MA0139.1	MA0139.1	aggtcacagagggagtgaCagcttccgcgcagccctg	0.582184	0.69405	8.11938	9.62885	strong	1	1.50947	0.109722
chr8	101667940	chr8:101667940:C:T	C	T	SNV	NFIC	jaspar2022	MA0161.2	MA0161.2	agctctgagtTggcaggctgg	0.728492	0.869647	7.14875	8.49839	strong	1	1.34964	0.138499
chr11	116276772	chr11:116276772:T:A	T	A	SNV	CTCF	jaspar2022	MA1930.1	MA1930.1	gccaatgcatcagtgtagagcaagcctgccaccTggtggtgaggccacccaactacaggctggggctc	0.919115	0.85941	15.0039	14.0799	strong	1	-0.924094	-0.0568468
chr15	101451568	chr15:101451568:T:C	T	C	SNV	OLIG2	jaspar2022	MA0678.1	MA0678.1	aaaaaaaacCgtactttat	0.493247	0.636995	5.67797	7.31172	strong	1	1.63375	0.142843
chr1	21673636	chr1:21673636:G:C	G	C	SNV	NR2F1	jaspar2022	MA1537.1	MA1537.1	ggcctccctggagtCcgtgccccacttcc	0.440725	0.505081	8.22517	9.41763	strong	1	1.19247	0.0641521
chr21	45756240	chr21:45756240:G:C	G	C	SNV	MAZ	jaspar2022	MA1522.1	MA1522.1	accagacagcCatctgtgctg	0.457458	0.558384	6.16767	7.51003	strong	1	1.34236	0.100298
chr5	21391680	chr5:21391680:G:C	G	C	SNV	CTCF	jaspar2022	MA1930.1	MA1930.1	ttcataaagggatacatagggtgccacctggtgGaataagaaacactgaaaagggacttgttacaaat	0.736329	0.689215	12.1749	11.4457	strong	1	-0.729204	-0.0448579
chr20	61940764	chr20:61940764:A:G	A	G	SNV	SOX8	jaspar2022	MA0868.2	MA0868.2	gtgcagctcAaggcgctgt	0.617378	0.402086	5.6313	3.72245	strong	1	-1.90886	-0.211536
chr16	8869050	chr16:8869050:G:A	G	A	SNV	SP1	jaspar2022	MA0079.5	MA0079.5	ggggggtgGggcgccga	0.937248	0.830169	12.419	11.0049	strong	1	-1.41406	-0.10674
chr1	212242691	chr1:212242691:T:A	T	A	SNV	OLIG2	jaspar2022	MA0678.1	MA0678.1	acagtcacaTgaaataaaa	0.722741	0.583366	8.28626	6.7022	strong	1	-1.58406	-0.138498
chr17	45585159	chr17:45585159:T:G	T	G	SNV	CTCF	jaspar2022	MA0139.1	MA0139.1	tgcggatcgccttcagccGccatctcgtttcttccgt	0.663439	0.729521	9.2158	10.1075	strong	1	0.891677	0.0648153
chr2	159133988	chr2:159133988:A:G	A	G	SNV	CTCF	jaspar2022	MA1930.1	MA1930.1	tataaatgcttttgtagtatgcctttagatggcGgcatctctcgccataaaccatcttttgaacagaa	0.629568	0.666269	10.5225	11.0905	weak	1	0.568046	0.0349441
chrX	135098909	chrX:135098909:C:A	C	A	SNV	NEUROD1	jaspar2022	MA1109.1	MA1109.1	cgggccccgcccAccagcatagctc	0.5693	0.707489	6.36392	7.87333	strong	1	1.50942	0.136372
chr3	116517497	chr3:116517497:C:A	C	A	SNV	CTCF	jaspar2022	MA0139.1	MA0139.1	ctgtattctgaaagactgCcaccttgaggtcacttat	0.900105	0.831104	12.4093	11.4782	strong	1	-0.931078	-0.0676793
chr19	40443334	chr19:40443334:C:G	C	G	SNV	MAZ	jaspar2022	MA1522.1	MA1522.1	gagccaccccCctcaccccgc	0.856417	0.724293	11.474	9.71668	strong	1	-1.7573	-0.131302
chr9	86044223	chr9:86044223:C:G	C	G	SNV	CTCF	jaspar2022	MA0139.1	MA0139.1	tactggggacaagactgcCcccacgtgagaaccactg	0.771299	0.678138	10.6712	9.41414	strong	1	-1.25708	-0.0913759
chr4	119454572	chr4:119454572:G:A	G	A	SNV	SRF	jaspar2022	MA0083.3	MA0083.3	ccactctgacgagaaAactgcccagctccag	0.371741	0.470205	7.23563	9.10076	strong	1	1.86512	0.0974659
chr4	75991075	chr4:75991075:C:G	C	G	SNV	SP4	jaspar2022	MA0685.2	MA0685.2	ttggagagGcagccacc	0.601169	0.675597	7.85448	8.82473	strong	1	0.970251	0.0743276
chr10	133609041	chr10:133609041:G:C	G	C	SNV	CTCF	jaspar2022	MA1929.1	MA1929.1	acaccaatgggaaagaattaaacgccatctagaGggcagagaggaaaatctcaccttcaatattgta	0.69638	0.633772	9.72264	8.92205	strong	1	-0.800593	-0.0588449
chr6	30453804	chr6:30453804:G:A	G	A	SNV	CTCF	jaspar2022	MA1929.1	MA1929.1	tgttctgcagctggaaaccgaacgggaccctgtAgaagtcgcgggtggggaagcgaaaggggagctg	0.71284	0.758369	9.93313	10.5153	weak	1	0.582197	0.0427924
chr17	29180189	chr17:29180189:G:A	G	A	SNV	CTCF	jaspar2022	MA1930.1	MA1930.1	gggagtccgggccgctgcttccaggggacggggGaggaggaggaggagccggcgggccccgccgcccg	0.602107	0.548557	10.0974	9.2686	strong	1	-0.828825	-0.0509863
chr22	35646939	chr22:35646939:C:T	C	T	SNV	NR2F2	jaspar2022	MA1111.1	MA1111.1	cccagccaggTagccaagtcc	0.472192	0.636055	4.9662	6.6418	strong	1	1.67559	0.161684
chr15	63916681	chr15:63916681:C:T	C	T	SNV	CTCF	jaspar2022	MA1929.1	MA1929.1	acagctgcagaaaggctgtgagcctgaaggctgCcccctacagtgaacaagccagtggaaggaggca	0.759541	0.728019	10.5303	10.1272	weak	1	-0.403086	-0.0296274
chr10	70779347	chr10:70779347:T:G	T	G	SNV	OLIG2	jaspar2022	MA0678.1	MA0678.1	ccctctgtgTgttattact	0.547591	0.508398	6.29562	5.85016	weak	1	-0.445455	-0.0389471
chr6	41720555	chr6:41720555:C:T	C	T	SNV	NR2F1	jaspar2022	MA1537.1	MA1537.1	ggccgctcaggagaCagtgtgcctccttt	0.571427	0.522037	10.647	9.73182	strong	1	-0.915169	-0.049234
chr2	238320388	chr2:238320388:C:A	C	A	SNV	SP4	jaspar2022	MA0685.2	MA0685.2	aacccccaCtcctgcct	0.78827	0.638783	10.2936	8.34482	strong	1	-1.94873	-0.149286
chr11	2732716	chr11:2732716:C:G	C	G	SNV	SP1	jaspar2022	MA0079.5	MA0079.5	tcaccgggGcggcgcac	0.819897	0.967461	10.8693	12.818	strong	1	1.94869	0.147097
chr19	3762700	chr19:3762700:C:T	C	T	SNV	CREB1	jaspar2022	MA0018.4	MA0018.4	cccgcaatacgtCatggcgaccaaa	0.684153	0.610329	7.13018	6.38793	strong	1	-0.742244	-0.0720224
chrX	119853214	chrX:119853214:T:C	T	C	SNV	SP4	jaspar2022	MA0685.2	MA0685.2	attagcaaCtccgccat	0.648849	0.798336	8.47605	10.4248	strong	1	1.94873	0.149286
chr7	102467250	chr7:102467250:G:C	G	C	SNV	CTCF	jaspar2022	MA1929.1	MA1929.1	ttatgaggctgtgattccaggaggcttccagcaGgtggcgggattgagattccctgagatggagggc	0.722119	0.686394	10.0518	9.59495	weak	1	-0.456821	-0.033577
chr14	70817855	chr14:70817855:T:A	T	A	SNV	ZKSCAN1	jaspar2022	MA1585.1	MA1585.1	cgtgtggtaAtgaggggta	0.516564	0.604367	6.59129	7.68753	strong	1	1.09624	0.0868164
chr16	8682700	chr16:8682700:A:G	A	G	SNV	NFIC	jaspar2022	MA0161.2	MA0161.2	cttggatatcGgcaacttgcc	0.566739	0.729356	5.60217	7.15701	strong	1	1.55484	0.159557
chr1	234600109	chr1:234600109:T:G	T	G	SNV	EGR1	jaspar2022	MA0162.4	MA0162.4	gcagctggcgcgcGggcttggcctggc	0.654409	0.806514	6.82182	8.33585	strong	1	1.51403	0.147541
chr18	49944901	chr18:49944901:C:T	C	T	SNV	CTCF	jaspar2022	MA1929.1	MA1929.1	ctcagacctccctccaccagatggcctcctcccCatgctgctgaaatgtaccttgaaagcaactcca	0.652252	0.596677	9.15836	8.4477	strong	1	-0.710662	-0.0522348
chrX	39687503	chrX:39687503:T:C	T	C	SNV	ZBTB7B	jaspar2022	MA0694.1	MA0694.1	cctctcaggctCgctctctctct	0.41997	0.478634	5.31114	6.02998	strong	1	0.718846	0.0578848
chr2	190841986	chr2:190841986:G:T	G	T	SNV	PKNOX1	jaspar2022	MA0782.2	MA0782.2	gcctccacccccttGtcactcaaggacat	0.961928	0.818452	10.4101	8.90389	strong	1	-1.50619	-0.139336
chr7	155297446	chr7:155297446:A:G	A	G	SNV	CTCF	jaspar2022	MA1930.1	MA1930.1	atcgagacccgccgcctcccggccaggcgcgggGcaccaggcgaggggagccaggagccgggaggggc	0.672128	0.775985	11.1812	12.7886	strong	1	1.60745	0.0988842
chr1	16904867	chr1:16904867:C:T	C	T	SNV	SP4	jaspar2022	MA0685.2	MA0685.2	cacttcccCcgccggct	0.814595	0.744004	10.6367	9.71651	strong	1	-0.920226	-0.0704954
chr7	90119390	chr7:90119390:C:G	C	G	SNV	SP4	jaspar2022	MA0685.2	MA0685.2	cgccccacCcgacattt	0.901838	0.752351	11.7741	9.82532	strong	1	-1.94873	-0.149286
chr6	13574703	chr6:13574703:C:T	C	T	SNV	NR2F1	jaspar2022	MA1538.1	MA1538.1	gcgctccgggggtaCccagagctcttagc	0.535137	0.448746	8.80489	7.40933	strong	1	-1.39556	-0.085542
chrX	11111210	chrX:11111210:G:A	G	A	SNV	SP1	jaspar2022	MA0079.5	MA0079.5	gaggggacGgaacccgc	0.762456	0.637202	10.1107	8.45664	strong	1	-1.65408	-0.124858
chr4	88697686	chr4:88697686:T:C	T	C	SNV	SP1	jaspar2022	MA0079.5	MA0079.5	acctcctcCgccgctgc	0.683163	0.830726	9.06359	11.0123	strong	1	1.94869	0.147097
chr19	51422097	chr19:51422097:C:A	C	A	SNV	CTCF	jaspar2022	MA0139.1	MA0139.1	gcagttcaggacgccgccAccagggggcgctccacct	0.924526	0.98773	12.7388	13.5916	strong	1	0.852846	0.0619927
chr11	119030904	chr11:119030904:A:T	A	T	SNV	RELB	jaspar2022	MA1117.1	MA1117.1	aggctgcgcaAgcgcggccgg	0.592144	0.520471	5.40822	4.78274	weak	1	-0.625483	-0.0697496
chr22	50327413	chr22:50327413:G:T	G	T	SNV	CREB1	jaspar2022	MA0018.4	MA0018.4	gcaggggccagcGgcgtcgcgggcg	0.54272	0.449483	5.70819	4.77077	strong	1	-0.937422	-0.0909611
chr11	45211922	chr11:45211922:G:A	G	A	SNV	MAZ	jaspar2022	MA1522.1	MA1522.1	caaggccacaGgatggcccca	0.705253	0.5615	9.46344	7.55147	strong	1	-1.91197	-0.142858
chr19	51271284	chr19:51271284:A:G	A	G	SNV	NFIC	jaspar2022	MA1527.1	MA1527.1	ggcggggcttcaagggAttggtatccccgtgca	0.569384	0.469032	9.84579	8.13104	strong	1	-1.71475	-0.0996725
chr4	183960167	chr4:183960167:C:G	C	G	SNV	CLOCK	jaspar2022	MA0819.2	MA0819.2	ttgggagagCgctttgaaa	0.533291	0.393499	5.22481	3.87062	strong	1	-1.35419	-0.13895
chr18	25727797	chr18:25727797:T:G	T	G	SNV	NFIC	jaspar2022	MA0161.2	MA0161.2	ctggccaactGccaagaaagc	0.857121	0.999768	8.37862	9.74252	strong	1	1.3639	0.139963
chr11	18013149	chr11:18013149:A:G	A	G	SNV	SOX8	jaspar2022	MA0868.2	MA0868.2	gcggcccgcAggccgggag	0.392717	0.223102	3.63937	2.13551	strong	1	-1.50387	-0.166656
chr4	130336788	chr4:130336788:A:G	A	G	SNV	CTCF	jaspar2022	MA1930.1	MA1930.1	attataaacatattctcccttcctccattaggtGgcagcacacctaccttctcatgaggattagtgtc	0.647243	0.74996	10.796	12.3858	strong	1	1.5898	0.0977989
chr5	6713027	chr5:6713027:G:A	G	A	SNV	SP1	jaspar2022	MA0079.5	MA0079.5	gcgcacgcGcagcgcgg	0.607668	0.574218	8.06662	7.62488	weak	1	-0.441742	-0.0333448
chr17	81356193	chr17:81356193:C:T	C	T	SNV	NR2F1	jaspar2022	MA1538.1	MA1538.1	cttggtggtgcatgTctgtaatcctagct	0.594012	0.639898	9.75597	10.4972	strong	1	0.74124	0.0454349
chr16	84800330	chr16:84800330:G:A	G	A	SNV	NFIC	jaspar2022	MA1527.1	MA1527.1	tgtcttcgaggaactgGcaacgtgccaaacact	0.99675	0.883759	17.1483	15.2176	strong	1	-1.93071	-0.112226
chr2	109379771	chr2:109379771:C:T	C	T	SNV	CTCF	jaspar2022	MA1930.1	MA1930.1	actgtgcctccaggaacactttgtaaagccctcCtgcaggtgaagcccggtcattgccaagaacactg	0.814896	0.699945	13.3909	11.6117	strong	1	-1.77917	-0.109448
chr17	38456632	chr17:38456632:T:G	T	G	SNV	CTCF	jaspar2022	MA1930.1	MA1930.1	catgatgttatggatttaagagtcctctaggggGcctcttggcttttcaaagccaggcagcttctccg	0.771402	0.821687	12.7177	13.496	strong	1	0.778301	0.0478782
chr14	70817908	chr14:70817908:A:G	A	G	SNV	NR3C1	jaspar2022	MA0113.3	MA0113.3	ctttttctagttaagaActagaataaccttcgc	0.548333	0.432544	9.48556	7.50823	strong	1	-1.97733	-0.11497
chr4	37802312	chr4:37802312:C:A	C	A	SNV	CTCF	jaspar2022	MA0139.1	MA0139.1	caccacactgcctcccagCtacctggtgataaaaagc	0.726101	0.657099	10.0613	9.13026	strong	1	-0.931078	-0.0676793
chr3	75785697	chr3:75785697:G:C	G	C	SNV	ZNF143	jaspar2022	MA0088.2	MA0088.2	ggctctgcggtccccCgttaggaacccaagc	0.482167	0.579329	9.43248	11.3218	strong	1	1.88929	0.0968788
chr19	20278569	chr19:20278569:A:G	A	G	SNV	CTCF	jaspar2022	MA1930.1	MA1930.1	actatgagacttaatcctacatcaccacctagtGgacagggtggtgcattacataaaattattaaagc	0.76905	0.882236	12.6813	14.4331	strong	1	1.75184	0.107767
chr9	40992055	chr9:40992055:C:G	C	G	SNV	OLIG2	jaspar2022	MA0678.1	MA0678.1	cccgcagctGtagcgggag	0.42447	0.560469	4.89629	6.44198	strong	1	1.54569	0.135143
chr9	40992220	chr9:40992220:C:T	C	T	SNV	OLIG2	jaspar2022	MA0678.1	MA0678.1	tgcagccgcCatagctccc	0.679625	0.535877	7.79623	6.16247	strong	1	-1.63375	-0.142843
chr19	14518738	chr19:14518738:G:A	G	A	SNV	NR2F1	jaspar2022	MA1537.1	MA1537.1	cgcctgggtcagtaGgtcgggacccacag	0.572819	0.505463	10.6728	9.42472	strong	1	-1.24806	-0.067143
chrX	71950346	chrX:71950346:G:T	G	T	SNV	SOX8	jaspar2022	MA0868.2	MA0868.2	aagacctaaTcctggccaa	0.475153	0.531502	4.37028	4.86989	weak	1	0.49961	0.0553659
chr9	118829532	chr9:118829532:A:G	A	G	SNV	CTCF	jaspar2022	MA0139.1	MA0139.1	acttaagaatataaaaccAccagatgtcagtagtggt	0.870294	0.811586	12.007	11.2148	strong	1	-0.792178	-0.0575828
chr4	138911055	chr4:138911055:A:C	A	C	SNV	SP1	jaspar2022	MA0079.5	MA0079.5	agataacaCcaaaagcc	0.385493	0.464787	5.13262	6.17976	strong	1	1.04713	0.0790428
chr19	5903758	chr19:5903758:C:G	C	G	SNV	SP4	jaspar2022	MA0685.2	MA0685.2	gggaagcgGaagggcag	0.56215	0.700805	7.34583	9.15336	strong	1	1.80753	0.138469
chr4	183960167	chr4:183960167:C:G	C	G	SNV	NEUROD1	jaspar2022	MA1109.1	MA1109.1	atattgggagagGgctttgaaacag	0.533694	0.682232	5.97499	7.59745	strong	1	1.62246	0.146585
chr10	4826253	chr10:4826253:G:T	G	T	SNV	MAZ	jaspar2022	MA1522.1	MA1522.1	cgccagcgccTcagtagctcg	0.57651	0.707205	7.7511	9.48941	strong	1	1.73831	0.129882
chr1	230910370	chr1:230910370:A:G	A	G	SNV	NFIC	jaspar2022	MA0161.2	MA0161.2	gggcagggctGgcactgcgca	0.600804	0.724996	5.92788	7.11532	strong	1	1.18744	0.121855
chr6	158814293	chr6:158814293:C:G	C	G	SNV	CTCF	jaspar2022	MA1930.1	MA1930.1	cctgtggagtgctgccgcgtgcgccccccagccGtcaagcaagattcagctgaagtgttacttctcaa	0.511446	0.57256	8.69421	9.64011	strong	1	0.945896	0.058188
chr7	75106109	chr7:75106109:A:C	A	C	SNV	SP1	jaspar2022	MA0079.5	MA0079.5	tcccttacCtcttcagt	0.480618	0.596717	6.38883	7.92201	strong	1	1.53318	0.115732
chr11	888957	chr11:888957:G:A	G	A	SNV	CTCF	jaspar2022	MA1930.1	MA1930.1	cacagcaacgccagtgcccctccccctccagacGgctggacgcgctctgctcttcccgggctgcccct	0.673372	0.58228	11.2004	9.79056	strong	1	-1.40988	-0.0867307
chr5	20833519	chr5:20833519:C:T	C	T	SNV	CTCF	jaspar2022	MA1930.1	MA1930.1	caccctcaaatactggcaagtcatgcatccttaCagttgatatttctatcctgttttcaatcctactc	0.576647	0.482464	9.70338	8.24564	strong	1	-1.45774	-0.0896746
chr7	47322886	chr7:47322886:G:A	G	A	SNV	NFIC	jaspar2022	MA1527.1	MA1527.1	gaccctgctctatctgGcacatggccagtagca	0.972015	0.859024	16.7257	14.795	strong	1	-1.93071	-0.112226
chr12	9751478	chr12:9751478:C:A	C	A	SNV	CTCF	jaspar2022	MA1929.1	MA1929.1	gggagtagattgttggtaatgatagaatattacCgctaggaggctgcttgtttcttttttcccacag	0.646479	0.537055	9.08453	7.68528	strong	1	-1.39925	-0.102847
chr4	7313478	chr4:7313478:C:G	C	G	SNV	CLOCK	jaspar2022	MA0819.2	MA0819.2	aggagcggaCatgctgggg	0.685654	0.558524	6.70078	5.46924	strong	1	-1.23153	-0.126364
chr19	53467676	chr19:53467676:T:C	T	C	SNV	ZNF24	jaspar2022	MA1124.1	MA1124.1	ccccgcccctgcTtcgtcaggcccc	0.512791	0.415372	8.20904	6.71497	strong	1	-1.49407	-0.0952784
chr8	130514126	chr8:130514126:C:A	C	A	SNV	NFIC	jaspar2022	MA1527.1	MA1527.1	acaactgcccagggagCattgagtcctgattaa	0.601102	0.484317	10.3878	8.39223	strong	1	-1.99554	-0.115994
chr9	64369265	chr9:64369265:C:T	C	T	SNV	CTCF	jaspar2022	MA1929.1	MA1929.1	gatcccaggagaaccggcgagcccatcggcgcaTgcccagagctgcagccccacctgctggcgcgcg	0.739285	0.785983	10.2713	10.8684	weak	1	0.597148	0.0438913
chr12	12468	chr12:12468:G:C	G	C	SNV	CTCF	jaspar2022	MA1930.1	MA1930.1	ccgtctgctgccatcggagcccaaagccgggctGtgactgctcagaccagccagctggaggggctcag	0.738814	0.666993	12.2133	11.1017	strong	1	-1.11161	-0.0683823
chr15	22223329	chr15:22223329:C:T	C	T	SNV	CTCF	jaspar2022	MA1930.1	MA1930.1	caggtggcgcccaggtcccgagcctgctctgtcTgcaatgcagccttcatcccccgacctgcacgtcc	0.647686	0.697603	10.8029	11.5755	strong	1	0.772596	0.0475273
chr2	197453301	chr2:197453301:A:C	A	C	SNV	MEF2A	jaspar2022	MA0052.4	MA0052.4	cgcgagcgcacgggAaaagcgattggtcg	0.522054	0.458352	5.61769	4.96932	weak	1	-0.648372	-0.0618538
chr1	16709920	chr1:16709920:T:C	T	C	SNV	ZNF384	jaspar2022	MA1125.1	MA1125.1	ctgctgggctgTtgggtgtgaac	0.5036	0.346322	6.32925	4.40193	strong	1	-1.92732	-0.155276
chr19	38619011	chr19:38619011:A:C	A	C	SNV	SP1	jaspar2022	MA0079.5	MA0079.5	ccagtaagCtttttctc	0.351829	0.388634	4.68807	5.17411	weak	1	0.486045	0.0366891
chr2	90392334	chr2:90392334:T:C	T	C	SNV	TCF12	jaspar2022	MA1648.1	MA1648.1	gaatcatcatCgaatggaatc	0.444131	0.577618	3.90399	5.02228	strong	1	1.11828	0.130629
chr10	102534471	chr10:102534471:C:A	C	A	SNV	SP1	jaspar2022	MA0079.5	MA0079.5	tttccccaCctaggaag	0.699704	0.552141	9.28203	7.33334	strong	1	-1.94869	-0.147097
chr11	64653029	chr11:64653029:T:A	T	A	SNV	CREB1	jaspar2022	MA0018.4	MA0018.4	ctaccacgtgcaTgtgctcccccat	0.562706	0.462049	5.90913	4.89711	strong	1	-1.01202	-0.0981996
chr3	142498695	chr3:142498695:A:G	A	G	SNV	SP1	jaspar2022	MA0079.5	MA0079.5	agtgagtcGtaaaaagc	0.482649	0.550919	6.41565	7.31721	strong	1	0.901556	0.0680539
chr3	2218560	chr3:2218560:A:G	A	G	SNV	NFIC	jaspar2022	MA0161.2	MA0161.2	aagttttttgGcacatagcca	0.713597	0.869718	7.00633	8.49906	strong	1	1.49273	0.153183
chr4	128761504	chr4:128761504:A:G	A	G	SNV	NFIC	jaspar2022	MA0161.2	MA0161.2	gcagtgagccAagatcgcgcc	0.89063	0.749475	8.69901	7.34937	strong	1	-1.34964	-0.138499
chr1	45500031	chr1:45500031:G:T	G	T	SNV	CTCF	jaspar2022	MA0139.1	MA0139.1	gccacctgggaaactgagGtcgcctcttgcgaacaca	0.716266	0.661443	9.92863	9.18888	strong	1	-0.739752	-0.0537719
chr16	6066750	chr16:6066750:G:A	G	A	SNV	REST	jaspar2022	MA0138.2	MA0138.2	ttggcctttgcccaggtgccGggtacgatgtcaaggatgca	0.712108	0.66529	14.6194	13.6868	strong	1	-0.932641	-0.0458199
chr19	13234712	chr19:13234712:G:A	G	A	SNV	CTCF	jaspar2022	MA0139.1	MA0139.1	gagggcacgccccctatcGgaagagaaggccggcacg	0.863696	0.725091	11.918	10.0477	strong	1	-1.87027	-0.135949
chr22	42070946	chr22:42070946:C:T	C	T	SNV	SOX8	jaspar2022	MA0868.2	MA0868.2	ccttccccaTtgggctccc	0.553946	0.738611	5.06889	6.70619	strong	1	1.6373	0.181443
chr8	6331423	chr8:6331423:C:G	C	G	SNV	CTCF	jaspar2022	MA0139.1	MA0139.1	cctgagccccagagtcttCcctggtcaaacaccacac	0.570159	0.525043	7.95713	7.34834	weak	1	-0.608785	-0.0442521
chr12	6038255	chr12:6038255:C:G	C	G	SNV	CTCF	jaspar2022	MA1929.1	MA1929.1	cagtgtcagctctgacttaagcctgaggcccacCacctagtggctgctataagaatgactgaggtat	0.811142	0.698589	11.1902	9.75088	strong	1	-1.43927	-0.105789
chr10	60353906	chr10:60353906:G:A	G	A	SNV	MEF2A	jaspar2022	MA0052.4	MA0052.4	gcagggccagcagaActacgtgcattgtt	0.555579	0.635891	5.95891	6.77635	strong	1	0.817431	0.0779818
chr12	131622076	chr12:131622076:A:G	A	G	SNV	SOX8	jaspar2022	MA0868.2	MA0868.2	ccccgaggcAaagggccca	0.62939	0.453642	5.73781	4.17956	strong	1	-1.55825	-0.172683
chr5	73780686	chr5:73780686:C:A	C	A	SNV	CTCF	jaspar2022	MA1930.1	MA1930.1	tttttttccccattgtttcctaggcctttgagcAagaagccaggccagaggaaagaacagctatgccc	0.520767	0.568327	8.83849	9.5746	strong	1	0.736109	0.0452827
chr14	100376441	chr14:100376441:T:C	T	C	SNV	BHLHE41	jaspar2022	MA0636.1	MA0636.1	gtcggaacgTgactggatg	0.824953	0.693873	11.9004	10.0129	strong	1	-1.88753	-0.130887
chr9	96687008	chr9:96687008:C:T	C	T	SNV	CREB1	jaspar2022	MA0018.4	MA0018.4	cccgccccgcccTgccctcggcaca	0.531584	0.685837	5.59623	7.14711	strong	1	1.55088	0.150487
chr19	21638983	chr19:21638983:C:T	C	T	SNV	CLOCK	jaspar2022	MA0819.2	MA0819.2	ataaagagaCagatggtag	0.751831	0.593932	7.34184	5.81225	strong	1	-1.52959	-0.156947
chr12	102702719	chr12:102702719:G:A	G	A	SNV	CTCF	jaspar2022	MA0139.1	MA0139.1	gtggggggaagcatacccGccccctggtggctgattt	0.971499	0.913451	13.3726	12.5894	strong	1	-0.783266	-0.056935
chr12	124673908	chr12:124673908:A:G	A	G	SNV	RELB	jaspar2022	MA1117.1	MA1117.1	atgcccagatGtgcatgtgca	0.414525	0.516962	3.85816	4.75211	strong	1	0.893957	0.0996879
chr11	111878541	chr11:111878541:C:T	C	T	SNV	CTCF	jaspar2022	MA1930.1	MA1930.1	ttatggacatcttaaacattttccttgtgagggCgctcctttcctcacctttggaaaaatttggcaag	0.687959	0.660357	11.4262	10.999	weak	1	-0.427214	-0.0262806
chr21	32949943	chr21:32949943:G:C	G	C	SNV	NEUROD1	jaspar2022	MA1109.1	MA1109.1	ccagcttgtcacCtgggactggtga	0.729218	0.780575	8.11067	8.67164	weak	1	0.56096	0.0506814
chr7	139021490	chr7:139021490:C:T	C	T	SNV	NFIC	jaspar2022	MA0161.2	MA0161.2	aattactacaCacacacataa	0.537626	0.430773	5.32381	4.30214	strong	1	-1.02167	-0.104843
chr9	40992055	chr9:40992055:C:G	C	G	SNV	SP1	jaspar2022	MA0079.5	MA0079.5	ccgcagctGtagcggga	0.550321	0.636604	7.30931	8.44874	strong	1	1.13943	0.08601
chr11	116348441	chr11:116348441:T:G	T	G	SNV	SP1	jaspar2022	MA0079.5	MA0079.5	tgcagggaGgcaacaac	0.602499	0.737291	7.99836	9.7784	strong	1	1.78004	0.134367
chr5	346695	chr5:346695:T:A	T	A	SNV	NR2F1	jaspar2022	MA1538.1	MA1538.1	ttcacctgcagaccAcagcctcaccctgt	0.510031	0.545263	8.39933	8.96848	weak	1	0.56915	0.0348865
chr2	50273223	chr2:50273223:A:G	A	G	SNV	NFIC	jaspar2022	MA1527.1	MA1527.1	gaaaatttggcaatctGccaaaatgaaaactgc	0.900438	0.997199	15.5026	17.156	strong	1	1.65339	0.0961059
chr1	225481080	chr1:225481080:C:T	C	T	SNV	CTCF	jaspar2022	MA0139.1	MA0139.1	ctgttcctgagtgcagttCccatggggccctgtgtgg	0.585274	0.545935	8.16107	7.63026	weak	1	-0.53081	-0.0385842
chr1	150293808	chr1:150293808:G:A	G	A	SNV	ZNF143	jaspar2022	MA0088.2	MA0088.2	cacgttgtctccctcAgcctgtttctttgcg	0.467767	0.517642	9.15247	10.1223	strong	1	0.969808	0.0497296
chr2	216013634	chr2:216013634:C:T	C	T	SNV	CTCF	jaspar2022	MA0139.1	MA0139.1	acgccccgctaccgccctCtaagggtgaagcagggac	0.870089	0.730626	12.0042	10.1224	strong	1	-1.88185	-0.13679
chr4	154119536	chr4:154119536:G:C	G	C	SNV	CTCF	jaspar2022	MA1930.1	MA1930.1	cctgctcctcagagggtgagtgctccacccagaGgaaagagacatgcacagcatcctttaatgtagtc	0.817918	0.704507	13.4377	11.6823	strong	1	-1.75534	-0.107982
chr1	119737534	chr1:119737534:C:T	C	T	SNV	SP1	jaspar2022	MA0079.5	MA0079.5	ttcccaggCccagcctc	0.704873	0.636604	9.3503	8.44874	strong	1	-0.901556	-0.0680539
chr19	48568499	chr19:48568499:A:G	A	G	SNV	NFIB	jaspar2022	MA1643.1	MA1643.1	atgccagtcacactcctgccAagagagtatctctgcgccac	0.51221	0.444429	8.72993	7.62344	strong	1	-1.10649	-0.0662854
chr15	90706567	chr15:90706567:C:T	C	T	SNV	NFIC	jaspar2022	MA0161.2	MA0161.2	gattcctgggCtgcatgccag	0.746945	0.695679	7.32518	6.83501	weak	1	-0.490168	-0.0503008
chr19	17395124	chr19:17395124:A:C	A	C	SNV	CTCF	jaspar2022	MA0139.1	MA0139.1	gcctgctcgccactgggcCgccagagggcgatcttac	0.754647	0.892329	10.4465	12.3043	strong	1	1.85782	0.135043
chr8	143959566	chr8:143959566:G:A	G	A	SNV	NEUROD1	jaspar2022	MA1109.1	MA1109.1	acacaagttcccAtcagacagcgag	0.678403	0.81006	7.55563	8.99369	strong	1	1.43806	0.129925
chr6	39411636	chr6:39411636:G:A	G	A	SNV	NEUROD1	jaspar2022	MA1109.1	MA1109.1	cagatgagtcagAttggcaatggtg	0.706939	0.814081	7.86732	9.03762	strong	1	1.1703	0.105733
chr7	74393901	chr7:74393901:A:C	A	C	SNV	CTCF	jaspar2022	MA0139.1	MA0139.1	aggaacaaaccagccaggCccctggccagggttccag	0.540193	0.578782	7.55277	8.07348	weak	1	0.520704	0.0378495
chr10	70669027	chr10:70669027:C:G	C	G	SNV	CTCF	jaspar2022	MA1929.1	MA1929.1	ttaggacaaacctacagcagtgtccacagagggCtgctggtggcctgctgggagatggggttgcatt	0.794392	0.682366	10.976	9.54344	strong	1	-1.43253	-0.105293
chr9	37552641	chr9:37552641:G:A	G	A	SNV	NFIC	jaspar2022	MA1527.1	MA1527.1	gagctggcagtgagccAagattgcgccactgca	0.881518	0.996661	15.1793	17.1468	strong	1	1.96749	0.114363
chr22	48489207	chr22:48489207:A:C	A	C	SNV	CTCF	jaspar2022	MA1930.1	MA1930.1	ctccccgtggggggcccaggctgcgggcgcgtcAggccgtctctgtcgccatccggaggagcggcttg	0.668758	0.629889	11.129	10.5274	weak	1	-0.6016	-0.0370082
chr11	72630298	chr11:72630298:G:A	G	A	SNV	SOX8	jaspar2022	MA0868.2	MA0868.2	cagagtcacAtgatggaga	0.484454	0.611149	4.45275	5.57607	strong	1	1.12332	0.124484
chr16	813838	chr16:813838:G:A	G	A	SNV	ZEB1	jaspar2022	MA0103.3	MA0103.3	cgtcaccaccAggtggagcca	0.838964	0.992106	8.77467	10.3612	strong	1	1.58649	0.15192
chr17	51536026	chr17:51536026:C:G	C	G	SNV	CTCF	jaspar2022	MA1930.1	MA1930.1	ttggttgttataactgggttgcaggtactactgCcatctagtgggtagagatcagggatgctaagctt	0.871389	0.819422	14.2653	13.4609	strong	1	-0.804312	-0.0494783
chr4	86994468	chr4:86994468:C:G	C	G	SNV	TBR1	jaspar2022	MA0802.1	MA0802.1	ttatgcaatGtgggggcag	0.560545	0.658294	6.34683	7.42468	strong	1	1.07784	0.0962998
chr6	136793115	chr6:136793115:G:A	G	A	SNV	TBR1	jaspar2022	MA0802.1	MA0802.1	gcccctgaaAcatttccag	0.522889	0.660333	5.93161	7.44716	strong	1	1.51555	0.135407
chr6	32692246	chr6:32692246:T:C	T	C	SNV	CTCF	jaspar2022	MA1930.1	MA1930.1	gcaacgccctctacagtccaggcaacaggtacaCggttttcaatcccatttgaactgcttctgggtct	0.597248	0.701105	10.0222	11.6297	strong	1	1.60745	0.0988842
chr20	35009073	chr20:35009073:G:A	G	A	SNV	SRF	jaspar2022	MA0083.3	MA0083.3	cagtctgccagatggGgaaagactctgccaa	0.710645	0.610976	13.6552	11.7672	strong	1	-1.88795	-0.0986587
chr18	58554552	chr18:58554552:T:C	T	C	SNV	NFIC	jaspar2022	MA0161.2	MA0161.2	gtcccctcccTggcagcctgc	0.855349	0.714194	8.36167	7.01204	strong	1	-1.34964	-0.138499
chr18	9334517	chr18:9334517:G:T	G	T	SNV	OLIG2	jaspar2022	MA0678.1	MA0678.1	gggcgggcgTgagcctgcg	0.34167	0.489538	3.95524	5.63581	strong	1	1.68058	0.146937
chr9	105447931	chr9:105447931:A:C	A	C	SNV	CTCF	jaspar2022	MA0139.1	MA0139.1	gaggcactagcggtagacCgacgggcggcgctcccca	0.717885	0.76309	9.95047	10.5604	weak	1	0.609975	0.0443386
chr12	53054536	chr12:53054536:C:T	C	T	SNV	CTCF	jaspar2022	MA1930.1	MA1930.1	gctaatcactgacgtcaccagcggaggcgaggcCgccagggggcgggaccagagtggtggggtggggg	0.68848	0.575295	11.4343	9.68244	strong	1	-1.75184	-0.107767
chr8	41723089	chr8:41723089:T:C	T	C	SNV	NFIC	jaspar2022	MA0161.2	MA0161.2	tggagccctgCctagaaaatg	0.702748	0.858869	6.9026	8.39533	strong	1	1.49273	0.153183
chr8	41723089	chr8:41723089:T:C	T	C	SNV	NFIC	jaspar2022	MA1527.1	MA1527.1	tggacctggagccctgCctagaaaatgcgcctg	0.651698	0.764689	11.2523	13.183	strong	1	1.93071	0.112226
chr4	85784511	chr4:85784511:C:T	C	T	SNV	CTCF	jaspar2022	MA0139.1	MA0139.1	gtaacaaacgtccccttcCtccagatgcacaatgctc	0.709517	0.658268	9.83756	9.14602	weak	1	-0.691541	-0.0502675
chr9	63817564	chr9:63817564:T:G	T	G	SNV	ZNF24	jaspar2022	MA1124.1	MA1124.1	gaatgctttcttTtcattgttgaca	0.640044	0.580988	10.1607	9.25495	strong	1	-0.905718	-0.0577585
chr21	39385961	chr21:39385961:G:A	G	A	SNV	BHLHE41	jaspar2022	MA0636.1	MA0636.1	gagctgcacGcactgcgca	0.592617	0.455167	8.55481	6.57553	strong	1	-1.97928	-0.137249
chr14	24232410	chr14:24232410:A:C	A	C	SNV	NR3C1	jaspar2022	MA0113.3	MA0113.3	ccccccccccccccccActgggttccggaaagg	0.621763	0.520251	10.7395	9.00601	strong	1	-1.73351	-0.100793
chr17	3535367	chr17:3535367:T:A	T	A	SNV	RELB	jaspar2022	MA1117.1	MA1117.1	tccctcatccTtcctgcttcc	0.576752	0.520639	5.27389	4.78421	weak	1	-0.489689	-0.0546068
chr8	27201188	chr8:27201188:T:C	T	C	SNV	CTCF	jaspar2022	MA0139.1	MA0139.1	aaagcctggagctcccccTaatgcgacttaaggcaat	0.801646	0.698972	11.0807	9.69527	strong	1	-1.38544	-0.100706
chr3	42701652	chr3:42701652:C:T	C	T	SNV	NEUROD1	jaspar2022	MA1109.1	MA1109.1	atcaggccccggCtgagtctcacca	0.731111	0.611109	8.13135	6.82058	strong	1	-1.31076	-0.118424
chrX	71254216	chrX:71254216:C:T	C	T	SNV	NR2F2	jaspar2022	MA1111.1	MA1111.1	accccattggTtggctcgagg	0.463439	0.508434	4.8767	5.3368	weak	1	0.460102	0.044397
chr16	3443495	chr16:3443495:G:A	G	A	SNV	CTCF	jaspar2022	MA1930.1	MA1930.1	ccacgctctcatgctcctttacgcaggagctgcAggaaaagccgccggaagcgacccgccctcagccc	0.532545	0.582462	9.02078	9.79338	strong	1	0.772596	0.0475273
chr12	68808017	chr12:68808017:C:G	C	G	SNV	NFIC	jaspar2022	MA1527.1	MA1527.1	cccccaccccgcctcaCagcccgccgcgcccgc	0.619784	0.593737	10.707	10.2619	weak	1	-0.445076	-0.0258707
chr10	1251973	chr10:1251973:G:A	G	A	SNV	SP1	jaspar2022	MA0079.5	MA0079.5	aactgtgaGcaatgaac	0.509266	0.361702	6.76714	4.81845	strong	1	-1.94869	-0.147097
chr10	1251973	chr10:1251973:G:A	G	A	SNV	NFIC	jaspar2022	MA1527.1	MA1527.1	gcccccagaactgtgaGcaatgaacttctgttg	0.452278	0.408189	7.84476	7.0914	strong	1	-0.753364	-0.0437904
chr17	64919496	chr17:64919496:A:T	A	T	SNV	NR2F1	jaspar2022	MA0017.2	MA0017.2	cgtgagctgagcTgcctacgagcct	0.66498	0.72947	8.07312	8.83947	strong	1	0.766356	0.0635755
chr9	68750097	chr9:68750097:A:C	A	C	SNV	NFIC	jaspar2022	MA0161.2	MA0161.2	ggcaaattgcCaagtatttaa	0.833883	0.999955	8.15643	9.74431	strong	1	1.58788	0.162947
chr21	39385961	chr21:39385961:G:A	G	A	SNV	ZNF384	jaspar2022	MA1125.1	MA1125.1	gcgagctgcacAcactgcgcagg	0.325079	0.48258	4.14162	6.07166	strong	1	1.93004	0.155496
chr4	7313478	chr4:7313478:C:G	C	G	SNV	SP1	jaspar2022	MA0079.5	MA0079.5	ggagcggaGatgctggg	0.746274	0.830726	9.89702	11.0123	strong	1	1.11526	0.0841852
chr10	14604574	chr10:14604574:A:G	A	G	SNV	CTCF	jaspar2022	MA1930.1	MA1930.1	ccagaaaggccgggcatccgcgccgggaggggcGccagccggggctgcagcgctcggcctccgggact	0.636889	0.664491	10.6358	11.063	weak	1	0.427214	0.0262806
chr5	154197539	chr5:154197539:A:G	A	G	SNV	ZNF24	jaspar2022	MA1124.1	MA1124.1	tgccctctgctgAgtgtagatagga	0.591002	0.481218	9.40852	7.72483	strong	1	-1.6837	-0.107371
chr9	63816930	chr9:63816930:A:T	A	T	SNV	SOX8	jaspar2022	MA0868.2	MA0868.2	acccaacatTttcccggag	0.672082	0.774337	6.11633	7.02296	strong	1	0.90663	0.100471
chr5	109485150	chr5:109485150:C:T	C	T	SNV	NFIC	jaspar2022	MA0161.2	MA0161.2	ggctcaaagcCaagtttggat	0.890804	0.728187	8.70067	7.14583	strong	1	-1.55484	-0.159557
chr22	19432326	chr22:19432326:G:T	G	T	SNV	ATF7	jaspar2022	MA0834.1	MA0834.1	aggcgcgctcccaTcacagggcgggga	0.469669	0.590228	7.64902	9.59792	strong	1	1.9489	0.120138
chr22	24837695	chr22:24837695:T:C	T	C	SNV	CTCF	jaspar2022	MA0139.1	MA0139.1	cccagatgctggcatcacCgctagaccaaggagccct	0.483726	0.612704	6.79084	8.53121	strong	1	1.74038	0.126506
chr4	3961300	chr4:3961300:T:A	T	A	SNV	NFIC	jaspar2022	MA0161.2	MA0161.2	ttttctgcctAatggtcagtt	0.582971	0.728754	5.75737	7.15125	strong	1	1.39388	0.143039
chr10	114875119	chr10:114875119:G:C	G	C	SNV	CTCF	jaspar2022	MA1929.1	MA1929.1	gctaagtgctgttgccaccagggactgcaggccGctctgcagccctggatgggctcagttccgaggg	0.73739	0.702852	10.2471	9.8054	weak	1	-0.441648	-0.0324618
chr14	90396859	chr14:90396859:G:T	G	T	SNV	OLIG2	jaspar2022	MA0678.1	MA0678.1	cccagcgtaTggccgccgc	0.699026	0.834991	8.01673	9.56203	strong	1	1.54531	0.13511
chr11	888957	chr11:888957:G:A	G	A	SNV	TCF12	jaspar2022	MA1648.1	MA1648.1	ccctccagacAgctggacgcg	0.6171	0.726309	5.35303	6.26793	strong	1	0.914897	0.106871
chrX	11111210	chrX:11111210:G:A	G	A	SNV	SP4	jaspar2022	MA0685.2	MA0685.2	gaggggacGgaacccgc	0.676639	0.625007	8.83832	8.16524	weak	1	-0.673082	-0.0515626
chr10	114875132	chr10:114875132:G:A	G	A	SNV	CTCF	jaspar2022	MA0139.1	MA0139.1	aggccgctctgcagccctAgatgggctcagttccgag	0.589816	0.692491	8.22237	9.60781	strong	1	1.38544	0.100706
chr9	63817332	chr9:63817332:T:C	T	C	SNV	NR2F1	jaspar2022	MA1538.1	MA1538.1	agaggcggaggagtTgagccacagaaagg	0.560742	0.519605	9.21852	8.55399	weak	1	-0.664531	-0.0407329
chr15	90706567	chr15:90706567:C:T	C	T	SNV	NFIC	jaspar2022	MA1527.1	MA1527.1	ggccctgattcctgggCtgcatgccagggaaca	0.881892	0.785131	15.1857	13.5323	strong	1	-1.65339	-0.0961059
chr6	188878	chr6:188878:T:C	T	C	SNV	CTCF	jaspar2022	MA0139.1	MA0139.1	atttcagcctccaggtggCtccccgactcctttcccc	0.83081	0.888858	11.4742	12.2575	strong	1	0.783266	0.056935
chr4	186204274	chr4:186204274:C:T	C	T	SNV	CREB1	jaspar2022	MA0018.4	MA0018.4	tggcgtaagacgTggcggtggagac	0.443912	0.528772	4.71476	5.56795	strong	1	0.853193	0.0827881
chr4	100929253	chr4:100929253:G:T	G	T	SNV	NFIC	jaspar2022	MA1527.1	MA1527.1	ccatgataggccatctGccagctagggaaagaa	0.880491	0.763706	15.1618	13.1662	strong	1	-1.99554	-0.115994
chr11	128893278	chr11:128893278:C:T	C	T	SNV	ZNF24	jaspar2022	MA1124.1	MA1124.1	cctggggcacagTgtatgtgcttct	0.47915	0.575858	7.69311	9.17627	strong	1	1.48316	0.0945827
chr13	103329103	chr13:103329103:G:C	G	C	SNV	CTCF	jaspar2022	MA0139.1	MA0139.1	tttatgctgccatcttgaGttggaattccacagagta	0.800079	0.661167	11.0596	9.18514	strong	1	-1.87442	-0.13625
chr2	181844722	chr2:181844722:T:C	T	C	SNV	CTCF	jaspar2022	MA1930.1	MA1930.1	gaagatgtttttttggttgtcacaacaagggggTggagtactcctggcatctcataggcagaggacag	0.643925	0.602865	10.7447	10.1092	weak	1	-0.635505	-0.0390939
chr2	231614010	chr2:231614010:C:A	C	A	SNV	SRF	jaspar2022	MA0083.3	MA0083.3	ggtggcggccagacgAaactcggcacaggcg	0.443749	0.517122	8.59963	9.98946	strong	1	1.38984	0.0726288
chr7	66413607	chr7:66413607:G:A	G	A	SNV	MAZ	jaspar2022	MA1522.1	MA1522.1	tgcgggggagGggggcctggg	0.999948	0.865226	13.383	11.5911	strong	1	-1.79186	-0.133884
chr19	46579780	chr19:46579780:C:T	C	T	SNV	CTCF	jaspar2022	MA1930.1	MA1930.1	tggtcggctgtcatcttcacttcatcagagcgcCcactggtgggtaatgagagaacagcagggctatc	0.749782	0.703012	12.3831	11.6592	strong	1	-0.723884	-0.0445307
chr17	15699586	chr17:15699586:T:G	T	G	SNV	NEUROD1	jaspar2022	MA1109.1	MA1109.1	gctcttcgatcgGccgattctccca	0.581006	0.655793	6.49178	7.30867	strong	1	0.816891	0.073804
chr14	24232410	chr14:24232410:A:C	A	C	SNV	SOX8	jaspar2022	MA0868.2	MA0868.2	cccccccccActgggttcc	0.545411	0.499811	4.99322	4.58891	weak	1	-0.404304	-0.0448044
chr1	1746440	chr1:1746440:A:G	A	G	SNV	RELB	jaspar2022	MA1117.1	MA1117.1	aaggggggggAaccgtggccc	0.878744	0.771774	7.90936	6.97585	strong	1	-0.933517	-0.104099
chr22	20285881	chr22:20285881:A:G	A	G	SNV	NR2F1	jaspar2022	MA1538.1	MA1538.1	ggtgagtgccggccActcagttctgtggc	0.579592	0.53646	9.52303	8.82627	weak	1	-0.696759	-0.0427084
chrX	135098909	chrX:135098909:C:A	C	A	SNV	SP1	jaspar2022	MA0079.5	MA0079.5	ccccgcccCccagcata	1	0.883901	13.2477	11.7145	strong	1	-1.53318	-0.115732
chr19	47515603	chr19:47515603:A:G	A	G	SNV	RELB	jaspar2022	MA1117.1	MA1117.1	ggccagtactGgaactgcttt	0.458017	0.60734	4.23771	5.54084	strong	1	1.30313	0.145316
chr2	90392334	chr2:90392334:T:C	T	C	SNV	SOX8	jaspar2022	MA0868.2	MA0868.2	aatcatcatTgaatggaat	0.726705	0.560792	6.60063	5.12959	strong	1	-1.47104	-0.163019
chr15	91104210	chr15:91104210:T:G	T	G	SNV	MITF	jaspar2022	MA0620.3	MA0620.3	agttctgcagttctgagGtgtgcttgcttgatttc	0.570473	0.631389	6.5447	7.22077	weak	1	0.676063	0.0597669
chr20	19628817	chr20:19628817:C:A	C	A	SNV	CTCF	jaspar2022	MA0139.1	MA0139.1	gcccagagatgatgcaacAgctgggaagatttgagag	0.645312	0.720476	8.97121	9.98543	strong	1	1.01422	0.0737231
chr17	8187588	chr17:8187588:C:T	C	T	SNV	SP1	jaspar2022	MA0079.5	MA0079.5	tttcgtagCaactggcc	0.524458	0.464957	6.96777	6.18202	strong	1	-0.78575	-0.0593123
chr14	75496051	chr14:75496051:G:A	G	A	SNV	NFIC	jaspar2022	MA1527.1	MA1527.1	gggttgtccagagctgGcaagcttccaaatgtg	0.904707	0.791716	15.5756	13.6448	strong	1	-1.93071	-0.112226
chr3	127455746	chr3:127455746:G:T	G	T	SNV	NFIC	jaspar2022	MA1527.1	MA1527.1	ccgcccccagagcgccTcgccgcagccgagcgg	0.56923	0.604603	9.84316	10.4476	weak	1	0.604431	0.0351334
chr1	203402861	chr1:203402861:G:A	G	A	SNV	SP1	jaspar2022	MA0079.5	MA0079.5	agtttccaGggtcacat	0.501505	0.418051	6.66466	5.56258	strong	1	-1.10208	-0.0831903
chr4	7068348	chr4:7068348:G:T	G	T	SNV	MEF2A	jaspar2022	MA0052.4	MA0052.4	cggggccagcgccgTggtggggcgcgcgc	0.245589	0.324106	2.80376	3.60293	strong	1	0.799169	0.0762396
chr1	144102685	chr1:144102685:G:T	G	T	SNV	ZNF384	jaspar2022	MA1125.1	MA1125.1	gctggctggctTgctggctggct	0.321309	0.48169	4.09542	6.06075	strong	1	1.96533	0.158339
chr7	4960457	chr7:4960457:C:T	C	T	SNV	CTCF	jaspar2022	MA1929.1	MA1929.1	cctaccgcctgcctgtggcttgcttgctcccccTactgcctggctccctactgccacgtccctgcta	0.720598	0.753217	10.0323	10.4494	weak	1	0.417118	0.0306588
chr1	175755086	chr1:175755086:G:C	G	C	SNV	CLOCK	jaspar2022	MA0819.2	MA0819.2	ggaatagcaCagttggaag	0.575086	0.732985	5.62969	7.15928	strong	1	1.52959	0.156947
chr17	78175249	chr17:78175249:C:T	C	T	SNV	CTCF	jaspar2022	MA1929.1	MA1929.1	tgggtttttcttttaaaccctctgattcacaagTactgaagccaggagagtttgctctgaccttagt	0.532267	0.577796	7.62406	8.20625	weak	1	0.582197	0.0427924
chr1	16709920	chr1:16709920:T:C	T	C	SNV	SOX8	jaspar2022	MA0868.2	MA0868.2	gctgggctgTtgggtgtga	0.655159	0.598489	5.96629	5.46382	weak	1	-0.502462	-0.055682
chr9	63817564	chr9:63817564:T:G	T	G	SNV	CREB1	jaspar2022	MA0018.4	MA0018.4	gaatgctttcttGtcattgttgaca	0.596902	0.73778	6.25294	7.66935	strong	1	1.41642	0.137439
chr3	4826516	chr3:4826516:T:C	T	C	SNV	NFIC	jaspar2022	MA0161.2	MA0161.2	ctggaaacagCgtgtcagcgt	0.570725	0.700795	5.64028	6.88392	strong	1	1.24365	0.127623
chr6	158814293	chr6:158814293:C:G	C	G	SNV	CTCF	jaspar2022	MA0139.1	MA0139.1	cgcgtgcgccccccagccGtcaagcaagattcagctg	0.613999	0.745715	8.54869	10.326	strong	1	1.77731	0.129191
chr11	72041114	chr11:72041114:T:G	T	G	SNV	SP1	jaspar2022	MA0079.5	MA0079.5	gagcgatcGtcctggct	0.465556	0.505442	6.18992	6.71665	weak	1	0.526731	0.0397602
chr4	1051037	chr4:1051037:C:G	C	G	SNV	SP1	jaspar2022	MA0079.5	MA0079.5	agcgccctCcagtgttg	0.641046	0.501592	8.50741	6.6658	strong	1	-1.8416	-0.139013
chr8	96495297	chr8:96495297:C:T	C	T	SNV	NR2F1	jaspar2022	MA1537.1	MA1537.1	cagcttccctccccTgccctggcggtggg	0.516693	0.613659	9.6328	11.4295	strong	1	1.79671	0.0966591
chr6	44133807	chr6:44133807:C:T	C	T	SNV	MAZ	jaspar2022	MA1522.1	MA1522.1	cccagccttcCctgcttcaga	0.720085	0.576332	9.6607	7.74874	strong	1	-1.91197	-0.142858
chr6	34097546	chr6:34097546:G:C	G	C	SNV	MAZ	jaspar2022	MA1522.1	MA1522.1	cacacaaccaCcccaggcatg	0.576485	0.696428	7.75078	9.34606	strong	1	1.59529	0.119196
chr20	30813929	chr20:30813929:G:T	G	T	SNV	SRF	jaspar2022	MA0083.3	MA0083.3	aacccggggccgcgaTgctgggatcaggcac	0.451258	0.478375	8.74185	9.2555	weak	1	0.513651	0.0268419
chr9	63817506	chr9:63817506:C:T	C	T	SNV	TBR1	jaspar2022	MA0802.1	MA0802.1	tagacagccCacctccctg	0.69911	0.564088	7.87474	6.3859	strong	1	-1.48884	-0.13302
chr12	80473053	chr12:80473053:A:G	A	G	SNV	CTCF	jaspar2022	MA1930.1	MA1930.1	tatacacacacacacactcacacacacgcacacGcacacacacacacacacacacacaggtcatacat	0.422958	0.520244	7.32463	8.8304	strong	1	1.50576	0.0926289
chr1	153617778	chr1:153617778:C:A	C	A	SNV	CTCF	jaspar2022	MA0139.1	MA0139.1	agatgcccgcccctgctcCctctggtggtggccgtgt	0.905807	0.775276	12.4862	10.7249	strong	1	-1.76133	-0.12803
chr12	131622127	chr12:131622127:G:T	G	T	SNV	SOX8	jaspar2022	MA0868.2	MA0868.2	ctgtcctggTggagggaag	0.417987	0.58336	3.86343	5.32969	strong	1	1.46626	0.162489
chr7	75572587	chr7:75572587:C:A	C	A	SNV	CREM	jaspar2022	MA0609.2	MA0609.2	gatggcctgccactgAcatcatgccagctgc	0.71629	0.856078	7.21785	8.5585	strong	1	1.34065	0.13489
chr9	7370679	chr9:7370679:C:T	C	T	SNV	SP1	jaspar2022	MA0079.5	MA0079.5	cctctcccCaacttctt	0.853035	0.731022	11.3069	9.6956	strong	1	-1.61128	-0.121627
chr12	25804262	chr12:25804262:A:G	A	G	SNV	MITF	jaspar2022	MA0620.3	MA0620.3	ctacagcttgcccaagaGgatgcaaagaagatggc	0.511663	0.57176	5.89202	6.55899	weak	1	0.666972	0.0589633
chr22	41286010	chr22:41286010:G:T	G	T	SNV	CTCF	jaspar2022	MA0139.1	MA0139.1	caggcggcgccgccgcgtGgggggaatcgagcgcgcg	0.832966	0.735012	11.5033	10.1816	strong	1	-1.32175	-0.0960769
chr3	33440327	chr3:33440327:G:T	G	T	SNV	NEUROD1	jaspar2022	MA1109.1	MA1109.1	ccacaccgccccTgccaaccccgcc	0.542439	0.646675	6.07051	7.20906	strong	1	1.13855	0.102865
chr9	134449754	chr9:134449754:T:C	T	C	SNV	SP1	jaspar2022	MA0079.5	MA0079.5	cagtgtcaCcctgcaga	0.459784	0.607347	6.11369	8.06238	strong	1	1.94869	0.147097
chr15	24773224	chr15:24773224:C:G	C	G	SNV	FOXK2	jaspar2022	MA1103.2	MA1103.2	tggccggcagCagccgatcca	0.483882	0.375556	4.43435	3.48823	strong	1	-0.94612	-0.105805
chr2	240561257	chr2:240561257:C:G	C	G	SNV	OLIG2	jaspar2022	MA0678.1	MA0678.1	ccactcttaCagctgggcc	0.576889	0.507443	6.62859	5.83931	strong	1	-0.789283	-0.0690088
chr1	209590628	chr1:209590628:A:G	A	G	SNV	CTCF	jaspar2022	MA1930.1	MA1930.1	ctggagaacaggccgtcattccatggaagctccAgaagagggagtgatggacgcctggctcttggtcc	0.779111	0.746598	12.837	12.3338	weak	1	-0.503231	-0.0309569
chr5	95735111	chr5:95735111:G:A	G	A	SNV	MEIS2	jaspar2022	MA0774.1	MA0774.1	actgaatGagctgtg	0.594536	0.505188	6.09518	5.19683	strong	1	-0.898349	-0.0883168
chr15	101480488	chr15:101480488:C:T	C	T	SNV	SOX8	jaspar2022	MA0868.2	MA0868.2	aaccctaggTtgctgatcc	0.491809	0.633594	4.51796	5.77508	strong	1	1.25712	0.139312
chr7	37492113	chr7:37492113:A:G	A	G	SNV	CTCF	jaspar2022	MA0139.1	MA0139.1	gaggcgcgggccggagccGgagccagagctagagcca	0.606107	0.701747	8.44218	9.73271	strong	1	1.29053	0.0938074
chr4	180449584	chr4:180449584:G:A	G	A	SNV	CTCF	jaspar2022	MA0139.1	MA0139.1	ctttagagggcgcaagttGgctgccagctccctgctg	0.743629	0.696432	10.2979	9.661	weak	1	-0.636852	-0.0462922
chr9	63817506	chr9:63817506:C:T	C	T	SNV	KLF5	jaspar2022	MA0599.1	MA0599.1	tagacagccCacctccctg	0.865437	0.770372	9.94099	8.85277	strong	1	-1.08822	-0.0947813
chr14	73058568	chr14:73058568:A:G	A	G	SNV	TBR1	jaspar2022	MA0802.1	MA0802.1	cgcggctgtGtttgcggcc	0.537374	0.590871	6.09133	6.68122	weak	1	0.589889	0.0527037
chr1	153613108	chr1:153613108:G:A	G	A	SNV	NEUROD1	jaspar2022	MA1109.1	MA1109.1	ctgagctggctcAgtggggagatag	0.557945	0.722212	6.23988	8.03414	strong	1	1.79426	0.162107
chr3	197547814	chr3:197547814:C:T	C	T	SNV	CTCF	jaspar2022	MA0139.1	MA0139.1	ccaagaactccttgcccaCgtgagggcgttcctgcct	0.833149	0.802311	11.5058	11.0897	weak	1	-0.416114	-0.030247
chr3	13076499	chr3:13076499:G:A	G	A	SNV	MEF2A	jaspar2022	MA0052.4	MA0052.4	ccccaaggtgggagAaacatgacagcatt	0.514578	0.620288	5.5416	6.61754	strong	1	1.07594	0.102644
chr9	63817506	chr9:63817506:C:T	C	T	SNV	EGR1	jaspar2022	MA0162.4	MA0162.4	gcagtagacagccCacctccctgtacc	0.735094	0.678688	7.62495	7.06349	weak	1	-0.561457	-0.0547134
chr3	2218560	chr3:2218560:A:G	A	G	SNV	NFIC	jaspar2022	MA1527.1	MA1527.1	aaaaaaaagttttttgGcacatagccaagtcta	0.885143	0.998134	15.2413	17.172	strong	1	1.93071	0.112226
chr19	588261	chr19:588261:C:G	C	G	SNV	NFIC	jaspar2022	MA0161.2	MA0161.2	cgggttctgcCggcgcctgca	0.583901	0.474873	5.76626	4.7238	strong	1	-1.04246	-0.106977
chr6	170185437	chr6:170185437:C:T	C	T	SNV	SP1	jaspar2022	MA0079.5	MA0079.5	ttagaggcCgcccagtg	0.76691	0.619346	10.1695	8.22084	strong	1	-1.94869	-0.147097
chr9	128193027	chr9:128193027:C:T	C	T	SNV	SP1	jaspar2022	MA0079.5	MA0079.5	aattcgcgCgtccataa	0.55468	0.484885	7.36688	6.44517	strong	1	-0.921707	-0.069575
chr15	63916681	chr15:63916681:C:T	C	T	SNV	CTCF	jaspar2022	MA0139.1	MA0139.1	ctgtgagcctgaaggctgCcccctacagtgaacaagc	0.816449	0.745977	11.2805	10.3295	strong	1	-0.950917	-0.0691214
chr12	50283651	chr12:50283651:G:C	G	C	SNV	CTCF	jaspar2022	MA1929.1	MA1929.1	gctacgtgcccagcgctcgcgtctgctccagtcCctctggcggtgcggggcgctggcgacgggacag	0.615984	0.6712	8.69459	9.40065	strong	1	0.706067	0.051897
chr9	129607471	chr9:129607471:T:G	T	G	SNV	CTCF	jaspar2022	MA1929.1	MA1929.1	cccacacggctgggagccagggtgtgtggtgtgGggtgtggtgtgtgtgtgtgtgtgtgtgtgtgtg	0.482582	0.537583	6.98872	7.69204	strong	1	0.703314	0.0516947
chr1	40308522	chr1:40308522:A:C	A	C	SNV	SOX8	jaspar2022	MA0868.2	MA0868.2	ggccccacaAtccactcag	0.898167	0.717849	8.12088	6.52212	strong	1	-1.59877	-0.177173
chr9	89436540	chr9:89436540:C:T	C	T	SNV	ATF7	jaspar2022	MA0834.1	MA0834.1	aggcacccttcagTgcagggacaaggt	0.458458	0.484204	7.46778	7.88399	weak	1	0.416204	0.0256566
chr14	96263805	chr14:96263805:A:G	A	G	SNV	MEIS2	jaspar2022	MA0774.1	MA0774.1	tgctgccAacattta	0.854034	0.723641	8.70428	7.39325	strong	1	-1.31103	-0.128887
chr16	57116066	chr16:57116066:C:T	C	T	SNV	NR2F2	jaspar2022	MA1111.1	MA1111.1	tgagcccacgTgatgcctggg	0.472495	0.635735	4.9693	6.63853	strong	1	1.66923	0.16107
chr6	41683709	chr6:41683709:C:G	C	G	SNV	CTCF	jaspar2022	MA0139.1	MA0139.1	ctcgccacatcaactagtGtcgctccggccgccgctg	0.601881	0.698134	8.38516	9.68397	strong	1	1.2988	0.094409
chr11	64653029	chr11:64653029:T:A	T	A	SNV	FOXK2	jaspar2022	MA1103.2	MA1103.2	accacgtgcaTgtgctccccc	0.535498	0.483388	4.88516	4.43003	weak	1	-0.455126	-0.0508969
chr2	146949550	chr2:146949550:G:A	G	A	SNV	NFIC	jaspar2022	MA0161.2	MA0161.2	attgattgcaAgaaatacata	0.557905	0.699505	5.5177	6.87159	strong	1	1.35388	0.138935
chr1	54887409	chr1:54887409:C:G	C	G	SNV	MAZ	jaspar2022	MA1522.1	MA1522.1	gtgccagggaGtgggtgccgg	0.73252	0.862286	9.8261	11.552	strong	1	1.72595	0.128959
chr5	181206858	chr5:181206858:G:C	G	C	SNV	RELB	jaspar2022	MA1117.1	MA1117.1	gagagctgctGagagtaggtg	0.55849	0.492071	5.11452	4.53489	weak	1	-0.579629	-0.0646363
chr16	8682700	chr16:8682700:A:G	A	G	SNV	NFIC	jaspar2022	MA1527.1	MA1527.1	tattatcttggatatcGgcaacttgccagcact	0.764877	0.881661	13.1862	15.1818	strong	1	1.99554	0.115994
chr11	18145219	chr11:18145219:C:A	C	A	SNV	CTCF	jaspar2022	MA0139.1	MA0139.1	agccgccttgggctccccCtactgtcatagccactct	0.834206	0.694433	11.5201	9.63402	strong	1	-1.88604	-0.137095
chr3	133377029	chr3:133377029:A:G	A	G	SNV	CTCF	jaspar2022	MA0139.1	MA0139.1	ctgccgtgtcctcacatgGtcatccctctgtgcacac	0.662468	0.741373	9.2027	10.2674	strong	1	1.06471	0.0773926
chr4	156378298	chr4:156378298:C:G	C	G	SNV	CTCF	jaspar2022	MA1930.1	MA1930.1	tgctaacctggcaactccatactattctgccccCttgagaaggaatggaagtactgcgcccctataag	0.834092	0.718081	13.688	11.8924	strong	1	-1.79557	-0.110457
chr2	119291153	chr2:119291153:A:G	A	G	SNV	CTCF	jaspar2022	MA0139.1	MA0139.1	cgtaacgaggctctgctaGtatggcaggaaaggtgtc	0.486848	0.517686	6.83297	7.24908	weak	1	0.416114	0.030247
chr19	50329176	chr19:50329176:C:T	C	T	SNV	CTCF	jaspar2022	MA0139.1	MA0139.1	ggaggaggagcgaggtagTgggggcgtggcttagggg	0.565979	0.613123	7.90072	8.53687	weak	1	0.636151	0.0462413
chr14	38578060	chr14:38578060:T:C	T	C	SNV	NFIC	jaspar2022	MA1527.1	MA1527.1	gttggttggcctctagCcaggaagtggcacttt	0.847316	0.960306	14.5949	16.5256	strong	1	1.93071	0.112226
chr21	10805721	chr21:10805721:G:T	G	T	SNV	TBR1	jaspar2022	MA0802.1	MA0802.1	catcacaaaTaagtttctc	0.640242	0.741152	7.22563	8.33832	strong	1	1.11269	0.0994137
chr22	45437141	chr22:45437141:T:G	T	G	SNV	CTCF	jaspar2022	MA1930.1	MA1930.1	gtgcgagcgcacggcgcgggactagcaggcagcGccacctgcagccccggtgcggaatccactggatg	0.700706	0.728071	11.6235	12.047	weak	1	0.423538	0.0260545
chr6	2480430	chr6:2480430:G:T	G	T	SNV	SOX8	jaspar2022	MA0868.2	MA0868.2	gattttattGttgcctgga	0.97093	0.797851	8.76602	7.23144	strong	1	-1.53458	-0.17006
chr11	658618	chr11:658618:C:T	C	T	SNV	OLIG2	jaspar2022	MA0678.1	MA0678.1	ctgcccaggTgccccaaga	0.484289	0.583053	5.57616	6.69865	strong	1	1.1225	0.0981423
chr3	36197352	chr3:36197352:G:A	G	A	SNV	NFIC	jaspar2022	MA0161.2	MA0161.2	aaatatcctgGcacccccttg	0.855732	0.699612	8.36534	6.87261	strong	1	-1.49273	-0.153183
chr2	203581026	chr2:203581026:C:T	C	T	SNV	CLOCK	jaspar2022	MA0819.2	MA0819.2	ctggaagcaCgtgcagctg	0.965977	0.857742	9.41632	8.36783	strong	1	-1.04849	-0.107583
chr10	45282240	chr10:45282240:T:A	T	A	SNV	CTCF	jaspar2022	MA1929.1	MA1929.1	taaccaatctttgttatcccaaaaaagtccagaAgatggtgactgctgcgtgatttgagagctatta	0.768586	0.816831	10.646	11.2629	weak	1	0.616931	0.0453454
chr7	158856589	chr7:158856589:T:C	T	C	SNV	NFIC	jaspar2022	MA1527.1	MA1527.1	gcacgctgggcagtgcCtctgggccctctgctg	0.582492	0.685545	10.0698	11.8307	strong	1	1.76089	0.102354
chr3	42072566	chr3:42072566:C:T	C	T	SNV	ZNF24	jaspar2022	MA1124.1	MA1124.1	ttttttttttttCtttctctttttc	0.634805	0.535998	10.0803	8.56496	strong	1	-1.51536	-0.096636
chr7	99472792	chr7:99472792:G:T	G	T	SNV	SP1	jaspar2022	MA0079.5	MA0079.5	tcgcgcggGcgccactc	0.679972	0.635132	9.02146	8.4293	weak	1	-0.592154	-0.0446987
chr8	141029896	chr8:141029896:C:T	C	T	SNV	ZNF143	jaspar2022	MA0088.2	MA0088.2	gcccagcaggctgttTgagtaaatcagccat	0.530165	0.577371	10.3658	11.2837	strong	1	0.917914	0.0470686
chr7	78062422	chr7:78062422:G:A	G	A	SNV	NFIC	jaspar2022	MA0161.2	MA0161.2	cattgcgccaAtcctctccac	0.616117	0.759856	6.07429	7.44863	strong	1	1.37434	0.141034
chr4	87839536	chr4:87839536:C:A	C	A	SNV	CTCF	jaspar2022	MA1929.1	MA1929.1	agttgctgtcttcgggagccggctgacacacacCctcctgtggttataagaagtactaccatttgtc	0.756327	0.644781	10.4892	9.06283	strong	1	-1.42637	-0.104841
chr15	84845785	chr15:84845785:G:T	G	T	SNV	CTCF	jaspar2022	MA0139.1	MA0139.1	tagcactgcaggccgggtGtggtggctcatgcctgta	0.623413	0.587229	8.6757	8.18747	weak	1	-0.488239	-0.0354897
chr6	47414277	chr6:47414277:C:G	C	G	SNV	CTCF	jaspar2022	MA1930.1	MA1930.1	tttgaataacttattcctatataccacagttttCagtcaagtattcttacctcaggaagggcatgtat	0.702937	0.641761	11.658	10.7112	strong	1	-0.946849	-0.0582467
chr14	63212991	chr14:63212991:C:A	C	A	SNV	NFIC	jaspar2022	MA0161.2	MA0161.2	caccatctgcCacctaacagc	0.72716	0.562614	7.13601	5.56272	strong	1	-1.57329	-0.16145
chr18	9334523	chr18:9334523:T:A	T	A	SNV	CTCF	jaspar2022	MA1929.1	MA1929.1	cgtggcctgcgggccggcgggcgggcgggagccTgcggtggaggcgtggcacgagggaggggcgaaa	0.729277	0.687612	10.1433	9.61052	weak	1	-0.532793	-0.0391611
chr12	124914631	chr12:124914631:A:C	A	C	SNV	SP4	jaspar2022	MA0685.2	MA0685.2	cgacccaaCtcccggct	0.634088	0.783575	8.28362	10.2324	strong	1	1.94873	0.149286
chr6	33702593	chr6:33702593:G:A	G	A	SNV	CTCF	jaspar2022	MA0139.1	MA0139.1	ctgctggaccttctcaggGagacaggcagcatacaga	0.740741	0.661836	10.2589	9.19417	strong	1	-1.06471	-0.0773926
chrX	119853214	chrX:119853214:T:C	T	C	SNV	NEUROD1	jaspar2022	MA1109.1	MA1109.1	cgtcattagcaaCtccgccatcttg	0.503576	0.614884	5.64602	6.86182	strong	1	1.2158	0.109844
chr16	86985201	chr16:86985201:C:T	C	T	SNV	OLIG2	jaspar2022	MA0678.1	MA0678.1	ctgagcagcTgtcagagcc	0.518474	0.623584	5.96468	7.1593	strong	1	1.19462	0.104448
chr19	6460648	chr19:6460648:A:T	A	T	SNV	CTCF	jaspar2022	MA0139.1	MA0139.1	gcagtttctcgatccaccAttagggggaagggagccc	0.872861	0.816401	12.0416	11.2798	strong	1	-0.761844	-0.0553778
chr11	65857091	chr11:65857091:A:C	A	C	SNV	SRF	jaspar2022	MA0083.3	MA0083.3	gggcccggccccctcCccaatgcagaaacgc	0.451911	0.551411	8.75422	10.639	strong	1	1.88473	0.0984905
chr12	22592724	chr12:22592724:G:C	G	C	SNV	CTCF	jaspar2022	MA1929.1	MA1929.1	tgggataacttaaaaaaaataactgatagagggCgatagagagaaagaaagcagctgagaaaagggg	0.536831	0.572421	7.68243	8.13753	weak	1	0.455101	0.0334506
chr8	41512374	chr8:41512374:G:A	G	A	SNV	CTCF	jaspar2022	MA1930.1	MA1930.1	gggtcaagctggaggctgagatcgccacctaccGccgcctgctggaagacagcgagggcctcaatctt	0.815637	0.788035	13.4024	12.9751	weak	1	-0.427214	-0.0262806
chr4	38170731	chr4:38170731:T:C	T	C	SNV	NFIC	jaspar2022	MA0161.2	MA0161.2	gattatttggCaaatttccaa	0.730893	0.869912	7.1717	8.50092	strong	1	1.32922	0.136404
chr1	155135811	chr1:155135811:G:A	G	A	SNV	NR3C1	jaspar2022	MA0113.3	MA0113.3	gggggcggagccgagtGcgcggggcggggctcc	0.613086	0.518298	10.5913	8.97266	strong	1	-1.61869	-0.0941171
chrX	149540994	chrX:149540994:C:T	C	T	SNV	PKNOX1	jaspar2022	MA0782.2	MA0782.2	cgtgaaagggatgaCgggagctgtatgaa	0.701388	0.558818	7.67498	6.17831	strong	1	-1.49667	-0.138456
chr2	129698741	chr2:129698741:C:T	C	T	SNV	NFIC	jaspar2022	MA0161.2	MA0161.2	accccaacccTggcacacagc	0.713932	0.855087	7.00953	8.35917	strong	1	1.34964	0.138499
chr9	134024985	chr9:134024985:C:G	C	G	SNV	MAZ	jaspar2022	MA1522.1	MA1522.1	tcctcagcccCttctcctctg	0.838883	0.709117	11.2408	9.51483	strong	1	-1.72595	-0.128959
chr19	51334090	chr19:51334090:C:T	C	T	SNV	NR2F1	jaspar2022	MA1537.1	MA1537.1	gcaggatggatgacCtatgacggcactga	0.83214	0.725741	15.4778	13.5063	strong	1	-1.97149	-0.106062
chr10	132249164	chr10:132249164:G:C	G	C	SNV	MAZ	jaspar2022	MA1522.1	MA1522.1	gcgtgcagggGgcggggctat	0.857234	0.72337	11.4848	9.70441	strong	1	-1.78044	-0.13303
chr19	56839696	chr19:56839696:A:G	A	G	SNV	FOXK2	jaspar2022	MA1103.2	MA1103.2	tggggctggaAcagaccatta	0.599914	0.53827	5.44777	4.90937	weak	1	-0.538394	-0.0602088
chr11	47412337	chr11:47412337:C:A	C	A	SNV	ZBTB7B	jaspar2022	MA0694.1	MA0694.1	ggcattgccgcCccctgcaggtg	0.741604	0.585568	9.2523	7.3403	strong	1	-1.912	-0.153963
chr4	44678340	chr4:44678340:C:G	C	G	SNV	SP1	jaspar2022	MA0079.5	MA0079.5	tagggagtGaatcgaaa	0.630213	0.662752	8.36434	8.79405	weak	1	0.429707	0.0324364
chr2	231017403	chr2:231017403:G:A	G	A	SNV	NEUROD1	jaspar2022	MA1109.1	MA1109.1	ttgtctacatccGgagagagtgccc	0.72637	0.678316	8.07957	7.55468	weak	1	-0.524891	-0.0474226
chr4	28277939	chr4:28277939:G:T	G	T	SNV	SOX8	jaspar2022	MA0868.2	MA0868.2	ccagtgattGtctttgtga	0.904608	0.816544	8.17799	7.39719	strong	1	-0.780805	-0.0865275
chr7	36127575	chr7:36127575:C:T	C	T	SNV	CTCF	jaspar2022	MA0139.1	MA0139.1	tgctataccactgaaaacCacttgaggaccctagaga	0.753345	0.668329	10.429	9.28178	strong	1	-1.14717	-0.0833871
chr16	75403089	chr16:75403089:A:G	A	G	SNV	NFIC	jaspar2022	MA1527.1	MA1527.1	aaattgagaaaacagcAgacgccctgaataccc	0.53066	0.47829	9.1841	8.28924	strong	1	-0.894859	-0.052015
chr8	83825137	chr8:83825137:C:T	C	T	SNV	CTCF	jaspar2022	MA0139.1	MA0139.1	tgagctaaatagcgacacCtggtggctaaaaaaatag	0.919229	0.779766	12.6673	10.7855	strong	1	-1.88185	-0.13679
chr1	204412110	chr1:204412110:G:T	G	T	SNV	CREB1	jaspar2022	MA0018.4	MA0018.4	cgtttctgtgtgGtctcctaggaga	0.662056	0.571256	6.90801	5.99509	strong	1	-0.912919	-0.0885835
chr20	6053801	chr20:6053801:G:A	G	A	SNV	SRF	jaspar2022	MA0083.3	MA0083.3	cctgaagccaggagcAtgtgcacccagcagt	0.380039	0.426855	7.39282	8.27961	strong	1	0.886787	0.0463409
chr8	13655257	chr8:13655257:C:T	C	T	SNV	CTCF	jaspar2022	MA1930.1	MA1930.1	cttcagttataatttaaatgagacattgccctcTagaggtcttctaaaagaactgacctggacaagat	0.721335	0.778679	11.9428	12.8303	strong	1	0.887545	0.0545985
chr9	111525118	chr9:111525118:C:A	C	A	SNV	MEF2A	jaspar2022	MA0052.4	MA0052.4	ggactttcggaaagAtgcacgagcgcgtt	0.432417	0.579297	4.70535	6.20033	strong	1	1.49498	0.142619
chr17	43766611	chr17:43766611:C:G	C	G	SNV	CTCF	jaspar2022	MA1930.1	MA1930.1	atcaccatgggtggaaggcagcgccacctgctgGccatcatattatggctcacatacccataatttcc	0.776669	0.823782	12.7992	13.5284	strong	1	0.729204	0.0448579
chr7	45769154	chr7:45769154:A:G	A	G	SNV	CREB1	jaspar2022	MA0018.4	MA0018.4	gggcgctacagtGcctggagctggg	0.462462	0.57578	4.90126	6.04057	strong	1	1.13931	0.110551
chr8	101667940	chr8:101667940:C:T	C	T	SNV	NFIC	jaspar2022	MA1527.1	MA1527.1	cagctcagctctgagtTggcaggctggggcttc	0.520293	0.635436	9.00696	10.9744	strong	1	1.96749	0.114363
chr16	53681170	chr16:53681170:C:T	C	T	SNV	NFIC	jaspar2022	MA1527.1	MA1527.1	tgcgagatttgacagtTggctgtccgccaaagg	0.84854	0.963683	14.6158	16.5833	strong	1	1.96749	0.114363
chr11	18412293	chr11:18412293:C:T	C	T	SNV	CTCF	jaspar2022	MA0139.1	MA0139.1	cgtgctgacgcataagagCcgagcgggggaacgtgcg	0.703816	0.624911	9.76063	8.69593	strong	1	-1.06471	-0.0773926
chr9	15873736	chr9:15873736:A:G	A	G	SNV	CTCF	jaspar2022	MA1929.1	MA1929.1	atatctgtttttgaatgtttccatttatattatAtaaggaatattttctcatttgtccagaaggtgg	0.477247	0.431718	6.92049	6.33829	weak	1	-0.582197	-0.0427924
chr19	53538188	chr19:53538188:C:T	C	T	SNV	GATA4	jaspar2022	MA0482.2	MA0482.2	ggccctgtcccCgtaactgtgac	0.677674	0.624263	6.78812	6.27036	weak	1	-0.517759	-0.0522317
chr2	197453301	chr2:197453301:A:C	A	C	SNV	REST	jaspar2022	MA0138.2	MA0138.2	aaattgcgcgagcgcacgggAaaagcgattggtcggtcagg	0.582806	0.530652	12.0436	11.0047	strong	1	-1.03895	-0.0510427
chr7	145331258	chr7:145331258:G:C	G	C	SNV	CTCF	jaspar2022	MA1929.1	MA1929.1	taaagaaagaagatgggagcatgaggacacaagCcatctagtggtggatgcacggatttaagggttg	0.700401	0.756617	9.77406	10.4929	strong	1	0.718856	0.052837
chr2	90392334	chr2:90392334:T:C	T	C	SNV	ZNF24	jaspar2022	MA1124.1	MA1124.1	tggaatcatcatTgaatggaatcga	0.737217	0.640509	11.651	10.1678	strong	1	-1.48316	-0.0945827
chr1	39609695	chr1:39609695:A:G	A	G	SNV	CTCF	jaspar2022	MA0139.1	MA0139.1	gatggtgagcctggagccActgggagggcgccggcct	0.746941	0.68906	10.3425	9.56152	strong	1	-0.78102	-0.0567717
chr7	75739360	chr7:75739360:T:C	T	C	SNV	BHLHE41	jaspar2022	MA0636.1	MA0636.1	ccccgagcgTgctgccctc	0.598907	0.475656	8.64537	6.87057	strong	1	-1.77481	-0.12307
chr7	139500703	chr7:139500703:C:A	C	A	SNV	SRF	jaspar2022	MA0083.3	MA0083.3	ggtgggcctcggcagAgcgcgagcggcgatc	0.361162	0.432466	7.03524	8.3859	strong	1	1.35065	0.0705811
chr17	80968881	chr17:80968881:C:T	C	T	SNV	NFIB	jaspar2022	MA1643.1	MA1643.1	catggaatcctggaatcctgCgctgaattgcagtttgtttc	0.67416	0.561358	11.3737	9.53225	strong	1	-1.84144	-0.110313
chr6	29702779	chr6:29702779:G:A	G	A	SNV	CTCF	jaspar2022	MA0139.1	MA0139.1	agacggggctgaacctgaAgtcaaccacgctgagacg	0.551078	0.581121	7.69965	8.10504	weak	1	0.40539	0.0294675
chr13	21604119	chr13:21604119:C:T	C	T	SNV	NEUROD1	jaspar2022	MA1109.1	MA1109.1	ccaggccgccacCcgcgcgcagcta	0.709546	0.571201	7.8958	6.38468	strong	1	-1.51112	-0.136525
chr19	12766150	chr19:12766150:G:C	G	C	SNV	CLOCK	jaspar2022	MA0819.2	MA0819.2	atcctccagGtggcgctgc	0.837971	0.705973	8.17629	6.89761	strong	1	-1.27868	-0.131202
chr1	16535646	chr1:16535646:C:G	C	G	SNV	NR2F1	jaspar2022	MA1537.1	MA1537.1	accagtcggtcgtgGgtcgccaggtccgg	0.597777	0.704217	11.1352	13.1075	strong	1	1.97224	0.106102
chr19	9245844	chr19:9245844:G:T	G	T	SNV	NFIC	jaspar2022	MA0161.2	MA0161.2	cctcgtgactTggcctcatgc	0.745488	0.888758	7.31125	8.68111	strong	1	1.36986	0.140574
chr16	3443495	chr16:3443495:G:A	G	A	SNV	SP1	jaspar2022	MA0079.5	MA0079.5	ggagctgcGggaaaagc	0.672334	0.604064	8.92059	8.01903	strong	1	-0.901556	-0.0680539
chr22	48631527	chr22:48631527:G:C	G	C	SNV	CTCF	jaspar2022	MA0139.1	MA0139.1	tgctgtgagtgtccccagGtctccagctgtgcagtgt	0.641342	0.596275	8.91764	8.30952	weak	1	-0.608117	-0.0442035
chr4	156378298	chr4:156378298:C:G	C	G	SNV	CTCF	jaspar2022	MA0139.1	MA0139.1	tccatactattctgccccCttgagaaggaatggaagt	0.816197	0.675957	11.277	9.38472	strong	1	-1.89233	-0.137552
chr4	119861938	chr4:119861938:C:G	C	G	SNV	NFIC	jaspar2022	MA1527.1	MA1527.1	ctgggtggccttggctCacccagttcttcctcc	0.695851	0.579067	12.0068	10.0112	strong	1	-1.99554	-0.115994
chr2	238160555	chr2:238160555:C:T	C	T	SNV	CTCF	jaspar2022	MA1930.1	MA1930.1	aaggcacaaggaagcactgagcagcgctgagggCcctgggcccctgaaccctttctccgcccaaccac	0.521128	0.485322	8.84407	8.28989	weak	1	-0.554182	-0.0340912
chrX	131752600	chrX:131752600:G:T	G	T	SNV	EGR1	jaspar2022	MA0162.4	MA0162.4	gggagaaaagggcGccaagatagggat	0.638034	0.500187	6.65882	5.28671	strong	1	-1.37211	-0.133711
chr17	79074920	chr17:79074920:C:G	C	G	SNV	SP4	jaspar2022	MA0685.2	MA0685.2	tgcgattgCctctcggc	0.583168	0.535407	7.61982	6.9972	weak	1	-0.622622	-0.047697
chr9	40992038	chr9:40992038:G:A	G	A	SNV	NEUROD1	jaspar2022	MA1109.1	MA1109.1	ccccacgggaccAtcgccagcccgc	0.552307	0.650288	6.1783	7.24853	strong	1	1.07024	0.0966932
chr17	27879388	chr17:27879388:C:A	C	A	SNV	NFIC	jaspar2022	MA1527.1	MA1527.1	ccaacaaggccaatggCtcttccaaaccagctg	0.584762	0.476682	10.1086	8.26176	strong	1	-1.8468	-0.107348
chr14	105477746	chr14:105477746:C:T	C	T	SNV	SRF	jaspar2022	MA0083.3	MA0083.3	gtgtgtggaggcgggCgtgtgggggaggcgg	0.530605	0.504122	10.2448	9.7432	weak	1	-0.501645	-0.0262145
chr7	36127498	chr7:36127498:C:T	C	T	SNV	OLIG2	jaspar2022	MA0678.1	MA0678.1	agccagccaTaccaggaag	0.484695	0.660209	5.58077	7.57556	strong	1	1.99479	0.174409
chr19	50678416	chr19:50678416:G:T	G	T	SNV	NR2F1	jaspar2022	MA1537.1	MA1537.1	gcatggggcacgggTgcaggtggtggggg	0.59363	0.667547	11.0584	12.428	strong	1	1.36963	0.0736832
chr12	131622127	chr12:131622127:G:T	G	T	SNV	TCF12	jaspar2022	MA1648.1	MA1648.1	gctgtcctggTggagggaagg	0.619995	0.735057	5.37729	6.34122	strong	1	0.963931	0.112599
chr12	82910687	chr12:82910687:C:T	C	T	SNV	NFIC	jaspar2022	MA1527.1	MA1527.1	gatttcccatggagtcTggctgctccccagcct	0.722842	0.839626	12.468	14.4635	strong	1	1.99554	0.115994
chr12	124904986	chr12:124904986:A:C	A	C	SNV	NR2F2	jaspar2022	MA1111.1	MA1111.1	cctcttgcctAcggtcactcc	0.84452	0.763185	8.77348	7.94178	strong	1	-0.831704	-0.0802543
chr17	9241094	chr17:9241094:G:A	G	A	SNV	NFIC	jaspar2022	MA1527.1	MA1527.1	ggcctggcttggggccAggggcttgtttgagct	0.820782	0.935925	14.1415	16.109	strong	1	1.96749	0.114363
chr1	27392588	chr1:27392588:A:T	A	T	SNV	NR2F2	jaspar2022	MA1111.1	MA1111.1	cggaccgctgAcgtcaccgaa	0.763344	0.648955	7.9434	6.77371	strong	1	-1.16969	-0.112868
chr1	25819901	chr1:25819901:C:G	C	G	SNV	NR2F1	jaspar2022	MA1538.1	MA1538.1	tgcgcggaggtgcgGctcggtgcgcagct	0.506223	0.573558	8.33781	9.42555	strong	1	1.08774	0.0666739
chr19	51334090	chr19:51334090:C:T	C	T	SNV	NR2F1	jaspar2022	MA1538.1	MA1538.1	gcaggatggatgacCtatgacggcactga	0.759689	0.672056	12.4323	11.0167	strong	1	-1.41564	-0.0867727
chr10	78303130	chr10:78303130:G:A	G	A	SNV	SOX8	jaspar2022	MA0868.2	MA0868.2	aaggccctgAgcaaagggg	0.637697	0.693227	5.81146	6.30381	weak	1	0.492347	0.0545611
chrX	71254216	chrX:71254216:C:T	C	T	SNV	RELB	jaspar2022	MA1117.1	MA1117.1	accccattggCtggctcgagg	0.53116	0.446717	4.87602	4.13909	strong	1	-0.736929	-0.0821772
chr5	136082636	chr5:136082636:C:A	C	A	SNV	CTCF	jaspar2022	MA1929.1	MA1929.1	aaggacccagcgggtgcgttccaggtgctccccCtggtggggaaatgtccctggacagtaaggaaat	0.810217	0.698593	11.1783	9.75094	strong	1	-1.42738	-0.104915
chr6	110320053	chr6:110320053:C:T	C	T	SNV	NFIC	jaspar2022	MA1527.1	MA1527.1	aggcctggcacagtgcCagccataaagcaggtg	0.974324	0.858364	16.7651	14.7837	strong	1	-1.98145	-0.115174
chr14	101810380	chr14:101810380:T:C	T	C	SNV	ZEB1	jaspar2022	MA0103.3	MA0103.3	gaggcgggccTgtcgcgcctg	0.659698	0.539606	6.91753	5.67344	strong	1	-1.2441	-0.119133
chr10	12053730	chr10:12053730:A:G	A	G	SNV	SP4	jaspar2022	MA0685.2	MA0685.2	ctagggcaGgtcatttg	0.56215	0.673236	7.34583	8.79396	strong	1	1.44813	0.110936
chrX	46904059	chrX:46904059:T:G	T	G	SNV	CTCF	jaspar2022	MA1929.1	MA1929.1	ggcccagggaggcactttccatcacaggcaccaGgacggggaccaagtggggagtctcccgagcccc	0.622477	0.706215	8.77761	9.84841	strong	1	1.0708	0.0787055
chr2	96305617	chr2:96305617:T:C	T	C	SNV	CTCF	jaspar2022	MA1929.1	MA1929.1	gtcgcgccccagaagtgcggggcggggcgtgtcCggggcgtgtccctgccgtgtgcgcgcggctttc	0.554028	0.642086	7.90232	9.02836	strong	1	1.12604	0.0827655
chr3	197627986	chr3:197627986:C:A	C	A	SNV	MEF2A	jaspar2022	MA0052.4	MA0052.4	cggggtctaaggggAggggacgccgcgcc	0.397663	0.469779	4.35161	5.08562	strong	1	0.734013	0.0700239
chr12	112963786	chr12:112963786:G:A	G	A	SNV	CTCF	jaspar2022	MA0139.1	MA0139.1	ttgctgagcctcttctctGccctctgctgctgtcctt	0.847018	0.78897	11.6929	10.9097	strong	1	-0.783266	-0.056935
chr6	21378955	chr6:21378955:C:T	C	T	SNV	NR2F1	jaspar2022	MA1538.1	MA1538.1	gcactctgggaggcTgaggtgcgcagatc	0.528966	0.559272	8.70521	9.19478	weak	1	0.489568	0.0300084
chr22	19144867	chr22:19144867:A:T	A	T	SNV	CTCF	jaspar2022	MA1930.1	MA1930.1	gcgctattcatgcttgtcaatgctgtgaacacgAgggggtgctgtggaggtggcggggaggatgctat	0.81561	0.755904	13.4019	12.4778	strong	1	-0.924094	-0.0568468
chr17	33199026	chr17:33199026:G:A	G	A	SNV	NFIC	jaspar2022	MA1527.1	MA1527.1	ttattttatttttctgGcatcacgccagttaaa	0.97228	0.859289	16.7302	14.7995	strong	1	-1.93071	-0.112226
chr20	61760946	chr20:61760946:T:C	T	C	SNV	SOX8	jaspar2022	MA0868.2	MA0868.2	tgtagatatTgttctgttg	0.982865	0.767573	8.87184	6.96299	strong	1	-1.90886	-0.211536
[truncated: 1,481 more rows]
