# Supplementary material for: Allele-specific transcription factor binding across human brain regions offers mechanistic insight into eQTLs
Source: HighWire-hosted journal article supplement (doi:10.1101/gr.278601.123), 2024-08-01
Supplement: Supplemental_Table_6.xlsx [file Supplemental_Table_6.xlsx]

## Sheet: Table6 LDSC
Supplemental Table 6: Results from LDSC analysis
Functional_category	Prop._SNPs	Prop._h2	Prop._h2_std_error	Enrichment	Enrichment_std_error	Coefficient	Coefficient_std_error	Coefficient_z.score	Enrichment_p	Enrichment_BH	Enrichment_holm	Coefficient_p	Coefficient_BH	Coefficient_holm	GWAS
Variants_p.05	0.0326711	0.0986976	0.0166933	3.02094	0.510949	4.54e-08	1.09e-08	4.17513	7.6e-05	0.000413567	0.00615287	1.49e-05	0.000112254	0.00128061	Neuroticism
Variants_ALL_wSignal	0.0480025	0.110568	0.0170459	2.30338	0.355105	2.78e-08	7.81e-09	3.56605	0.000273491	0.00141064	0.0218793	0.000181203	0.00126842	0.0154022	Neuroticism
Variants_ALL_wSignal	0.0480025	0.143786	0.026036	2.99538	0.542388	2.32e-08	8.33e-09	2.78085	0.000264694	0.00185286	0.022499	0.00271084	0.0204356	0.233132	BIP
Variants_p.05	0.0326711	0.12827	0.028373	3.92611	0.868442	3.81e-08	1.27e-08	3.00293	0.000821384	0.00574969	0.0698176	0.00133696	0.011631	0.118989	BIP
Variants_p.05	0.0326711	0.11301	0.0245214	3.45901	0.750551	1.63e-07	5.36e-08	3.03412	0.00161848	0.00610041	0.118149	0.0012062	0.00656711	0.0977025	SCZ
Variants_ALL_wSignal	0.0480025	0.112545	0.022195	2.34457	0.462372	7.79e-08	3.38e-08	2.30223	0.00487745	0.0177033	0.351176	0.0106611	0.0522395	0.842229	SCZ
Variants_p.001	0.00217626	0.0173314	0.00661378	7.96385	3.03906	4.43e-07	2.06e-07	2.15457	0.0247512	0.0591614	1	0.0155976	0.0764284	1	SCZ
Variants_p.001	0.00217626	-0.0287401	0.0144974	-13.2062	6.66161	-1.38e-06	4.84e-07	-2.85457	0.0331835	0.098545	1	0.997845	0.999858	1	IBD
Variants_ALL_wSignal	0.0480025	0.0899413	0.0229378	1.87368	0.477845	1.91e-08	1.41e-08	1.35256	0.0640238	0.149389	1	0.0880986	0.361294	1	BMI
Variants_ALL_wSignal	0.0480025	0.275004	0.104147	5.72895	2.16962	5.27e-08	2.34e-08	2.25511	0.021648	0.163192	1	0.0120631	0.353374	1	ALS
Variants_ALL_wSignal	0.0480025	0.278146	0.111027	5.79441	2.31294	1.92e-08	1.16e-08	1.66412	0.0434011	0.193332	1	0.048044	0.415671	1	AD
Variants_p.05	0.0326711	-0.0476147	0.0484316	-1.45739	1.4824	-1.4e-07	4.82e-08	-2.91269	0.0990878	0.279668	1	0.998208	0.999898	1	RA
Variants_p.05	0.0326711	0.197386	0.0997781	6.04161	3.05401	1.89e-08	1.5e-08	1.26456	0.104906	0.317629	1	0.103015	0.504773	1	AD
Variants_p.001	0.00217626	0.0370161	0.023543	17.009	10.8181	5.57e-08	5.18e-08	1.07548	0.147002	0.380066	1	0.14108	0.575795	1	AD
Variants_p.05	0.0326711	0.0945879	0.0458278	2.89515	1.4027	2.31e-08	1.86e-08	1.24027	0.167207	0.406163	1	0.107438	0.593559	1	MDD
Variants_ALL_wSignal	0.0480025	0.0899456	0.0341008	1.87377	0.710398	3.18e-08	4.9e-08	0.649444	0.215503	0.414103	1	0.258026	0.705885	1	BD
Variants_p.05	0.0326711	0.00875061	0.0267587	0.267839	0.819033	-1.54e-07	6e-08	-2.55841	0.37547	0.465773	1	0.994742	1	1	Height
Variants_p.05	0.0326711	0.19777	0.103687	6.05335	3.17367	5.48e-08	3.49e-08	1.56873	0.106719	0.47878	1	0.0583551	0.559318	1	ALS
Variants_p.001	0.00217626	-0.0103557	0.0118391	-4.75848	5.4401	-4.45e-07	3.52e-07	-1.26538	0.291613	0.50137	1	0.897132	0.999993	1	BD
Variants_p.05	0.0326711	0.0716556	0.038351	2.19324	1.17385	6.02e-08	7.97e-08	0.754829	0.304752	0.523306	1	0.225176	0.641082	1	BD
Variants_ALL_wSignal	0.0480025	0.088809	0.0415529	1.85009	0.865641	7.51e-09	1.22e-08	0.618101	0.320946	0.569281	1	0.268254	0.773203	1	MDD
Variants_ALL_wSignal	0.0480025	-0.00406941	0.0614535	-0.0847749	1.28022	-2.34e-07	9.31e-08	-2.51744	0.392743	0.580607	1	0.99409	0.999824	1	IBD
Variants_ALL_wSignal	0.0480025	0.0660552	0.0282541	1.37608	0.588598	-9.3e-08	4.54e-08	-2.04784	0.518834	0.612599	1	0.979712	1	1	Height
Variants_p.001	0.00217626	-0.00241764	0.0074748	-1.11092	3.43469	-3.33e-07	2.33e-07	-1.42973	0.540363	0.630424	1	0.923602	1	1	Height
Variants_p.001	0.00217626	-0.00988429	0.0162009	-4.54187	7.44437	-3.4e-07	2.3e-07	-1.47855	0.454099	0.661286	1	0.93037	0.999898	1	RA
Variants_p.001	0.00217626	-0.001419	0.00571938	-0.652034	2.62808	-4.07e-08	7.67e-08	-0.530958	0.529685	0.665502	1	0.702276	0.99211	1	BMI
Variants_p.001	0.00217626	0.00569305	0.00541688	2.61598	2.48907	4.16e-08	4.97e-08	0.835605	0.516128	0.702508	1	0.201689	0.732055	1	Neuroticism
Variants_ALL_wSignal	0.0480025	0.225424	0.116016	4.6961	2.41688	1.4e-08	9.04e-09	1.5487	0.122308	0.705071	1	0.0607266	0.703707	1	PD
Variants_p.05	0.0326711	-0.00321738	0.0610228	-0.0984779	1.86779	-2.11e-07	1.34e-07	-1.57132	0.552829	0.711955	1	0.941946	0.999844	1	IBD
Variants_p.001	0.00217626	0.0110861	0.018234	5.09408	8.3786	4.95e-08	1.04e-07	0.47539	0.623912	0.798789	1	0.317254	0.865477	1	MDD
Variants_ALL_wSignal	0.0480025	0.0290668	0.0492826	0.605527	1.02667	-6.81e-08	3.15e-08	-2.16298	0.701687	0.818635	1	0.984729	0.999894	1	RA
Variants_p.001	0.00217626	0.0230951	0.0365561	10.6123	16.7976	9.52e-08	1.84e-07	0.51687	0.563883	0.819655	1	0.302623	0.917894	1	ALS
Variants_p.05	0.0326711	0.0398683	0.0260395	1.22029	0.797019	4.41e-09	2.4e-08	0.183824	0.779776	0.848979	1	0.427076	0.782875	1	BMI
Variants_ALL_wSignal	0.0480025	0.0661774	0.0515096	1.37863	1.07306	2.9e-08	4.24e-08	0.683629	0.723807	0.863905	1	0.247105	0.809061	1	ASD
Variants_p.05	0.0326711	0.197585	0.130342	6.04768	3.98951	1.78e-08	1.41e-08	1.25859	0.20099	0.882541	1	0.104089	0.669369	1	PD
Variants_ALL_wSignal	0.0480025	0.072804	0.0871897	1.51667	1.81636	-1.71e-07	2.09e-07	-0.815528	0.775797	0.902442	1	0.792615	0.994914	1	SLE
Variants_p.001	0.00217626	0.0520617	0.0425645	23.9225	19.5585	7.18e-08	6.58e-08	1.09217	0.24641	0.90721	1	0.137379	0.758868	1	PD
Variants_p.001	0.00217626	0.00303556	0.00750047	1.39485	3.44649	-1.47e-08	5.05e-08	-0.291081	0.908728	0.918096	1	0.614505	0.999746	1	BIP
Variants_p.001	0.00217626	0.00576006	0.0177599	2.64677	8.16071	1.29e-07	2.72e-07	0.473829	0.839808	0.932014	1	0.317811	0.865152	1	ASD
Variants_p.001	0.00217626	0.00627098	0.0265711	2.88154	12.2095	-6.43e-07	1.43e-06	-0.44877	0.876486	0.954396	1	0.673201	0.991017	1	SLE
Variants_p.05	0.0326711	0.0219048	0.0778478	0.670465	2.38277	-2.57e-07	2.87e-07	-0.895553	0.88746	0.966346	1	0.814754	0.995305	1	SLE
Variants_p.05	0.0326711	0.0363126	0.0542288	1.11146	1.65984	2.83e-08	6.11e-08	0.462508	0.94631	0.982205	1	0.321858	0.87617	1	ASD
