# Supplementary material for: Allele-specific transcription factor binding across human brain regions offers mechanistic insight into eQTLs
Source: HighWire-hosted journal article supplement (doi:10.1101/gr.278601.123), 2024-08-01
Supplement: Supplemental_Table_7.xlsx [file Supplemental_Table_7.xlsx]

## Sheet: Sheet1
Supplemental Table 7: GWAS sum stats used for LDSC analysis
Trait	Study	PMID
Schizophrenia	SCZ, Trubetskoy et al. (2022)	35396580
Bipolar disorder	BIP, Mullins et al. (2022)	34002096
Neuroticism	Neuroticism, Nagel et al. (2018)	29942085
Major depressive disorder	MDD, Wray et al. (2018)	29700475
Autism spectrum disorder	ASD, Grove et al. (2019)	30804558
Attention Deficit Hyperactivity Disorder	ADHD, Demontis et al. (2022)	36702997
Amyotrophic lateral sclerosis	ALS, van Rheenen et al. (2021)	34873335
Alzheimer's disease	AD, Bellenguez et al. (2022)	35379992
Parkinson's disease	PD, Nalls et al (2019)	31701892
