# Supplementary material for: Allele-specific transcription factor binding across human brain regions offers mechanistic insight into eQTLs
Source: HighWire-hosted journal article supplement (doi:10.1101/gr.278601.123), 2024-08-01
Supplement: Supplemental_Table_8.xlsx [file Supplemental_Table_8.xlsx]

## Sheet: BEGAIN_RNA_counts
Supplemental Table 8: RNA counts from donor1 for highlighted example in Figure 5.
Tissue	H1	H2	p-value	gene
Amy	30	117	2.4543e-13	BEGAIN
AnCg	58	97	0.00216813	BEGAIN
CB	79	166	2.83265e-08	BEGAIN
DLPFC	54	87	0.00682955	BEGAIN
DMPFC	43	104	5.19529e-07	BEGAIN
FP	63	89	0.0422292	BEGAIN
HC	68	136	2.2139e-06	BEGAIN
OL	46	71	0.0260756	BEGAIN
SCg	49	109	2.04747e-06	BEGAIN
Amy	62	87	0.0489152	WDR25
AnCg	103	106	0.890012	WDR25
CB	98	120	0.154778	WDR25
DLPFC	99	133	0.0300486	WDR25
DMPFC	73	75	0.934525	WDR25
FP	89	118	0.0513756	WDR25
HC	64	87	0.0730492	WDR25
OL	66	94	0.0324741	WDR25
SCg	92	128	0.0180877	WDR25
